# Supplementary material for: Synthesis of a fully protected long-chain polyamine subunit of aculeine B using the photoremovable NPEC group
Source: Royal Society of Chemistry journal article supplement (doi:10.1039/d3ob00369h), 2023-01-01

**Supporting Information**

Synthesis of a fully protected long-chain polyamine subunit of  
aculeine B using photoremovable NPEC group

[AUTHORS]

Masayoshi Miyahara, Ryoya Wakabayashi, Raku Irie, Masato Oikawa\*

[AFFILIATIONS]

Yokohama City University, Seto 22-2, Kanazawa-ku, Yokohama 236-0027,  
Japan

[CONTACT INFORMATION]

moikawa@yokohama-cu.ac.jp

[CONTENTS]

Synthetic procedures for all reactions --- S3

References and notes --- S35

NMR spectra of all new compounds --- S36

[SYNTHETIC PROCEDURES FOR ALL REACTIONS]

### General methods

For photoirradiation, a JAXMAN® U1 Nichia (365 nm, 3 W) LED flashlight or an AHH400S (435 W) high-pressure Hg lamp was used.

IR spectra were recorded on a JASCO FT/IR-400 spectrometer. <sup>1</sup>H and <sup>13</sup>C NMR spectra were recorded on a Bruker AVANCE III HD 400 spectrometer. Chemical shift values were reported in δ (ppm) with reference to internal residual solvent [<sup>1</sup>H NMR, CDCl<sub>3</sub> (7.24), C<sub>6</sub>D<sub>6</sub> (7.15), C<sub>5</sub>D<sub>5</sub>N (7.21); <sup>13</sup>C NMR, CDCl<sub>3</sub> (77.0), C<sub>6</sub>D<sub>6</sub> (128.0)]. The following abbreviations are used to designate the multiplicities; s = singlet, d = doublet, t = triplet, q = quartet, m = multiplet, br = broad. ESI mass spectra were recorded on a Thermo Fisher Scientific Q Exactive Focus mass spectrometer or a Sciex TripleTOF 5600+ mass spectrometer. Analytical thin-layer chromatography (TLC) was performed using a Merck silica gel 60 F254 plate (0.25 mm thickness). Flash column chromatography was carried out using Fuji Silysia silica gel BW-300 (200-400 mesh), Kanto chemical silica gel 60N (40-50 mesh), or Yamazen silica gel HiFlash (SiOH-30μ Premium, 30 μm, 60 Å) with automated flash column system EPCLC-Wprep2XY-10VW (Yamazen Corporation). All reactions susceptible to moisture and air were carried out in an atmosphere of argon gas, using the glassware oven-dried over 3 h. CH<sub>2</sub>Cl<sub>2</sub> and THF were purified by Glass Contour Solvent Dispensing System (Nikko Hansen). All other reagents were purchased at the highest commercial grade and used directly.

### ***N*-(3-Aminopropyl)-2-nitrobenzenesulfonamide (4)**

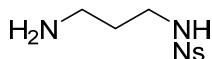

**4**

To a stirred solution of 1,3-diaminopropane (**3**, 1.10 g, 0.0149 mol) in ethanol (25 mL) at 0 °C was added 2-nitrobenzenesulfonyl chloride (1.10 g, 0.00496 mol) in eleven portions over 40 min. After 30 min, a solution of sodium ethoxide (337 mg, 0.00496 mmol) in ethanol (50 mL) was added, and the mixture was diluted with ethanol (30 mL).

After filtration of the mixture through a pad of Celite, the filtrate was concentrated under reduced pressure. Coevaporation with benzene (30 mL) gave a residue, which was purified by silica gel column chromatography (60N, 60 g, MeOH/<sup>i</sup>PrNH<sub>2</sub>/CH<sub>2</sub>Cl<sub>2</sub> = 5:5:190) to give *N*-*N*s amine **4** (1.31 g, 99%) as a white powder. The spectroscopic data were identical to those reported.<sup>1</sup>

***tert*-Butyl (3-((2-nitrophenyl)sulfonamido)propyl)carbamate (5)**

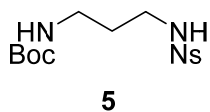

To a stirred solution of amine **4** (7.21 g, 27.8 mmol) in CH<sub>2</sub>Cl<sub>2</sub> (185 mL) at rt were added Et<sub>3</sub>N (4.65 mL, 33.4 mmol) and Boc<sub>2</sub>O (7.29 g, 33.4 mmol). After 3 h, hydrochloric acid (1 M, 36 mL) was added to the mixture. Organic layer was separated, and aqueous layer was extracted with CHCl<sub>3</sub> (100 mL). Combined organic layer was washed with brine (40 mL), dried over Na<sub>2</sub>SO<sub>4</sub>, and concentrated under reduced pressure. The residue was purified by silica gel column chromatography (SiOH-30μ Premium, 135 g, EtOAc/hexane = 1:1) to give *N*-Boc amine **5** (9.47 g, 94%) as a white solid. The spectroscopic data were identical to those reported.<sup>1</sup>

***tert*-Butyl (3-((*N*-(3-bromopropyl)-2-nitrophenyl)sulfonamido)propyl)carbamate (7)**

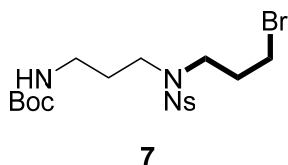

To a stirred mixture of K<sub>2</sub>CO<sub>3</sub> (18.20 g, 131.7 mmol) and 1,3-dibromopropane (**6**, 16.96 g, 79.0 mmol) at 60 °C was added a solution of *N*-*N*s amine **5** (9.47 g, 26.3 mmol) in DMF (44 mL) over 15 min. After 40 min, the mixture was cooled to rt, and water (44 mL) was added. The mixture was extracted with Et<sub>2</sub>O (3 × 60 mL). The combined extracts were washed with brine (40 mL), dried over Na<sub>2</sub>SO<sub>4</sub>, and concentrated under reduced pressure. The residue was purified by silica gel column chromatography (SiOH-30μ Premium, 135 g, EtOAc/hexane = 1:1) to give

secondary amine **7** (10.7 g, 85%) as a colorless oil. The spectroscopic data were identical to those reported.<sup>1</sup>

***N*-(3-Hydroxypropyl)-2-nitrobenzenesulfonamide (8)**

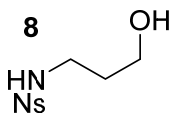

To a stirred solution of 3-aminopropanol (2.94 g, 39.2 mmol) in CH<sub>2</sub>Cl<sub>2</sub> (100 mL) at 0 °C were added 2-nitrobenzenesulfonyl chloride (6.94 g, 31.3 mmol) and pyridine (2.96 mL, 31.3 mmol). After 2 h, hydrochloric acid (1 M, 48 mL) was added. Organic layer was separated, and aqueous layer was extracted with CH<sub>2</sub>Cl<sub>2</sub> (2 × 50 mL). Combined organic layer was washed with brine (50 mL), dried over Na<sub>2</sub>SO<sub>4</sub>, and concentrated under reduced pressure. The residue was purified by silica gel column chromatography (SiOH-30μ Premium, 135 g, EtOAc/hexane = 1:1) to give *N*-Ns amine **8** (6.28 g, 87%) as a colorless oil. The spectroscopic data were identical to those reported.<sup>1</sup>

***tert*-Butyl (3-((*N*-(3-((*N*-(3-hydroxypropyl)-2-nitrophenyl)sulfonamido)propyl)-2-nitrophenyl)sulfonamido)propyl)carbamate (9)**

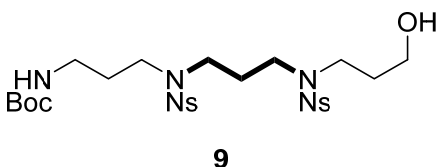

To a stirred solution of bromide **7** (3.41 g, 7.10 mmol) and *N*-Ns amine **8** (923 mg, 3.55 mmol) in CH<sub>3</sub>CN (12 mL) at rt were added Cs<sub>2</sub>CO<sub>3</sub> (5.78 g, 17.7 mmol) and Bu<sub>4</sub>NI (655 mg, 1.77 mmol). After stirring at 60 °C for 90 min, brine (40 mL) was added, and the mixture was extracted with CH<sub>2</sub>Cl<sub>2</sub> (3 × 40 mL). Combined layer was dried over Na<sub>2</sub>SO<sub>4</sub> and concentrated under reduced pressure. The residue was purified by silica gel column chromatography (SiOH-30μ Premium, 135 g, EtOAc/hexane = 1:1) to give 3-mer triamine **9** (1.96 g, 83%) as a white foam. The spectroscopic data were identical to those reported.<sup>1</sup>

**2,2-Dimethyl-9,13-bis((2-nitrophenyl)sulfonyl)-4-oxo-3-oxa-5,9,13-**

triazahexadecan-16-yl methanesulfonate (**10**), and  
*tert*-butyl (3-((*N*-(3-((*N*-(3-iodopropyl)-2-  
 nitrophenyl)sulfonamido)propyl)-2-  
 nitrophenyl)sulfonamido)propyl)carbamate (**11**)

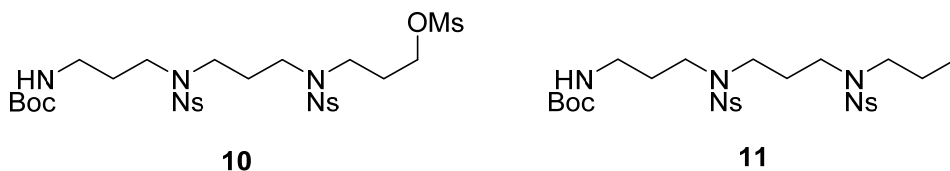

To a stirred solution of alcohol **9** (780 mg, 1.18 mmol) in CH<sub>2</sub>Cl<sub>2</sub> (4.0 mL) at 0 °C were added Et<sub>3</sub>N (0.330 mL, 2.36 mmol) and MsCl (0.182 mL, 2.36 mmol). After stirring at rt for 3.5 h, to the mixture were added hydrochloric acid (1 M, 1 mL) and water (5 mL). Organic layer was separated, and aqueous layer was extracted with CH<sub>2</sub>Cl<sub>2</sub> (3 × 5 mL). Combined organic layer was washed with brine (5 mL), dried over Na<sub>2</sub>SO<sub>4</sub>, and concentrated under reduced pressure to give crude mesylate **10** (872 mg) which was used for the next reaction without purification.

To a stirred solution of crude mesylate **10**, thus obtained above, in 2-butanone (8.0 mL) at rt was added NaI (532 mg, 3.55 mmol). After stirring at 60 °C for 80 min, water (5 mL) was added and the mixture was extracted with Et<sub>2</sub>O (3 × 20 mL). Combined extracts were washed with brine (10 mL), dried over Na<sub>2</sub>SO<sub>4</sub>, and concentrated under reduced pressure. The residue was purified by silica gel column chromatography (SiOH-30μ Premium, 16 g, EtOAc/hexane = 1:1) to give iodide **11** (849 mg, 93%) as a colorless oil. The spectroscopic data were identical to those reported.<sup>1</sup>

*N*-(3-Aminopropyl)-*N*-(3-((*N*-(3-hydroxypropyl)-2-  
 nitrophenyl)sulfonamido)propyl)-2-nitrobenzenesulfonamide (**12**), and  
*N*-(3-hydroxypropyl)-2-nitro-*N*-(3-((2-nitro-*N*-(3-((2-  
 nitrophenyl)sulfonamido)propyl)phenyl)sulfonamido)propyl)benzenesul  
 fonamide (**13**)

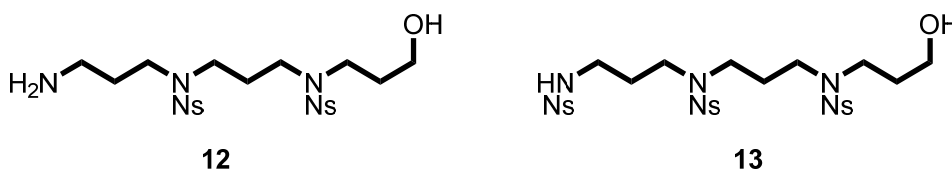

To a stirred solution of *N*-Boc amine **9** (612 mg, 0.927 mmol) in CH<sub>2</sub>Cl<sub>2</sub> (2.1 mL) and MeOH (4.1 mL) at 0 °C was added SOCl<sub>2</sub> (0.606 mL, 8.35 mmol). After 1 h, the mixture was concentrated under reduced pressure to remove volatile materials, to give primary amine **12** (567 mg) as a colorless oil which was used for the next reaction without purification.

The crude amine **12**, thus obtained above, was dissolved in CH<sub>2</sub>Cl<sub>2</sub> (9.2 mL) and Et<sub>3</sub>N (0.257 mL, 1.85 mmol), and 2-nitrobenzenesulfonyl chloride (226 mg, 1.02 mmol) was added at 0 °C. After 1.5 h, hydrochloric acid (1 M, 4 mL) was added at rt, and the mixture was extracted with CH<sub>2</sub>Cl<sub>2</sub> (3 × 15 mL). Combined organic layer was washed with brine (2 × 3 mL), dried over Na<sub>2</sub>SO<sub>4</sub>, and concentrated under reduced pressure. The residue was purified by silica gel column chromatography (SiOH-30μ Premium, 16 g, MeOH/CHCl<sub>3</sub> = 3:97) to give tri-*N*-Ns amine **13** (653 mg, 94%) as a yellow oil: IR (neat) 3428, 2104, 1640, 1541, 1461, 1440, 1342, 1217, 1162, 1124, 1060 cm<sup>-1</sup>; <sup>1</sup>H NMR (400 MHz, CDCl<sub>3</sub>) δ 8.09 (m, 1H), 8.02–7.94 (m, 2H), 7.84 (m, 1H), 7.78–7.66 (m, 6H), 7.65–7.57 (m, 2H), 5.60 (t, *J* = 6.3 Hz, 1H), 3.68–3.63 (m, 2H), 3.40 (t, *J* = 7.1 Hz, 2H), 3.36 (t, *J* = 7.0 Hz, 2H), 3.29 (t, *J* = 7.3 Hz, 2H), 3.27 (t, *J* = 7.3 Hz, 2H), 3.12 (q, *J* = 6.5 Hz, 2H), 1.93–1.71 (m, 6H); <sup>13</sup>C NMR (100 MHz, CDCl<sub>3</sub>) δ 148.0, 147.9 (×2), 133.9, 133.8, 133.7, 133.3, 132.9, 132.7, 132.5, 132.1, 132.0, 130.9, 130.7, 130.6, 125.4, 124.3, 124.2, 59.2, 45.6, 45.5, 45.3, 45.0, 40.8, 31.0, 28.8, 27.6; HRMS calcd for C<sub>27</sub>H<sub>33</sub>N<sub>6</sub>O<sub>13</sub>S<sub>3</sub><sup>+</sup> [(M+H)<sup>+</sup>] 745.1262, found 745.1255.

**tert-Butyl** (23-hydroxy-4,8,12,16,20-pentakis((2-nitrophenyl)sulfonyl)-4,8,12,16,20-pentaazatricosyl)carbamate (**14**)

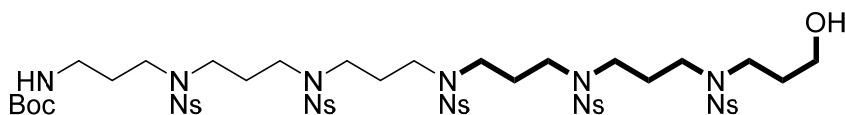

**14** (6-mer polyamine)

To a stirred solution of tri-*N*-Ns amine **13** (85.0 mg, 0.114 mmol) in CH<sub>3</sub>CN (0.160 mL) at 60 °C were added a solution of iodide **11** (152 mg,

0.198 mmol) in CH<sub>3</sub>CN (0.600 mL) and Cs<sub>2</sub>CO<sub>3</sub> (111 mg, 0.342 mmol). After 1 h, brine (3 mL) was added at rt, and the mixture was extracted with CH<sub>2</sub>Cl<sub>2</sub> (3 × 2 mL). Combined organic layer was washed with brine (2 × 3 mL), dried over Na<sub>2</sub>SO<sub>4</sub>, and concentrated under reduced pressure. The residue was purified by silica gel column chromatography (SiOH-30 $\mu$  Premium, 16 g, MeOH/CHCl<sub>3</sub> = 3:97) to give 6-mer polyamine **14** (149 mg, 94%) as a colorless oil: IR (neat) 3439, 3096, 3020, 2976, 2935, 1703, 1591, 1543, 1459, 1440, 1368 cm<sup>-1</sup>; <sup>1</sup>H NMR (400 MHz, CDCl<sub>3</sub>)  $\delta$  7.99–7.89 (m, 5H), 7.74–7.65 (m, 10H), 7.64–7.55 (m, 5H), 4.82 (brs, 1H), 3.62 (t, *J* = 5.8 Hz, 1H), 3.40 (t, *J* = 7.1 Hz, 1H), 3.34–3.18 (m, 18H), 3.12–3.04 (m, 2H), 1.92–1.63 (m, 12H), 1.40 (s, 9H).

**2,2-Dimethyl-9,13,17,21,25-pentakis((2-nitrophenyl)sulfonyl)-4-oxo-3-oxa-5,9,13,17,21,25-hexaazaocacosan-28-yl methanesulfonate (15), and**

**tert-butyl (23-iodo-4,8,12,16,20-pentakis((2-nitrophenyl)sulfonyl)-4,8,12,16,20-pentaazatricosyl)carbamate (16)**

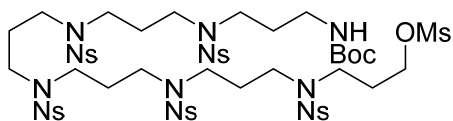**15**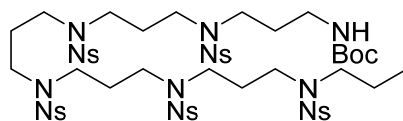**16**

To a stirred solution of 6-mer alcohol **14** (199 mg, 0.140 mmol) in CH<sub>2</sub>Cl<sub>2</sub> (0.480 mL) at 0 °C were added Et<sub>3</sub>N (0.025 mL, 0.17 mmol) and MsCl (0.014 mL, 0.17 mmol). After 50 min, hydrochloric acid (1 M, 3 mL) was added at rt, and the mixture was extracted with CH<sub>2</sub>Cl<sub>2</sub> (3 × 3 mL). Combined organic layer was washed with brine (2 × 3 mL), dried over Na<sub>2</sub>SO<sub>4</sub>, and concentrated under reduced pressure to give crude mesylate **15** (236.0 mg) as a pale yellow oil.

To a stirred solution of the crude mesylate **15**, thus obtained above, in 2-butanone (1.30 mL) at 60 °C was added NaI (65.0 mg, 0.430 mmol). After 1.5 h, water (2 mL) was added at rt and the mixture was extracted with CH<sub>2</sub>Cl<sub>2</sub> (3 × 3 mL). Combined organic layer was washed with brine (2 × 3 mL), dried over Na<sub>2</sub>SO<sub>4</sub>, and concentrated under reduced pressure. The residue was purified by silica gel column chromatography (SiOH-30 $\mu$  Premium, 16 g, MeOH/CHCl<sub>3</sub> = 6:94) to give



iodide **16** (177 mg, 83%) as a pale yellow oil: IR (ATR) 2941, 1704, 1541, 1439, 1342, 1265, 1157, 1059, 851, 730, 651  $\text{cm}^{-1}$ ;  $^1\text{H}$  NMR (400 MHz,  $\text{CDCl}_3$ )  $\delta$  8.03–7.91 (m, 5H), 7.75–7.66 (m, 10H), 7.65–7.58 (m, 5H), 4.81 (brs, 1H), 3.37–3.16 (m, 20H), 3.13–3.01 (m, 4H), 2.06–1.94 (m, 2H), 1.89–1.74 (m, 8H), 1.72–1.62 (m, 2H), 1.39 (s, 9H);  $^{13}\text{C}$  NMR (100 MHz,  $\text{CDCl}_3$ )  $\delta$  156.0, 148.0, 147.9, 147.9 ( $\times 3$ ), 133.9 ( $\times 4$ ), 133.8, 132.7, 132.5 ( $\times 2$ ), 132.4, 132.2, 132.1, 132.1, 132.1, 132.0, 130.8, 130.6 ( $\times 3$ ), 130.4, 124.3, 124.3, 124.2 ( $\times 2$ ), 124.2, 79.1, 48.3, 45.7, 45.3 ( $\times 7$ ), 45.3, 37.3, 31.8, 28.6, 28.4 ( $\times 4$ ), 27.4, 27.3 ( $\times 3$ ).

***N*-(19-Amino-4,8,12,16-tetrakis((2-nitrophenyl)sulfonyl)-4,8,12,16-tetraazanonadecyl)-*N*-(3-hydroxypropyl)-2-nitrobenzenesulfonamide (17), and**

***N*-(19-hydroxy-4,8,12,16-tetrakis((2-nitrophenyl)sulfonyl)-4,8,12,16-tetraazanonadecyl)-2-nitro-*N*-(3-(2-nitrophenylsulfonamido)propyl)benzenesulfonamide (18)**

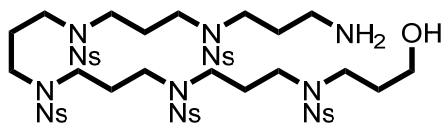**17**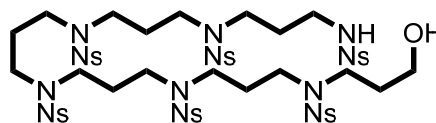**18**

To a stirred solution of 6-mer *N*-Boc amine **14** (103 mg, 0.0740 mmol) in  $\text{CH}_2\text{Cl}_2$  (0.174 mL) at 0 °C was added a solution of  $\text{SOCl}_2$  (0.051 mL, 0.71 mmol) in MeOH (0.350 mL). After 1 h, the mixture was concentrated under reduced pressure to remove volatile materials, to give primary amine **17** (100.0 mg) as a colorless oil.

The amine, thus obtained above, was dissolved in  $\text{CH}_2\text{Cl}_2$  (0.742 mL). To the stirred solution at 0 °C were added  $\text{Et}_3\text{N}$  (0.021 mL, 0.15 mmol) and  $\text{NsCl}$  (18.0 mg, 0.082 mmol). After 1 h, the mixture was allowed to warm to rt, and hydrochloric acid (1 M, 2 mL) was added. The mixture was extracted with  $\text{CH}_2\text{Cl}_2$  (3  $\times$  3 mL). Combined organic layer was washed with brine (2  $\times$  3 mL), dried over  $\text{Na}_2\text{SO}_4$ , and concentrated under reduced pressure. The residue was purified by silica gel column chromatography (SiOH-30 $\mu$  Premium, 16 g, MeOH/ $\text{CHCl}_3$  = 8:92) to give 6-mer tetra-*N*-Ns amine **18** (68.0 mg, 62%) as a yellow oil:  $^1\text{H}$  NMR (400 MHz,  $\text{CDCl}_3$ )  $\delta$  8.08 (m, 1H), 8.00–7.92 (m, 5H), 7.82 (m, 1H), 7.74–

7.66 (m, 12H), 7.63-7.58 (m, 5H), 5.66 (t,  $J = 6.3$  Hz, 1H), 3.65-3.61 (m, 2H), 3.40 (t,  $J = 7.1$  Hz, 2H), 3.35 (t,  $J = 7.1$  Hz, 2H), 3.32-3.21 (m, 16H), 3.15-3.08 (m, 2H), 1.91-1.71 (m, 13H).

**tert-Butyl (47-hydroxy-4,8,12,16,20,28,32,36,40,44-decakis((2-nitrophenyl)sulfonyl)-24-((4-nitrophenyl)sulfonyl)-4,8,12,16,20,24,28,32,36,40,44-undecaazaheptatetracontyl)carbamate (2a)**

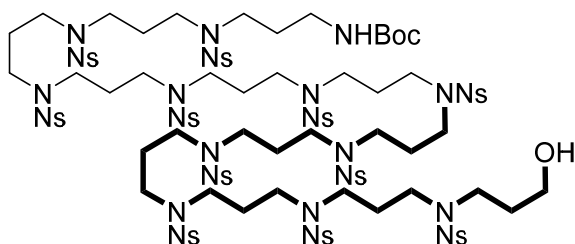

**2a** (12-mer LCPA subunit)

To a stirred solution of 6-mer *N*-Ns amine **18** (63.0 mg, 0.0430 mmol) in CH<sub>3</sub>CN (0.100 mL) at 60 °C were added a solution of 6-mer iodide **16** (128 mg, 0.0860 mmol) in CH<sub>3</sub>CN (0.290 mL) and Cs<sub>2</sub>CO<sub>3</sub> (42.0 mg, 0.130 mmol). After 3 h, brine (2 mL) was added at rt, and the mixture was extracted with CH<sub>2</sub>Cl<sub>2</sub> (5 × 2 mL). Combined organic layer was dried over Na<sub>2</sub>SO<sub>4</sub> and concentrated under reduced pressure to give an inseparable mixture (180.0 mg) of 12-mer LCPA subunit **2a** and iodide **16** as a white powder. The ratio was not determined since <sup>1</sup>H signals are broad.

Selected data for 12-mer polyamine **2a**: <sup>1</sup>H NMR (400 MHz, pyridine-d<sub>5</sub>) δ 8.27-8.05 (m, 11H), 7.98-7.81 (m, 11H), 7.82-7.65 (m, 22H), 4.14-4.00 (m, 2H), 4.00-3.71 (m, 6H), 3.71-3.44 (m, 38H), 3.42-3.23 (m, 2H), 2.21-1.87 (m, 24H), 1.52 (s, 9H).

**1-(2-Nitrophenyl)ethanol (20)**

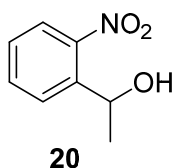

To a stirred solution of 2'-nitroacetophenone (**19**, 1.70 mL, 12.7

mmol) in THF (63 mL) at 0 °C was added sodium borohydride (958 mg, 25.3 mmol). After 21 h, water (30 mL) was added, and the mixture was extracted with CH<sub>2</sub>Cl<sub>2</sub> (4 × 20 mL). Combined organic layer was washed with brine (2 × 3 mL), dried over Na<sub>2</sub>SO<sub>4</sub>, and concentrated under reduced pressure to give alcohol **20** (2.12 g, 99%) as a yellow oil which was sufficiently pure and used for the next reaction (**19** → **20**) without purification. The spectroscopic data of alcohol **20** were in good agreement with those of the reported one.<sup>2</sup>

**2,5-Dioxopyrrolidin-1-yl (1-(2-nitrophenyl)ethyl) carbonate (21)**

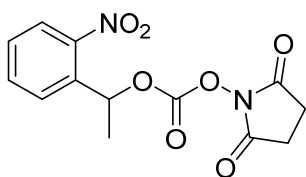

**21 (NPEC-OSu)**

To a stirred solution of alcohol **20** (521 mg, 3.12 mmol) in CH<sub>3</sub>CN (15.6 mL) at rt were added di(*N*-succinimidyl) carbonate (1.60 g, 6.24 mmol) and Et<sub>3</sub>N (0.87 mL, 6.24 mmol). After 2.5 h, the mixture was diluted with EtOAc (40 mL), washed successively with water (15 mL) and brine (10 mL), dried over Na<sub>2</sub>SO<sub>4</sub>, and concentrated under reduced pressure. The residue was purified by silica gel column chromatography (BW-300, 37 g, EtOAc/hexane = 40:60) to give NPEC-OSu **21** (993 mg, 94%) as a colorless oil. The spectroscopic data of NPEC-OSu **21** were in good agreement with those of the reported one.<sup>2-3</sup>

**1-(2-Nitrophenyl)ethyl carbonochloridate (22)**

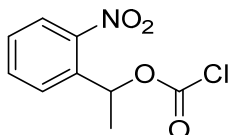

**22 (NPEC-Cl)**

To a stirred solution of alcohol **20** (2.02 g, 12.1 mmol) in THF (40 mL) at rt were added Na<sub>2</sub>CO<sub>3</sub> (1.54 g, 14.5 mmol) and triphosgene (7.16 g, 24.1 mmol). After 23 h, water (40 mL) was added at 0 °C, and the mixture was extracted with CH<sub>2</sub>Cl<sub>2</sub> (4 × 15 mL). Combined organic layer was dried over Na<sub>2</sub>SO<sub>4</sub> and concentrated under reduced pressure, to give an inseparable mixture of NPEC-Cl **22** (2.59 g, 93% conversion

yield) and alcohol **20** (208 mg) as a black yellow oil which was used for the next reactions without purification.

**1H-Benzo[d][1,2,3]triazol-1-yl (1-(2-nitrophenyl)ethyl) carbonate (23)**

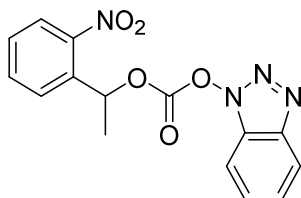

**23** (NPEC-OBt)

1-Hydroxybenzotriazole monohydrate (HOBt•H<sub>2</sub>O, 100.0 mg, 0.740 mmol) was azeotropically dehydrated with EtOH (3 × 3 mL) and toluene (3 × 3 mL), dried in vacuo at 60 °C for 2 h, and then dissolved in THF (1.6 mL). To the stirred solution of HOBt in THF at rt were added Et<sub>3</sub>N (0.124 mL, 0.888 mmol) and a solution of NPEC-Cl (**21**, 187.0 mg, 0.814 mmol, containing alcohol **20**) in THF (1.0 mL). After 30 min, to the reaction mixture was added saturated aqueous NH<sub>4</sub>Cl (2 × 4 mL) and the mixture was extracted with CHCl<sub>3</sub> (3 × 3 mL). Combined organic layer was dried over Na<sub>2</sub>SO<sub>4</sub> and concentrated under reduced pressure. The residue was purified by trituration with EtOAc (30 mL) to give NPEC-OBt **23** (152 mg, 63%) as a white powder: IR (ATR) 3087, 1763, 1520, 1462, 1429, 1341, 1287, 1221, 1185, 1037, 858 cm<sup>-1</sup>; <sup>1</sup>H NMR (400 MHz, CDCl<sub>3</sub>) δ 8.17 (d, *J* = 8.5 Hz, 1H), 8.03 (dd, *J* = 8.3, 1.2 Hz, 1H), 7.99 (d, *J* = 8.4 Hz, 1H), 7.88 (dd, *J* = 8.0, 1.4 Hz, 1H), 7.73 (dd, *J* = 7.8, 7.8 Hz, 1H), 7.69 (dd, *J* = 7.9, 7.9 Hz, 1H), 7.57–7.45 (m, 2H), 6.75 (q, *J* = 6.4 Hz, 1H), 1.87 (d, *J* = 6.4 Hz, 3H); <sup>13</sup>C NMR (100 MHz, CDCl<sub>3</sub>) δ 147.3, 146.4, 136.2, 134.3, 133.5, 132.9, 132.7, 129.2, 127.5, 126.5, 124.7, 115.7, 115.1, 73.4, 22.2; HRMS (ESI, positive) calcd for C<sub>15</sub>H<sub>12</sub>N<sub>4</sub>O<sub>5</sub>Na<sup>+</sup> [(M+Na)<sup>+</sup>] 351.0700, found 351.0700.

**1-(2-Nitrophenyl)ethyl (2-nitrophenyl)sulfonylcarbamate (24)**

(NsNH(NPEC)) (Table 1, run 2)

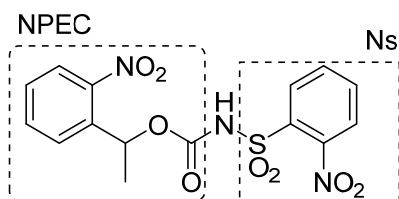

**24**  
"NPEC-NHNs"

To a stirred solution of NPEC-Cl **22** (2.59 g, 11.3 mmol) in CH<sub>2</sub>Cl<sub>2</sub> (78 mL) at rt were added 2-nitrobenzenesulfonamide (1.59 g, 7.84 mmol), Et<sub>3</sub>N (6.54 mL, 47.0 mmol), and DMAP (96.0 mg, 0.784 mmol). After 1.5 h, hydrochloric acid (1 M, 50 mL) was added. Organic layer was separated and aqueous layer was extracted with CH<sub>2</sub>Cl<sub>2</sub> (3 × 15 mL). Combined organic layer was dried over Na<sub>2</sub>SO<sub>4</sub> and concentrated under reduced pressure. The residue was purified by trituration with PhH (80 mL) to give *N*-NPEC-*N*-Ns amine **24** (2.62 g, 85%) as a white powder: IR (ATR) 3239, 1752, 1517, 1448, 1356, 1225, 1163, 1055, 843, 740, 655 cm<sup>-1</sup>; <sup>1</sup>H NMR (400 MHz, CDCl<sub>3</sub>) δ 8.29 (dd, *J* = 7.6, 1.6 Hz, 1H), 7.97–7.90 (m, 2H), 7.86 (dd, *J* = 7.8, 1.6 Hz, 1H), 7.79 (dt, *J* = 1.7, 7.7 Hz, 1H), 7.74 (dt, *J* = 1.5, 7.5 Hz, 1H), 7.66–7.57 (m, 2H), 7.44 (ddd, *J* = 8.6, 6.8, 2.0 Hz, 1H), 6.29 (q, *J* = 6.5 Hz, 1H), 1.63 (d, *J* = 6.5 Hz, 3H); <sup>13</sup>C NMR (100 MHz, CDCl<sub>3</sub>) δ 148.9, 148.1, 147.2, 136.6, 135.1, 134.0, 133.4, 132.7, 131.4, 128.9, 126.9, 125.2, 124.7, 71.7, 22.0; HRMS (ESI, positive) calcd for C<sub>15</sub>H<sub>13</sub>N<sub>3</sub>O<sub>8</sub>SNa<sup>+</sup> [(M+Na)<sup>+</sup>] 418.0316, found 418.0318.

**1-(2-Nitrophenyl)ethyl heptyl((2-nitrophenyl)sulfonyl)carbamate (25)**

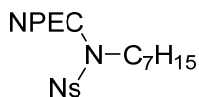

**25**

To a stirred solution of NPEC-NHNs **24** (41.6 mg, 0.104 mmol) in DMF (0.320 mL) at 80 °C were added K<sub>2</sub>CO<sub>3</sub> (72.8 mg, 0.528 mmol), 1-bromoheptane (0.0250 mL, 0.160 mmol), and TBAI (7.8 mg, 0.021 mmol). After 3 h, to the reaction mixture was added hydrochloric acid (1 M,

2 mL), and the mixture extracted with EtOAc (4 × 2 mL). Combined organic layer was washed with brine (2 × 2 mL), dried over Na<sub>2</sub>SO<sub>4</sub>, and concentrated under reduced pressure. The residue was purified by silica gel column chromatography (60N, 1.8 g, EtOAc/hexane = 3:7) to give heptylamine **4d** (35.0 mg, 77%) as a yellow oil: IR (ATR) 2930, 2858, 1735, 1525, 1442, 1365, 1265, 1172, 1057, 991, 854 cm<sup>-1</sup>; <sup>1</sup>H NMR (400 MHz, CDCl<sub>3</sub>) δ 8.28 (d, *J* = 7.6 Hz, 1H), 7.93 (d, 1H), 7.77–7.66 (m, 3H), 7.60 (t, *J* = 7.5 Hz, 1H), 7.48 (d, *J* = 7.8 Hz, 1H), 7.42 (t, *J* = 7.7 Hz, 1H), 6.27 (q, *J* = 6.5 Hz, 1H), 3.82 (dd, *J* = 9.1, 7.7 Hz, 2H), 1.72 (tt, *J* = 7.4, 7.4 Hz, 2H), 1.52 (d, *J* = 6.4 Hz, 3H), 1.38–1.15 (m, 8H), 0.86 (t, *J* = 6.6 Hz, 3H); <sup>13</sup>C NMR (100 MHz, CDCl<sub>3</sub>) δ 150.7, 147.8, 147.2, 136.9, 134.5, 133.9, 133.6, 133.1, 131.7, 128.8, 126.8, 124.7, 124.5, 72.1, 48.5, 31.7, 30.2, 28.8, 26.5, 22.5, 21.8, 14.0; HRMS (ESI, positive) calcd for C<sub>22</sub>H<sub>27</sub>N<sub>3</sub>O<sub>8</sub>SNa<sup>+</sup> [(M+Na)<sup>+</sup>] 516.1411, found 517.1414.

**1-(2-Nitrophenyl)ethyl benzyl((2-nitrophenyl)sulfonyl)carbamate (26)**

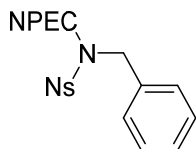

**26**

With the same procedure for the synthesis of **25** (see above), benzylamine **26** (62.0 mg, 98%) was obtained as a yellow oil starting from benzyl bromide (0.024 mL, 0.20 mmol), NPEC-NHNS **24**, TBAI, and K<sub>2</sub>CO<sub>3</sub>.

Data for benzylamine **26**: IR (ATR) 2932, 2859, 1733, 1542, 1442, 1265, 1173, 1057, 993, 700, 613 cm<sup>-1</sup>; <sup>1</sup>H NMR (400 MHz, CDCl<sub>3</sub>) δ 8.33 (dd, *J* = 7.8, 1.4 Hz, 1H), 7.93 (m, 1H), 7.85–7.72 (m, 3H), 7.50–7.34 (m, 7H), 6.85 (m, 1H), 6.25 (q, *J* = 6.5 Hz, 1H), 5.19 and 5.02 (AB, *J* = 16.2 Hz, 2H), 1.51 (d, *J* = 6.5 Hz, 3H); <sup>13</sup>C NMR (100 MHz, CDCl<sub>3</sub>) δ 150.8, 147.9, 147.1, 137.0, 136.9, 134.7, 134.4, 134.0, 132.5, 132.0, 128.8 (×2), 128.6, 127.8, 127.5 (×2), 126.8, 124.6, 124.6, 72.1, 51.4, 21.8; HRMS (ESI, positive) calcd for C<sub>16</sub>H<sub>16</sub>N<sub>2</sub>O<sub>4</sub>Na<sup>+</sup> [(M+Na)<sup>+</sup>] 323.1002,

found 323.1003.

**1-(2-Nitrophenyl)ethyl (2-nitrophenyl)sulfonyl(octyl)carbamate (27)**

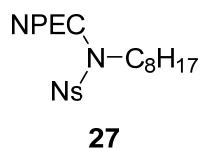

To a stirred solution of NPEC-NHNs **24** (550 mg, 1.36 mmol) in benzene (9.0 mL) at rt were added 1-octanol (0.423 mL, 2.68 mmol), triphenylphosphine (715 mg, 2.68 mmol), and a solution of diethyl azodicarboxylate in toluene (2.2 M, 1.25 mL, 2.68 mmol). After 16 h, the reaction mixture was concentrated under reduced pressure. The residue was purified by silica gel column chromatography (60N, 30 g, MeOH/CHCl<sub>3</sub> = 1:19) to give octylamine **27** (627 mg, 92%) as a pale yellow oil: IR (ATR) 2928, 2856, 1732, 1526, 1442, 1364, 1265, 1170, 1139, 1057, 993 cm<sup>-1</sup>; <sup>1</sup>H NMR (400 MHz, CDCl<sub>3</sub>) δ 8.29 (d, *J* = 7.4 Hz, 1H), 7.94 (dd, *J* = 8.2, 1.3 Hz, 1H), 7.77–7.66 (m, 3H), 7.60 (ddd, *J* = 8.2, 7.8, 1.0 Hz, 1H), 7.48 (dd, *J* = 8.0, 1.4 Hz, 1H), 7.42 (ddd, *J* = 8.6, 7.4, 1.5 Hz, 1H), 6.27 (q, *J* = 6.4 Hz, 1H), 3.82 (dd, *J* = 8.6, 6.6 Hz, 2H), 1.72 (tt, *J* = 7.6, 7.6 Hz, 2H), 1.56–1.50 (m, 7H), 1.39–1.19 (m, 6H), 0.91–0.81 (m, 3H); <sup>13</sup>C NMR (100 MHz, CDCl<sub>3</sub>) δ 150.7, 147.8, 147.2, 136.9, 134.5, 133.9, 133.6, 133.0, 131.7, 128.8, 126.8, 124.7, 124.5, 72.0, 48.5, 31.7, 30.2, 29.1, 29.1, 26.6, 22.6, 21.8, 14.0; HRMS (ESI, positive) calcd for C<sub>17</sub>H<sub>26</sub>N<sub>2</sub>O<sub>4</sub>Na<sup>+</sup> [(M+Na)<sup>+</sup>] 345.1785, found 345.1784.

**1-(2-Nitrophenyl)ethyl (2-(naphthalen-2-yl)ethyl)((2-nitrophenyl)sulfonyl)carbamate (28)**

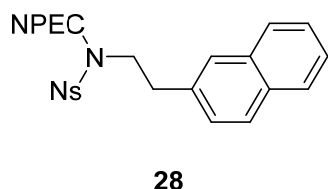

With the same procedure for the synthesis of **27** (see above), naphthalenylethylamine **28** (41.0 mg, 95%) was obtained as a pale yellow oil starting from 2-naphthaleneethanol (27.0 mg, 0.150 mmol),

NPEC-NHNs **24**, triphenylphosphine, and a solution of diethyl azodicarboxylate in toluene.

Data for naphthalenylethylamine **28**: IR (ATR) 3057, 1732, 1542, 1443, 1365, 1264, 1200, 1171, 1139, 1057, 854  $\text{cm}^{-1}$ ;  $^1\text{H}$  NMR (400 MHz,  $\text{CDCl}_3$ )  $\delta$  8.26 (d,  $J = 7.8$  Hz, 1H), 7.91 (d,  $J = 7.6$  Hz, 1H), 7.82-7.75 (m, 3H), 7.73 (d,  $J = 4.2$  Hz, 2H), 7.71-7.63 (m, 2H), 7.51-7.33 (m, 5H), 7.27 (d,  $J = 7.5$  Hz, 1H), 6.20 (q,  $J = 6.4$  Hz, 1H), 4.16 (dt,  $J = 7.4, 3.3$  Hz, 2H), 3.20 (t,  $J = 7.6$  Hz, 2H), 1.44 (d,  $J = 6.4$  Hz, 3H);  $^{13}\text{C}$  NMR (100 MHz,  $\text{CDCl}_3$ )  $\delta$  150.7, 147.8, 147.1, 136.7, 135.1, 134.6, 133.9, 133.7, 133.6, 132.9, 132.4, 131.8, 128.7, 128.3, 127.7, 127.7, 127.6, 127.4, 126.7, 126.1, 125.6, 124.6, 124.5, 72.3, 49.3, 36.9, 21.7; HRMS (ESI, positive) calcd for  $\text{C}_{27}\text{H}_{23}\text{N}_3\text{O}_8\text{SNa}^+$  [(M+Na) $^+$ ] 572.1098, found 572.1099.

**Ethyl** **2-(2-nitro-N-((1-(2-nitrophenyl)ethoxy)carbonyl)phenylsulfonamido)propanoate (29)**

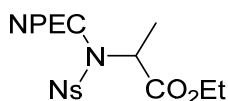

**29**

With the same procedure for the synthesis of **27** (see above), alanine ester **29** (34.0 mg, 85%, dr = 57:43) was obtained as a pale yellow oil starting from ethyl *rac*-lactate (0.0200 mL, 0.160 mmol), NPEC-NHNs **24**, triphenylphosphine, and a solution of diethyl azodicarboxylate in toluene.

Data for alanine ester **29**: IR (ATR) 2982, 1738, 1545, 1527, 1444, 1368, 1265, 1181, 1057, 909, 853  $\text{cm}^{-1}$ ;  $^1\text{H}$  NMR (400 MHz,  $\text{CDCl}_3$ )  $\delta$  8.48 and 8.44 (two double doublets,  $J = 6.7, 2.0$  Hz, 1H total), 7.94 (d,  $J = 8.3$  Hz, 1H), 7.80-7.67 (m, 3H), 7.62 (m, 1H), 7.50 (m, 1H), 7.42 (t,  $J = 7.8$  Hz, 1H), 6.34-6.24 (two multiplets, 1H total), 5.11 and 5.09 (two quartets,  $J = 6.5$  Hz, 1H total), 4.24-4.05 (two multiplets, 2H total), 1.73 and 1.70 (two doublets,  $J = 6.5$  Hz, 3H total), 1.52 and 1.45 (two doublets,  $J = 6.3$  Hz, 3H total), 1.20 and 1.14 (two triplets,  $J = 7.2$  Hz, 3H total);  $^{13}\text{C}$  NMR (100 MHz,  $\text{CDCl}_3$ )  $\delta$  169.7,



169.6, 150.7, 150.4, 150.2, 148.2, 148.1, 147.3, 147.1, 147.0, 136.8, 136.4, 134.5, 134.5, 134.1, 134.0, 133.5, 132.9, 132.5, 132.1, 132.0, 128.8, 128.8, 127.3, 124.6, 124.6, 124.5, 124.5, 72.8, 72.1, 62.0, 62.0, 56.0, 55.9, 21.8, 21.8, 16.7, 16.5, 14.0, 13.9; HRMS (ESI, positive) calcd for  $C_{20}H_{21}N_3O_{10}SNa^+$  [(M+Na)<sup>+</sup>] 518.0840, found 518.0844.

### 1-(2-Nitrophenyl)ethyl heptylcarbamate (**25a**)

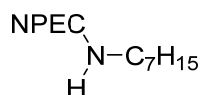

**25a**

To a stirred solution of *N*-NPEC-*N*-Ns heptylamine **25** (18.0 mg, 0.0360 mmol) in  $CH_3CN$  (0.670 mL) at 0 °C were added thiophenol (0.010 mL, 0.10 mmol) and  $Cs_2CO_3$  (33.0 mg, 0.100 mmol). After 1.5 h, the reaction mixture was poured into saturated aqueous  $NaHCO_3$  (2 mL), and the mixture was extracted with  $CH_2Cl_2$  (1 × 2 mL, 4 × 1 mL). Combined organic layer was washed with brine (2 × 2 mL), dried over  $Na_2SO_4$ , and concentrated under reduced pressure. The residue was purified by silica gel column chromatography (60N, 600 mg, EtOAc/hexane = 2:8) to give des-*N*-Ns product **25a** (9.7 mg, 88%) as a yellow oil: IR (ATR) 3345, 2929, 2856, 1703, 1523, 1446, 1346, 1253, 1200, 1133, 1063  $cm^{-1}$ ;  $^1H$  NMR (400 MHz,  $CDCl_3$ )  $\delta$  7.90 (d,  $J$  = 8.2 Hz, 1H), 7.62–7.57 (m, 2H), 7.39 (m, 1H), 6.21 (q,  $J$  = 6.5 Hz, 1H), 4.69 (brs, 1H), 3.23–2.98 (m, 2H), 1.59 (d,  $J$  = 6.5 Hz, 3H), 1.53–1.36 (m, 2H), 1.34–1.14 (m, 8H), 0.85 (t,  $J$  = 6.5 Hz, 3H);  $^{13}C$  NMR (100 MHz,  $CDCl_3$ )  $\delta$  155.2, 147.7, 138.8, 133.3, 128.1, 127.0, 124.4, 68.5, 41.0, 31.7, 29.9, 28.9, 26.6, 22.5, 22.2, 14.0; HRMS (ESI, positive) calcd for  $C_{16}H_{25}N_2O_4^+$  [(M+H)<sup>+</sup>] 309.1809, found 309.1808.

### 1-(2-Nitrophenyl)ethyl benzylcarbamate (**26a**)

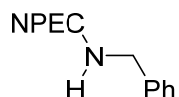

**26a**

With the same procedure for the synthesis of **25a** (see above), des-*N*-Ns product **26a** (8.0 mg, 89%) was obtained as a yellow oil starting

from *N*-NPEC-*N*-Ns benzylamine **26** (15.0 mg, 0.0310 mmol), thiophenol, and Cs<sub>2</sub>CO<sub>3</sub>.

Data for des-*N*-Ns product **26a**: IR (ATR) 3330, 3063, 2934, 1700, 1610, 1578, 1454, 1344, 1243, 1200, 1128 cm<sup>-1</sup>; <sup>1</sup>H NMR (400 MHz, CDCl<sub>3</sub>) δ 7.92 (d, *J* = 8.2 Hz, 1H), 7.66–7.55 (m, 2H), 7.40 (m, 1H), 7.35–7.19 (m, 5H), 6.28 (q, *J* = 6.5 Hz, 1H), 5.03 (brs, 1H), 4.43–4.21 (m, 2H), 1.61 (d, *J* = 6.5 Hz, 3H); <sup>13</sup>C NMR (100 MHz, CDCl<sub>3</sub>) δ 155.2, 147.6, 138.6, 138.2, 133.4, 128.7 (×3), 128.2, 127.6 (×2), 127.0, 124.4, 68.9, 45.1, 22.2; HRMS (ESI, positive) calcd for C<sub>16</sub>H<sub>16</sub>N<sub>2</sub>O<sub>4</sub>Na<sup>+</sup> [(M+Na)<sup>+</sup>] 323.1002, found 323.1003.

#### 1-(2-Nitrophenyl)ethyl octylcarbamate (**27a**)

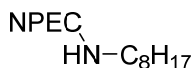

#### **27a**

With the same procedure for the synthesis of **25a** (see above), des-*N*-Ns product **27a** (9.8 mg, 91%) was obtained as a yellow oil starting from *N*-NPEC-*N*-Ns octylamine **27** (17.0 mg, 0.0330 mmol), thiophenol, and Cs<sub>2</sub>CO<sub>3</sub>.

Data for des-*N*-Ns product **27a**: IR (ATR) 3341, 2926, 2855, 1700, 1523, 1445, 1346, 1247, 1133, 1063, 856 cm<sup>-1</sup>; <sup>1</sup>H NMR (400 MHz, CDCl<sub>3</sub>) δ 7.90 (d, *J* = 8.2 Hz, 1H), 7.62–7.54 (m, 2H), 7.38 (m, 1H), 6.21 (q, *J* = 6.5 Hz, 1H), 4.69 (brs, 1H), 3.23–2.98 (m, 2H), 1.59 (d, *J* = 6.5 Hz, 3H), 1.49–1.37 (m, 2H), 1.32–1.15 (m, 10H), 0.85 (t, *J* = 6.7 Hz, 3H); <sup>13</sup>C NMR (100 MHz, CDCl<sub>3</sub>) δ 155.2, 147.7, 138.8, 133.3, 128.1, 127.0, 124.4, 68.5, 41.0, 31.7, 29.9, 29.2, 29.2, 26.7, 22.6, 22.2, 14.1; HRMS (ESI, positive) calcd for C<sub>17</sub>H<sub>26</sub>N<sub>2</sub>O<sub>4</sub>Na<sup>+</sup> [(M+Na)<sup>+</sup>] 345.1785, found 345.1784.

**1-(2-Nitrophenyl)ethyl (2-(naphthalen-2-yl)ethyl)carbamate (28a)**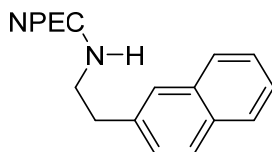**28a**

With the same procedure for the synthesis of **25a** (see above), des-*N*-Ns product **28a** (8.8 mg, 88%) was obtained as a yellow oil starting from *N*-NPEC-*N*-Ns naphthalenylethylamine **28** (16.0 mg, 0.029 mmol), thiophenol, and Cs<sub>2</sub>CO<sub>3</sub>.

Data for des-*N*-Ns product **28a**: IR (ATR) 3416, 3053, 2934, 1705, 1522, 1445, 1345, 1242, 1130, 1060, 1007 cm<sup>-1</sup>; <sup>1</sup>H NMR (400 MHz, CDCl<sub>3</sub>) δ 7.91 (d, *J* = 8.1 Hz, 1H), 7.84–7.73 (m, 3H), 7.59 (s, 1H), 7.56–7.49 (m, 2H), 7.49–7.41 (m, 2H), 7.37 (m, 1H), 7.28 (d, *J* = 8.4 Hz, 1H), 6.23 (q, *J* = 6.5 Hz, 1H), 4.74 (brs, 1H), 3.47 (dt, *J* = 6.8, 6.8 Hz, 2H), 2.93 (t, *J* = 6.8 Hz, 2H), 1.57 (d, *J* = 6.5 Hz, 3H); <sup>13</sup>C NMR (100 MHz, CDCl<sub>3</sub>) δ 155.2, 147.6, 138.7, 136.1, 133.5, 133.4, 132.3, 128.3, 128.1, 127.6, 127.5, 127.2, 127.1, 126.9, 126.2, 125.5, 124.4, 68.6, 41.9, 36.1, 22.2; HRMS (ESI, positive) calcd for C<sub>21</sub>H<sub>20</sub>N<sub>2</sub>O<sub>4</sub>Na<sup>+</sup> [(M+Na)<sup>+</sup>] 387.1315, found 387.1316.

**Ethyl 2-(((1-(2-nitrophenyl)ethoxy)carbonyl)amino)propanoate (29a)**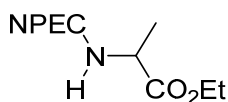**29a**

With the same procedure for the synthesis of **25a** (see above), des-*N*-Ns product **29a** (10.0 mg, 90%, dr = 57:43) was obtained as a yellow oil starting from *N*-NPEC-*N*-Ns alanine ester **29** (18.0 mg, 0.0360 mmol), thiophenol, and Cs<sub>2</sub>CO<sub>3</sub>.

Data for des-*N*-Ns product **29a**: IR (ATR) 3359, 2983, 1448, 1343, 1203, 1065, 855, 787, 734, 702, 674 cm<sup>-1</sup>; <sup>1</sup>H NMR (400 MHz, CDCl<sub>3</sub>) δ 7.92 and 7.90 (two doublets, *J* = 7.1 Hz, 1H total), 7.66–7.55 (two multiplets, 2H total), 7.39 (two multiplets, 1H total), 6.24 (q, *J* = 6.5 Hz, 1H),

5.33 and 3.16 (brs, 1H total), 4.30-4.08 (m, 3H), 1.60 (d,  $J = 6.5$  Hz, 3H), 1.38 and 1.33 (two doublets,  $J = 7.2$  Hz, 3H total), 1.29-1.17 (m, 3H);  $^{13}\text{C}$  NMR (100 MHz,  $\text{CDCl}_3$ )  $\delta$  172.9 ( $\times 2$ ), 155.1, 154.4, 147.5 ( $\times 2$ ), 138.7, 138.5, 133.6, 133.5, 133.4, 128.2, 128.2, 128.1, 127.1, 124.4, 68.9 ( $\times 2$ ), 61.5 ( $\times 2$ ), 49.6, 22.3 ( $\times 2$ ), 18.8, 18.7, 15.2, 14.1 ( $\times 2$ ); HRMS (ESI, positive) calcd for  $\text{C}_{14}\text{H}_{18}\text{N}_2\text{O}_6\text{Na}^+$  [(M+Na) $^+$ ] 333.1057, found 333.1058.

**Typical procedure for photodeprotection of NPEC group of 27 with the LED light (365 nm, 3 W) (Table 3, run 5): 2-nitro-*N*-octylbenzenesulfonamide (27b)**

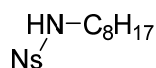

**27b**

A solution of *N*-NPEC-*N*-Ns octylamine **27** (1.60 mg, 0.00315 mmol) in MeOH (1 mL) at rt under Ar bubbling was irradiated with the LED light (365 nm, 3 W). After 20 min, the reaction mixture was concentrated under reduced pressure. The residue was purified by silica gel column chromatography (60N, 600 mg, EtOAc/hexane = 3:7) to give des-*N*-NPEC product **27b** (0.94 mg, 95%) as a brown oil: IR (ATR) 3293, 2925, 2856, 1593, 1539, 1414, 1362, 1340, 1265, 1163, 1124  $\text{cm}^{-1}$ ;  $^1\text{H}$  NMR (400 MHz,  $\text{CDCl}_3$ )  $\delta$  8.12 (m, 1H), 7.84 (m, 1H), 7.76-7.68 (m, 2H), 5.22 (brs, 1H), 3.07 (dt,  $J = 6.8, 6.8$  Hz, 2H), 1.54-1.44 (m, 2H), 1.31-1.13 (m, 10H), 0.84 (t,  $J = 6.8$  Hz, 3H);  $^{13}\text{C}$  NMR (100 MHz,  $\text{CDCl}_3$ )  $\delta$  148.1, 133.8, 133.4, 132.7, 131.1, 125.3, 43.9, 31.7, 29.5, 29.0, 28.9, 26.4, 22.6, 14.0; HRMS (ESI, positive) calcd for  $\text{C}_{14}\text{H}_{23}\text{N}_2\text{O}_4\text{S}^+$  [(M+H) $^+$ ] 315.1373, found 315.1373.

**Typical procedure for photodeprotection of NPEC group of 27 with high-pressure Hg lamp (435 W) (Table 3, run 11): 2-nitro-*N*-octylbenzenesulfonamide (27b)**

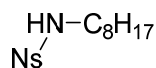

**27b**

A stirred solution of *N*-NPEC-*N*-Ns octylamine **27** (29.0 mg, 0.0571 mmol) in MeOH (40 mL) at rt under Ar bubbling was irradiated with

high pressure Hg lamp (435 W). After 1 h, the reaction mixture was concentrated under reduced pressure. The residue was purified by silica gel column chromatography (60N, 600 mg, EtOAc/hexane = 3:7) to give des-*N*-NPEC product **27b** (16.0 mg, 94%) as a brown oil. For spectroscopic data of **27b**, see above.

***N*-Heptyl-2-nitrobenzenesulfonamide (25b) (Table 4, run 1)**

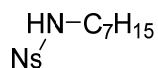

**25b**

With the same procedure for the synthesis of **27b** (see the procedure above for Table 3, entry 5), *N*-NPEC-*N*-Ns amine **25** (5.8 mg) was irradiated with the LED light (365 nm, 3 W) in MeOH at rt to give **25b**.<sup>4</sup>

***N*-Benzyl-2-nitrobenzenesulfonamide (26b) (Table 4, run 2)**

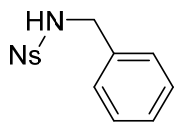

**26b**

With the same procedure for the synthesis of **27b** (see the procedure above for Table 3, entry 5), *N*-NPEC-*N*-Ns amine **26** (6.3 mg) was irradiated with the LED light (365 nm, 3 W) in MeOH at rt to give **26b**.<sup>4</sup>

***N*-(2-(Naphthalen-2-yl)ethyl)-2-nitrobenzenesulfonamide (28b) (Table 4, run 3)**

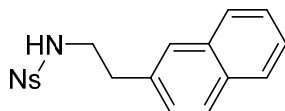

**28b**

With the same procedure for the synthesis of **27b** (see the procedure above for Table 3, entry 5), *N*-NPEC-*N*-Ns amine **28** (5.3 mg) was irradiated with the LED light (365 nm, 3 W) in MeOH at rt to give **28b**.

**Ethyl ((2-nitrophenyl)sulfonyl)alaninate (29b) (Table 4, run 4)**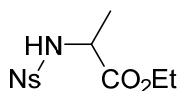**29b**

With the same procedure for the synthesis of **27b** (see the procedure above for Table 3, entry 5), *N*-NPEC-*N*-Ns amine **29** (5.2 mg) was irradiated with the LED light (365 nm, 3 W) in MeOH at rt to give **29b**.<sup>4</sup>

***N,N'*-(Propane-1,3-diyl)bis(2-nitrobenzenesulfonamide) (30)**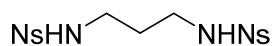**30**

To a stirred solution of 1,3-diaminopropane (**3**, 1.14 mL, 13.5 mmol) in THF (67.0 mL) at rt were added 2-nitrobenzenesulfonyl chloride (5.68 g, 25.6 mmol) and K<sub>2</sub>CO<sub>3</sub> (3.73 g, 27.0 mmol). After 23 h, the mixture was concentrated under reduced pressure, and to the residue were added CH<sub>2</sub>Cl<sub>2</sub> (30 mL) and hydrochloric acid (1 M, 30 mL). Organic layer was separated and aqueous layer was extracted with CH<sub>2</sub>Cl<sub>2</sub> (3 × 10 mL). Combined organic layer was washed with brine (2 × 20 mL), dried over Na<sub>2</sub>SO<sub>4</sub>, and concentrated under reduced pressure. The residue was washed with Et<sub>2</sub>O (60 mL) to give *N*-Ns diamine **30** (4.80 g, 84%) as a brown powder: IR (ATR) 3326, 3292, 1532, 1414, 1336, 1160, 1117, 1063, 1025, 854, 782 cm<sup>-1</sup>; <sup>1</sup>H NMR (400 MHz, CDCl<sub>3</sub>) δ 8.16–8.12 (m, 2H), 7.88–7.85 (m, 2H), 7.79–7.70 (m, 4H), 5.62 (m, 2H), 3.22 (dt, *J* = 6.4, 6.4 Hz, 4H), 1.79 (p, *J* = 6.2 Hz, 2H); <sup>13</sup>C NMR (100 MHz, CDCl<sub>3</sub>) δ 148.0 (×2), 135.6 (×2), 133.7 (×2), 133.0 (×2), 131.0 (×2), 125.5 (×2), 40.13 (×2), 30.4. The other spectroscopic data of **30** were in good agreement with those of the reported one.<sup>5</sup>

**((3-Bromopropoxy)methanetriyl)tribenzene (31)**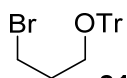**31**

To a stirred solution of 3-bromo-1-propanol (0.651 mL, 7.20 mmol) in

THF (14.0 mL) at rt were added trityl chloride (2.006 g, 7.20 mmol) and Et<sub>3</sub>N (1.00 mL, 7.20 mmol). After 18 h, the reaction mixture was concentrated under reduced pressure, and to the residue were added CH<sub>2</sub>Cl<sub>2</sub> (10 mL) and water (20 mL). Organic layer was separated and aqueous layer was extracted with CH<sub>2</sub>Cl<sub>2</sub> (3 × 10 mL). Combined organic layer was washed with brine (2 × 15 mL), dried over Na<sub>2</sub>SO<sub>4</sub>, and concentrated under reduced pressure. The residue was washed with hexane (60 mL) to give an inseparable mixture of Tr ether **31** (1.545 g, 56%) and TrOH (191 mg, 10%) as a white powder, which was used for the next reaction (**30+31**→**32**) without purification.

Data for Tr ether **31**: <sup>1</sup>H NMR (400 MHz, CDCl<sub>3</sub>) δ 7.44–7.38 (m, 6H), 7.33–7.18 (m, 9H), 3.54 (t, *J* = 6.7 Hz, 2H), 3.20 (t, *J* = 5.9 Hz, 2H), 2.10 (tt, *J* = 6.3, 6.3 Hz, 2H). The other spectroscopic data of **31** were in good agreement with those of the reported one.<sup>6</sup>

**2-Nitro-*N*-(3-(2-nitrophenylsulfonamido)propyl)-*N*-(3-(trityloxy)propyl)benzenesulfonamide (32)**

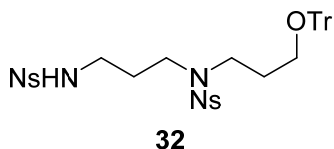

To a stirred solution of *N*-Ns amine **31** (4.74 g, 10.7 mmol) in DMF (35.0 mL) at 60 °C were added a solution of bromide **31** (1.36 g, 3.57 mmol) in DMF (71 mL) and K<sub>2</sub>CO<sub>3</sub> (2.95 g, 21.3 mmol). After 3.5 h, the reaction mixture was poured into water (120 mL) and EtOAc (50 mL). Organic layer was separated and aqueous layer was extracted with EtOAc (4 × 20 mL). Combined organic layer was washed with brine (2 × 30 mL), dried over Na<sub>2</sub>SO<sub>4</sub>, and concentrated under reduced pressure. The residue was purified by silica gel column chromatography (60N, 120 g, acetone/CHCl<sub>3</sub> = 1:9) to give dimer diamine **32** (2.49 g, 94%) as a yellow oil: <sup>1</sup>H NMR (400 MHz, CDCl<sub>3</sub>) δ 8.09 (m, 1H), 7.98 (ddd, *J* = 7.8, 6.1, 1.6 Hz, 1H), 7.82 (m, 1H), 7.76–7.50 (m, 5H), 7.37–7.31 (m, 5H), 7.30–7.17 (m, 10H), 5.56 (t, *J* = 6.3 Hz, 1H), 3.38–3.30 (m, 4H), 3.12 (dt, *J* = 6.3, 6.5 Hz, 2H), 3.07–3.01 (m, 2H), 1.83–1.68 (m, 4H).

***N*-(3-Hydroxypropyl)-2-nitro-*N*-(3-(2-nitro-*N*-(3-(trityloxy)propyl)phenylsulfonamido)propyl)benzenesulfonamide (33)**

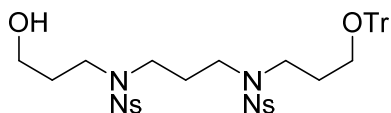**33**

To a stirred solution of *N*-Ns amine **33** (2.49 g, 3.34 mmol) in DMF (30.0 mL) at 60 °C were added K<sub>2</sub>CO<sub>3</sub> (2.95 g, 21.3 mmol) and 3-bromo-1-propanol (0.361 mL, 4.00 mmol). After 5 h, the reaction mixture was poured into water (50 mL), and the mixture was extracted with EtOAc (1 × 30 mL, 3 × 20 mL). Combined organic layer was washed with brine (2 × 30 mL), dried over Na<sub>2</sub>SO<sub>4</sub>, and concentrated in vacuo. The residue was purified by silica gel column chromatography (60N, 100 g, acetone/CHCl<sub>3</sub> = 2:8) to give trimer diamine **33** (1.80 g, 67%) as a pale yellow oil: IR (ATR) 3566, 3434, 2948, 2879, 1542, 1372, 1346, 1160, 1070, 766, 752 cm<sup>-1</sup>; <sup>1</sup>H NMR (400 MHz, C<sub>6</sub>D<sub>6</sub>) δ 7.88 (dd, *J* = 8.4, 1.4 Hz, 1H), 7.74 (dd, *J* = 8.0, 1.4 Hz, 1H), 7.50–7.43 (m, 6H), 7.15–7.10 (m, 6H), 7.08–7.01 (m, 3H), 6.79–6.67 (m, 4H), 6.60–6.51 (m, 2H), 3.37–3.22 (m, 6H), 3.21–3.12 (m, 4H), 3.01 (t, *J* = 6.0 Hz, 2H), 1.75–1.59 (m, 4H), 1.49 (tt, *J* = 6.5, 6.5 Hz, 2H), 1.19 (brs, 1H); <sup>13</sup>C NMR (100 MHz, C<sub>6</sub>D<sub>6</sub>) δ 148.4, 148.3, 144.6 (×3), 133.5, 133.3, 133.0, 133.0, 131.1, 131.1, 131.0, 130.9, 129.0 (×6), 128.1 (×6), 127.3 (×3), 123.9, 123.8, 87.1, 61.1, 59.2, 45.7, 45.5, 45.5, 45.1, 31.4, 29.3, 27.9; HRMS (ESI, positive) calcd for C<sub>40</sub>H<sub>42</sub>N<sub>4</sub>O<sub>10</sub>S<sub>2</sub>Na [(M+Na)<sup>+</sup>] 825.2235, found 825.2233.

**3-((3-((3-(Trityloxy)propyl)amino)propyl)amino)propan-1-ol (34), and**

***tert*-butyl (3-((*tert*-butoxycarbonyl)(3-(trityloxy)propyl)amino)propyl)(3-hydroxypropyl)carbamate (35)**

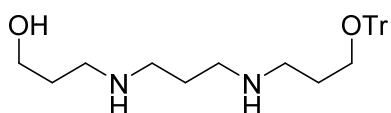**34**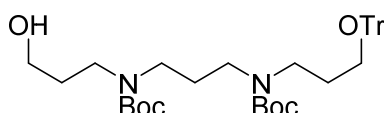**35**

To a stirred solution of di-*N*-Ns amine **33** (49.0 mg, 0.0610 mmol) in



CH<sub>3</sub>CN (0.670 mL) at 0 °C were added thiophenol (0.0200 mL, 0.180 mmol) and Cs<sub>2</sub>CO<sub>3</sub> (60.0 mg, 0.180 mmol). After 2.5 h, the mixture was poured into saturated aqueous NaHCO<sub>3</sub> (5 mL), and the mixture was extracted with CH<sub>2</sub>Cl<sub>2</sub> (1 × 3 mL, 3 × 2 mL). Combined organic layer was washed with brine (2 × 3 mL), dried over Na<sub>2</sub>SO<sub>4</sub>, and concentrated under reduced pressure to give diamine **34** (42.0 mg) as a yellow oil, which was used for the next reaction without purification.

To a stirred solution of the diamine **34** (42.0 mg), thus obtained above, in MeOH (0.610 mL) at rt was added Boc<sub>2</sub>O (0.099 mL, 0.43 mmol). After 22 h, the mixture was poured into water (3 mL), and the mixture was extracted with CH<sub>2</sub>Cl<sub>2</sub> (3 × 2 mL). Combined organic layer was washed with brine (2 × 3 mL), dried over Na<sub>2</sub>SO<sub>4</sub>, and concentrated under reduced pressure. The residue was purified by silica gel column chromatography (SiOH-30μ Premium, 16 g, MeOH/CHCl<sub>3</sub> = 6:94) to give di-*N*-Boc amine **35** (6.8 mg, 18%) as a pale yellow oil: IR (ATR) 3449, 2974, 1686, 1478, 1416, 1365, 1249, 1162, 1068, 736, 705 cm<sup>-1</sup>; <sup>1</sup>H NMR (400 MHz, C<sub>6</sub>D<sub>6</sub>) δ 7.58–7.47 (m, 6H), 7.14–7.09 (m, 6H), 7.08–7.00 (m, 3H), 3.64–3.49 (m, 2H), 3.41–2.80 (m, 10H), 1.93–1.70 (m, 2H), 1.70–1.54 (m, 2H), 1.54–1.41 (m, 11H), 1.41–1.32 (m, 9H); <sup>13</sup>C NMR (100 MHz, C<sub>6</sub>D<sub>6</sub>) δ 156.7, 155.3, 144.8 (×3), 129.0 (×6), 128.5 (×6), 127.2 (×3), 87.0, 79.6, 78.9, 61.7, 58.5, 45.3 (×2), 45.0 (×2), 43.2, 31.4, 29.9, 28.5 (×3), 28.4 (×3); HRMS (ESI, positive) calcd for C<sub>38</sub>H<sub>52</sub>N<sub>2</sub>O<sub>6</sub>Na [(M+Na)<sup>+</sup>] 655.3718, found 655.3718.

**Dimethyl 3,3'-(propane-1,3-diylbis(azanediyl)dipropionate (37), and dimethyl 3,3'-(2,2,12,12-tetramethyl-4,10-dioxo-3,11-dioxa-5,9-diazatridecane-5,9-diyl)dipropionate (38)**

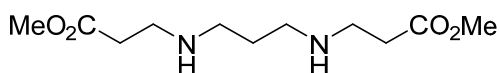**37**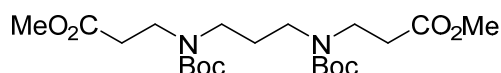**38**

To a stirred solution of 1,3-diaminopropane (**3**, 1.14 mL, 6.41 mmol) in EtOH (6.40 mL) at 0 °C was added a solution of methyl acrylate (1.21 mL, 13.5 mmol) in EtOH (6.40 mL) in a dropwise manner over 30 min. After 1 h, the reaction mixture was concentrated under reduced

pressure to remove volatile materials, to give diester **37** (1.75 g) as a colorless oil, which was used for the next reaction (**37**→**38**) without purification.

To a stirred solution of the crude trimer diamine **37** (1.75 g), thus obtained above, in MeOH (21 mL) at rt was added Boc<sub>2</sub>O (4.42 mL, 19.2 mmol). After 1.5 h, the reaction mixture was poured into water (20 mL), and the mixture was extracted with CH<sub>2</sub>Cl<sub>2</sub> (1 × 20 mL, 3 × 10 mL). Combined organic layer was washed with brine (2 × 20 mL), dried over Na<sub>2</sub>SO<sub>4</sub>, and concentrated under reduced pressure. The residue was purified by silica gel column chromatography (SiOH-30μ Premium, 40 g, EtOAc/hexane = 4:6) to give *N*-Boc diamine **38** (2.29 g, 80%) as a colorless oil: IR (ATR) 2976, 1737, 1686, 1477, 1415, 1365, 1249, 1157, 1045, 865, 734 cm<sup>-1</sup>; <sup>1</sup>H NMR (400 MHz, CDCl<sub>3</sub>) δ 3.63 (s, 6H), 3.42 (t, *J* = 6.6 Hz, 4H), 3.15 (t, *J* = 6.8 Hz, 4H), 2.52 (t, *J* = 6.6 Hz, 4H), 1.69 (tt, *J* = 6.8, 6.8 Hz, 2H), 1.40 (brs, 18H); <sup>13</sup>C NMR (100 MHz, CDCl<sub>3</sub>) δ 172.2 (×2), 155.1 (×2), 79.7 (×2), 51.6 (×2), 45.5 (×2), 43.3 (×2), 33.5 (×2), 28.4 (×7); HRMS (ESI, positive) calcd for C<sub>21</sub>H<sub>38</sub>N<sub>2</sub>O<sub>8</sub>Na [(M+Na)<sup>+</sup>] 469.2520, found 469.2522.

**Di-tert-butyl propane-1,3-diylbis((3-hydroxypropyl)carbamate) (39)**

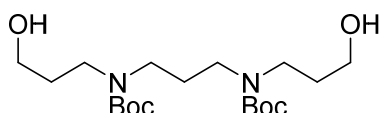

**39**

To a stirred suspension of lithium aluminum hydride (92.0 mg, 2.42 mmol) in THF (3.2 mL) at 0 °C was added a solution of diester **38** (111 mg, 0.242 mmol, including its ethyl ester) in THF (0.8 mL) in a dropwise manner over 10 min. After 2 h, saturated aqueous Rochelle's salt (14 drops) was added dropwise, and the mixture was vigorously stirred at rt for 14 h. The mixture was filtered through a pad of Celite®, and the filtrate was concentrated under reduced pressure. The residue was purified by silica gel column chromatography (60N, 1 g, MeOH/CHCl<sub>3</sub> = 10:90) to give diol **39** (83.0 mg, 88%) as a colorless oil: IR (ATR) 3416, 2976, 1665, 1479, 1416, 1365, 1297, 1250, 1162, 1058, 881 cm<sup>-1</sup>; <sup>1</sup>H NMR (400 MHz, CDCl<sub>3</sub>) δ 3.64–3.45 (m, 4H), 3.41–3.26

(m, 4H), 3.20–3.05 (m, 4H), 1.76 (tt,  $J = 7.3, 7.3$  Hz, 2H), 1.71–1.61 (m, 4H), 1.44 (brs, 18H);  $^{13}\text{C}$  NMR (100 MHz,  $\text{CDCl}_3$ )  $\delta$  156.6 ( $\times 2$ ), 80.1 ( $\times 2$ ), 58.3 ( $\times 2$ ), 44.9 ( $\times 2$ ), 42.7 ( $\times 2$ ), 30.7 ( $\times 2$ ), 28.4 ( $\times 6$ ), 27.7; HRMS (ESI, positive) calcd for  $\text{C}_{19}\text{H}_{39}\text{N}_2\text{O}_6$   $[(\text{M}+\text{H})^+]$  391.2803, found 391.2807.

**tert-Butyl** (3-((*tert*-butoxycarbonyl)(3-(trityloxy)propyl)amino)propyl)(3-hydroxypropyl)carbamate (**35**)

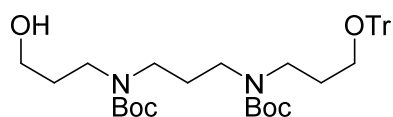

**35**

To a stirred solution of diol **39** (1.01 g, 2.59 mmol) in  $\text{CH}_2\text{Cl}_2$  (25 mL) at rt were added trityl chloride (1.08 g, 3.88 mmol),  $\text{Et}_3\text{N}$  (1.08 mL, 7.77 mmol), and DMAP (31.0 mg, 0.259 mmol). After 2 h, the mixture was poured into water (20 mL). Organic layer was separated and aqueous layer was extracted with  $\text{CH}_2\text{Cl}_2$  (5  $\times$  10 mL). Combined organic layer was washed with brine (2  $\times$  20 mL), dried over  $\text{Na}_2\text{SO}_4$ , and concentrated under reduced pressure. The residue was purified by silica gel column chromatography (SiOH-30 $\mu$  Premium, 16 g, MeOH/ $\text{CHCl}_3$  = 8:92) to give monotrityl ether **35** (831 mg, 51%) as a pale yellow oil. Unreacted substrate **39** (383 mg, 38%) was also recovered. For spectroscopic data of **35**, see above (**34** $\rightarrow$ **35**).

**tert-Butyl** (3-((*tert*-butoxycarbonyl)(3-(2-nitro-*N*-(1-(2-nitrophenyl)ethoxy)carbonyl)phenylsulfonamido)propyl)amino)propyl)(3-(2-nitro-*N*-(1-(2-nitrophenyl)ethoxy)carbonyl)phenylsulfonamido)propyl)carbamate (**36**)

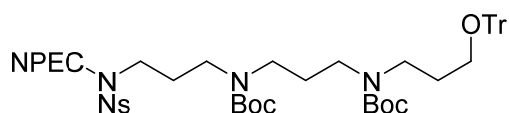

**36**

key 3-mer triamine building block

To a stirred solution of alcohol **35** (250 mg, 0.400 mmol) in benzene (1.0 mL) at rt were added a solution of NPEC-NHNs **24** (172 mg, 0.440 mmol) in benzene (3.0 mL),  $\text{PPh}_3$  (207 mg, 0.790 mmol), and a solution of diethyl azodicarboxylate in toluene (2.2 M, 0.359 mL, 0.790 mmol).

After 2 h, the mixture was concentrated under reduced pressure. The residue was purified by silica gel column chromatography (60N, 23 g, acetone/CHCl<sub>3</sub> = 5:95) to give 3-mer triamine key building block **36** (314 mg, 78%) as a pale yellow oil: IR (ATR) 2977, 1734, 1684, 1544, 1417, 1365, 1265, 1170, 853, 731, 705 cm<sup>-1</sup>; <sup>1</sup>H NMR (400 MHz, CDCl<sub>3</sub>) δ 8.28 (m, 1H), 7.92 (d, *J* = 8.1 Hz, 1H), 7.77–7.65 (m, 5H), 7.61 (m, 1H), 7.43–7.37 (m, 5H), 7.30–7.16 (m, 10H), 6.27 (q, *J* = 6.2 Hz, 1H), 3.88–3.78 (m, 2H), 3.29–3.19 (m, 4H), 3.18–3.00 (m, 6H), 2.02–1.87 (m, 2H), 1.87–1.75 (m, 2H), 1.75–1.64 (m, 2H), 1.57–1.48 (m, 3H), 1.43 (s, 9H), 1.39 (s, 9H); <sup>13</sup>C NMR (100 MHz, C<sub>6</sub>D<sub>6</sub>) δ 155.4 (×2), 151.1, 148.1, 147.7 (×2), 144.9 (×3), 137.0, 134.1 (×4), 132.9, 131.2, 129.1 (×6), 128.5 (×6), 127.2 (×3), 124.5, 123.9, 87.0, 79.2, 78.8, 72.2, 61.8, 46.6, 45.0 (×4), 29.9 (×2), 28.5 (×7), 21.5; HRMS (ESI, positive) calcd for C<sub>53</sub>H<sub>64</sub>N<sub>5</sub>O<sub>13</sub>S [(M+H)<sup>+</sup>] 1010.4216, found 1010.4216.

**1-(2-Nitrophenyl)ethyl (3-((tert-butoxycarbonyl)(3-((tert-butoxycarbonyl)(3-hydroxypropyl)amino)propyl)amino)propyl)((2-nitrophenyl)sulfonyl)carbamate (40)**

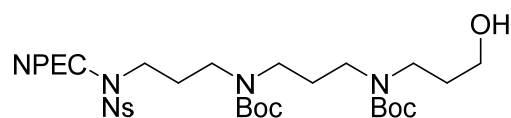**40**

A solution of trimer Tr ether **36** (148 mg, 0.146 mmol) in 2,2,2-trifluoroethanol (1.46 mL) was stirred at reflux. After 41 h, the mixture was concentrated under reduced pressure. The residue was purified by silica gel column chromatography (60N, 5 g, EtOAc/hexane = 8:2) to give trimer alcohol **40** (99.0 mg, 88%) as a pale yellow oil: IR (ATR) 3423, 2977, 1736, 1683, 1544, 1478, 1419, 1365, 1265, 1166, 1057 cm<sup>-1</sup>; <sup>1</sup>H NMR (400 MHz, C<sub>6</sub>D<sub>6</sub>) δ 8.10 (d, *J* = 7.4 Hz, 1H), 7.62–7.28 (m, 2H), 7.16 (m, 1H), 6.85 (m, 1H), 6.75–6.51 (m, 3H), 6.29 (q, *J* = 6.3 Hz, 1H), 4.15–3.96 (m, 2H), 3.67–3.45 (m, 2H), 3.39–2.80 (m, 8H), 2.15–1.88 (m, 2H), 1.78–1.46 (m, 13H), 1.45–1.38 (m, 9H), 1.29–1.18 (m, 3H); <sup>13</sup>C NMR (100 MHz, C<sub>6</sub>D<sub>6</sub>) δ 156.9, 155.4, 151.0, 148.1, 147.7, 136.8, 134.2, 133.9, 132.8 (×2), 131.3, 128.7, 126.8, 128.5, 124.6, 124.1, 79.7, 79.4, 72.2, 58.4, 46.6, 45.2, 44.8 (×2), 43.1, 31.4, 30.0, 28.5 (×3), 28.4 (×3), 21.4; HRMS (ESI, positive) calcd

for  $C_{34}H_{49}N_5O_{13}SNa$  [(M+Na)<sup>+</sup>] 790.2940, found 790.2923.

**tert-Butyl** (3-((*tert*-butoxycarbonyl)(3-(trityloxy)propyl)amino)propyl)(3-(2-nitrophenylsulfonamido)propyl)carbamate (**41**)

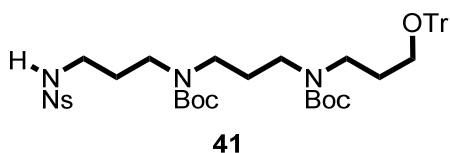

**Reaction by the LED light (365 nm, 3 W).** A stirred solution of NPEC-*N*-Ns amine **36** (7.5 mg, 0.0075 mmol) in MeOH (2.50 mL) at rt was irradiated with the LED light (365 nm, 3 W). After 20 min, the mixture was concentrated under reduced pressure. The residue was purified by silica gel column chromatography (60N, 0.1 g, EtOAc/PhH = 1:9) to give des-*N*-NPEC product **41** (6.1 mg, 99%) as a pale yellow oil.

**Reaction by High pressure Hg lamp (435 W).** A stirred solution of trimer *N*-NPEC-*N*-Ns amine **36** (93.0 mg, 0.0920 mmol) in MeOH (40 mL) at rt with Ar bubbling was irradiated with high-pressure Hg lamp (435 W). After 30 min, the mixture was concentrated under reduced pressure. The residue was purified by silica gel column chromatography (SiOH-30 $\mu$  Premium, 16 g, EtOAc/hexane = 1:1) to give des-*N*-NPEC product **41** (65.0 mg, 94%) as a yellow oil.

Data for des-*N*-NPEC product **41**: IR (ATR) 3242, 2978, 1682, 1542, 1478, 1417, 1363, 1265, 1164, 1069, 853  $cm^{-1}$ ;  $^1H$  NMR (400 MHz,  $C_6D_6$ )  $\delta$  7.84 (d,  $J$  = 7.7 Hz, 1H), 7.58–7.50 (m, 6H), 7.14–7.09 (m, 6H), 7.09–7.00 (m, 3H), 6.93 (d,  $J$  = 8.0 Hz, 1H), 6.67 (m, 1H), 6.52 (m, 1H), 3.41–2.72 (m, 12H), 1.92–1.70 (m, 2H), 1.65–1.48 (m, 2H), 1.46–1.42 (m, 9H), 1.41–1.29 (m, 11H);  $^{13}C$  NMR (100 MHz,  $C_6D_6$ )  $\delta$  155.3 ( $\times 2$ ), 148.5, 144.8 ( $\times 3$ ), 132.5, 131.7 ( $\times 2$ ), 130.6, 129.0 ( $\times 6$ ), 128.5 ( $\times 6$ ), 127.2 ( $\times 3$ ), 124.6, 87.0, 79.6, 79.0, 61.7, 45.1 ( $\times 3$ ), 43.7, 40.8, 29.9, 29.1, 28.5 ( $\times 3$ ), 28.4 ( $\times 3$ ), 28.0; HRMS (ESI, positive) calcd for  $C_{44}H_{57}N_4O_9S$  [(M+H)<sup>+</sup>] 817.3841, found 817.3835.

**tert-Butyl** (9,13-bis(*tert*-butoxycarbonyl)-2-(2-nitrophenyl)-5,17-

**bis((2-nitrophenyl)sulfonyl)-4-oxo-3-oxa-5,9,13,17-tetraazaicosan-20-yl)(3-((tert-butoxycarbonyl)(3-(trityloxy)propyl)amino)propyl)carbamate (42)**

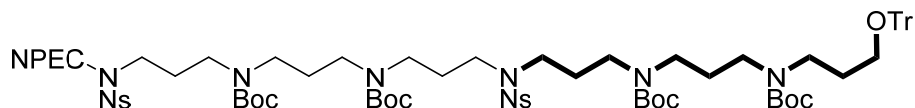

**42** (6-mer polyamine)

To a stirred solution of trimer alcohol **40** (404 mg, 0.526 mmol) and trimer *N*-Ns amine **41** (405 mg, 0.533 mmol) in benzene (5.30 mL) at rt were added PPh<sub>3</sub> (276 mg, 1.05 mmol) and a solution of diethyl azodicarboxylate in toluene (2.2 M, 0.478 mL, 1.05 mmol). After 2 h, the mixture was concentrated under reduced pressure. The residue was purified by silica gel column chromatography (SiOH-30 $\mu$  Premium, 40 g, EtOAc/hexane = 6:4) to give hexamer polyamine **42** (675 mg, 82%) as a pale yellow oil: IR (ATR) 2977, 1684, 1544, 1478, 1417, 1365, 1265, 1157, 1058, 853, 733 cm<sup>-1</sup>; <sup>1</sup>H NMR (400 MHz, C<sub>6</sub>D<sub>6</sub>)  $\delta$  8.14 (m, 1H), 7.84 (s, 1H), 7.62–7.51 (m, 5H), 7.48–7.38 (m, 2H), 7.27–7.11 (m, 7H), 7.10–7.02 (m, 3H), 6.92–6.81 (m, 2H), 6.77 (d, *J* = 7.2 Hz, 1H), 6.73–6.55 (m, 4H), 6.49 (m, 1H), 6.31 (m, 1H), 4.16–3.96 (m, 4H), 3.48–2.85 (m, 20H), 2.21–1.95 (m, 2H), 1.95–1.59 (m, 10H), 1.59–1.39 (m, 36H), 1.25 (d, *J* = 5.9 Hz, 3H); <sup>13</sup>C NMR (100 MHz, C<sub>6</sub>D<sub>6</sub>)  $\delta$  155.4 ( $\times$ 4), 151.1, 148.4, 148.1, 147.7, 144.9, 136.9, 134.0 ( $\times$ 2), 133.8, 133.0, 132.8, 131.2, 131.2, 131.0 ( $\times$ 2), 129.1 ( $\times$ 6), 128.5 ( $\times$ 7), 127.2 ( $\times$ 3), 124.6 ( $\times$ 2), 123.9 ( $\times$ 4), 87.0, 79.3, 79.2 ( $\times$ 2), 78.8, 72.2, 61.8, 46.6, 45.1 ( $\times$ 8), 44.9 ( $\times$ 2), 30.1 ( $\times$ 2), 28.5 ( $\times$ 12), 27.6 ( $\times$ 4), 21.5; HRMS (ESI, positive) calcd for C<sub>78</sub>H<sub>103</sub>N<sub>9</sub>O<sub>21</sub>S<sub>2</sub>Na [(M+Na)<sup>+</sup>] 1588.6602, found 1588.6619.

**tert-Butyl (9,13-bis(tert-butoxycarbonyl)-2-(2-nitrophenyl)-5,17-bis((2-nitrophenyl)sulfonyl)-4-oxo-3-oxa-5,9,13,17-tetraazaicosan-20-yl)(3-((tert-butoxycarbonyl)(3-hydroxypropyl)amino)propyl)carbamate (43)**

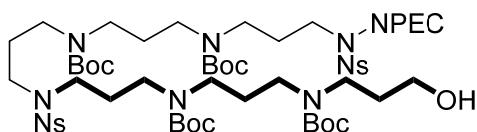

**43**

A solution of hexamer Tr ether **42** (43.7 mg, 0.0279 mmol) in 2,2,2-trifluoroethanol (1.80 mL) was stirred at reflux. After 6 h, the mixture was concentrated under reduced pressure. The residue was purified by recycling preparative HPLC to give hexamer alcohol **43** (36.0 mg, 97%) as a pale yellow oil: IR (ATR) 2978, 2937, 1738, 1687, 1546, 1477, 1418, 1366, 1253, 1165, 1059  $\text{cm}^{-1}$ ;  $^1\text{H}$  NMR (400 MHz,  $\text{C}_6\text{D}_6$ )  $\delta$  8.13 (m, 1H), 7.81 (m, 1H), 7.42 (d,  $J = 8.2$  Hz, 1H), 6.91–6.79 (m, 3H), 6.76 (m, 1H), 6.71–6.55 (m, 4H), 6.47 (m, 1H), 6.31 (q,  $J = 6.2$  Hz, 1H), 4.15–4.00 (m, 2H), 3.67–3.47 (m, 2H), 3.44–2.86 (m, 21H), 2.19–1.92 (m, 2H), 1.92–1.59 (m, 10H), 1.59–1.38 (m, 36H), 1.24 (d,  $J = 6.2$  Hz, 3H);  $^{13}\text{C}$  NMR (100 MHz,  $\text{C}_6\text{D}_6$ )  $\delta$  155.4 ( $\times 3$ ), 155.4 ( $\times 2$ ), 151.1, 148.4, 148.1, 147.8 ( $\times 2$ ), 136.9, 134.1, 134.0 ( $\times 2$ ), 133.7, 133.1, 132.9, 131.2, 131.2, 130.9, 124.6, 124.0, 123.9, 79.3 ( $\times 4$ ), 72.3, 46.6, 45.3 ( $\times 3$ ), 44.9 ( $\times 4$ ), 44.8 ( $\times 3$ ), 43.2, 31.4, 30.0, 28.5 ( $\times 9$ ), 28.4 ( $\times 3$ ), 27.9 ( $\times 4$ ), 21.5; HRMS (ESI, positive) calcd for  $\text{C}_{59}\text{H}_{89}\text{N}_9\text{O}_{21}\text{S}_2\text{Na}$  [(M+Na) $^+$ ] 1346.5507, found 1346.5495.

**tert-Butyl** (3-((*tert*-butoxycarbonyl)(3-(trityloxy)propyl)amino)propyl)(9-(*tert*-butoxycarbonyl)-2,2-dimethyl-13-((2-nitrophenyl)sulfonyl)-5-(3-(2-nitrophenylsulfonamido)propyl)-4-oxo-3-oxa-5,9,13-triazahexadecan-16-yl)carbamate (**44**)

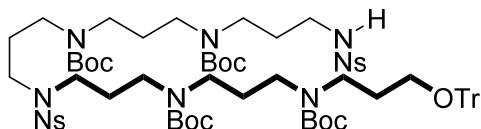**44**

**Reaction by the LED light (365 nm, 3 W).** A stirred solution of hexamer *N*-NPEC-*N*-Ns polyamine **42** (13.3 mg, 0.00847 mmol) in MeOH (0.800 mL) at rt was irradiated with the LED light (365 nm, 3 W). After 20 min, the mixture was concentrated under reduced pressure. The residue was purified by silica gel column chromatography (60N, 0.3 g, EtOAc/PhH = 2:3) to give hexamer *N*-Ns amine **44** (11.3 mg, 97%) as a pale yellow oil.

**Reaction by High pressure Hg lamp (435 W).** A stirred solution of hexamer *N*-NPEC-*N*-Ns polyamine **42** (7.0 mg, 0.0045 mmol) in MeOH (8.0

mL) at rt with Ar bubbling was irradiated with high-pressure Hg lamp (435 W). After 10 min, the mixture was concentrated under reduced pressure. The residue was purified by silica gel column chromatography (60N, 600 mg, EtOAc/hexane = 7:3) to give hexamer *N*-Ns amine **44** (4.9 mg, 81%) as a yellow oil: IR (ATR) 2976, 2930, 1686, 1545, 1479, 1418, 1366, 1252, 1164, 1070, 748  $\text{cm}^{-1}$ ;  $^1\text{H}$  NMR (400 MHz,  $\text{C}_6\text{D}_6$ )  $\delta$  7.90–7.77 (m, 2H), 7.60–7.51 (m, 6H), 7.22–7.10 (m, 6H), 7.10–7.02 (m, 3H), 7.00–6.96 (m, 1H), 6.88–6.78 (m, 2H), 6.77–6.61 (m, 3H), 6.55 (m, 1H), 4.10–3.94 (m, 2H), 3.45–2.75 (m, 22H), 1.95–1.56 (m, 12H), 1.52–1.37 (m, 36H);  $^{13}\text{C}$  NMR (100 MHz,  $\text{C}_6\text{D}_6$ )  $\delta$  155.4 ( $\times 4$ ), 148.5, 148.4, 144.8 ( $\times 4$ ), 133.6, 133.1, 132.7, 131.8, 131.2, 130.9, 130.7, 129.1 ( $\times 6$ ), 128.5 ( $\times 6$ ), 127.2 ( $\times 3$ ), 124.7, 123.9, 87.0, 79.6, 79.3, 79.2, 78.9, 61.8, 45.2 ( $\times 9$ ), 44.0, 41.0, 29.2, 28.5 ( $\times 9$ ), 28.4 ( $\times 3$ ), 28.0 ( $\times 4$ ), 27.7; HRMS (ESI, positive) calcd for  $\text{C}_{69}\text{H}_{96}\text{N}_8\text{O}_{17}\text{S}_2\text{Na}$  [(M+Na) $^+$ ] 1395.6227, found 1395.6227.

**tert-Butyl** (6,10-bis(*tert*-butoxycarbonyl)-14-((2-nitrophenyl)sulfonyl)-1,1,1-triphenyl-2-oxa-6,10,14-triazaheptadecan-17-yl)(9,13,21,25,33-pentakis(*tert*-butoxycarbonyl)-2-(2-nitrophenyl)-17-((2-nitrophenyl)sulfonyl)-5,29-bis((4-nitrophenyl)sulfonyl)-4-oxo-3-oxa-5,9,13,17,21,25,29,33-octaazahexatriacontan-36-yl)carbamate (**45**)

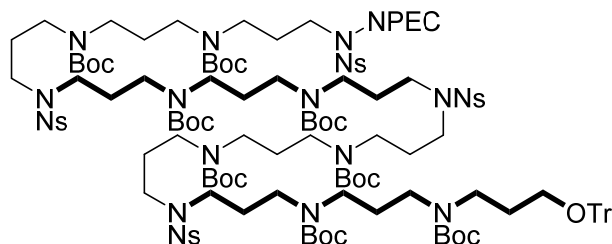

**45** (12-mer polyamine)

To a stirred solution of hexamer alcohol **43** (16.0 mg, 0.0120 mmol) and hexamer *N*-Ns amine **44** (17.0 mg, 0.0124 mmol) in benzene (0.600 mL) at rt were added  $\text{PPh}_3$  (7.0 mg, 0.024 mmol) and a solution of diethyl azodicarboxylate in toluene (2.2 M, 0.011 mL, 0.024 mmol). After 5 h, the mixture was concentrated under reduced pressure. The residue was purified by silica gel column chromatography (60N, 2 g, EtOAc/hexane = 9:1) to give 12-mer polyamine **45** (25.0 mg, 78%) as a



pale yellow oil: IR (ATR) 2974, 1683, 1543, 1477, 1416, 1364, 1248, 1154, 1058, 852, 734  $\text{cm}^{-1}$ ;  $^1\text{H}$  NMR (400 MHz,  $\text{C}_6\text{D}_6$ )  $\delta$  8.14 (m, 1H), 7.94–7.76 (m, 3H), 7.60–7.51 (m, 5H), 7.48–7.39 (m, 2H), 7.27–7.11 (m, 5H), 7.10–7.02 (m, 3H), 7.02–6.84 (m, 8H), 6.84–6.71 (m, 4H), 6.71–6.58 (m, 3H), 6.51 (m, 1H), 6.31 (m, 1H), 4.15–3.96 (m, 4H), 3.51–2.83 (m, 44H), 2.19–1.96 (m, 2H), 1.95–1.61 (m, 22H), 1.61–1.39 (m, 72H), 1.29–1.22 (m, 3H);  $^{13}\text{C}$  NMR (100 MHz,  $\text{C}_6\text{D}_6$ )  $\delta$  155.4 ( $\times 8$ ), 151.1, 148.4 ( $\times 4$ ), 148.1 ( $\times 2$ ), 147.8 ( $\times 3$ ), 144.9 ( $\times 3$ ), 136.9, 134.2 ( $\times 2$ ), 133.9 ( $\times 2$ ), 133.7 ( $\times 2$ ), 133.2 ( $\times 2$ ), 132.9, 131.3 ( $\times 4$ ), 130.9 ( $\times 2$ ), 129.1 ( $\times 6$ ), 128.5 ( $\times 6$ ), 127.2 ( $\times 3$ ), 124.6, 124.0 ( $\times 4$ ), 87.0, 79.2 ( $\times 7$ ), 78.9, 72.3, 61.8, 46.6, 45.4 ( $\times 16$ ), 44.9 ( $\times 6$ ), 30.1, 28.6 ( $\times 25$ ), 27.8 ( $\times 10$ ), 21.5; HRMS (ESI, positive) calcd for  $\text{C}_{128}\text{H}_{183}\text{N}_{17}\text{O}_{37}\text{S}_4\text{Na}_2$  [ $\text{M}+2\text{Na}$ ] $^{2+}$  1362.0814, found 1362.0880.

**tert-Butyl (9,13,21-tris(tert-butoxycarbonyl)-2-(2-nitrophenyl)-17-((2-nitrophenyl)sulfonyl)-5-((4-nitrophenyl)sulfonyl)-4-oxo-3-oxa-5,9,13,17,21-pentaazatetracosan-24-yl)(9,17,21-tris(tert-butoxycarbonyl)-5-(3-hydroxypropyl)-2,2-dimethyl-13-((2-nitrophenyl)sulfonyl)-25-((4-nitrophenyl)sulfonyl)-4-oxo-3-oxa-5,9,13,17,21,25-hexaazaoctacosan-28-yl)carbamate (2b)**

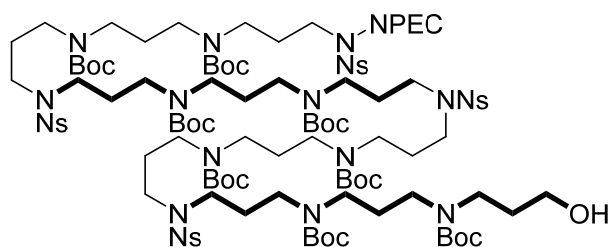

**2b**  
12-mer LCPA subunit

A solution of 12-mer Tr ether **45** (25.0 mg, 0.00932 mmol) in 2,2,2-trifluoroethanol (0.932 mL) was stirred at rt. After 18 h, the mixture was concentrated under reduced pressure. The residue was purified by silica gel column chromatography (60N, 600 mg, EtOAc/hexane = 9:1) to give 12-mer alcohol **2b** (110 mg, 40%) as a pale yellow oil. Unreacted substrate **45** (88.0 mg, 56%) was also recovered.

Data for 12-mer alcohol **2b**: IR (ATR) 2927, 1682, 1544, 1477, 1417,

1365, 1250, 1156, 1058, 852, 732  $\text{cm}^{-1}$ ;  $^1\text{H}$  NMR (400 MHz,  $\text{C}_6\text{D}_6$ )  $\delta$  8.14 (m, 1H), 7.94-7.75 (m, 4H), 7.45 (d,  $J = 8.2$  Hz, 1H), 7.04-6.87 (m, 7H), 6.87-6.73 (m, 4H), 6.73-6.61 (m, 2H), 6.55 (m, 1H), 6.31 (m, 1H), 4.14-3.99 (m, 2H), 3.67-3.50 (m, 2H), 3.48-2.90 (m, 44H), 2.18-1.95 (m, 2H), 1.92-1.62 (m, 22H), 1.55-1.46 (m, 63H), 1.45 (s, 9H), 1.26 (d,  $J = 6.1$  Hz, 3H);  $^{13}\text{C}$  NMR (100 MHz,  $\text{C}_6\text{D}_6$ )  $\delta$  155.4 ( $\times 9$ ), 148.4 ( $\times 6$ ), 148.1 ( $\times 3$ ), 147.8, 134.2 ( $\times 2$ ), 133.9 ( $\times 2$ ), 133.6 ( $\times 2$ ), 133.2 ( $\times 3$ ), 131.3 ( $\times 4$ ), 130.9 ( $\times 2$ ), 124.6, 124.0 ( $\times 4$ ), 79.2 ( $\times 8$ ), 72.3, 45.3 ( $\times 16$ ), 44.9 ( $\times 8$ ), 28.6 ( $\times 24$ ), 28.5 ( $\times 12$ ), 21.5; HRMS (ESI, positive) calcd for  $\text{C}_{109}\text{H}_{169}\text{N}_{17}\text{O}_{37}\text{S}_4\text{Na}_2$   $[(\text{M}+2\text{Na})^{2+}]$  1241.0266, found 1241.0257.

## [REFERENCES AND NOTES]

1. Y. Hidai, T. Kan and T. Fukuyama, *Chem. Pharm. Bull.*, 2000, **48**, 1570-1576.
2. F. Thuaud, F. Rohrbacher, A. Zwickly and J. W. Bode, *Helv. Chim. Acta*, 2016, **99**, 868-894.
3. (a) Y. Kikuchi, J. Nakanishi, T. Shimizu, H. Nakayama, S. Inoue, K. Yamaguchi, H. Iwai, Y. Yoshida, Y. Horiike, T. Takarada and M. Maeda, *Langmuir*, 2008, **24**, 13084-13095; (b) Y. Kawada, T. Kodama, K. Miyashita, T. Imanishi and S. Obika, *Org. Biomol. Chem.*, 2012, **10**, 5102-5108.
4. T. Fukuyama, M. Cheung and T. Kan, *Synlett*, 1999, 1301-1303.
5. M. R. Heinrich, Y. Kashman, P. Spiteller and W. Steglich, *Tetrahedron*, 2001, **57**, 9973-9978.
6. T. Niittymäki, U. Kaukinen, P. Virta, S. Mikkola and H. Lönnberg, *Bioconjugate Chem.*, 2004, **15**, 174-184.

[NMR SPECTRA OF ALL NEW COMPOUNDS]



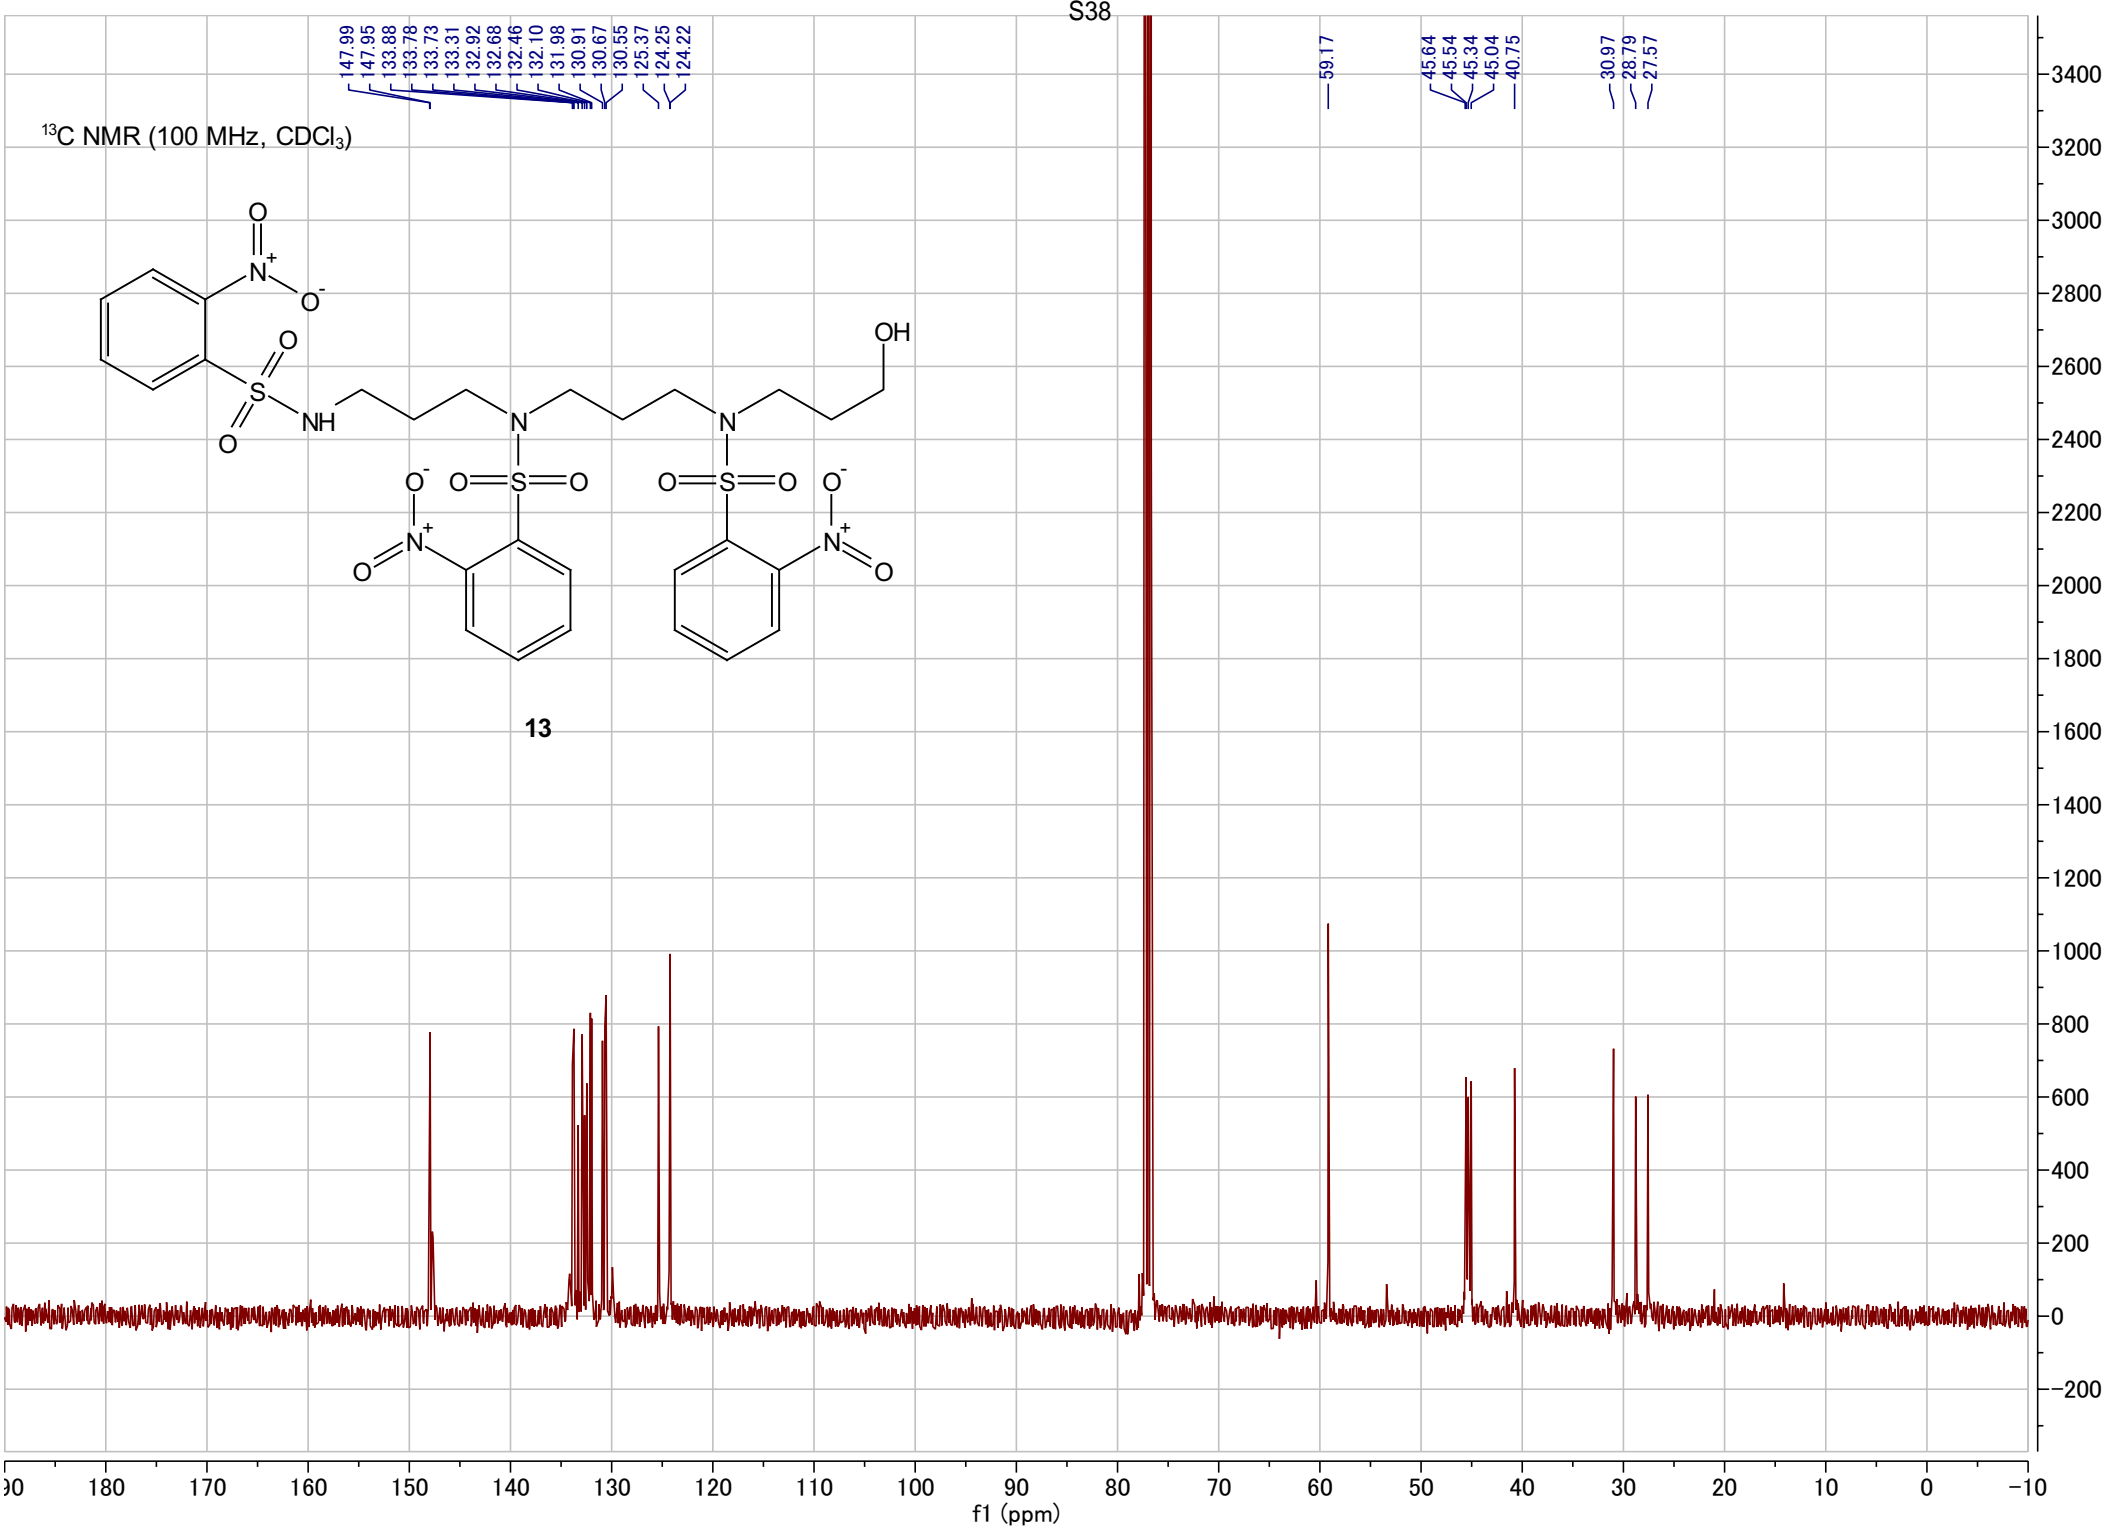

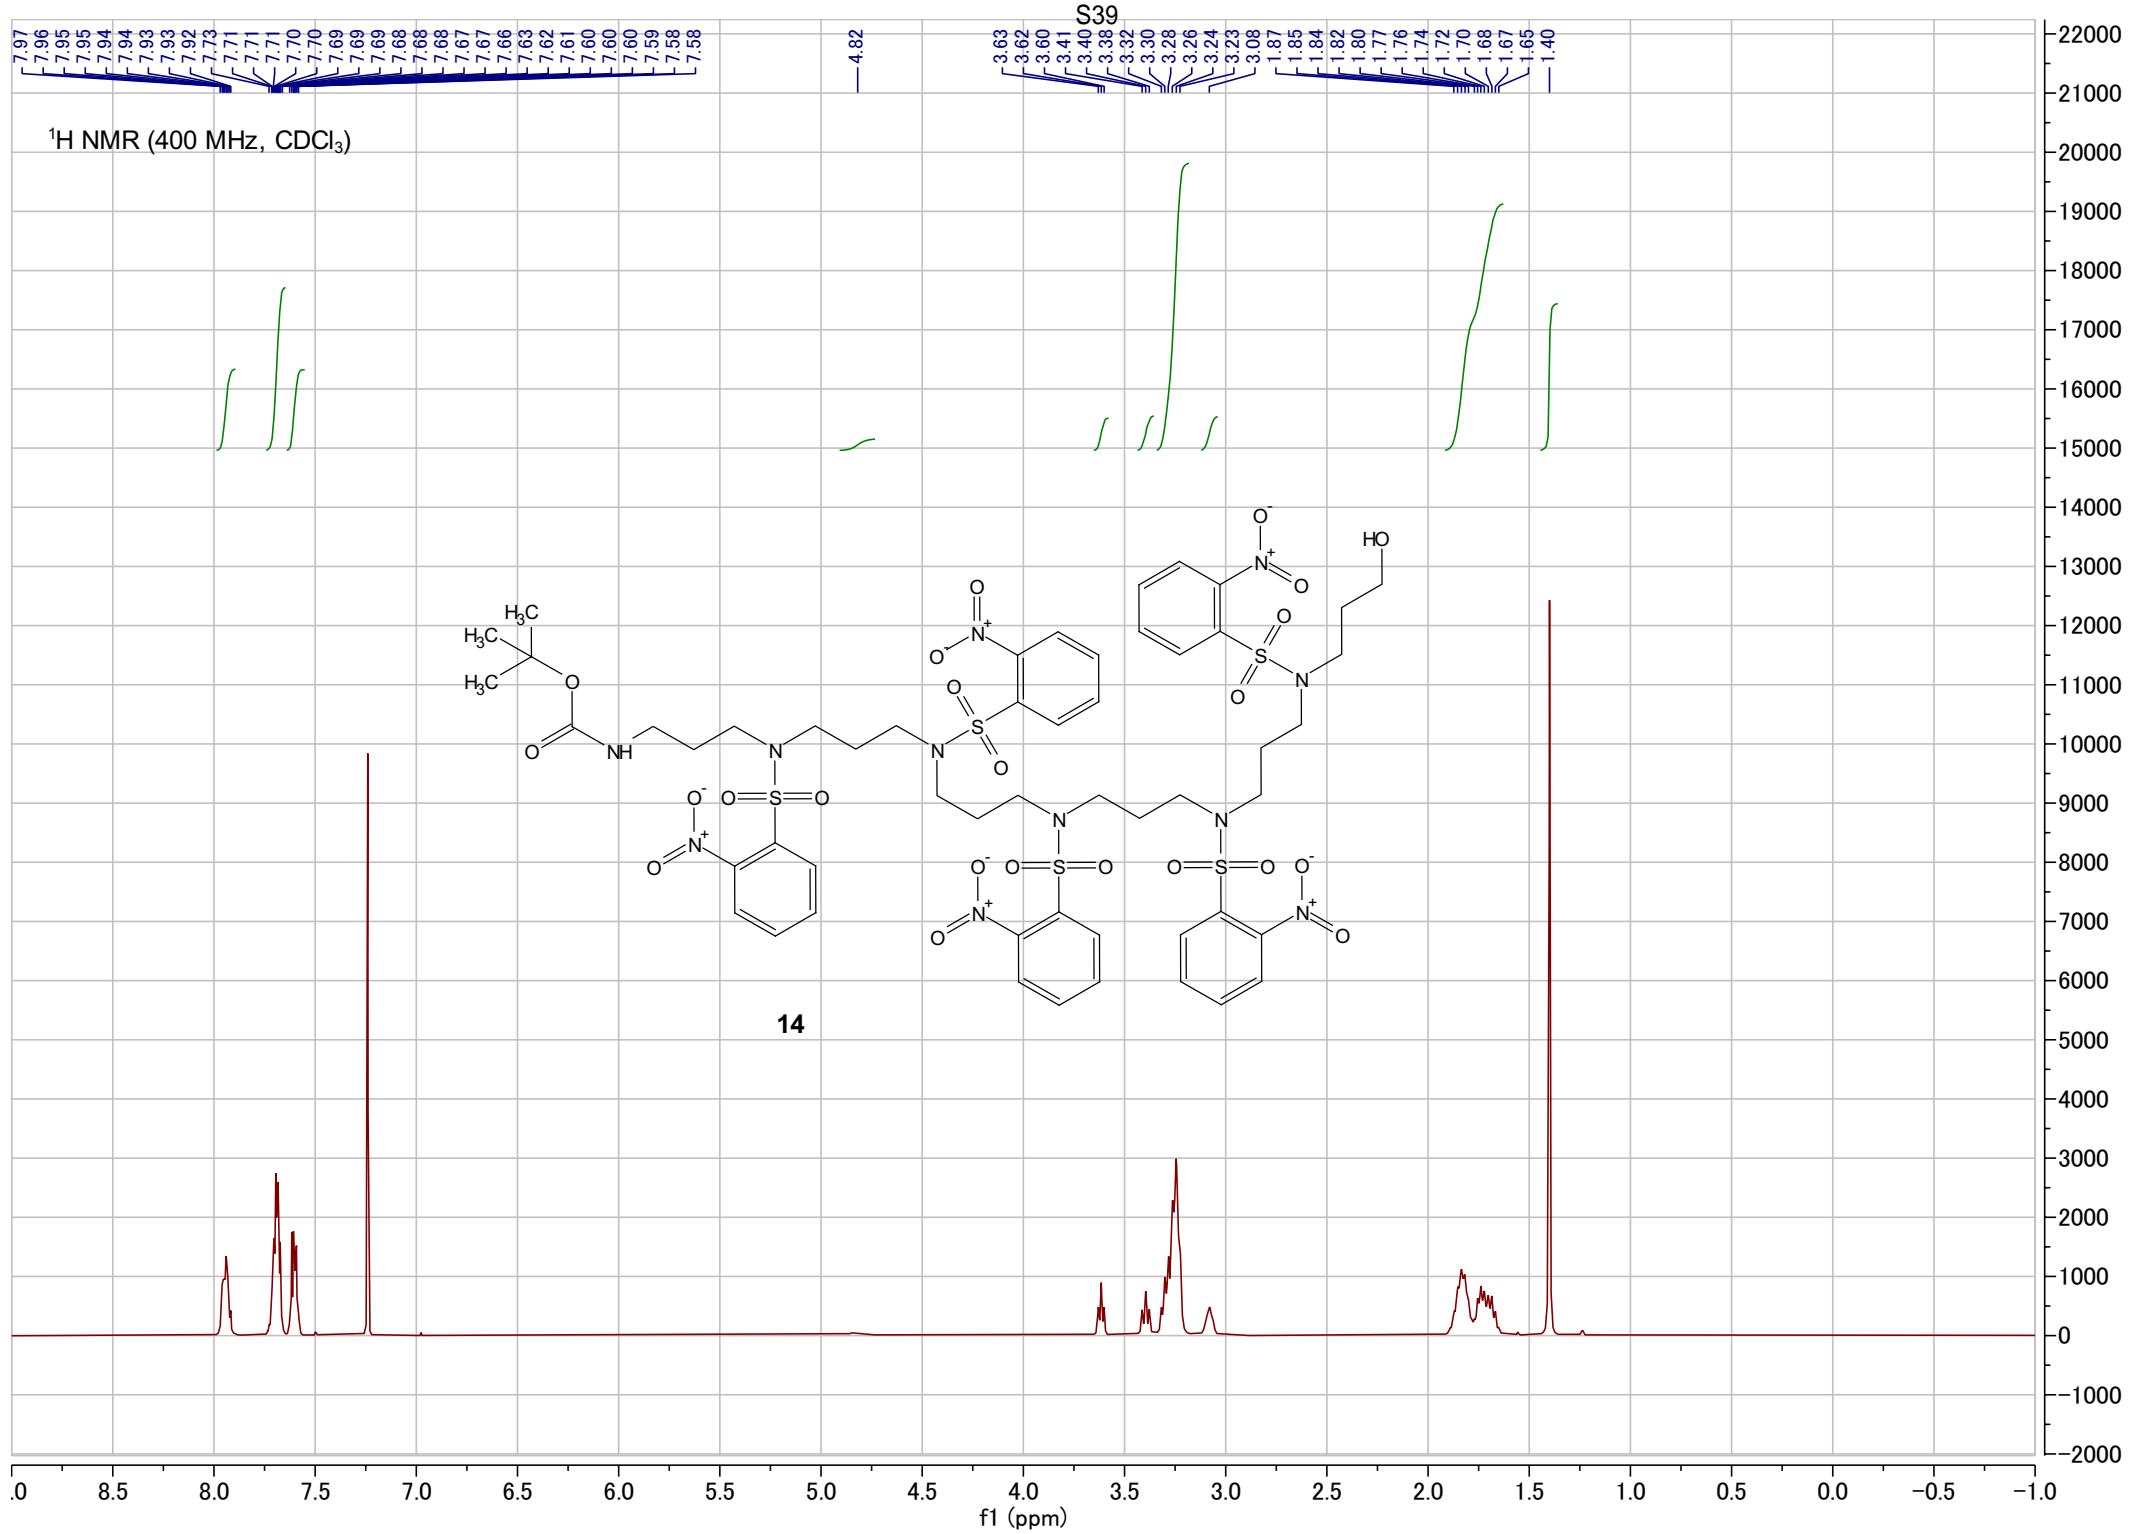

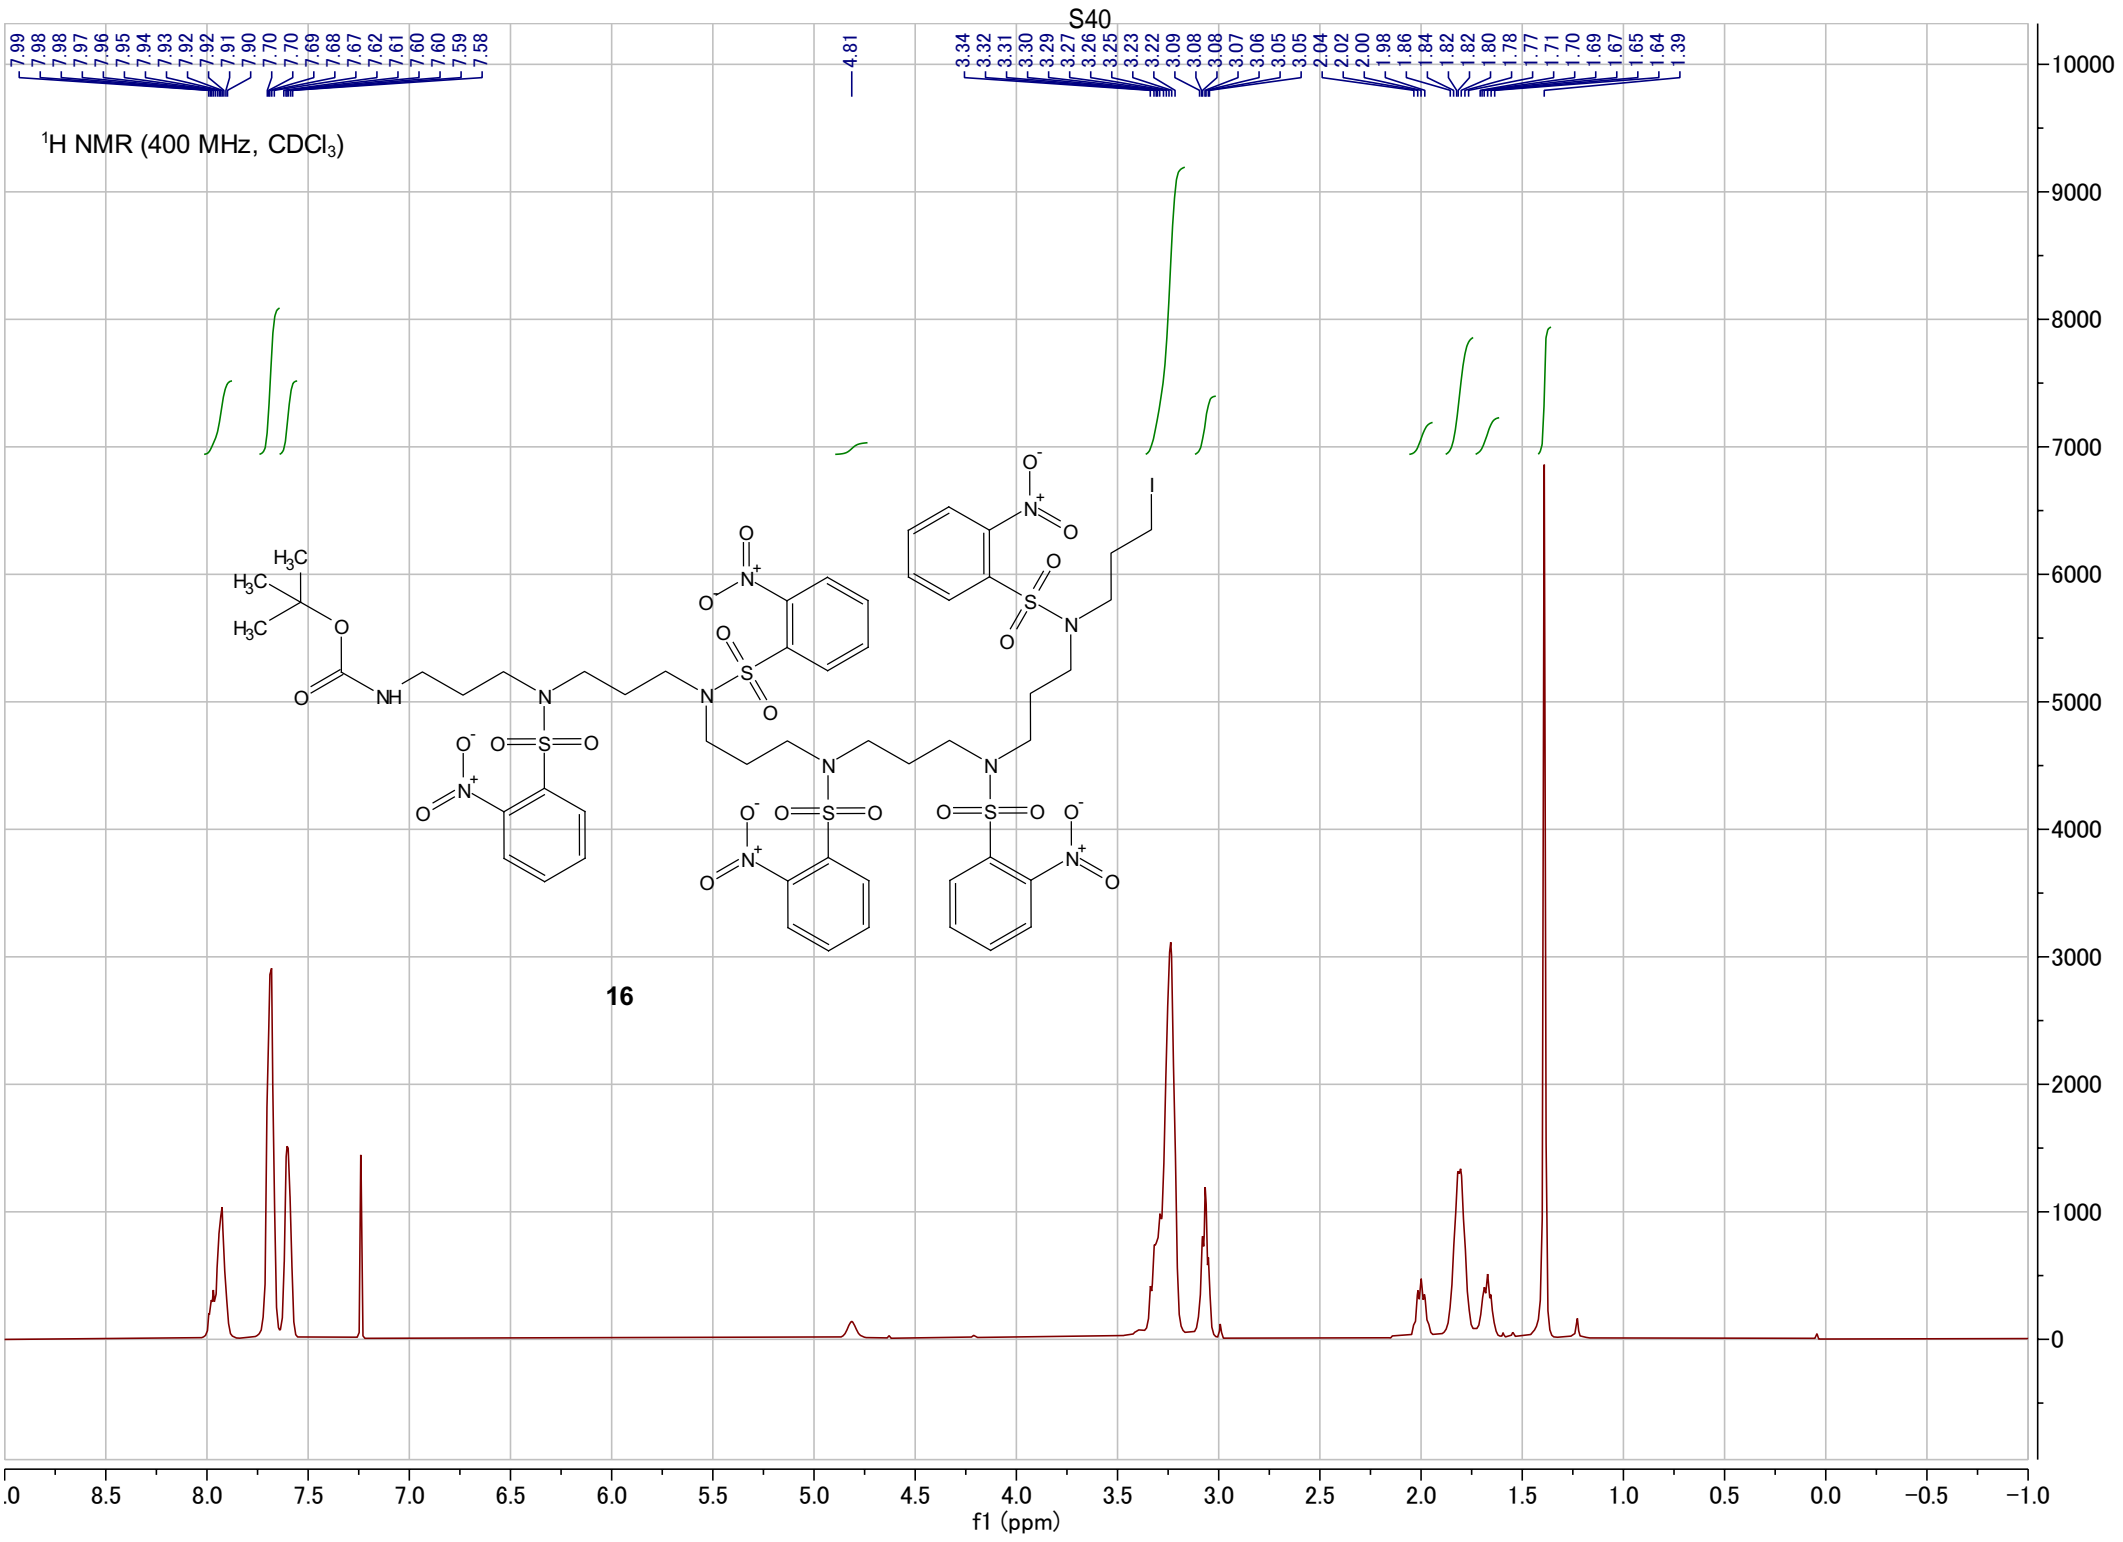



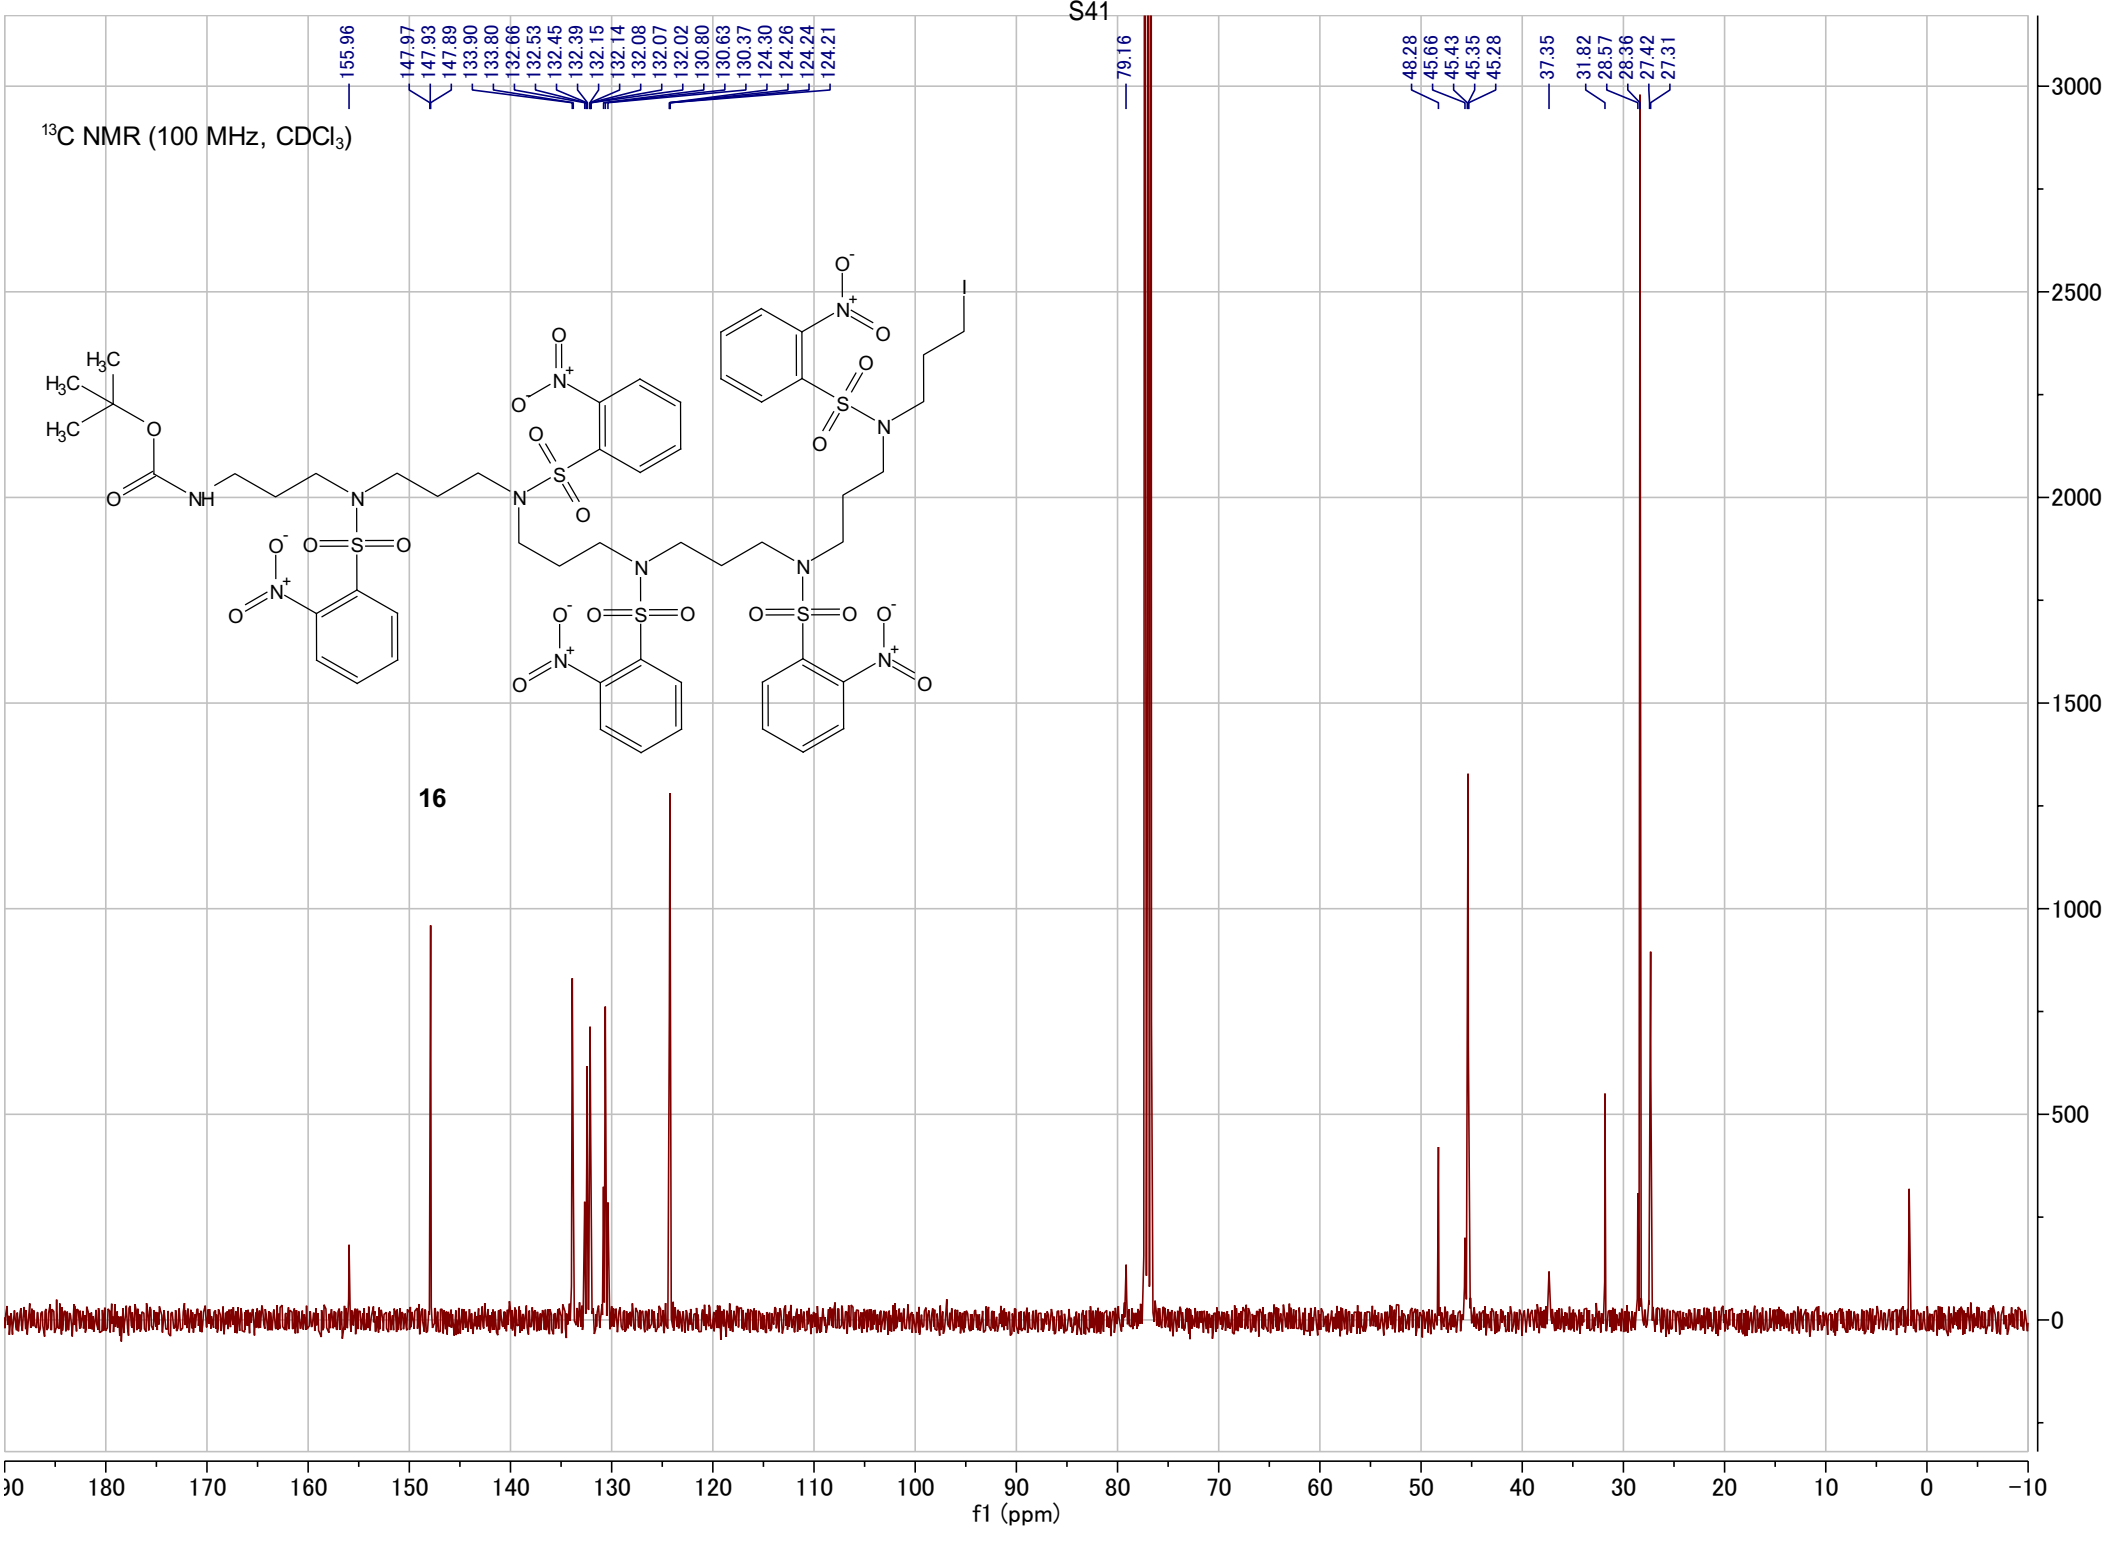

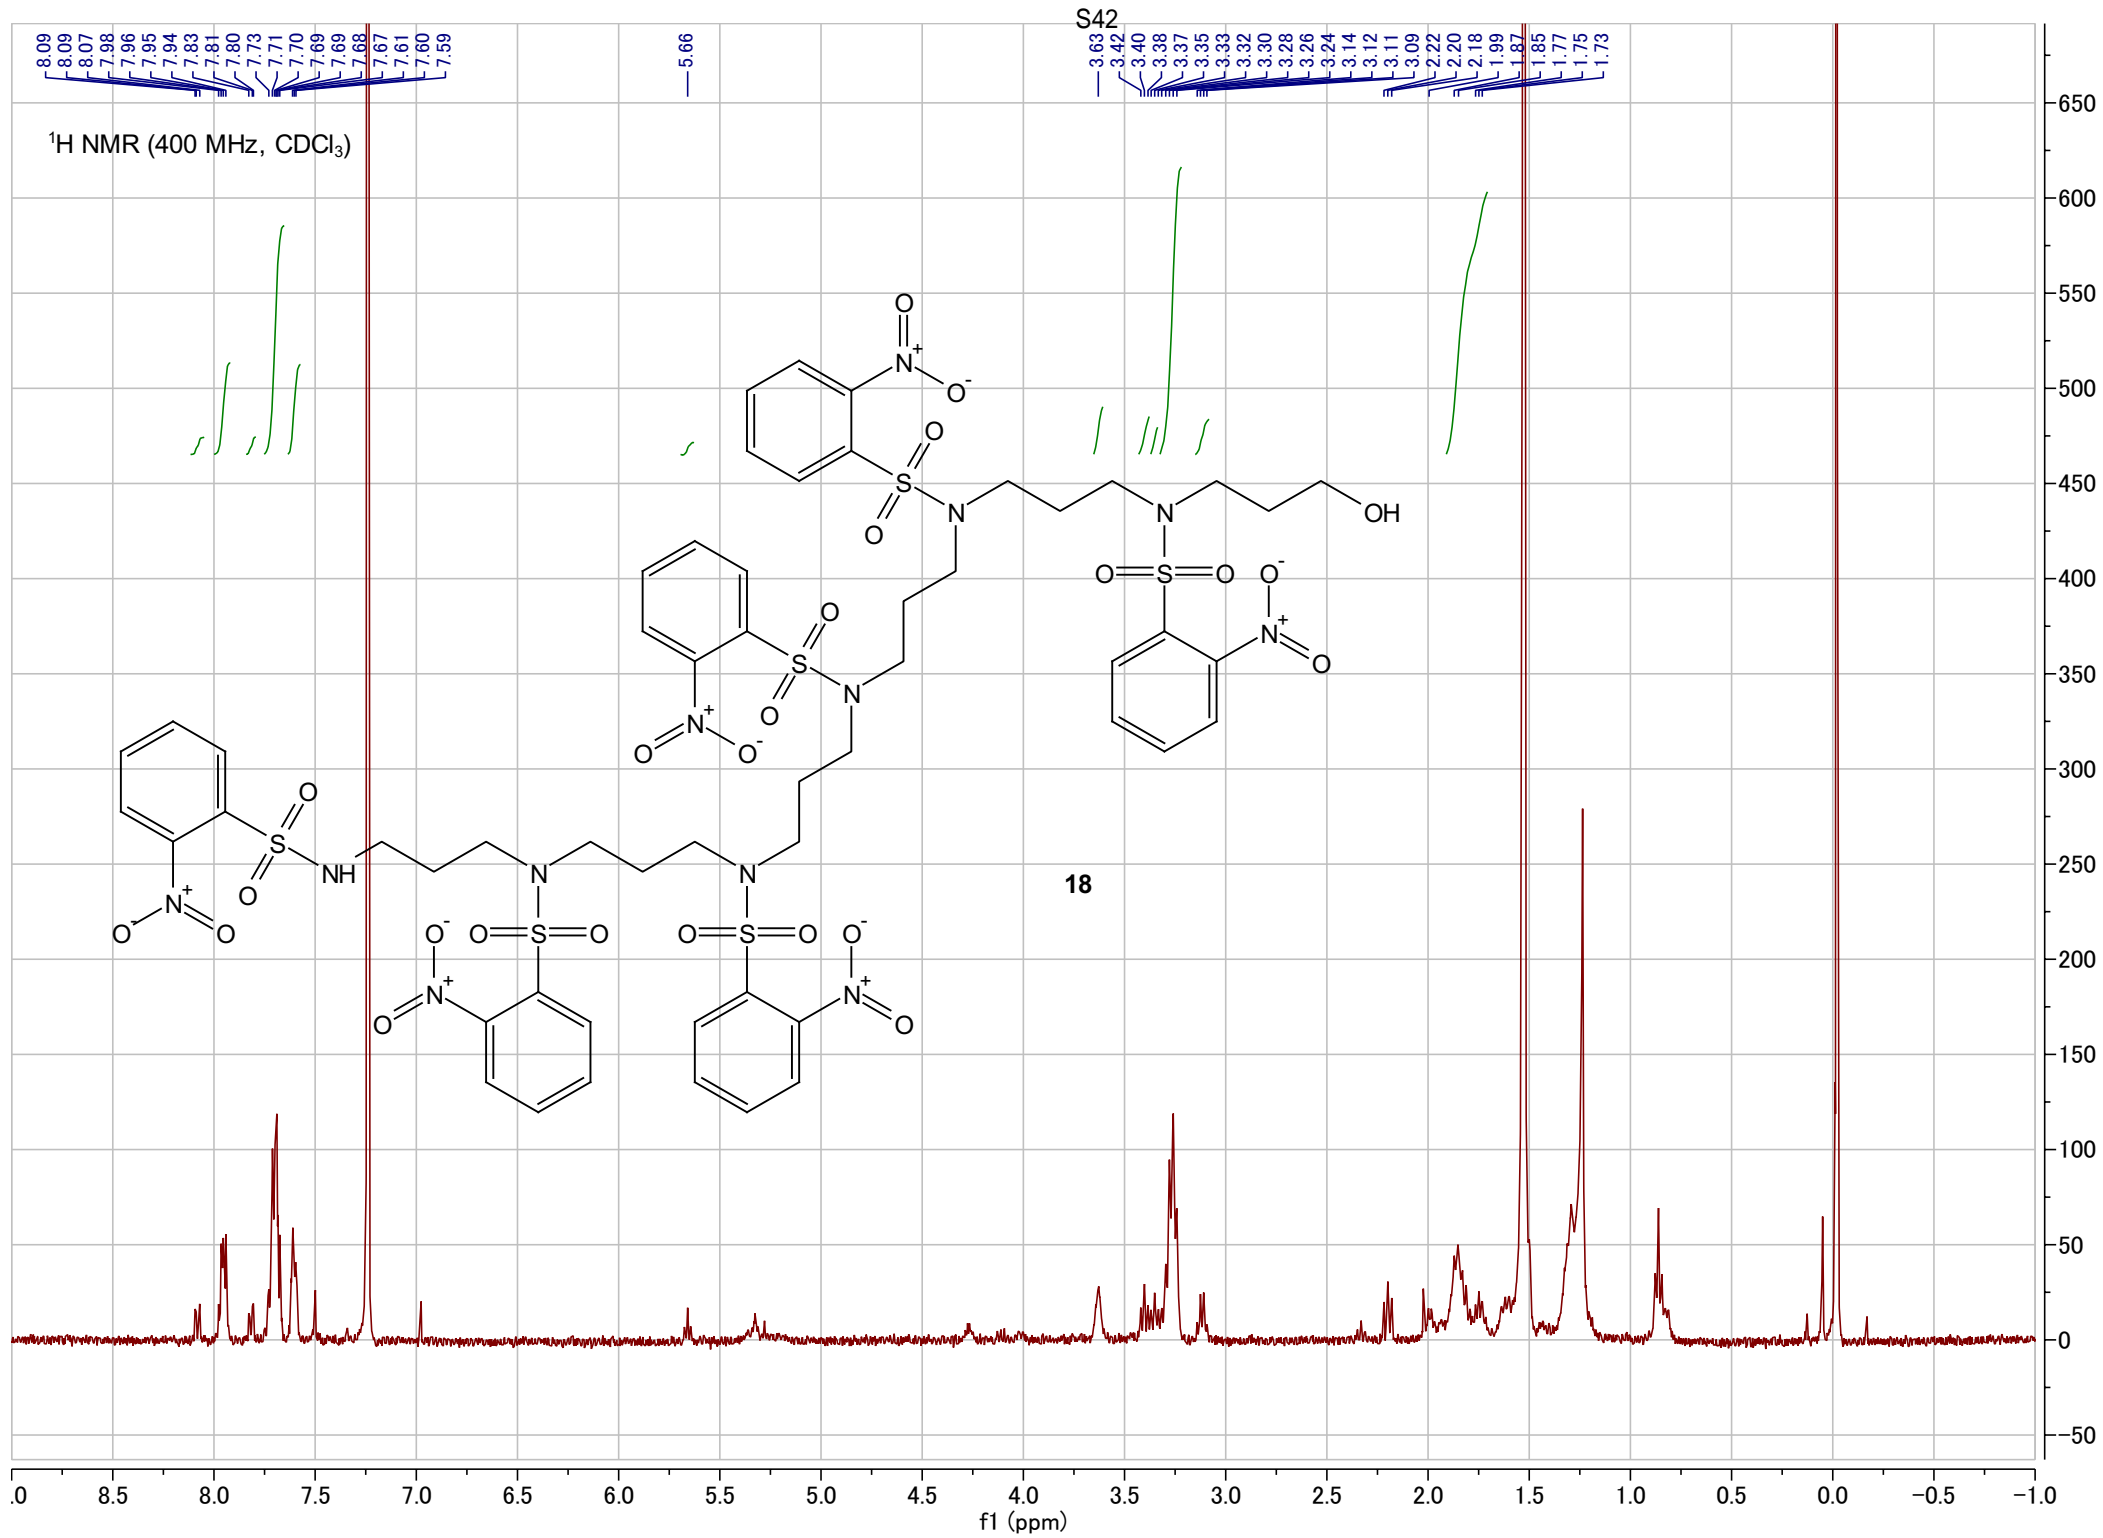

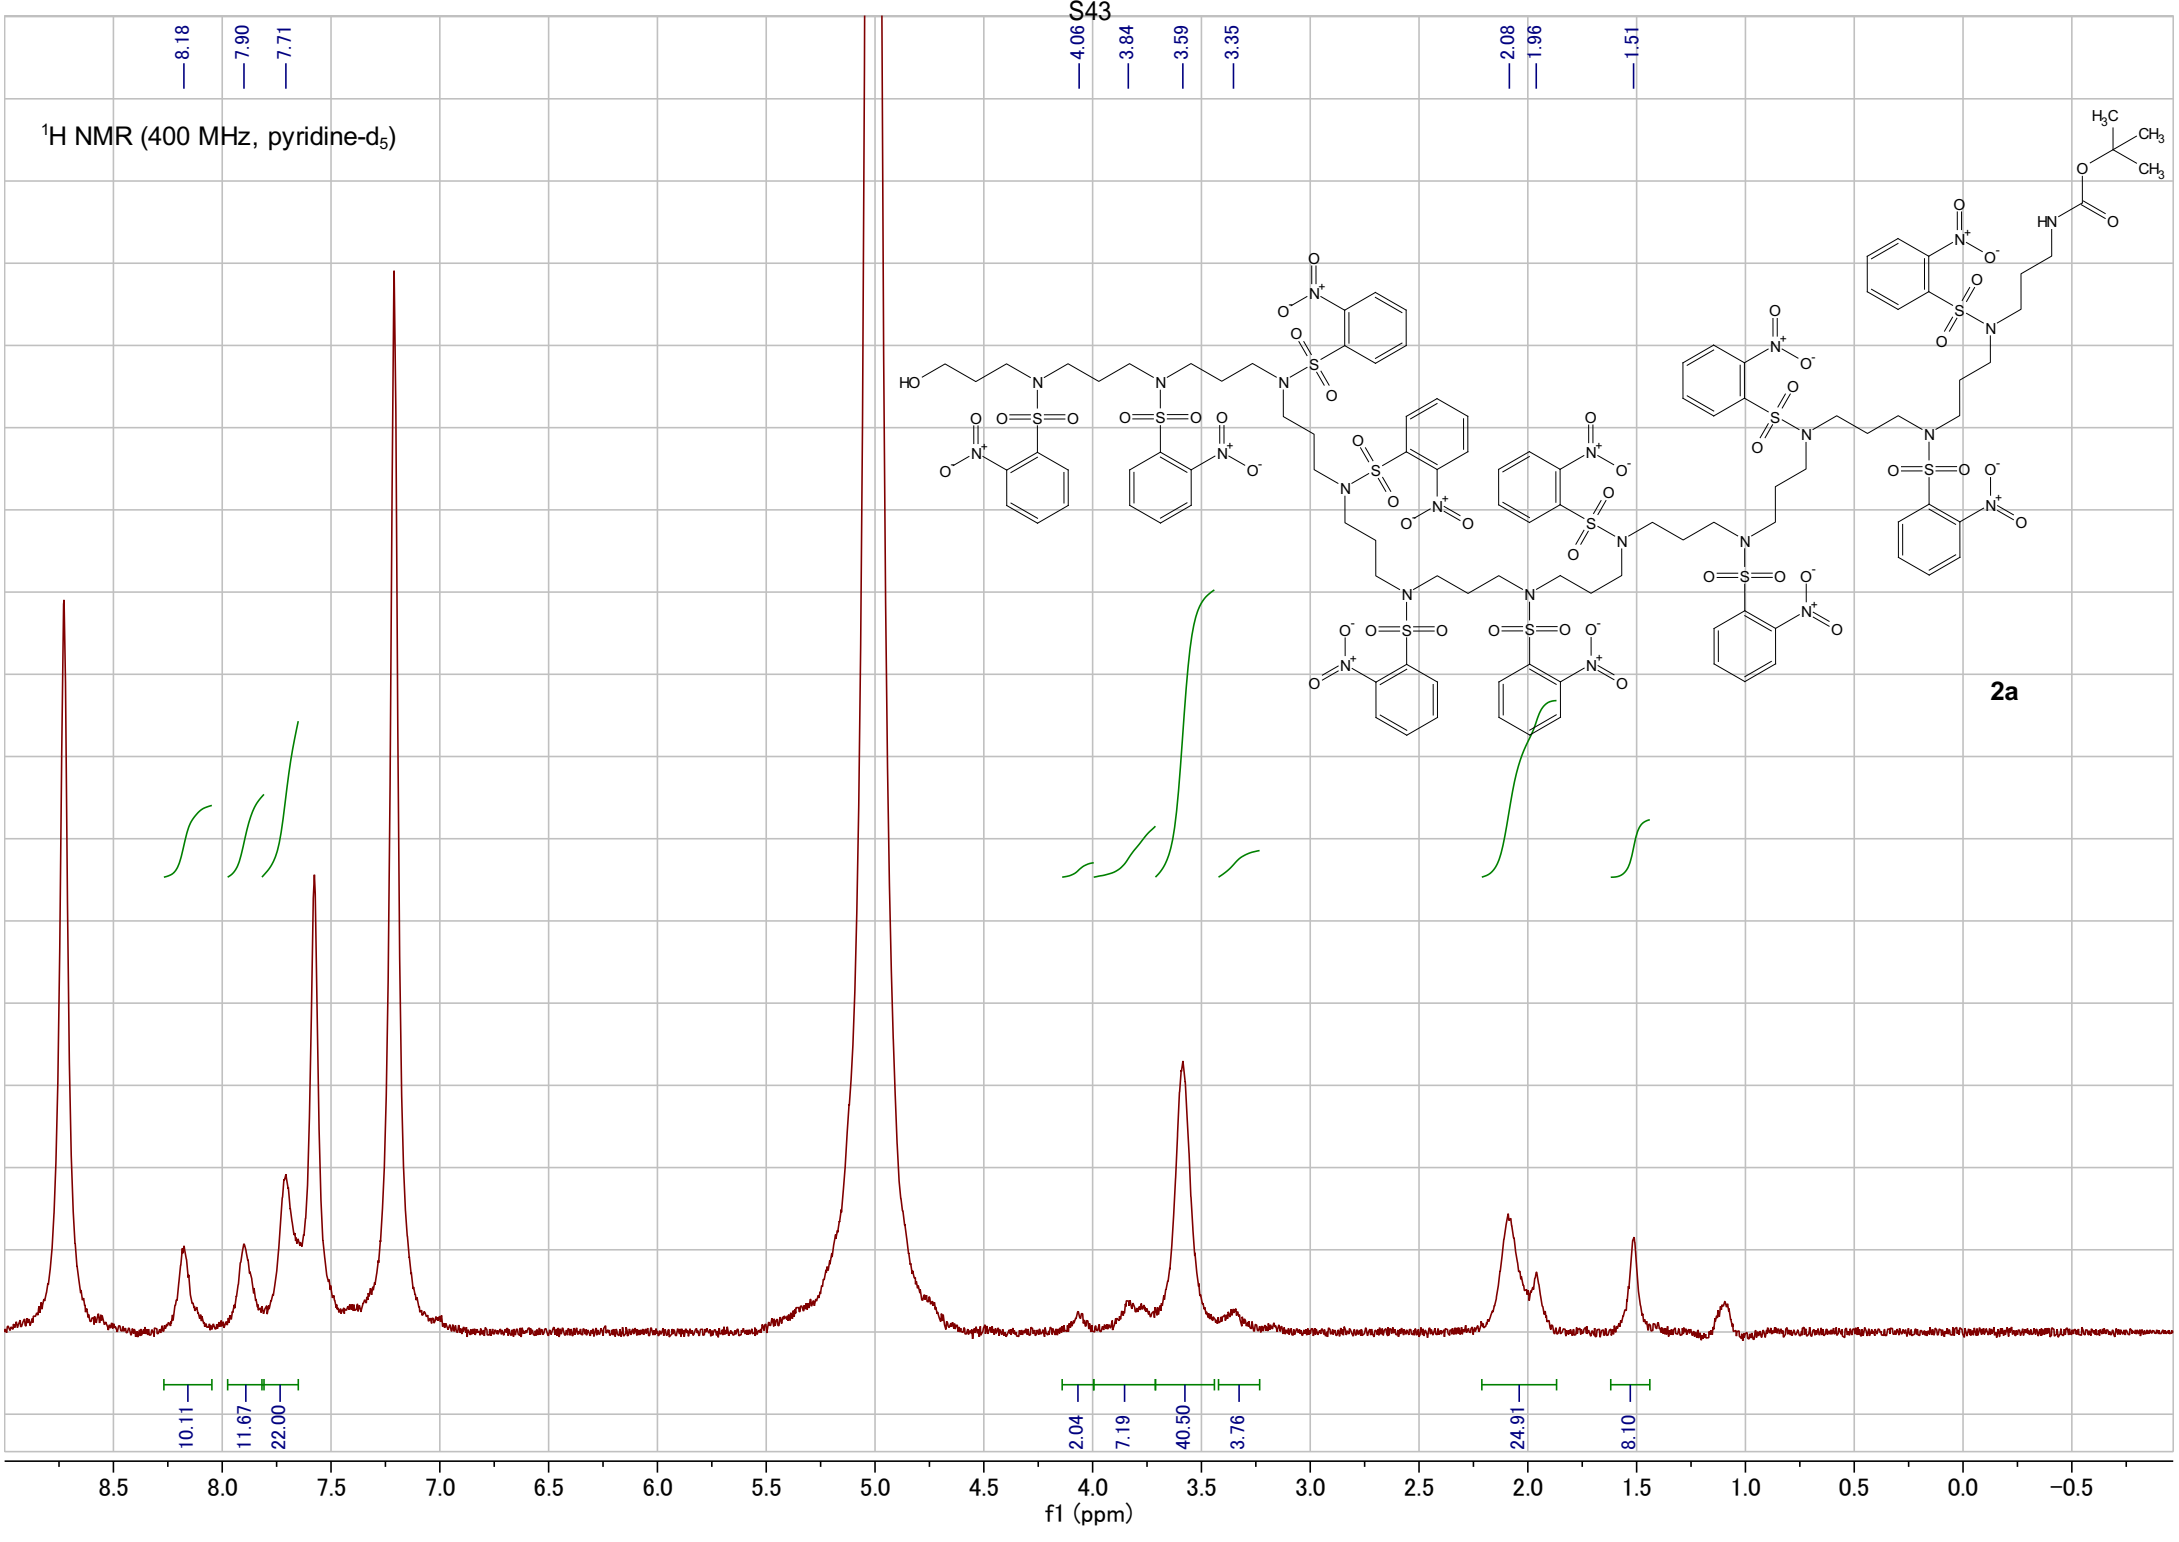

S44

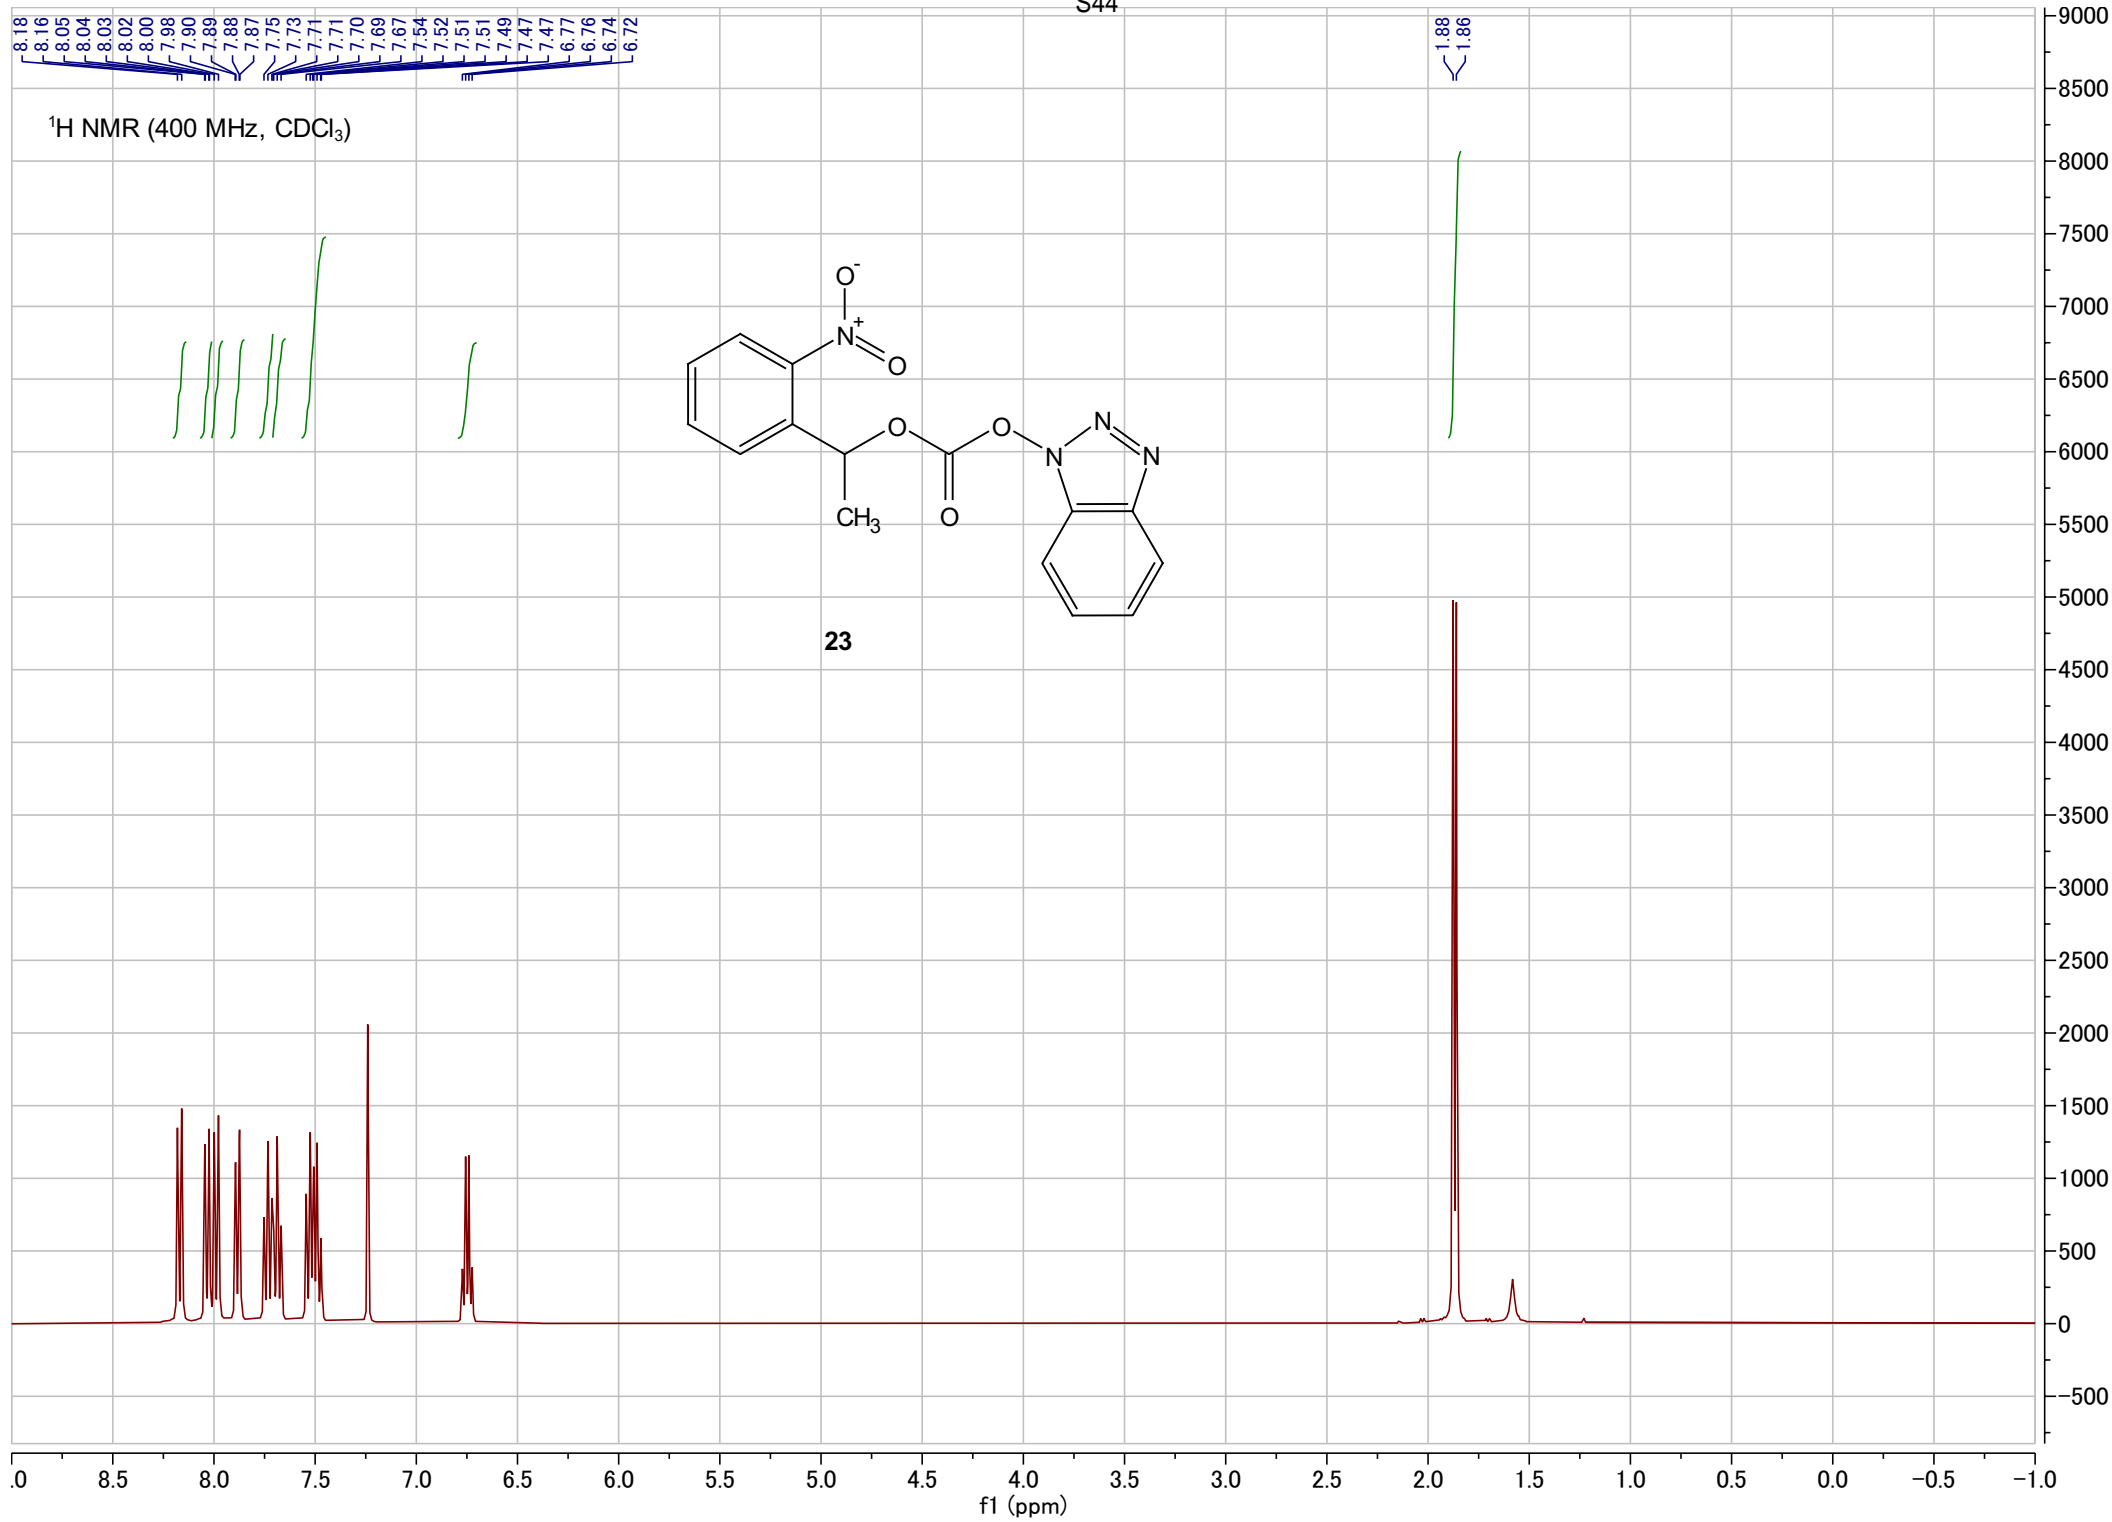

MM-II-117-powder.11.fid  
13C MM-II-117-powder

S45

<sup>13</sup>C NMR (100 MHz, CDCl<sub>3</sub>)

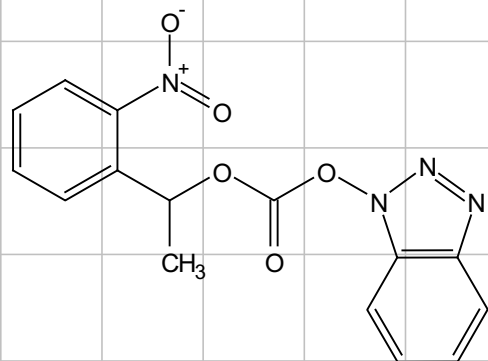

23

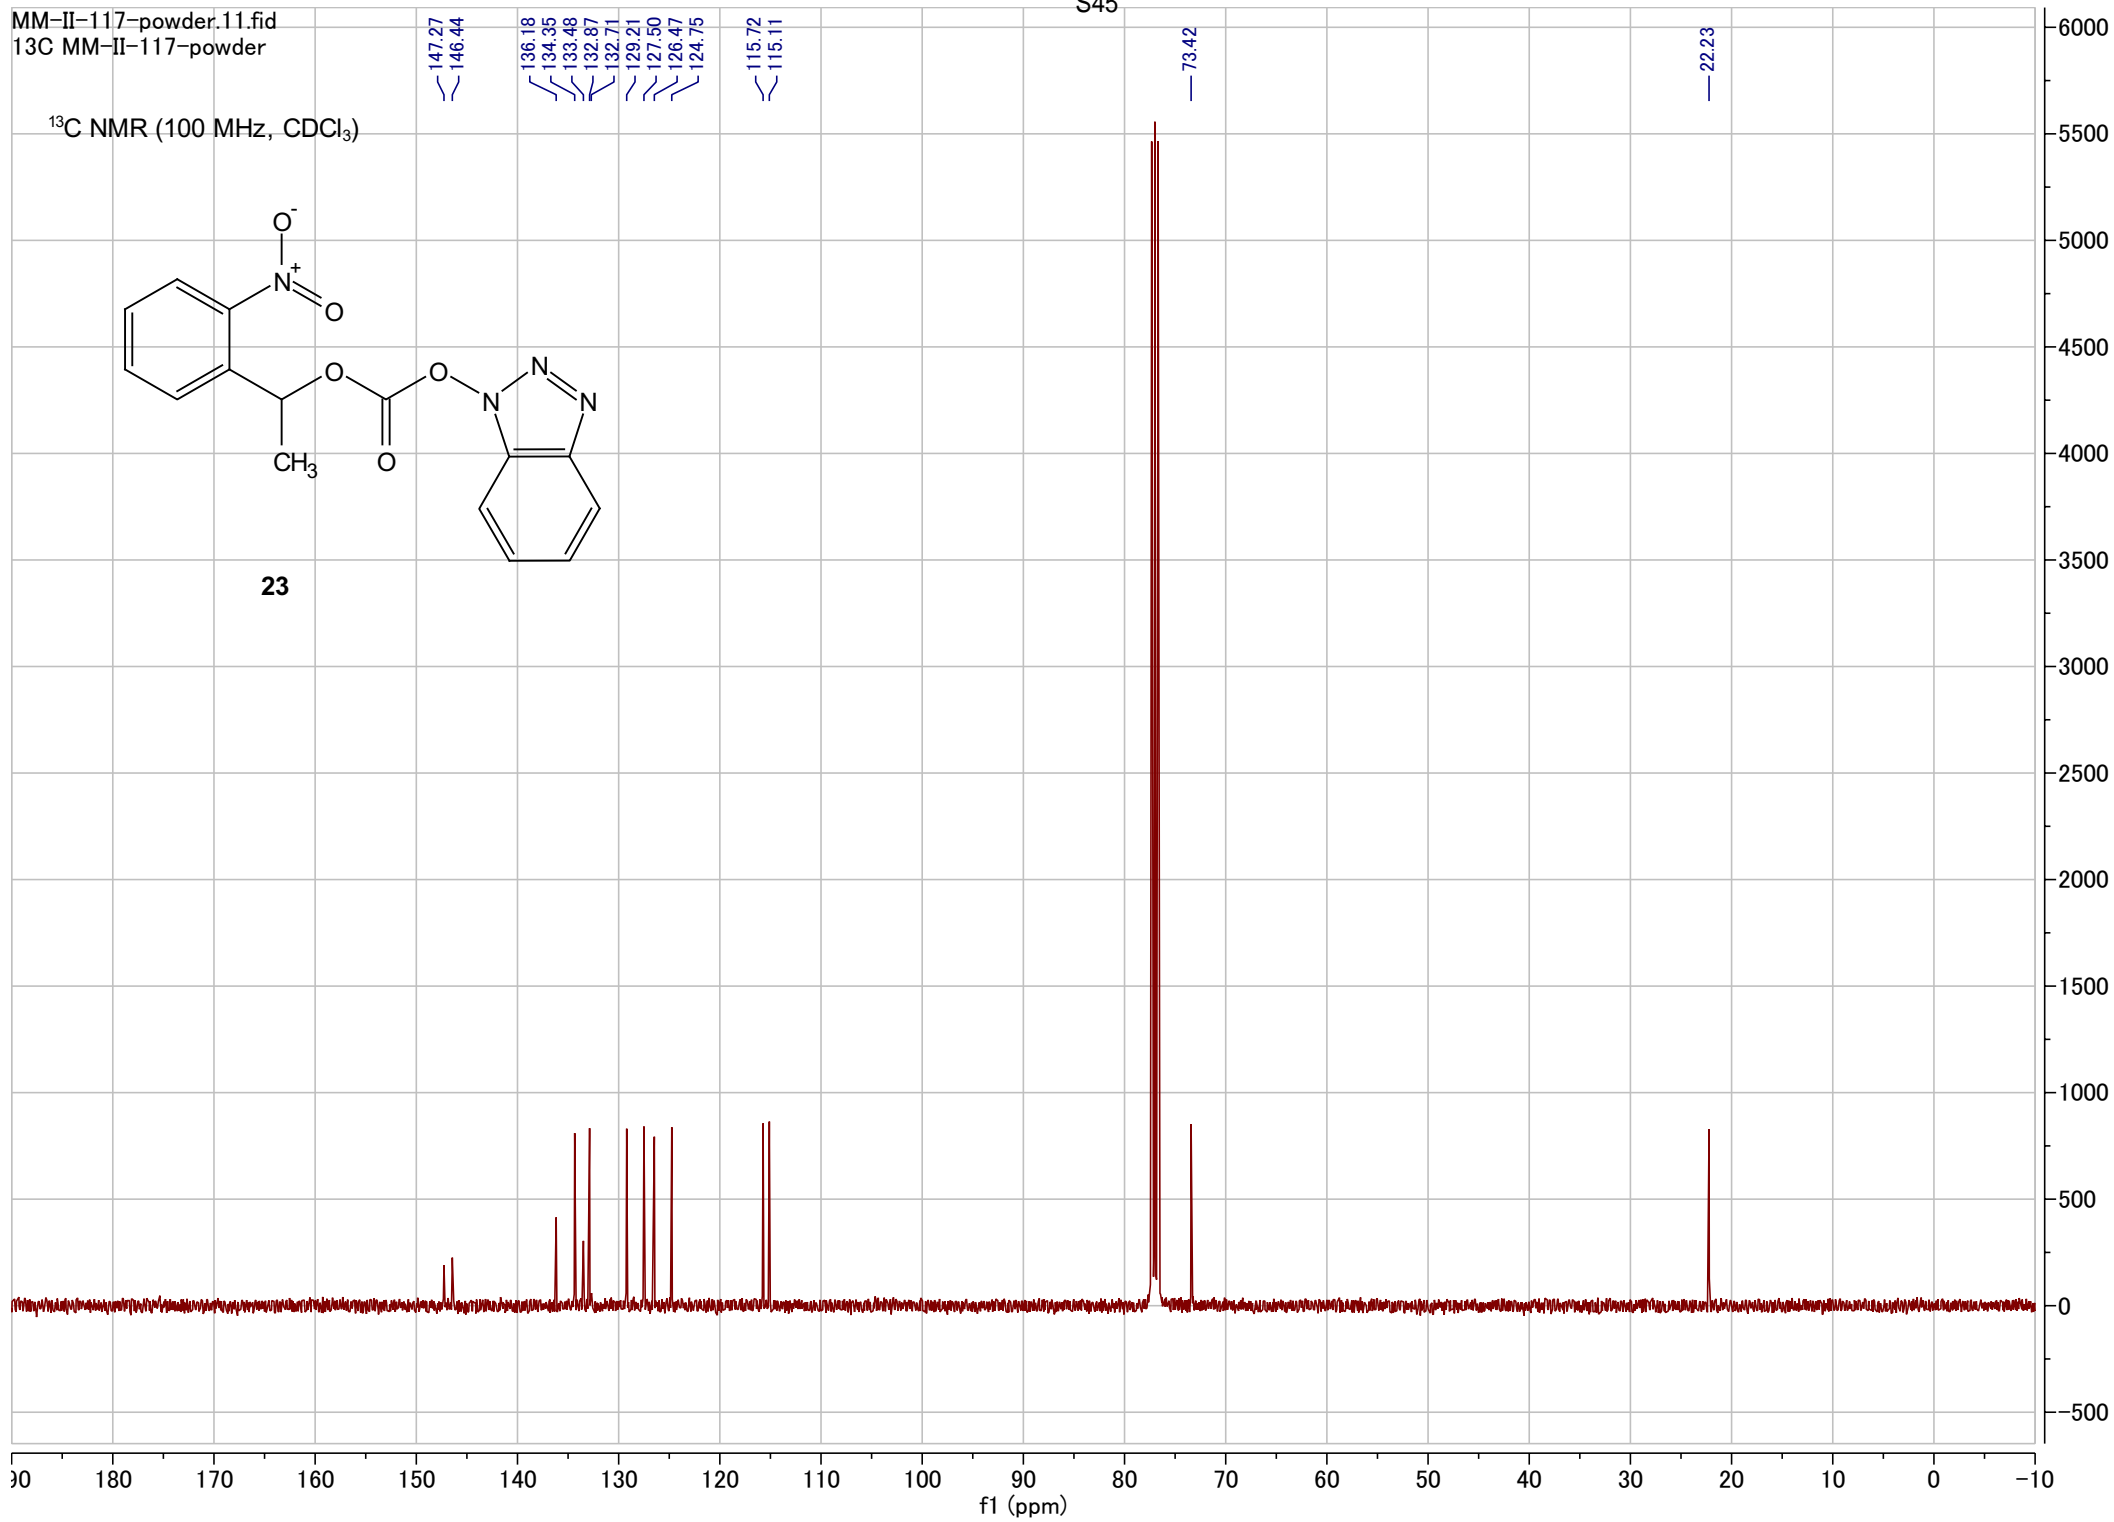

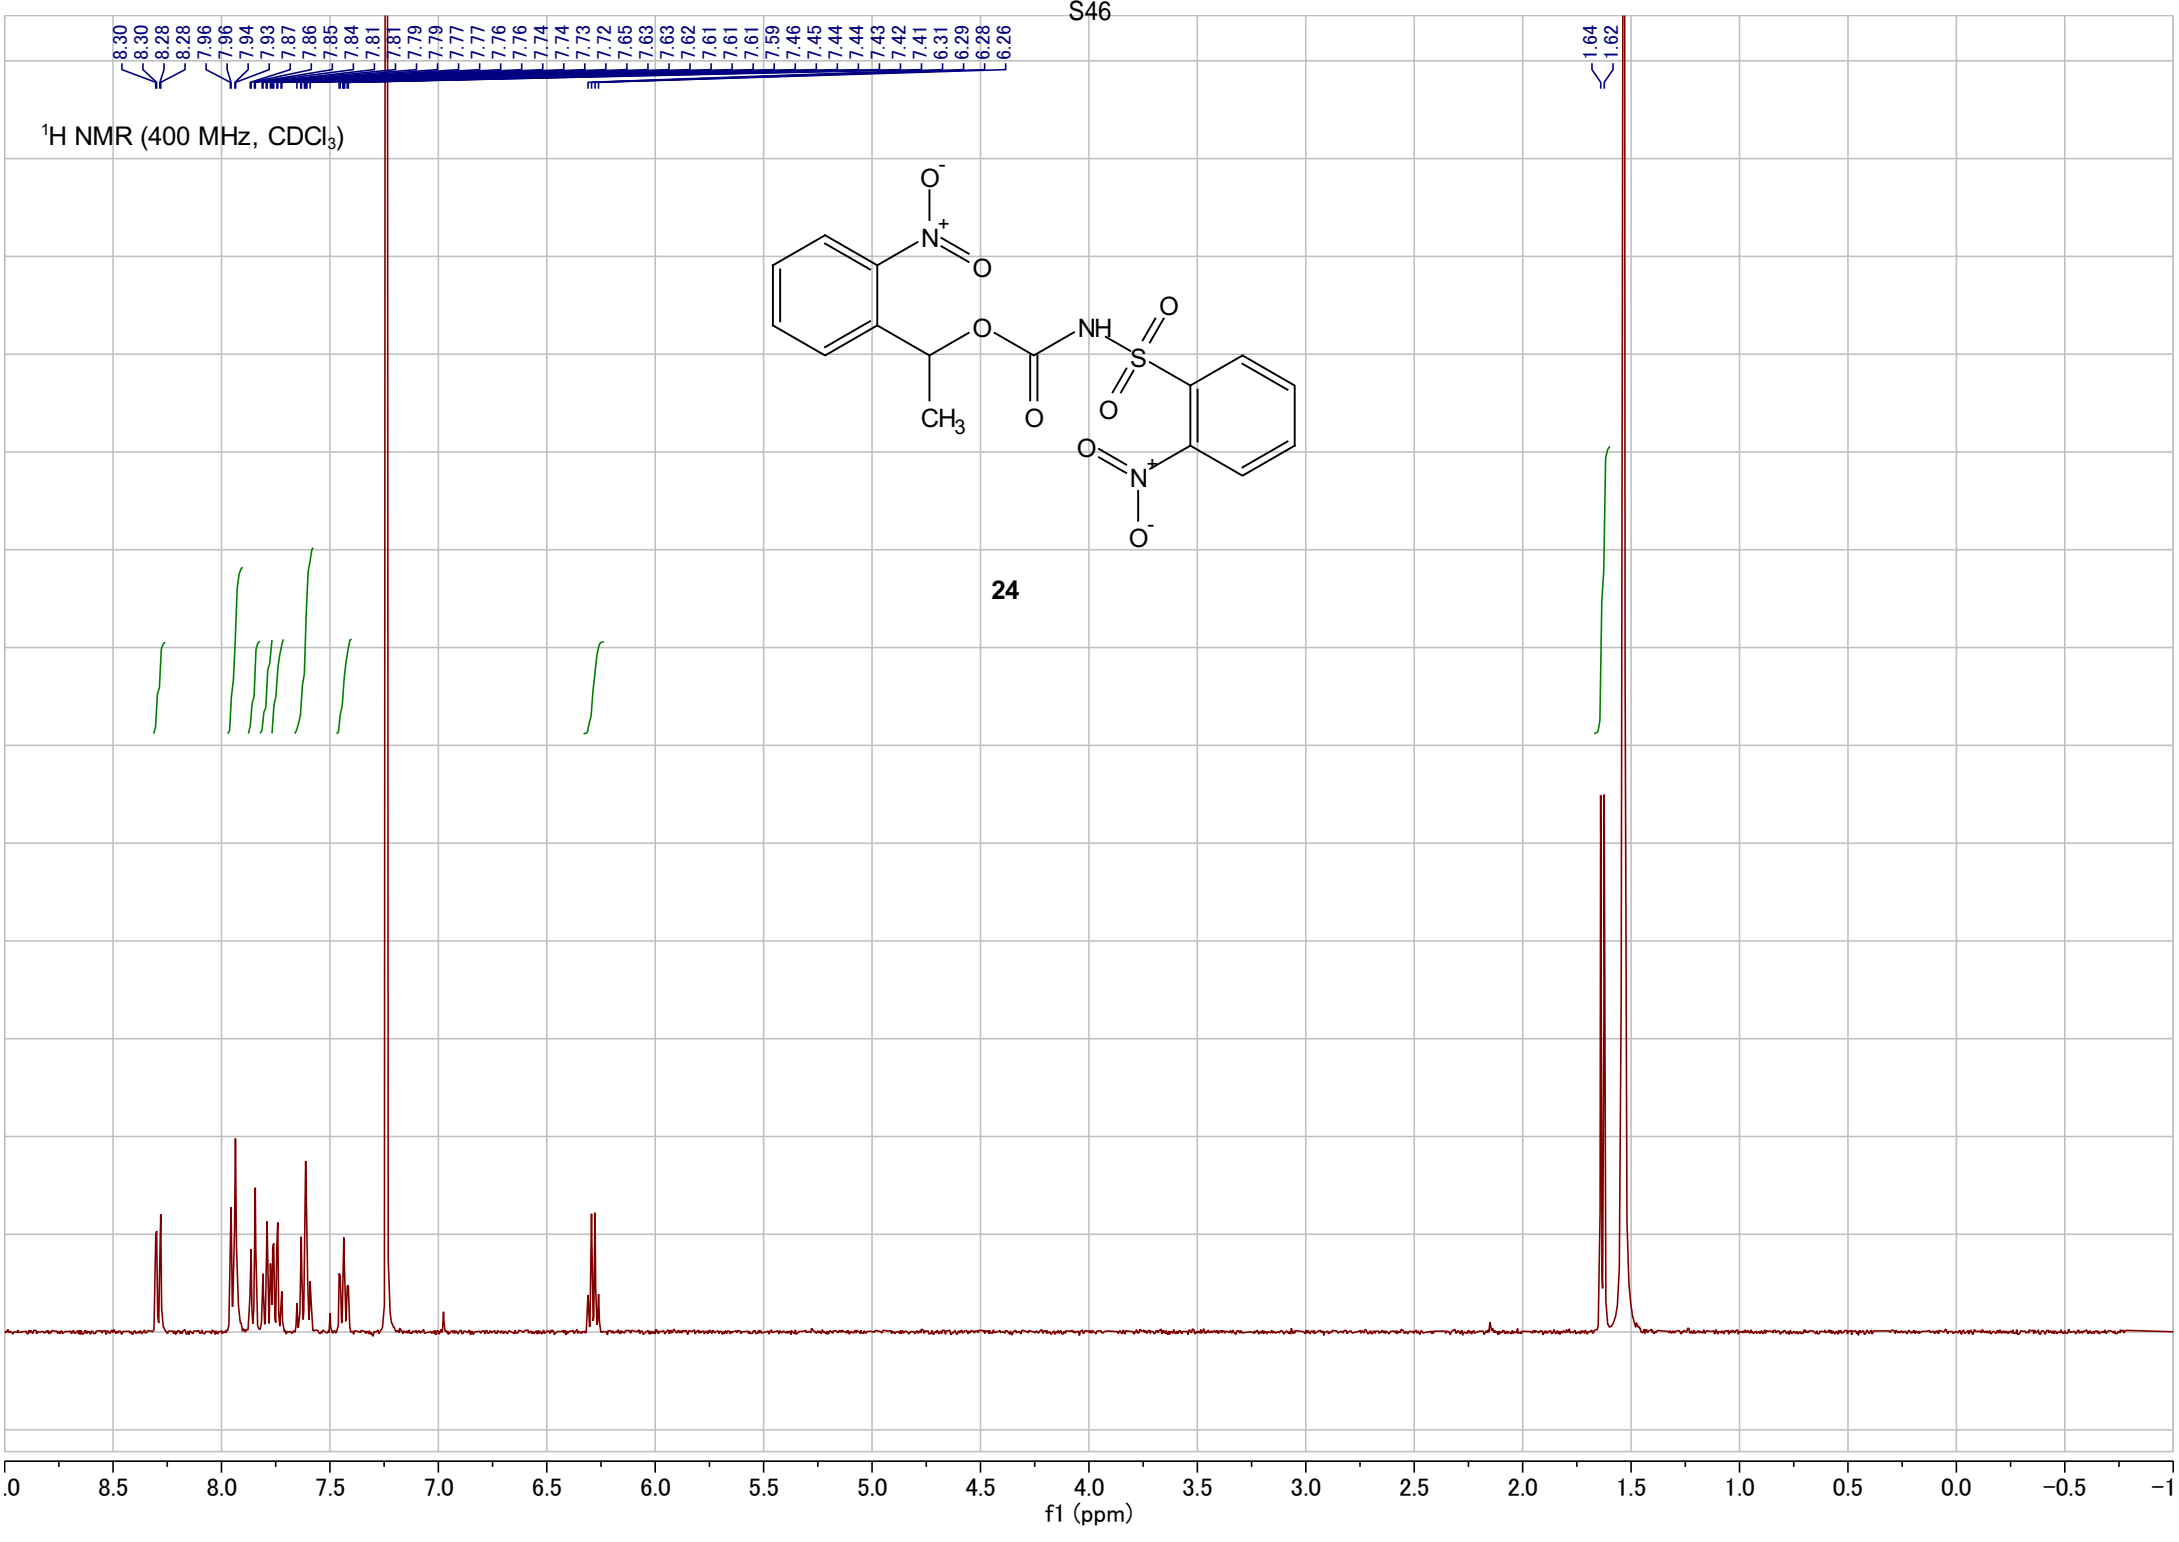

S46

<sup>1</sup>H NMR (400 MHz, CDCl<sub>3</sub>)

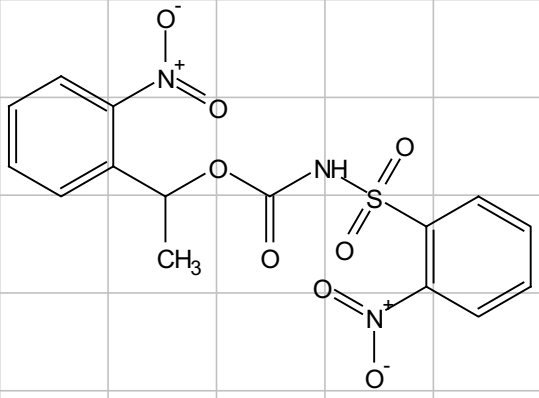

24

8.30  
8.30  
8.28  
8.28  
7.96  
7.94  
7.93  
7.87  
7.86  
7.85  
7.84  
7.81  
7.81  
7.79  
7.79  
7.77  
7.77  
7.76  
7.76  
7.74  
7.74  
7.73  
7.72  
7.65  
7.63  
7.63  
7.62  
7.61  
7.61  
7.61  
7.59  
7.46  
7.45  
7.44  
7.44  
7.43  
7.42  
7.41  
6.31  
6.28  
6.28  
6.26

1.64  
1.62

f1 (ppm)

S47

$^{13}\text{C}$  NMR (100 MHz,  $\text{CDCl}_3$ )

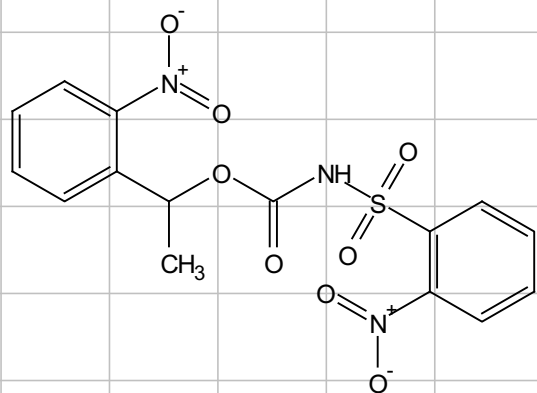

**24**

148.91  
148.08  
147.25  
136.61  
135.08  
134.03  
133.39  
132.68  
131.39  
128.92  
126.94  
125.23  
124.73

71.75

21.95

180 170 160 150 140 130 120 110 100 90 80 70 60 50 40 30 20 10 0 -1  
f1 (ppm)

<sup>1</sup>H NMR (400 MHz, CDCl<sub>3</sub>)

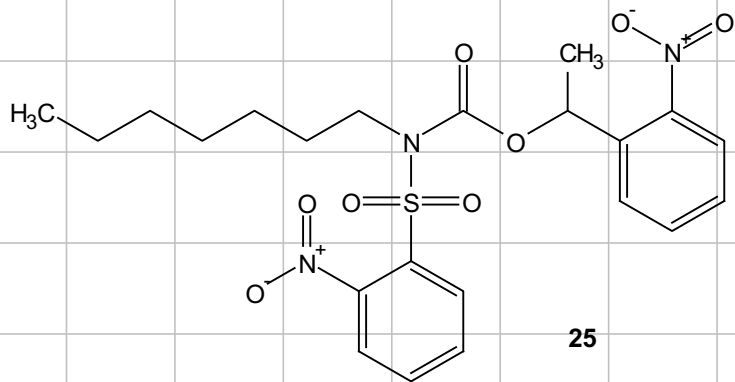

S48

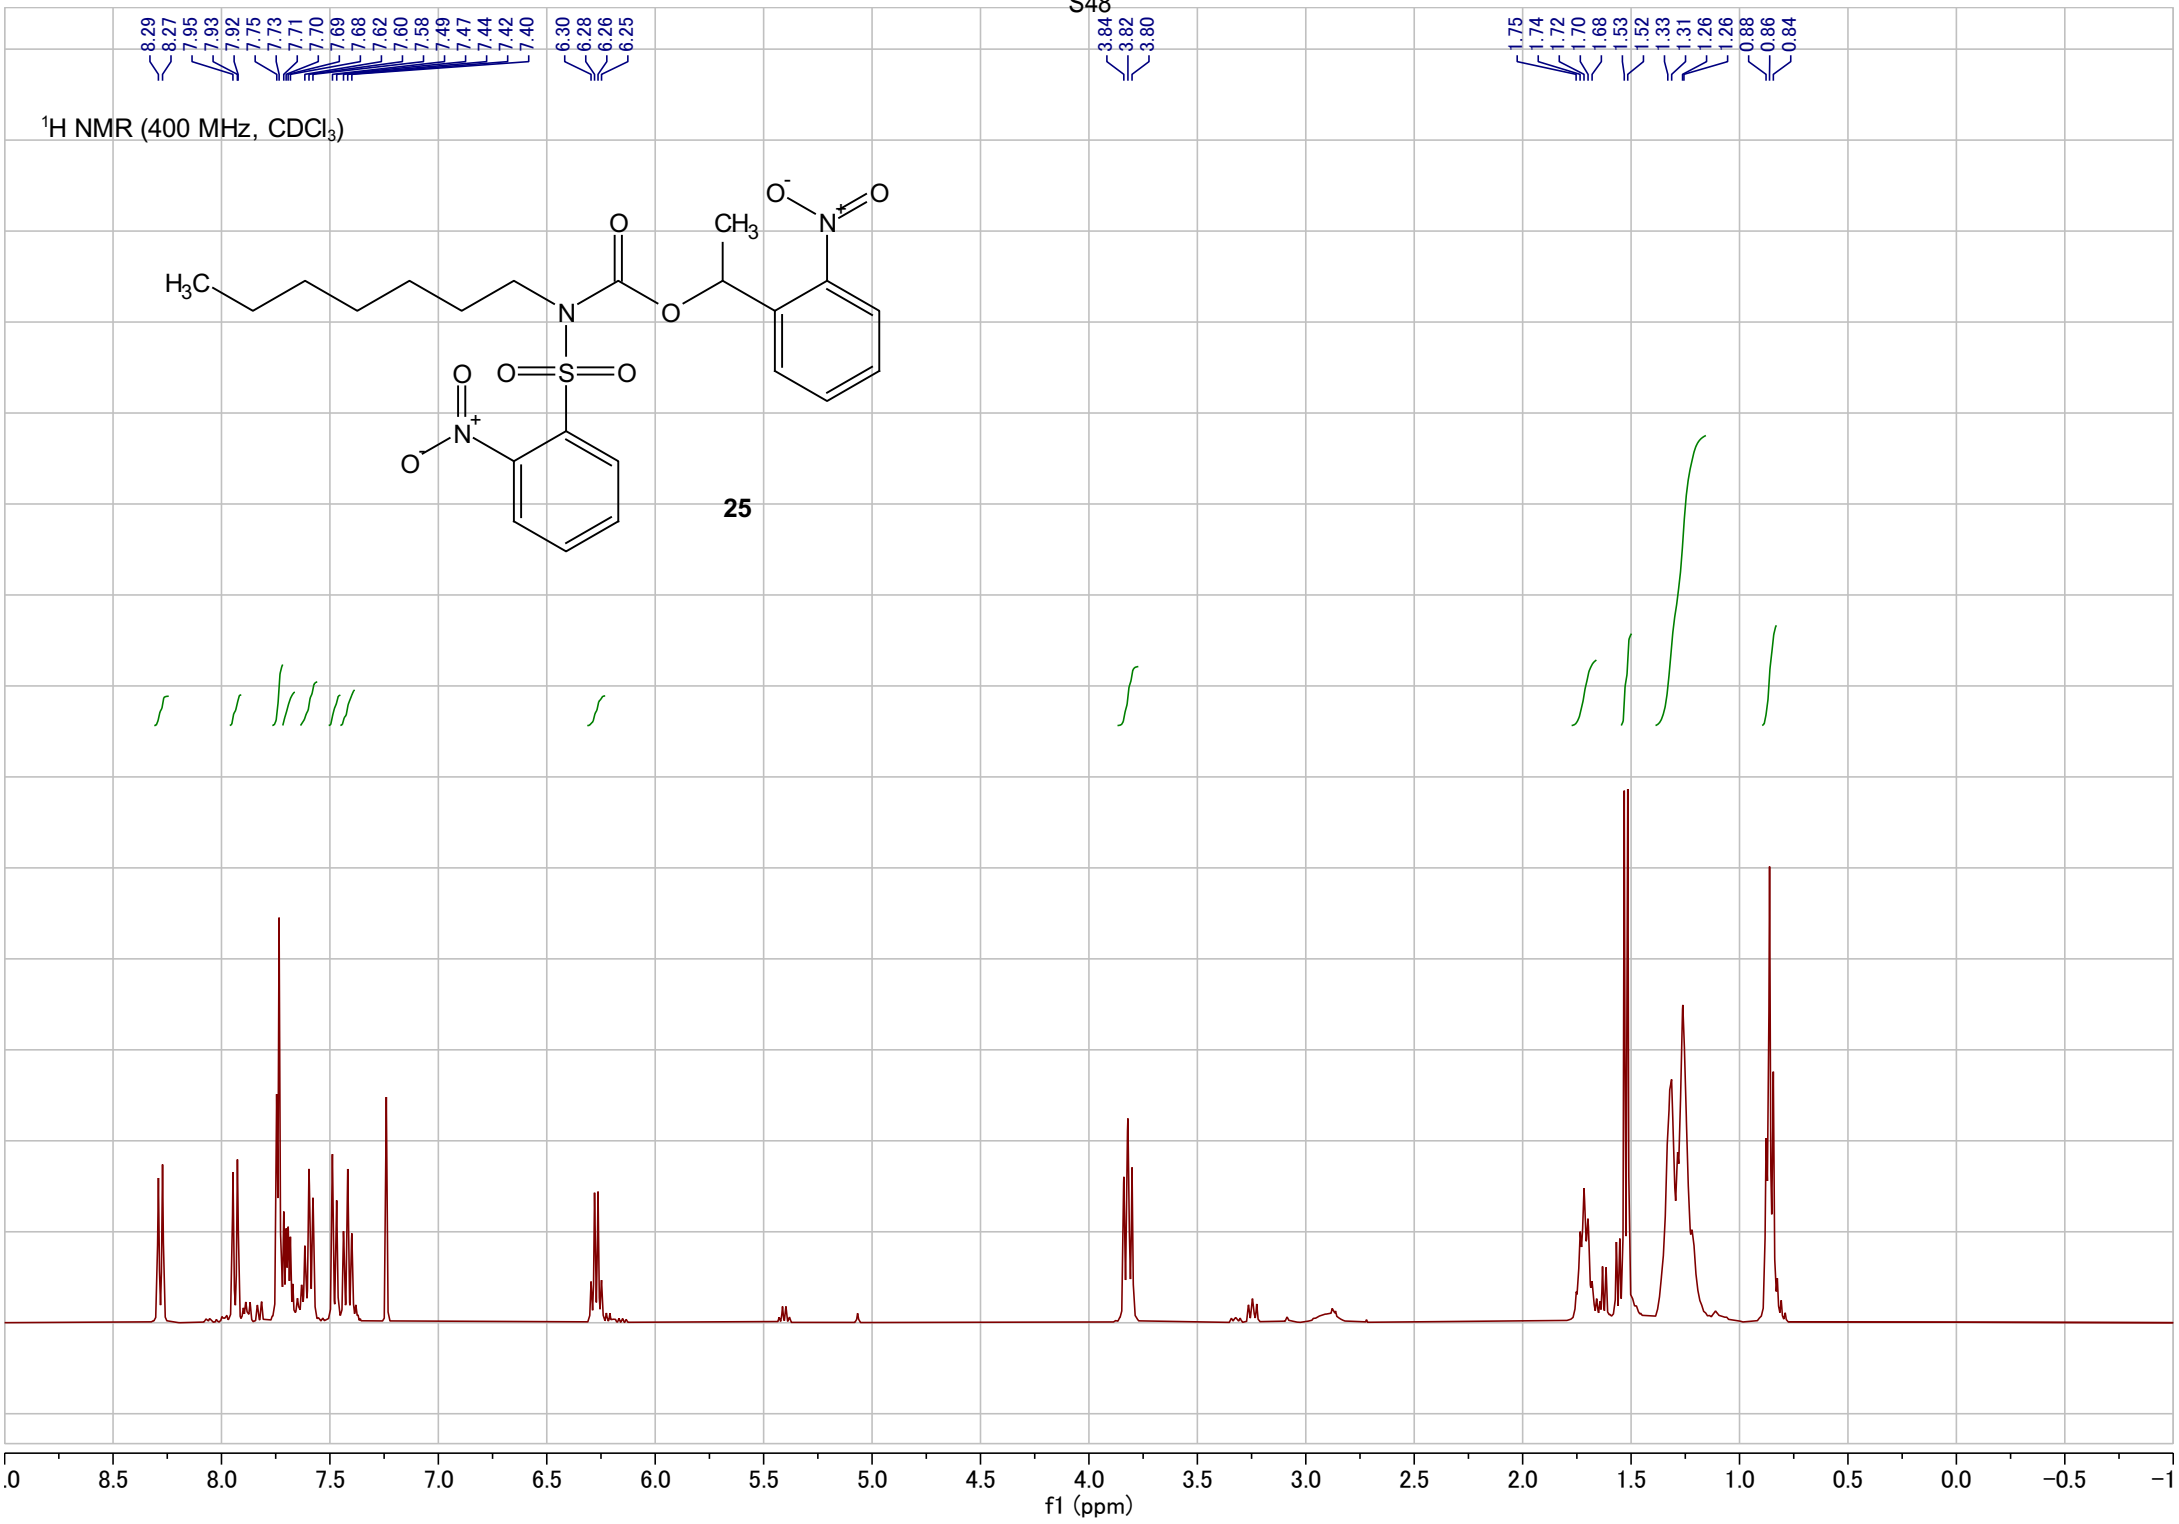



S49

$^{13}\text{C}$  NMR (100 MHz,  $\text{CDCl}_3$ )

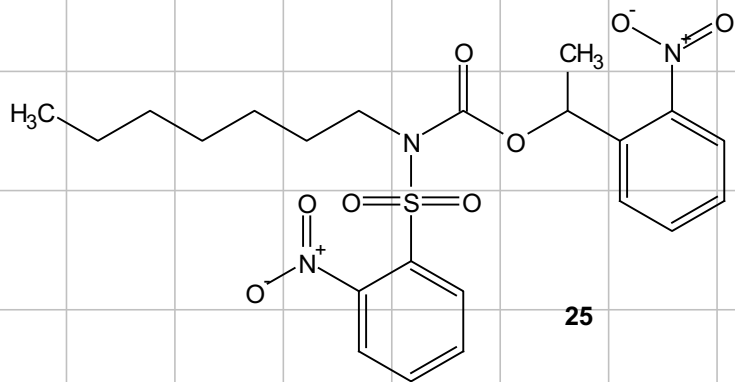

150.73  
147.80  
147.24  
136.90  
134.46  
133.92  
133.64  
133.06  
131.74  
128.75  
126.78  
124.71  
124.46

31.66  
30.19  
28.80  
26.51  
22.52  
21.81

14.03

72.07

48.47

90 180 170 160 150 140 130 120 110 100 90 80 70 60 50 40 30 20 10 0 -1  
f1 (ppm)



<sup>13</sup>C NMR (100 MHz, CDCl<sub>3</sub>)

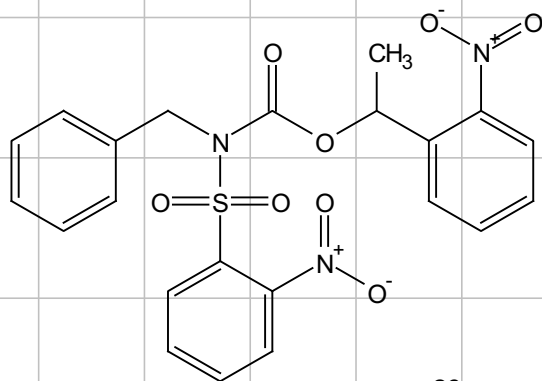

26

150.78  
147.91  
147.05  
137.02  
136.86  
134.70  
134.41  
133.95  
132.47  
131.98  
128.76  
128.58  
127.76  
127.52  
126.79  
124.60  
124.58

S51

72.08

51.36

21.83

190 180 170 160 150 140 130 120 110 100 90 80 70 60 50 40 30 20 10 0 -1  
f1 (ppm)

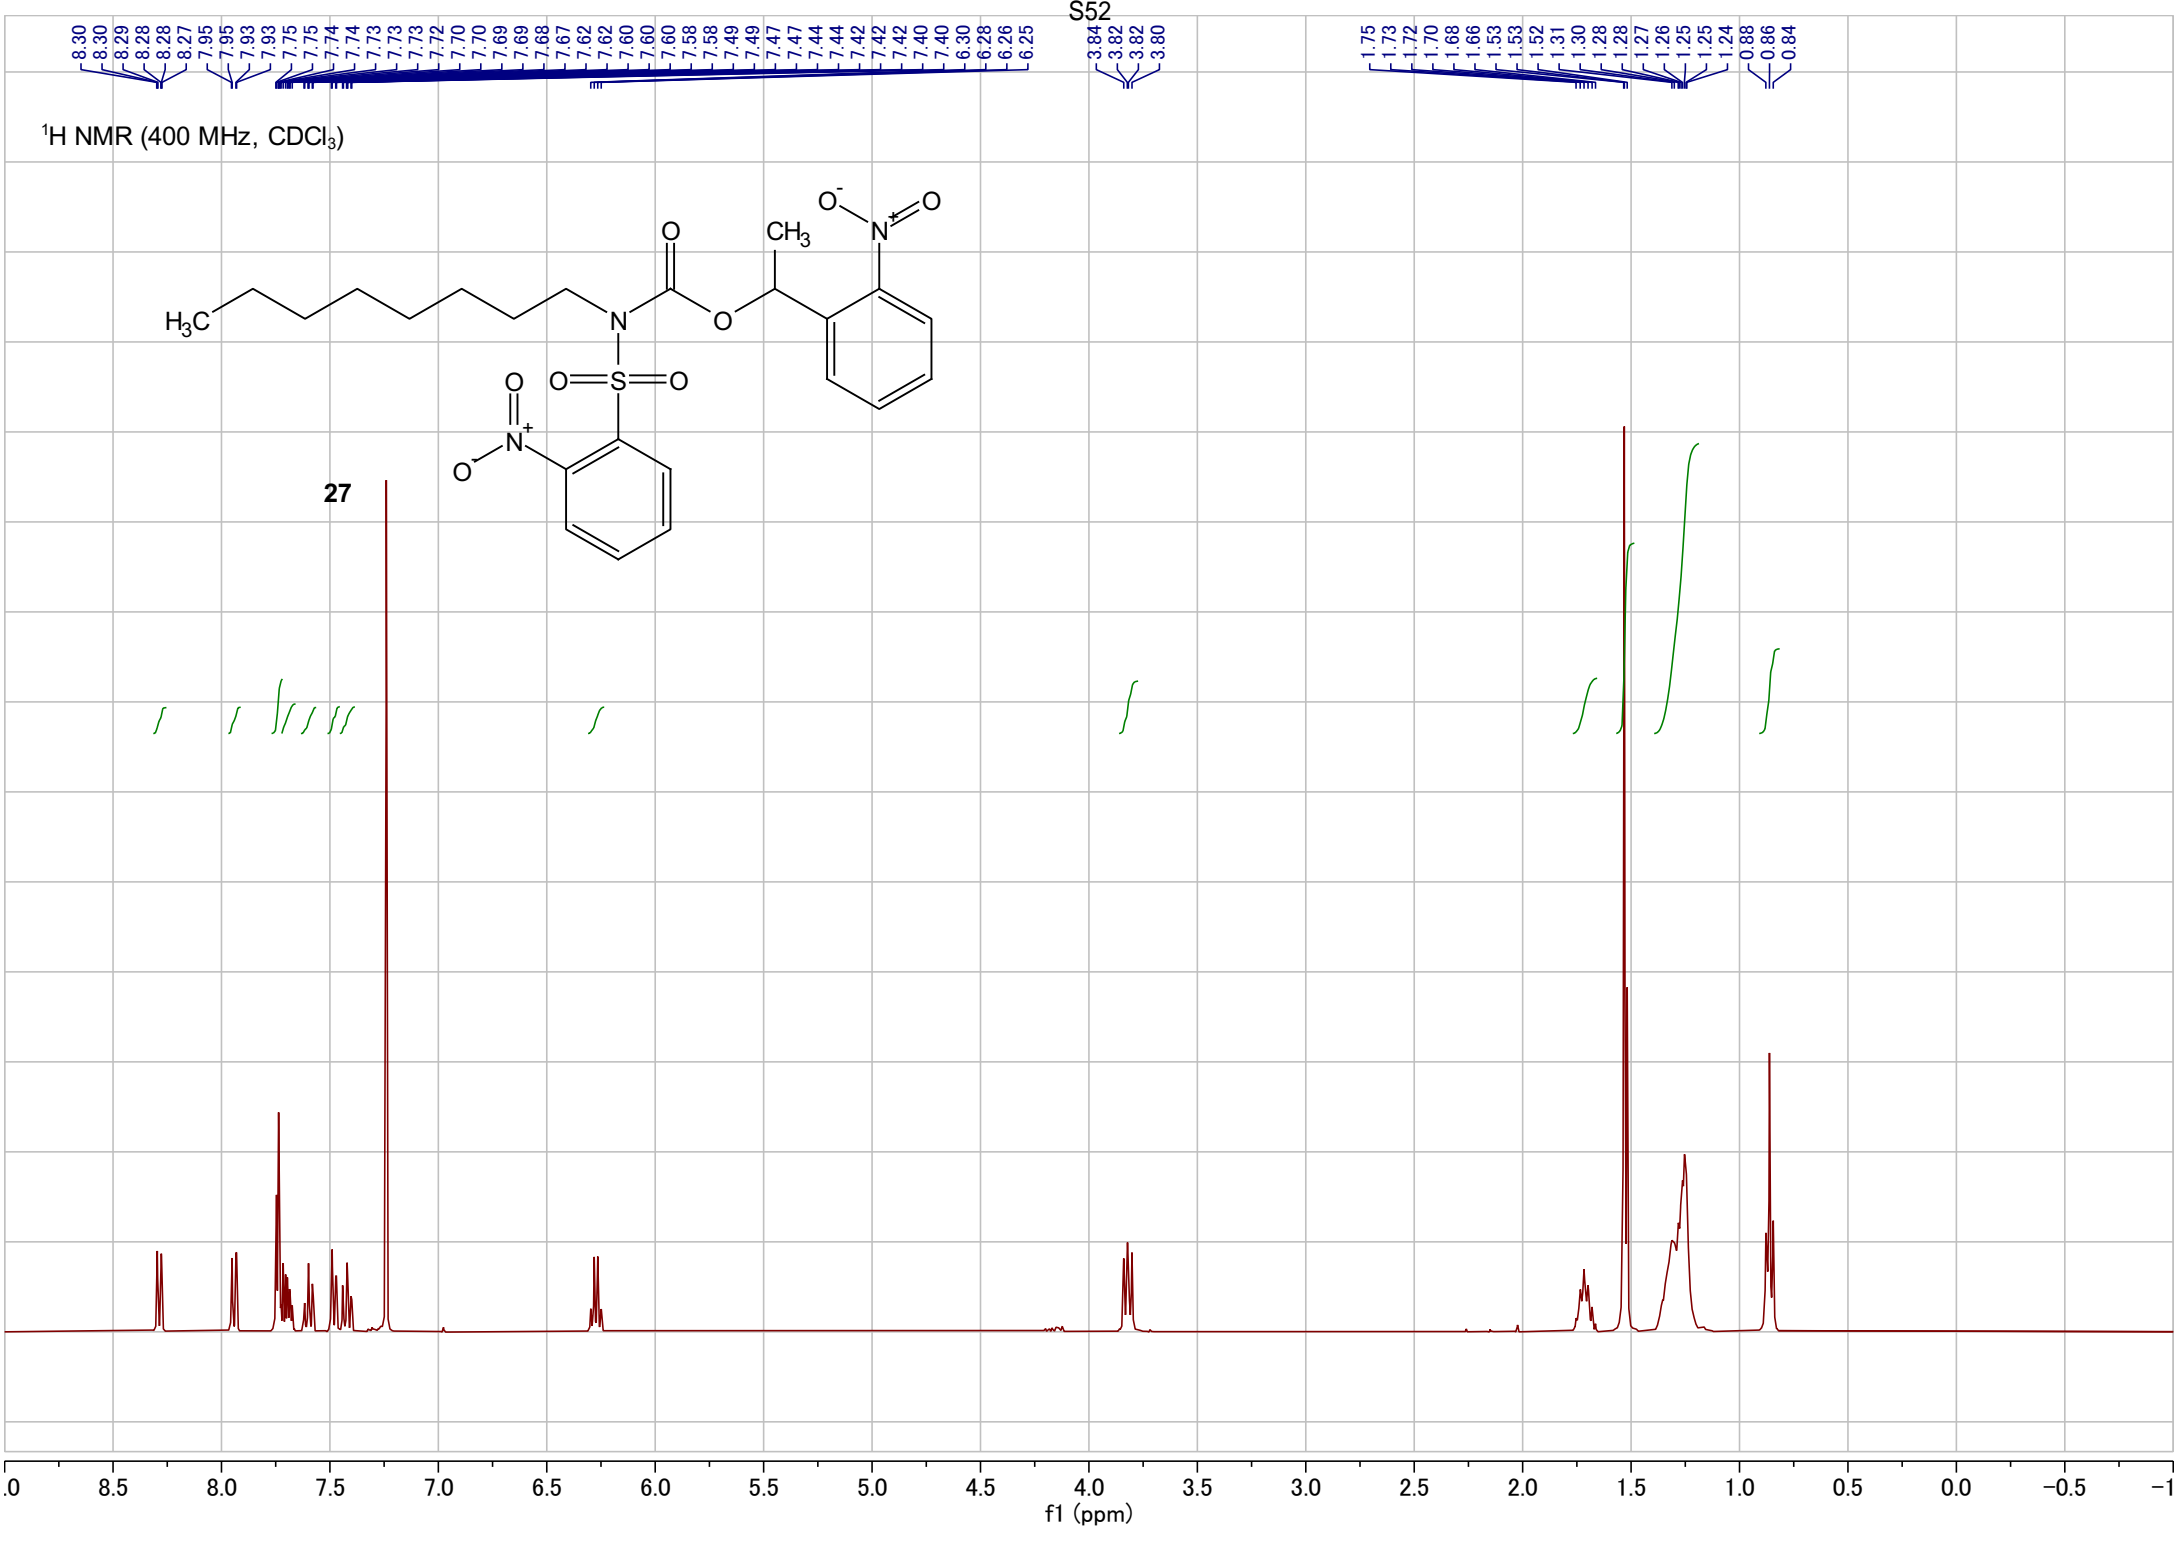

<sup>1</sup>H NMR (400 MHz, CDCl<sub>3</sub>)

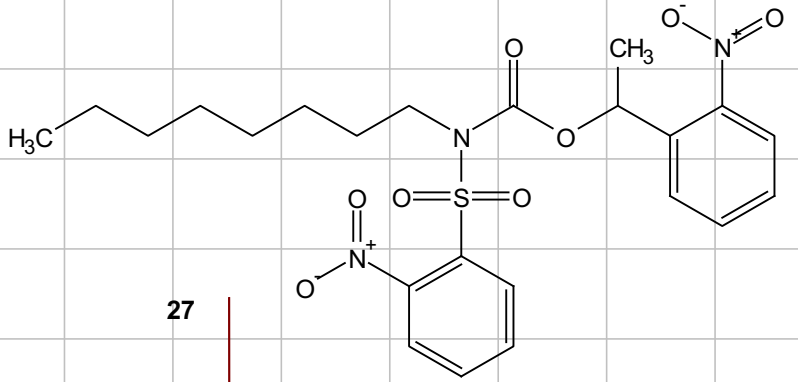

27

552

f1 (ppm)

8.30  
8.29  
8.28  
8.27  
7.95  
7.93  
7.93  
7.75  
7.75  
7.74  
7.74  
7.73  
7.73  
7.72  
7.70  
7.69  
7.69  
7.68  
7.67  
7.62  
7.62  
7.60  
7.60  
7.58  
7.58  
7.49  
7.49  
7.47  
7.47  
7.44  
7.44  
7.42  
7.42  
7.42  
7.40  
7.40  
6.30  
6.28  
6.26  
6.25

3.84  
3.82  
3.82  
3.80

1.75  
1.73  
1.72  
1.70  
1.68  
1.66  
1.53  
1.53  
1.52  
1.31  
1.30  
1.28  
1.28  
1.27  
1.26  
1.25  
1.24  
0.88  
0.86  
0.84

0 8.5 8.0 7.5 7.0 6.5 6.0 5.5 5.0 4.5 4.0 3.5 3.0 2.5 2.0 1.5 1.0 0.5 0.0 -0.5 -1

$^{13}\text{C}$  NMR (100 MHz,  $\text{CDCl}_3$ )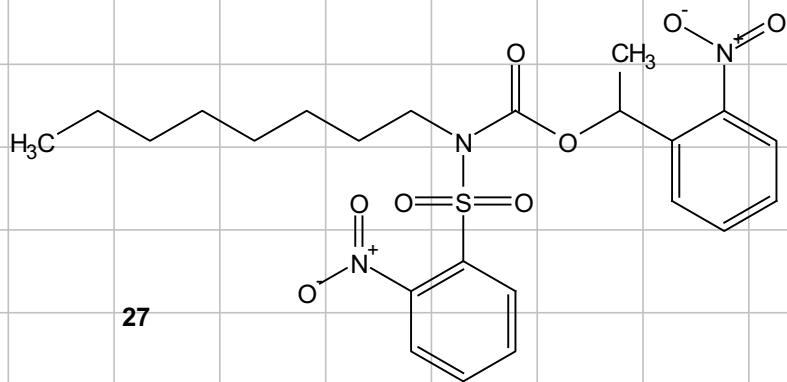

150.72  
147.79  
147.23

136.88  
134.47  
133.92  
133.62  
133.04  
131.74

128.75  
126.78  
124.70  
124.46

72.06

48.46

31.72  
30.18  
29.12  
29.09  
26.55  
22.59  
21.80

14.04

190 180 170 160 150 140 130 120 110 100 90 80 70 60 50 40 30 20 10 0 -1

f1 (ppm)

<sup>1</sup>H NMR (400 MHz, CDCl<sub>3</sub>)

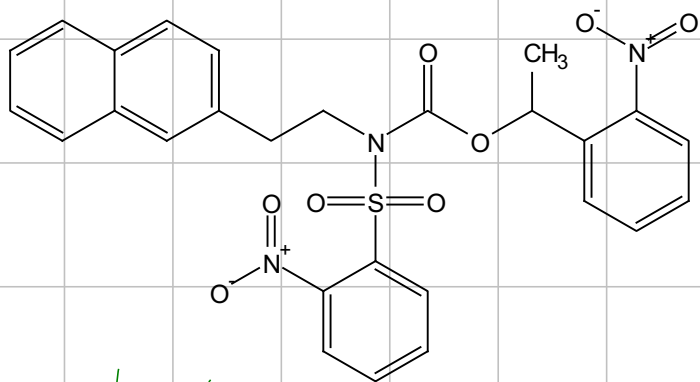

28

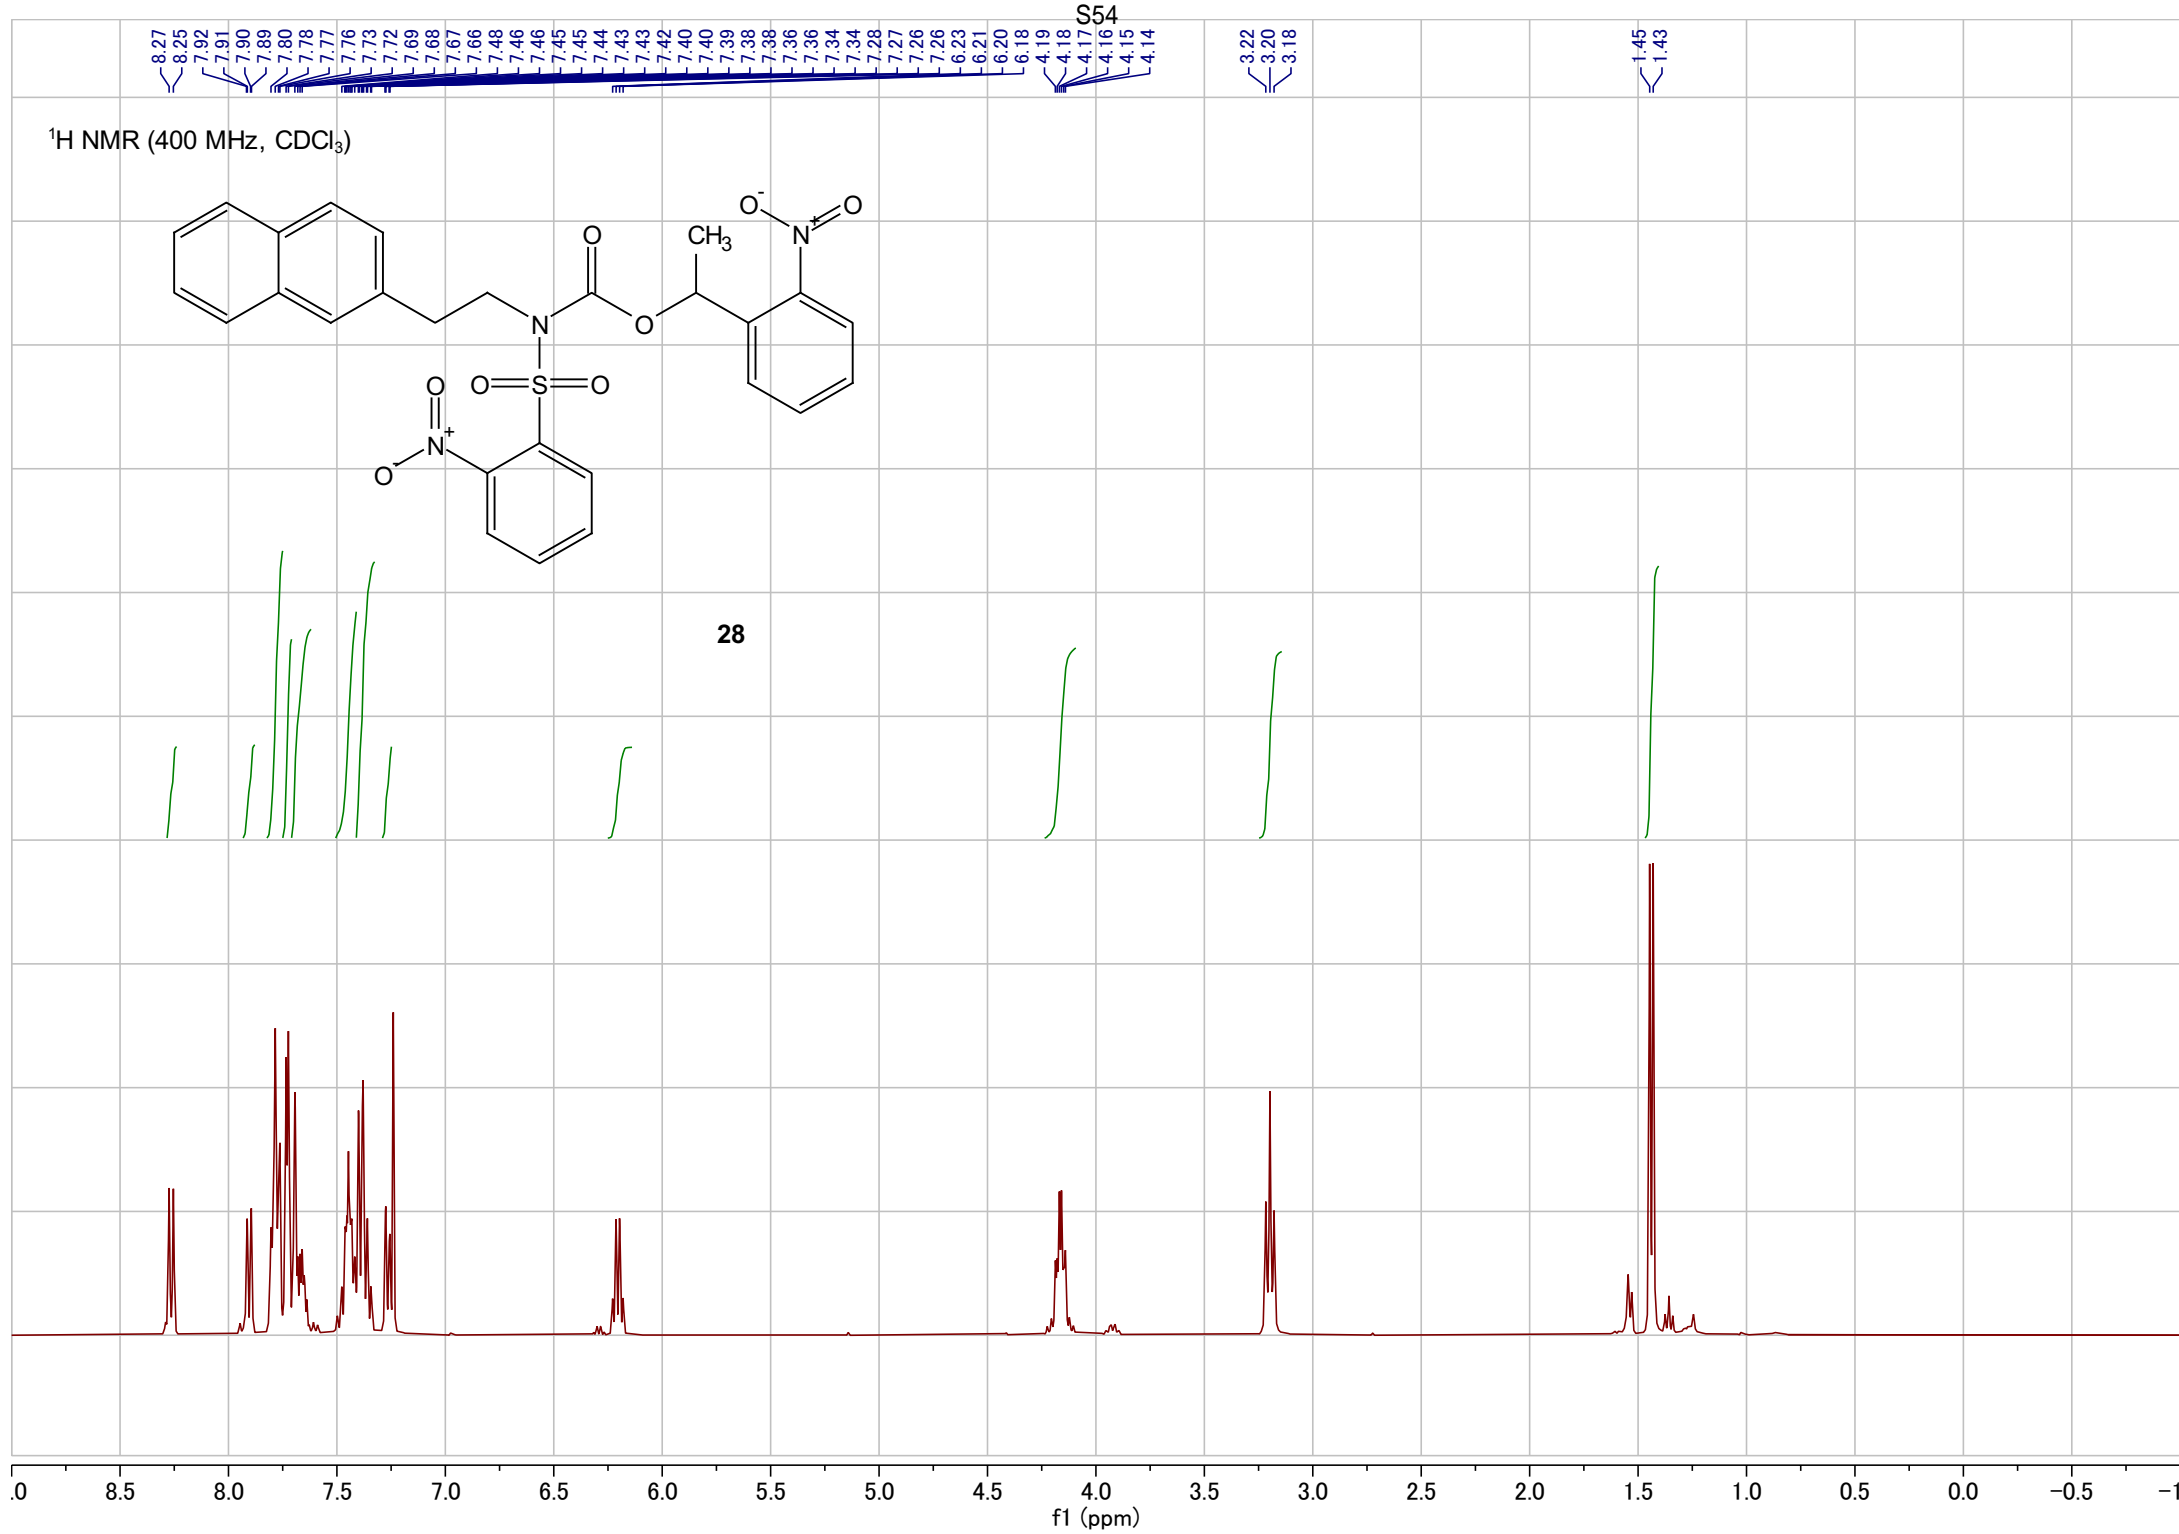

$^{13}\text{C}$  NMR (100 MHz,  $\text{CDCl}_3$ )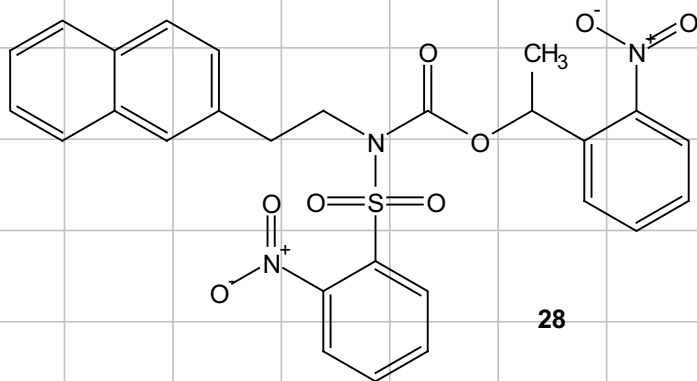

28

150.67  
147.82  
147.08  
136.66  
135.12  
134.58  
133.90  
133.74  
133.55  
132.91  
132.87  
131.77  
128.70  
128.25  
127.69  
127.65  
127.57  
127.38  
126.70  
126.10  
125.59  
124.63  
124.49  
124.44

72.28

49.32

36.85

21.67

180 170 160 150 140 130 120 110 100 90 80 70 60 50 40 30 20 10 0 -1

f1 (ppm)

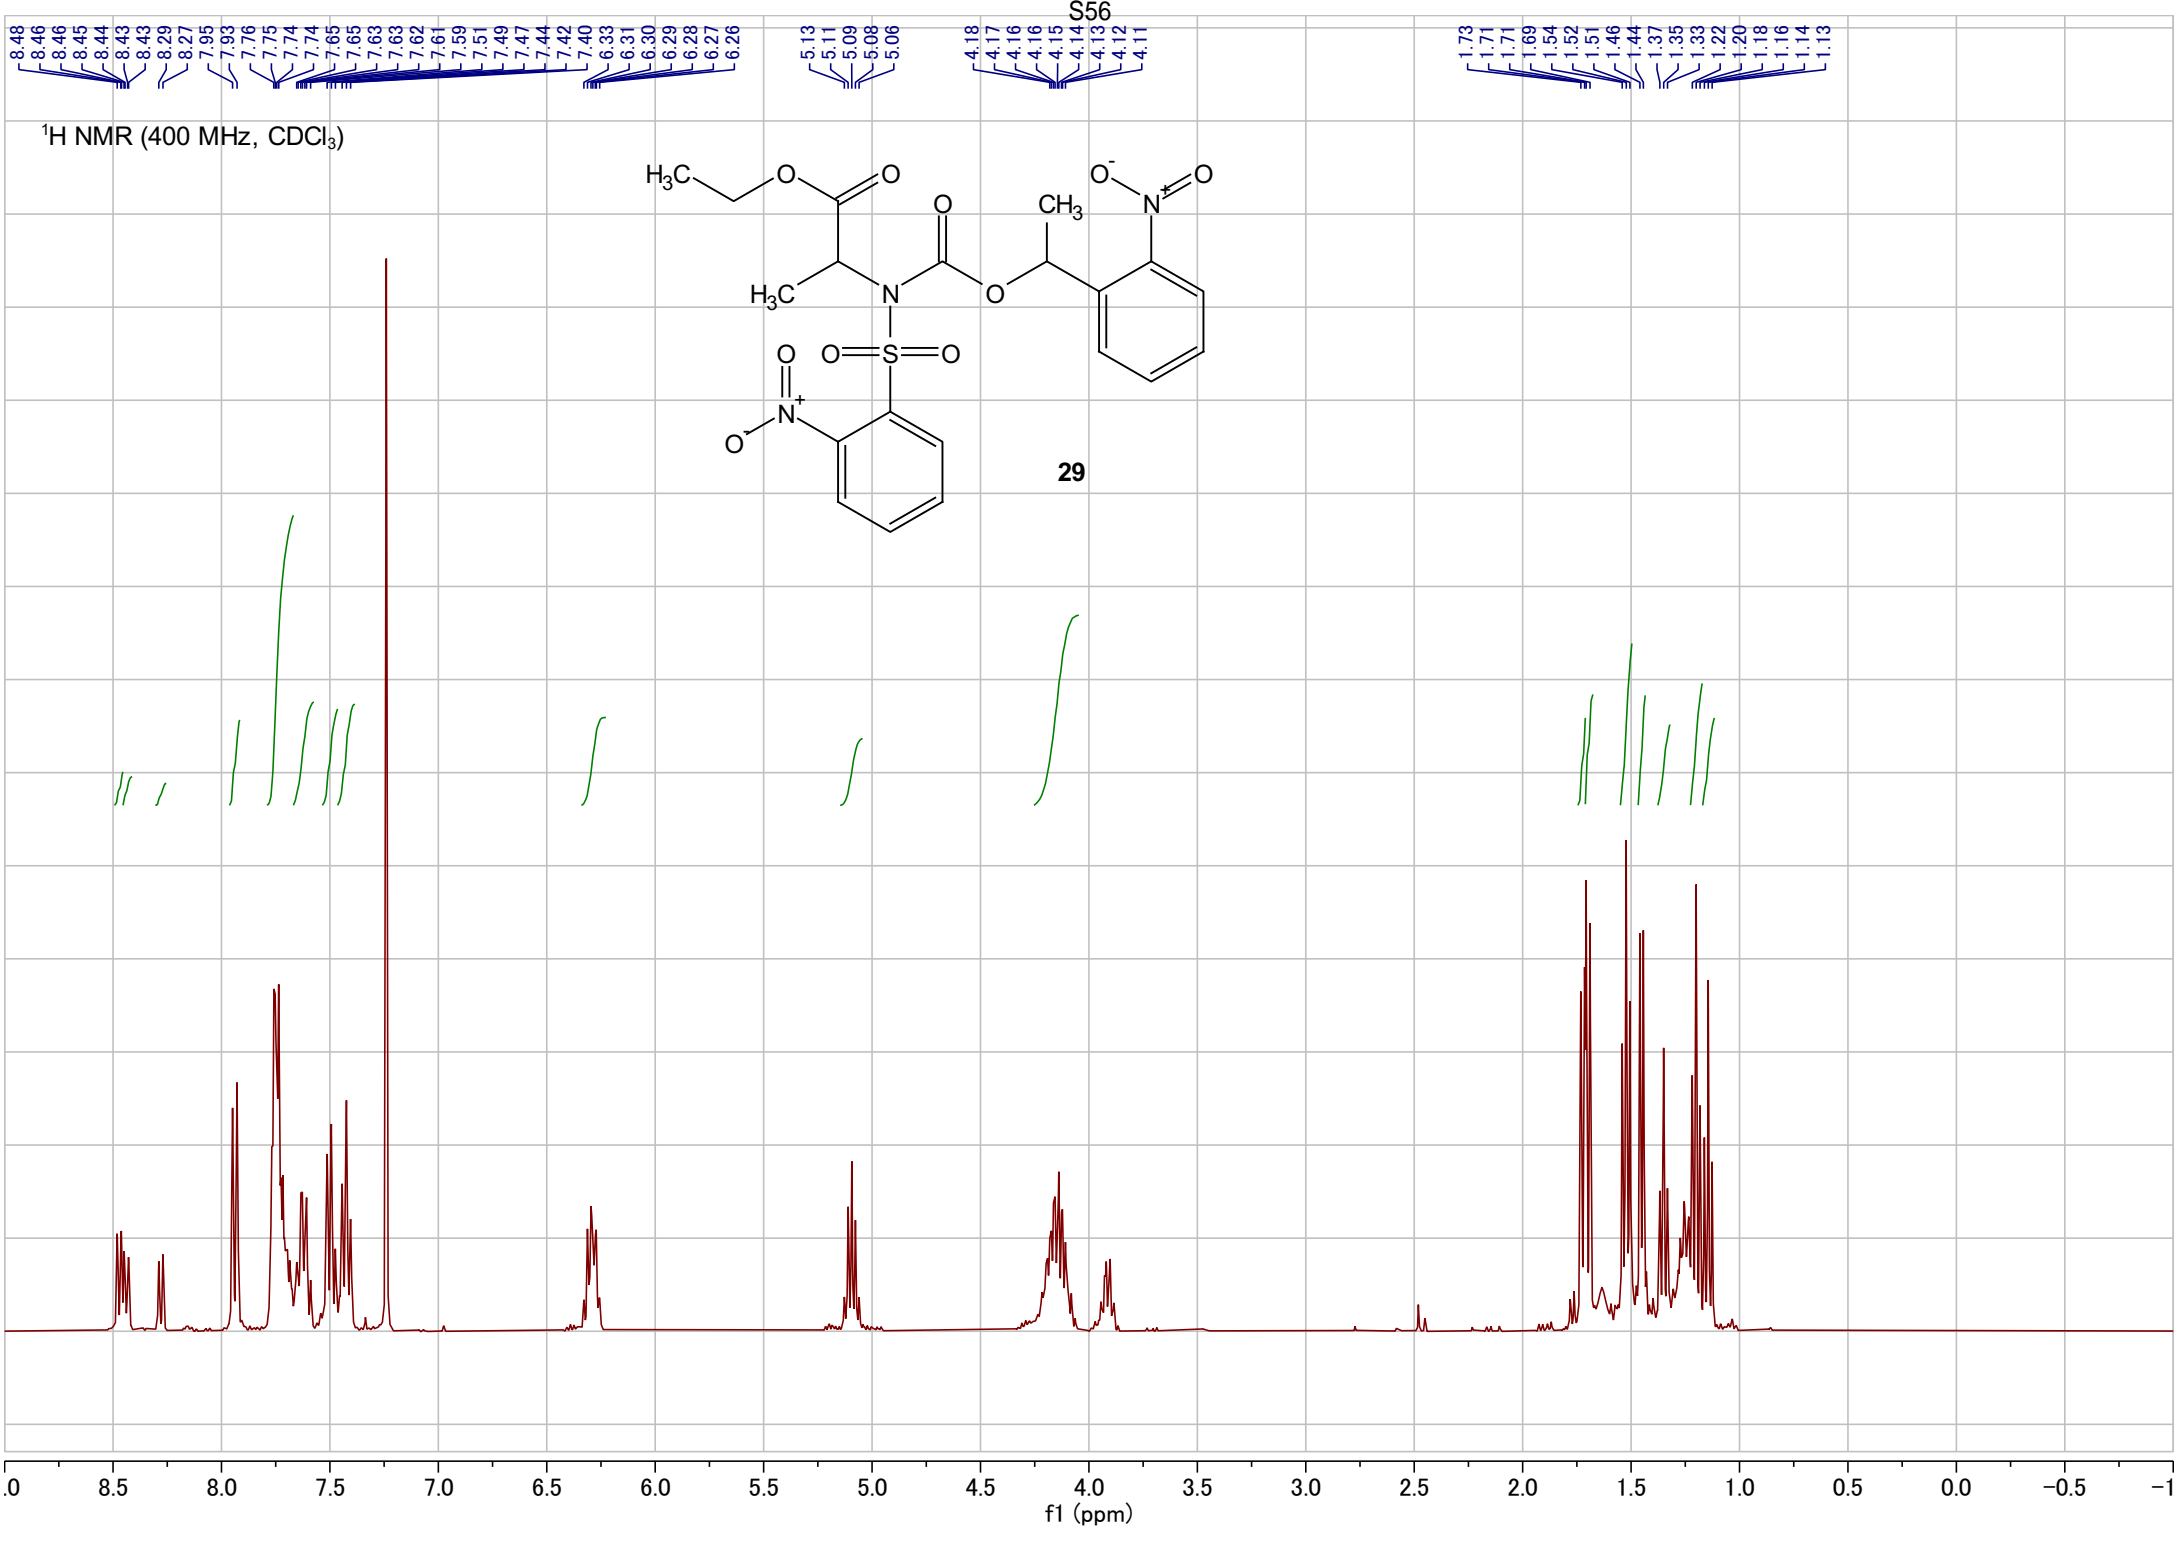



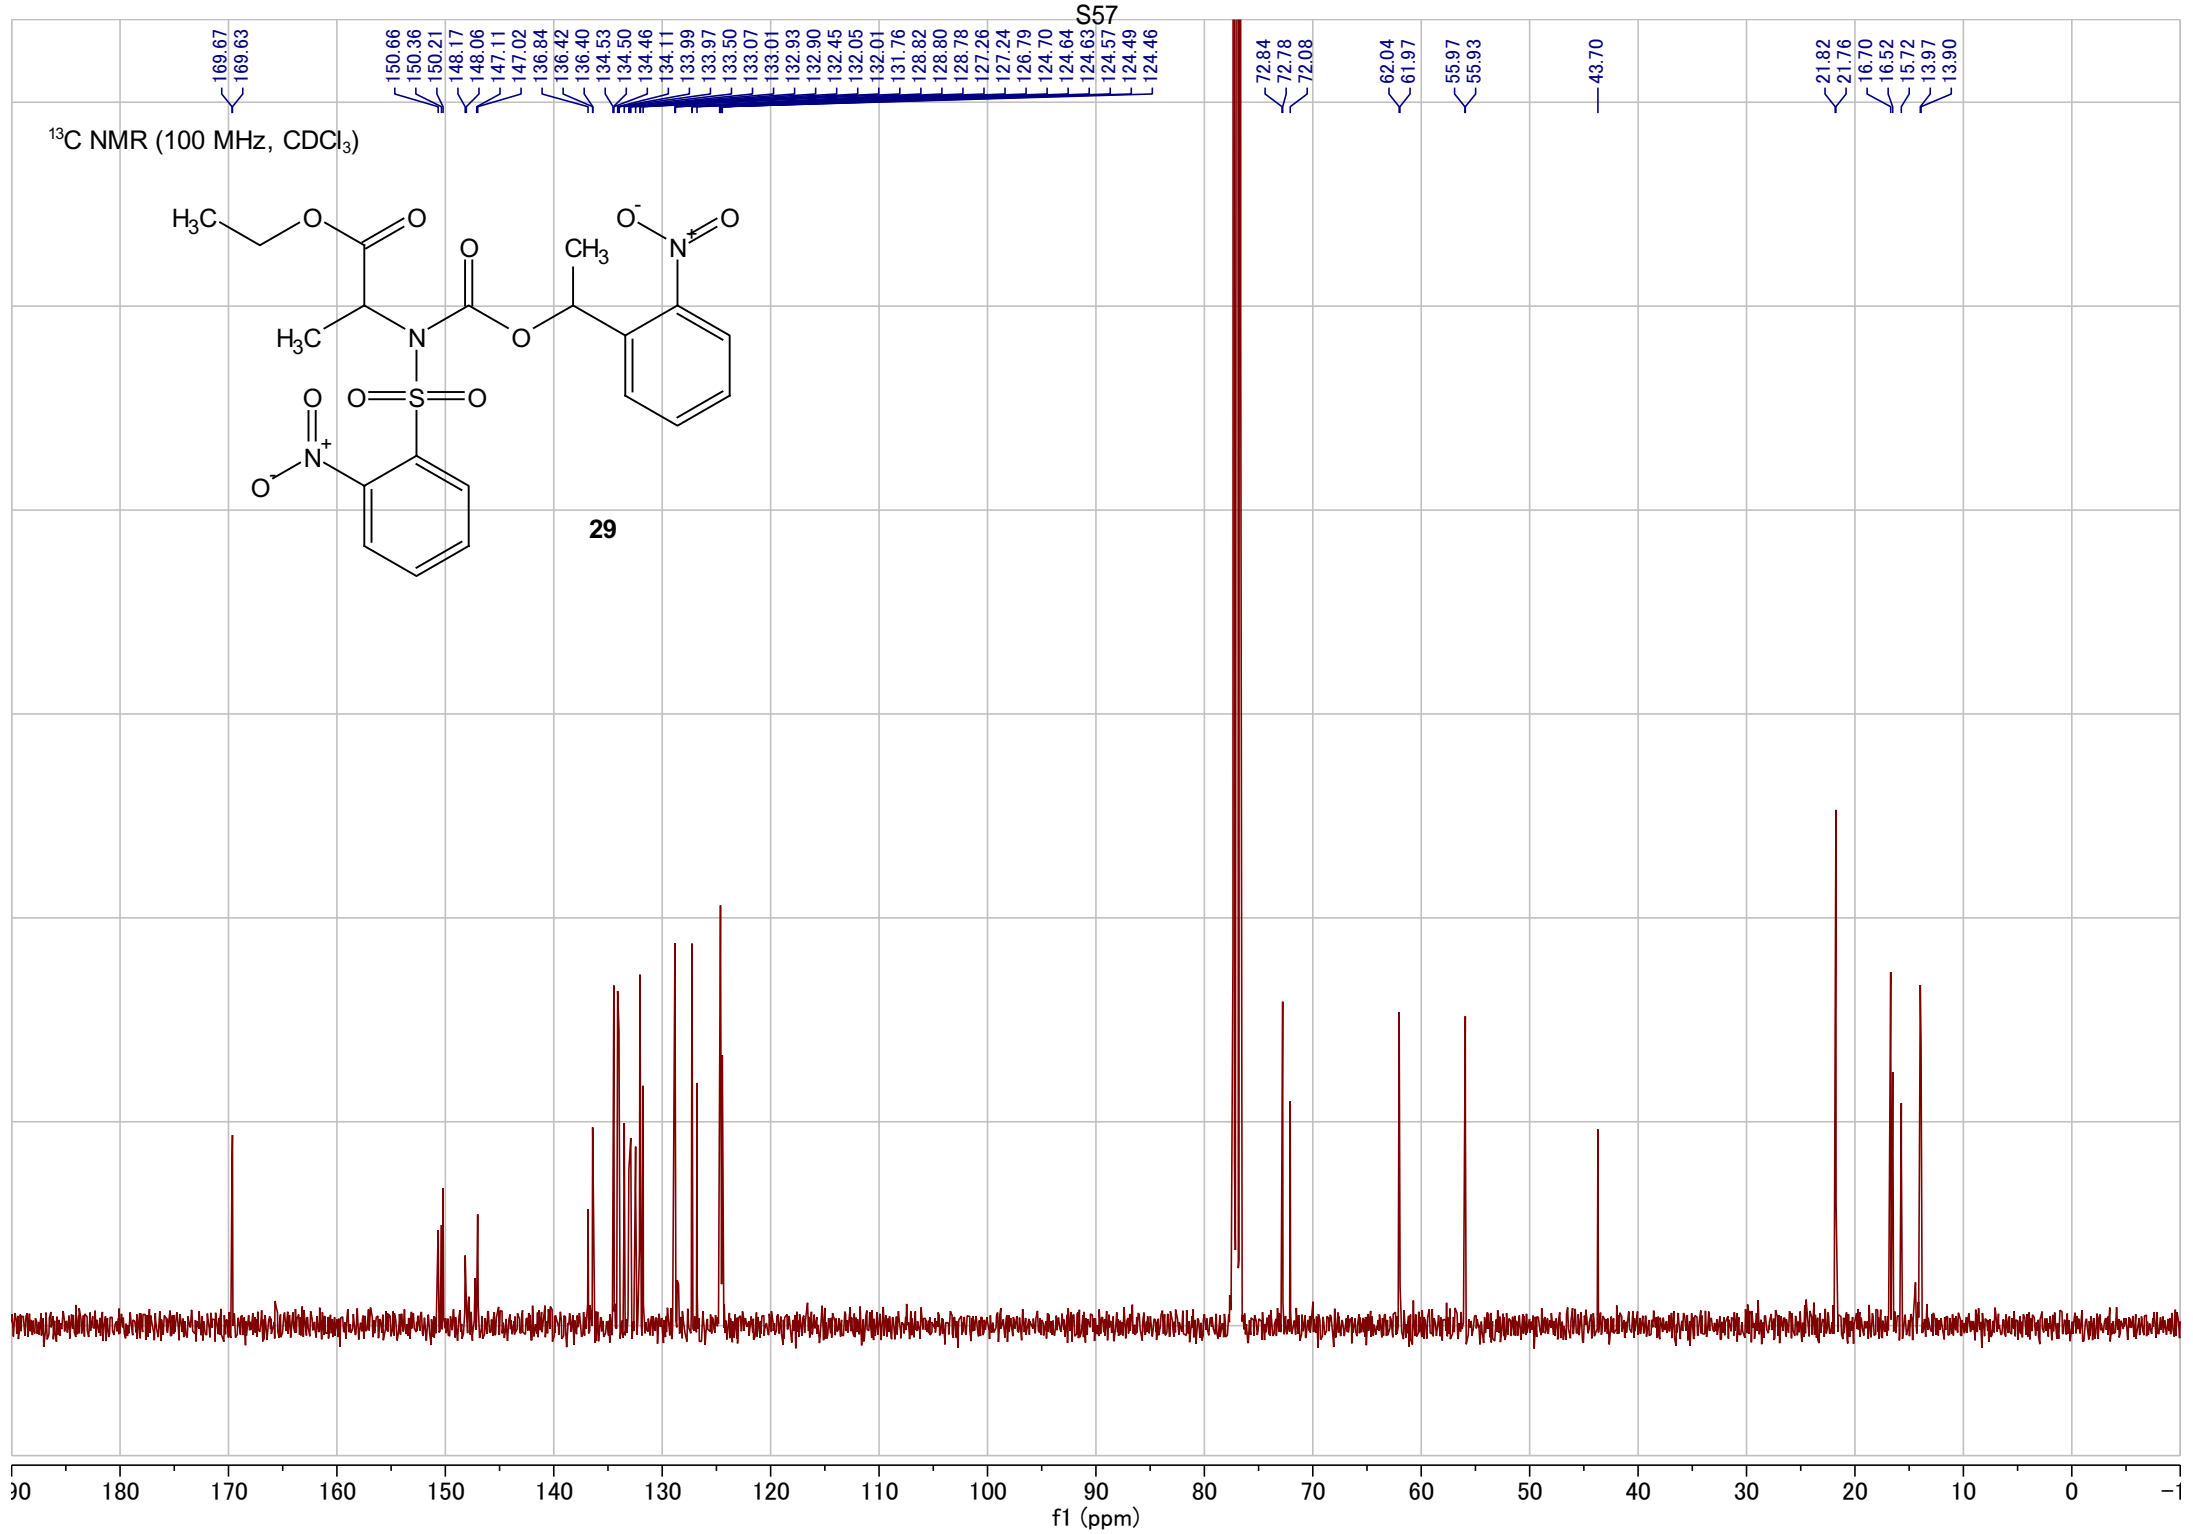

S58

<sup>1</sup>H NMR (400 MHz, CDCl<sub>3</sub>)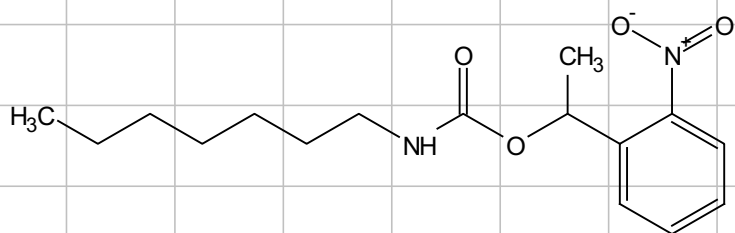

25a

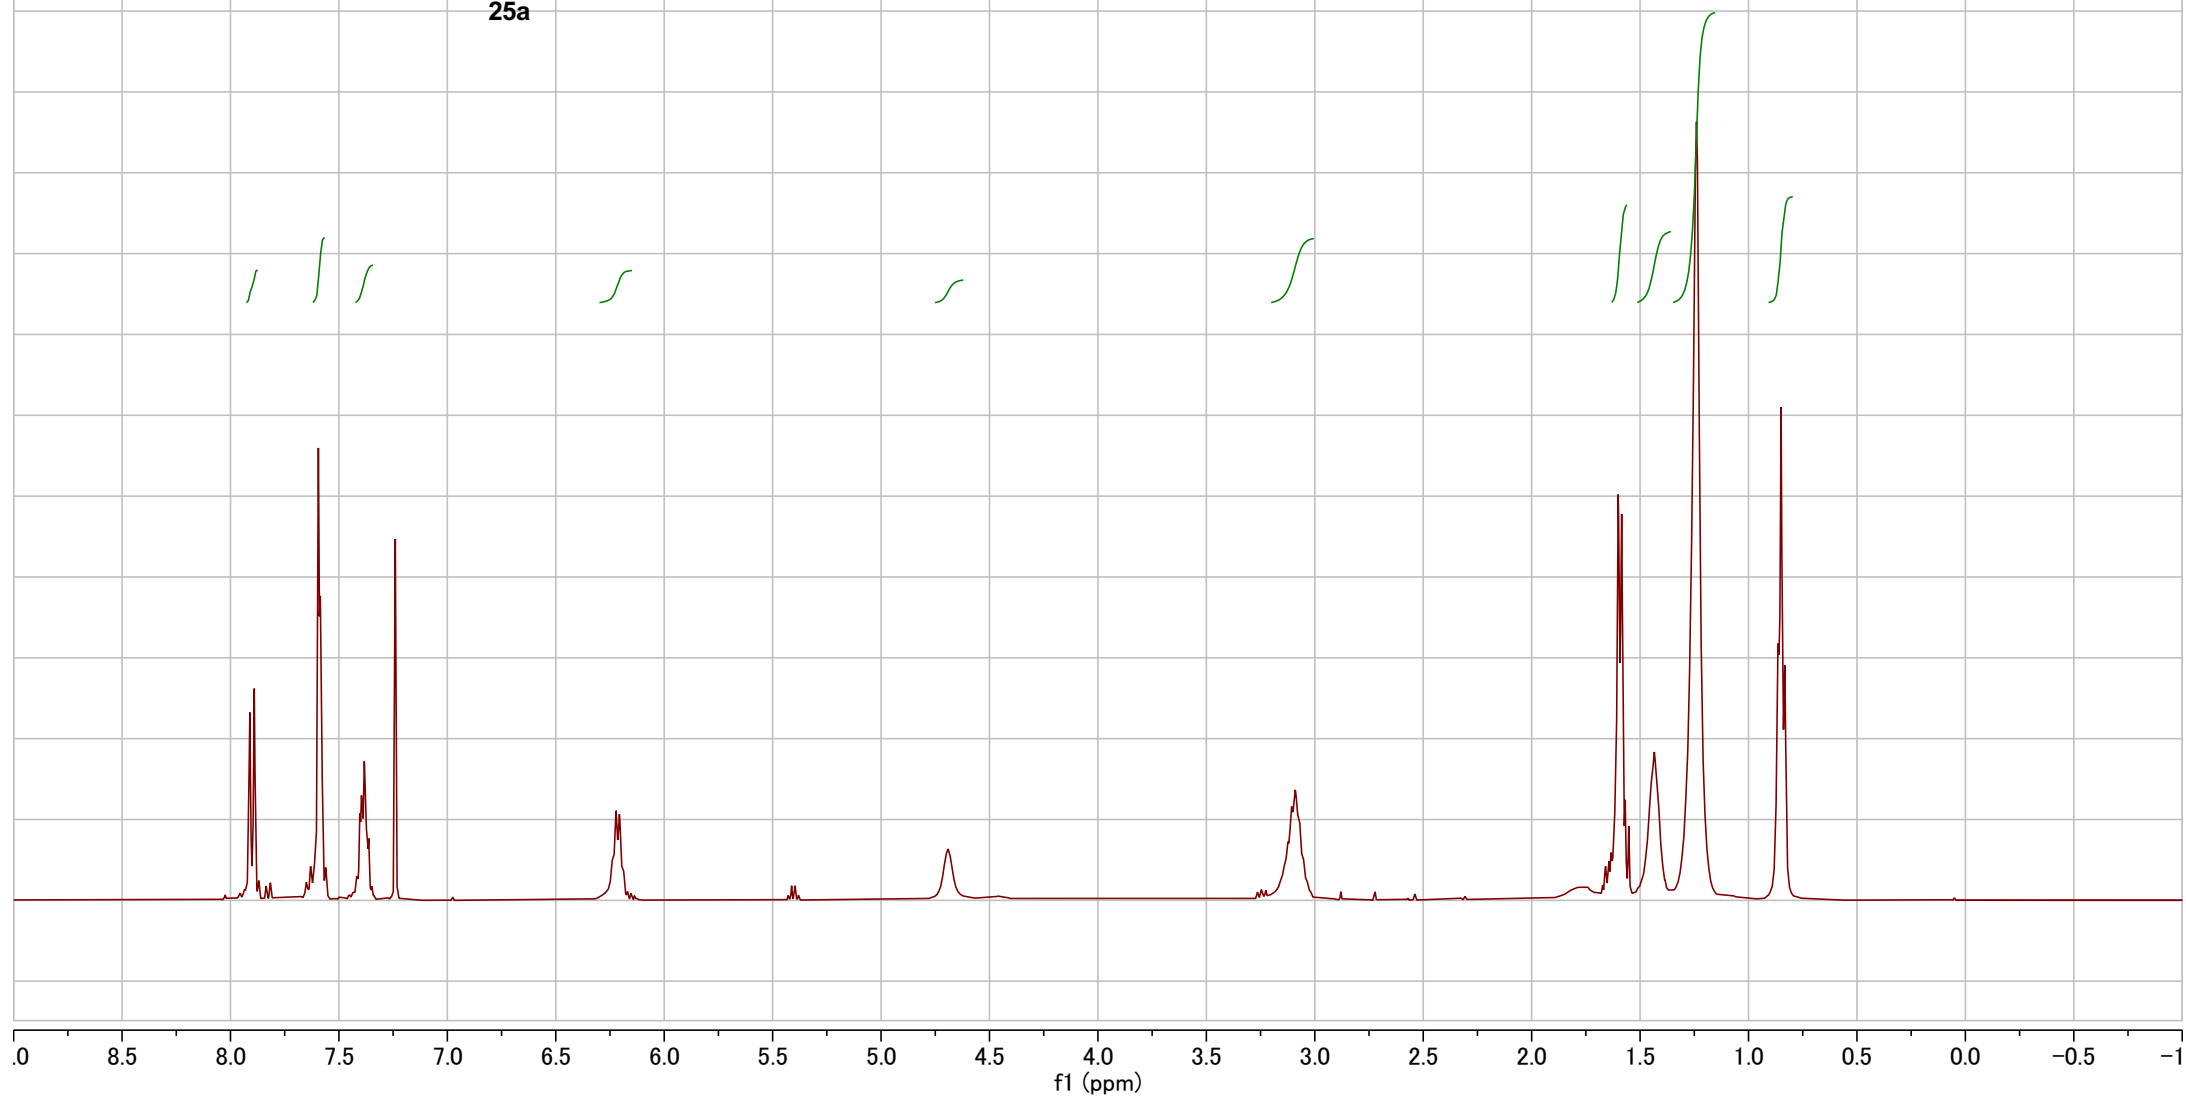

$^{13}\text{C}$  NMR (100 MHz,  $\text{CDCl}_3$ )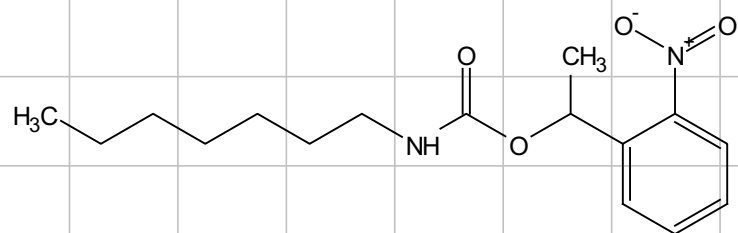

25a

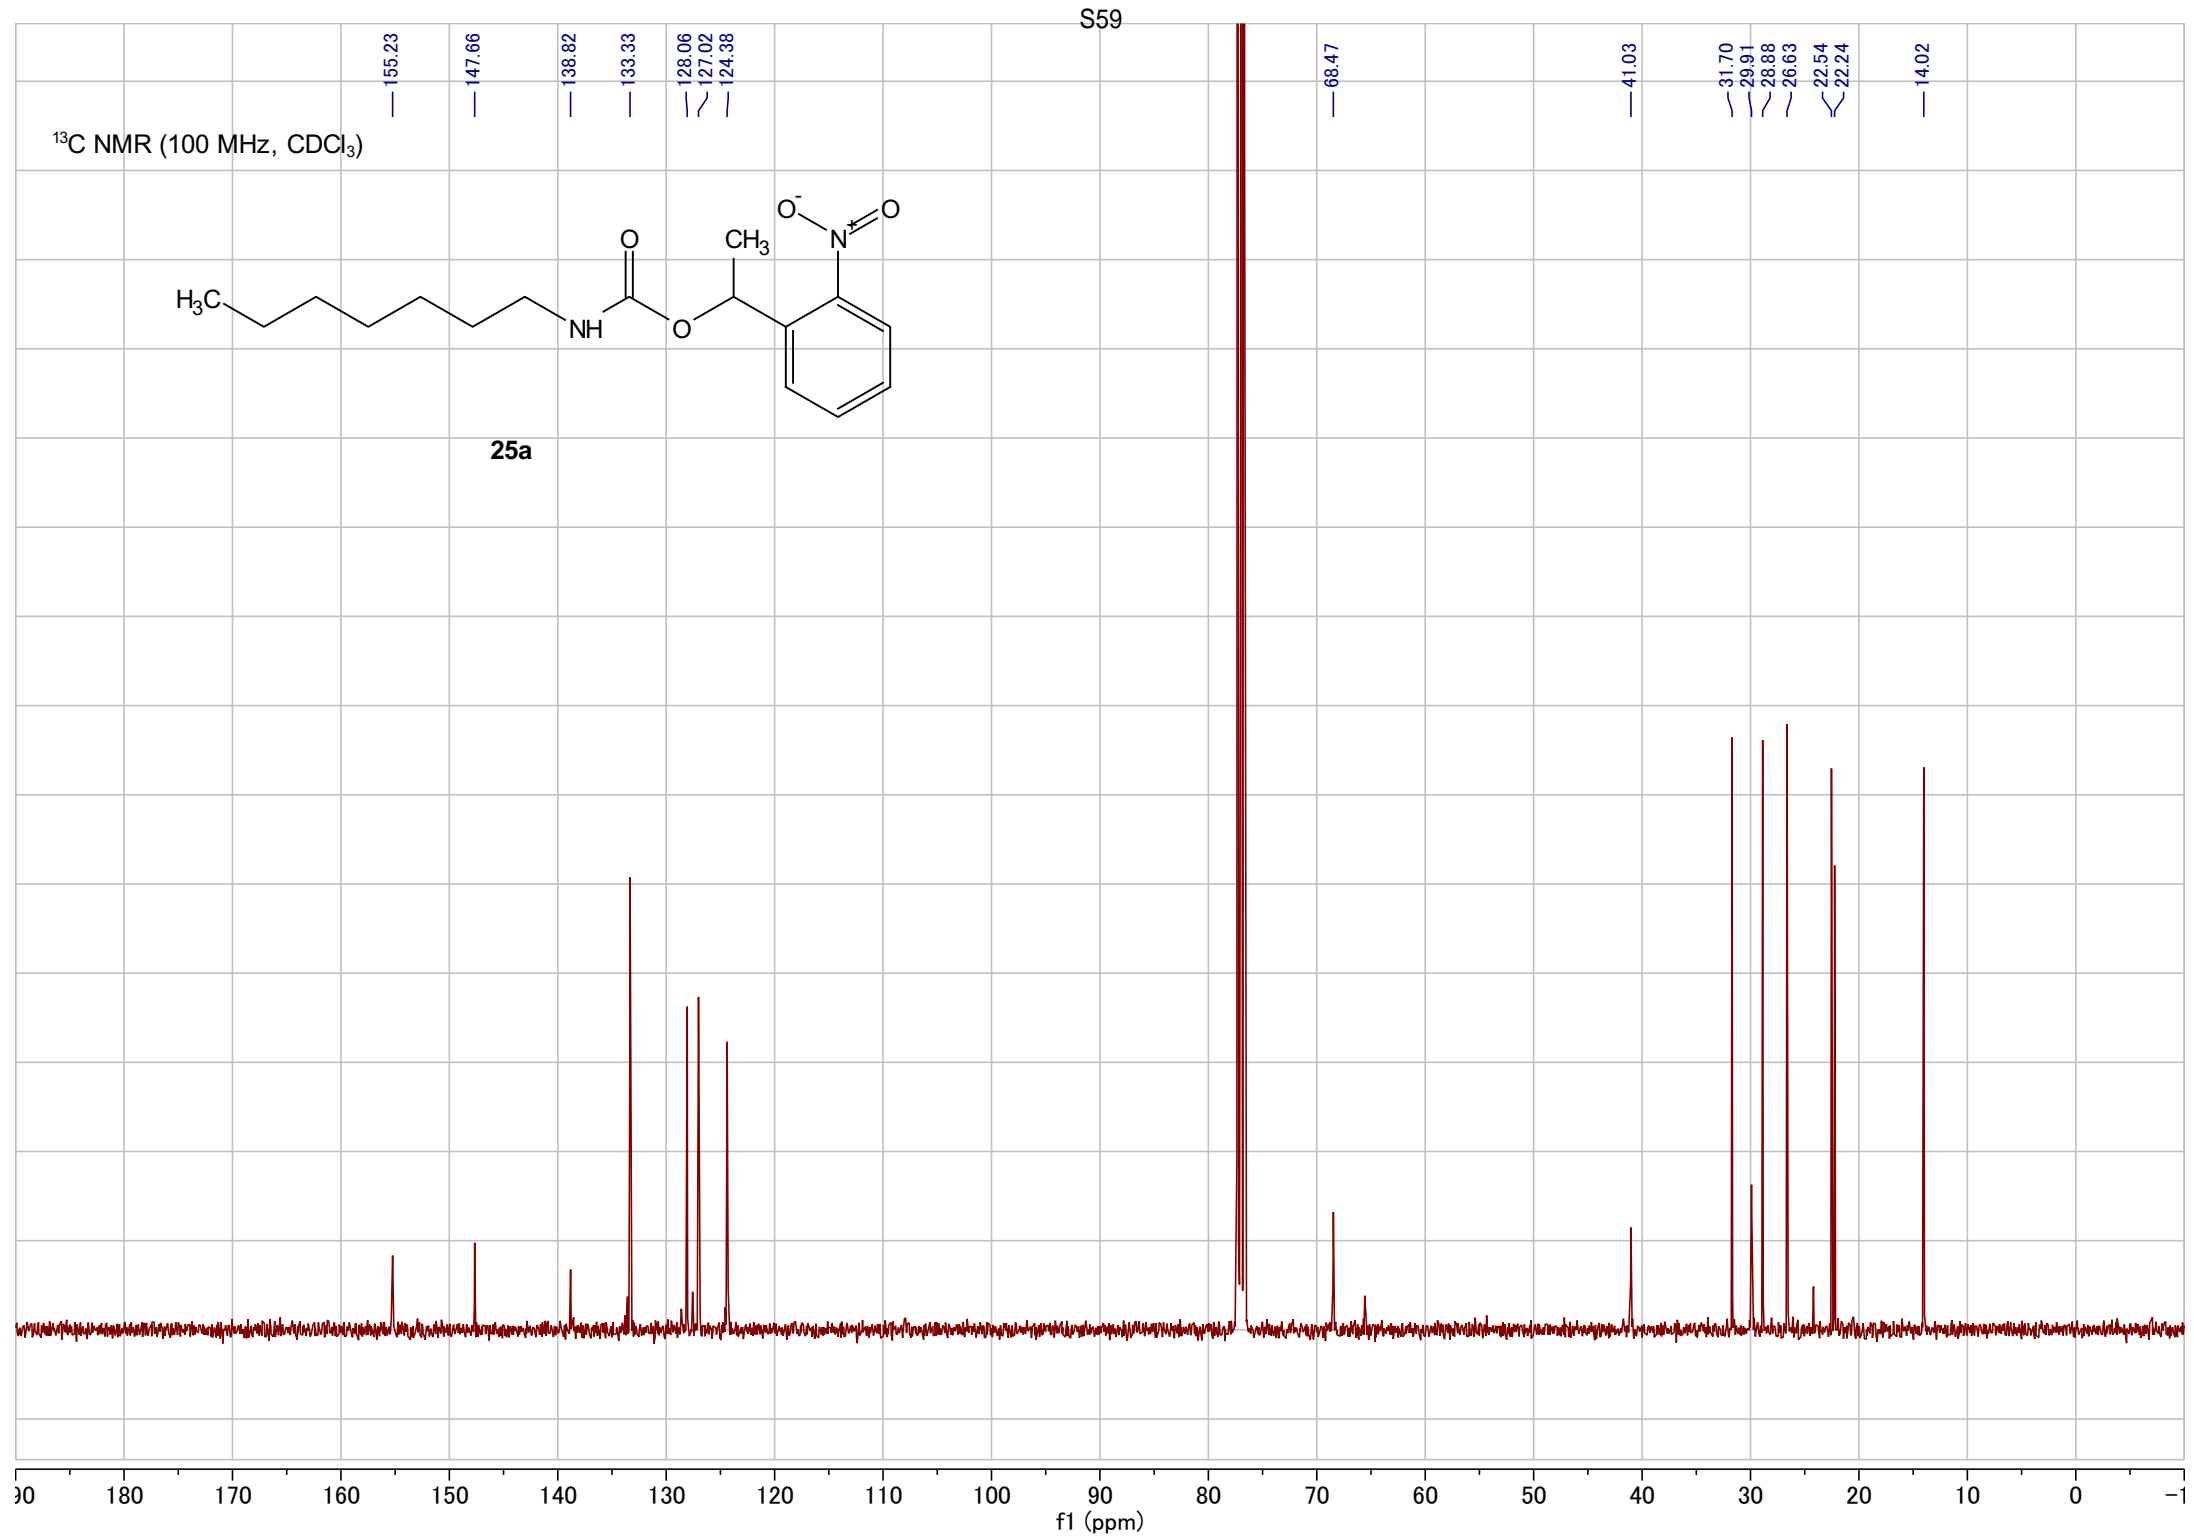

<sup>1</sup>H NMR (400 MHz, CDCl<sub>3</sub>)

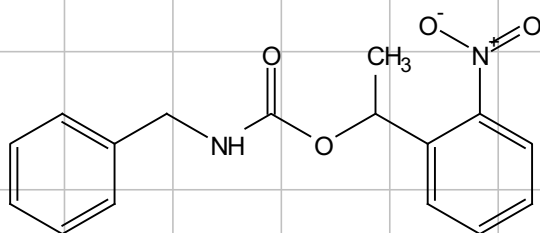

26a

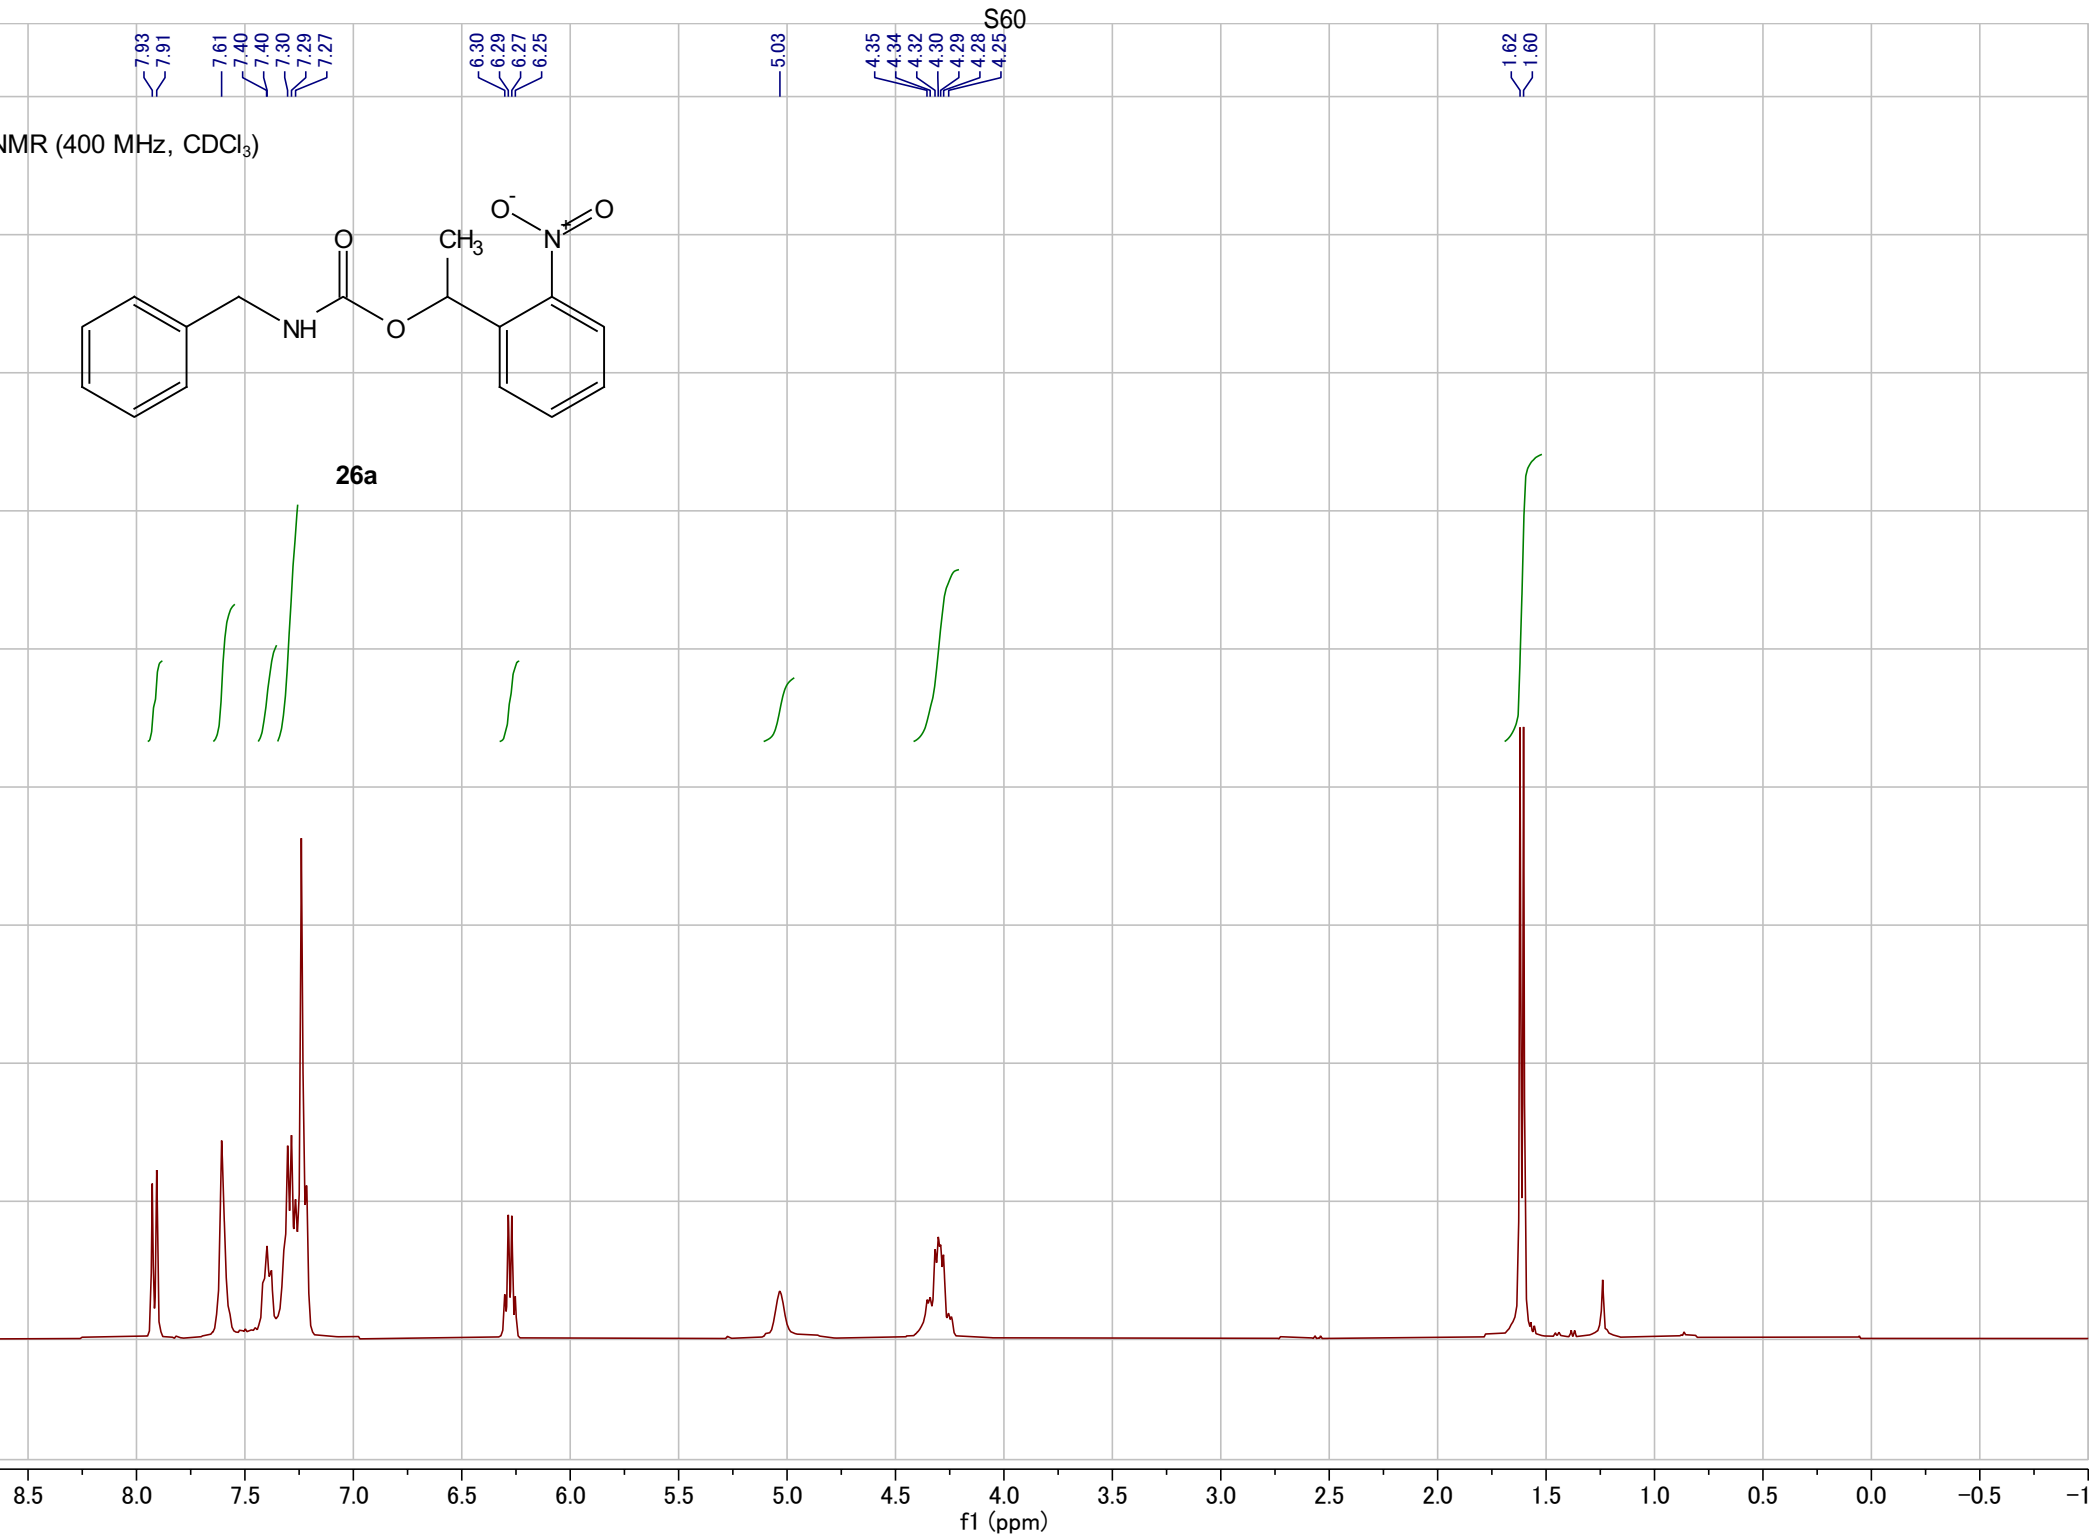

$^{13}\text{C}$  NMR (100 MHz,  $\text{CDCl}_3$ )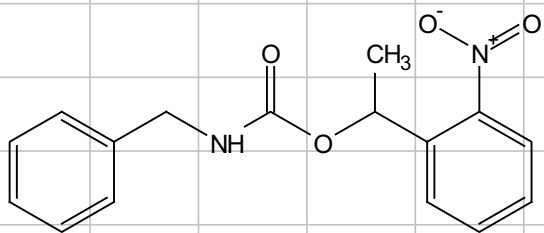

26a

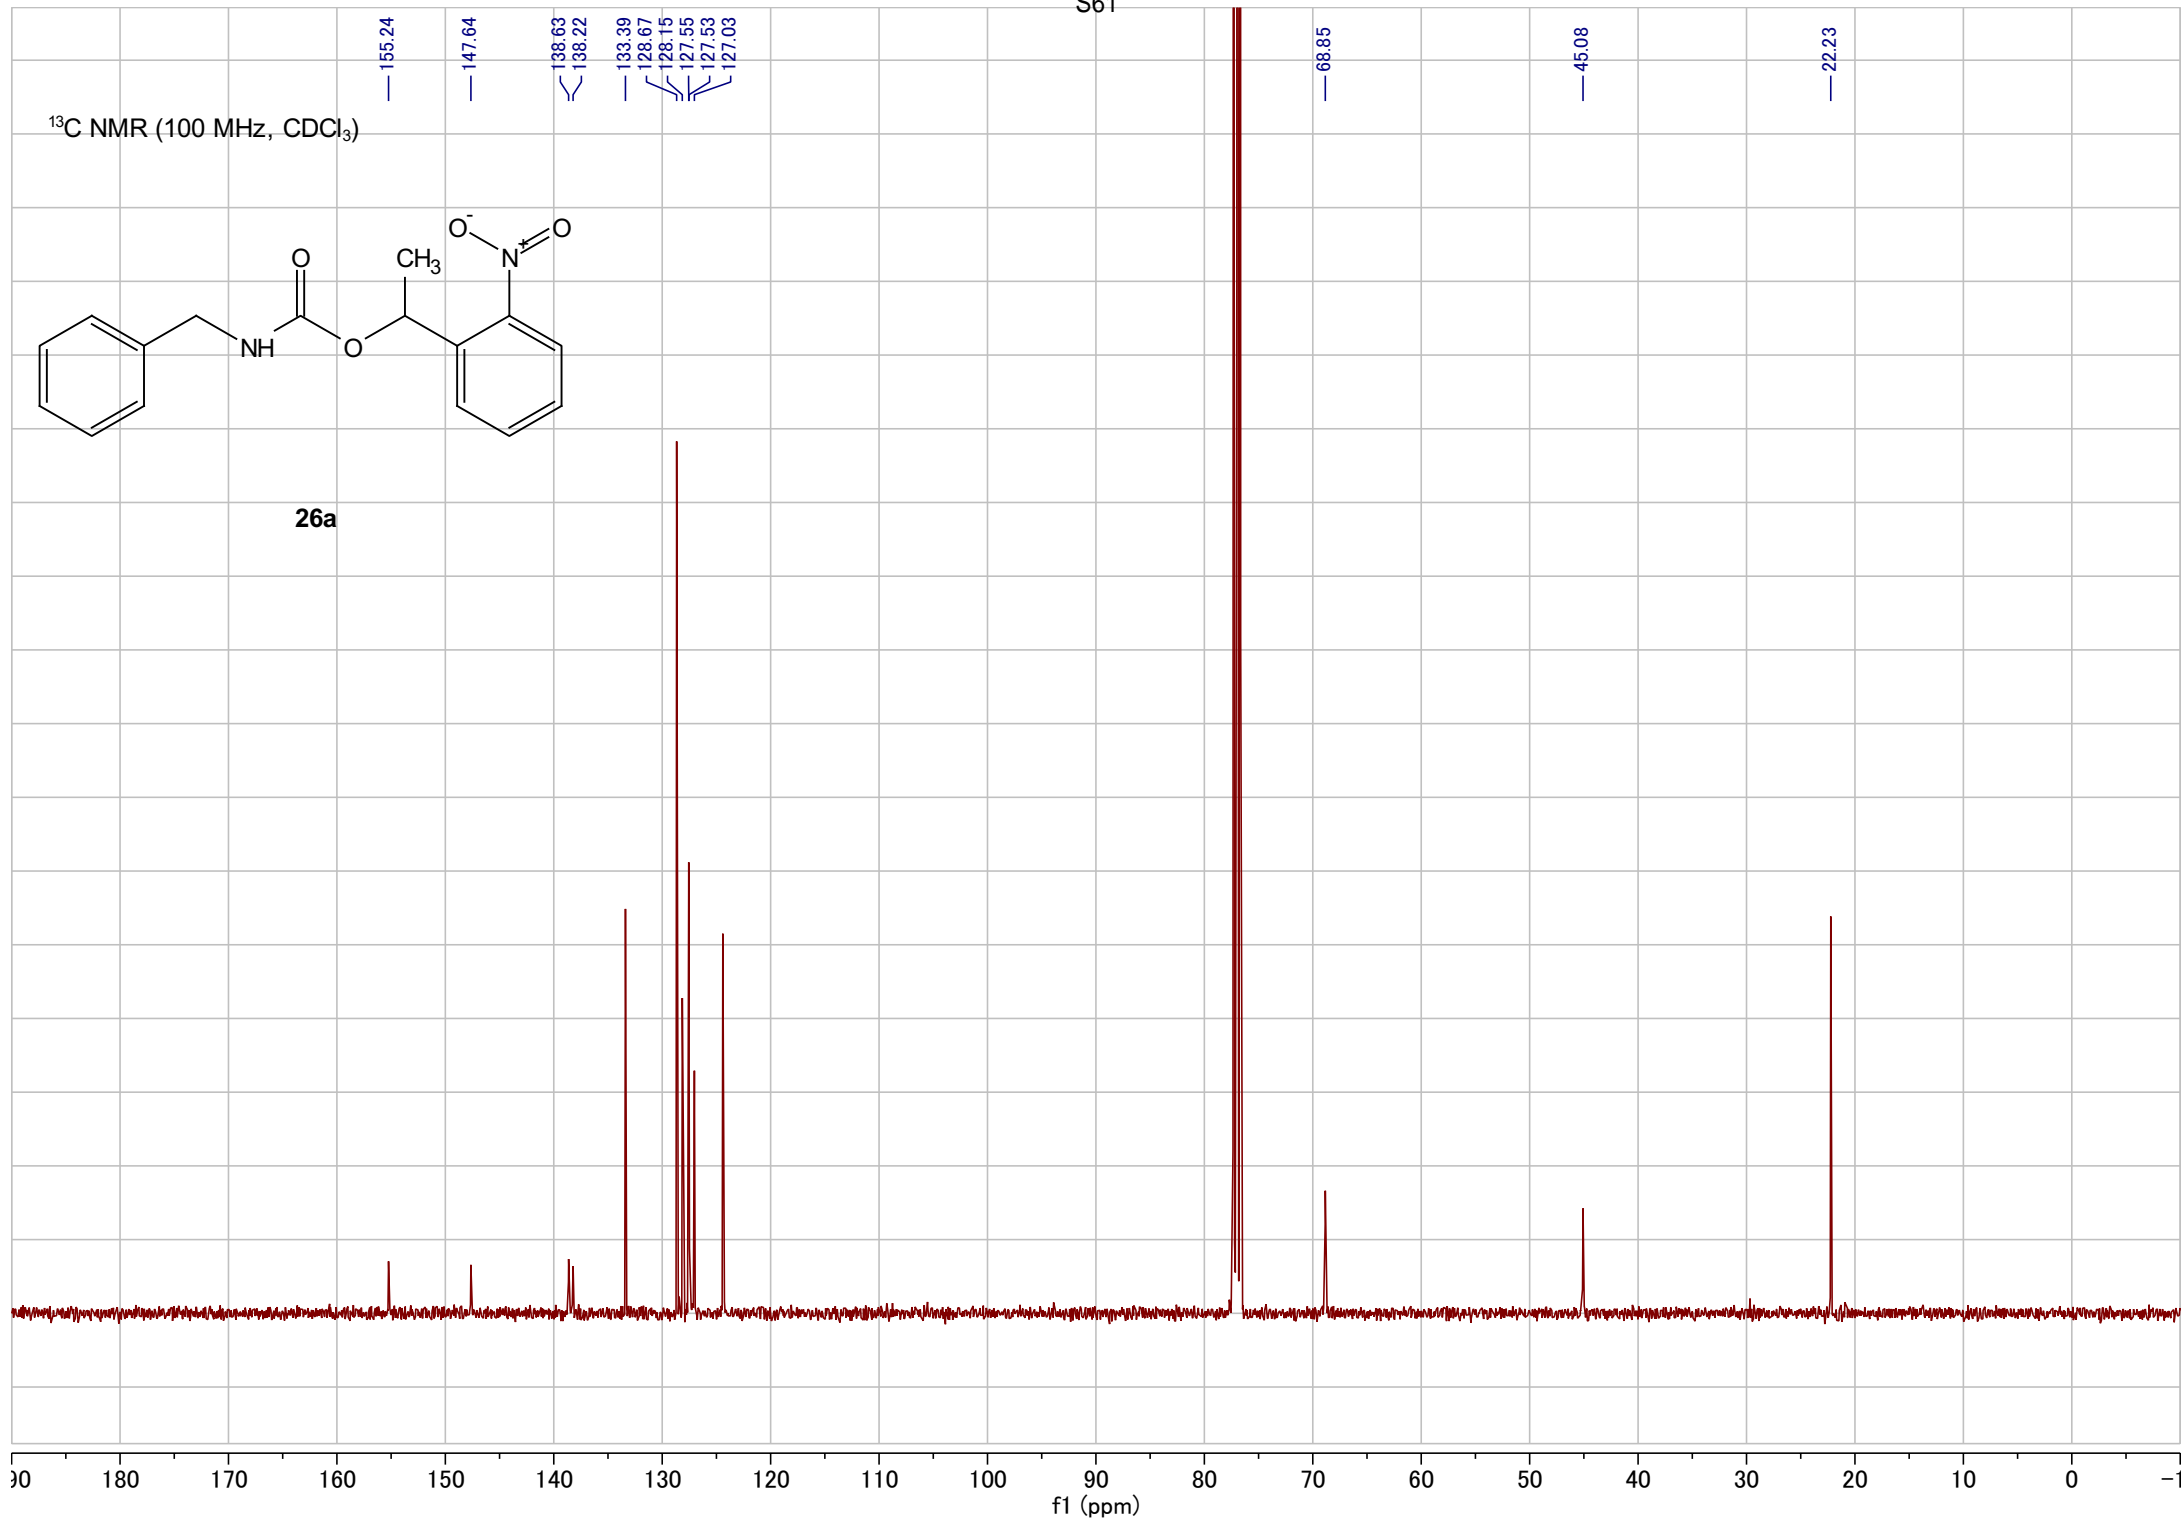

S62

 $^1\text{H NMR}$  (400 MHz,  $\text{CDCl}_3$ )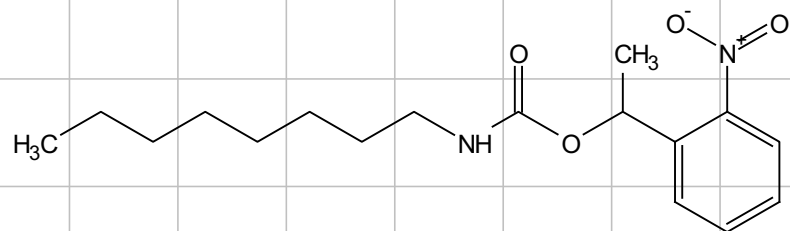

27a

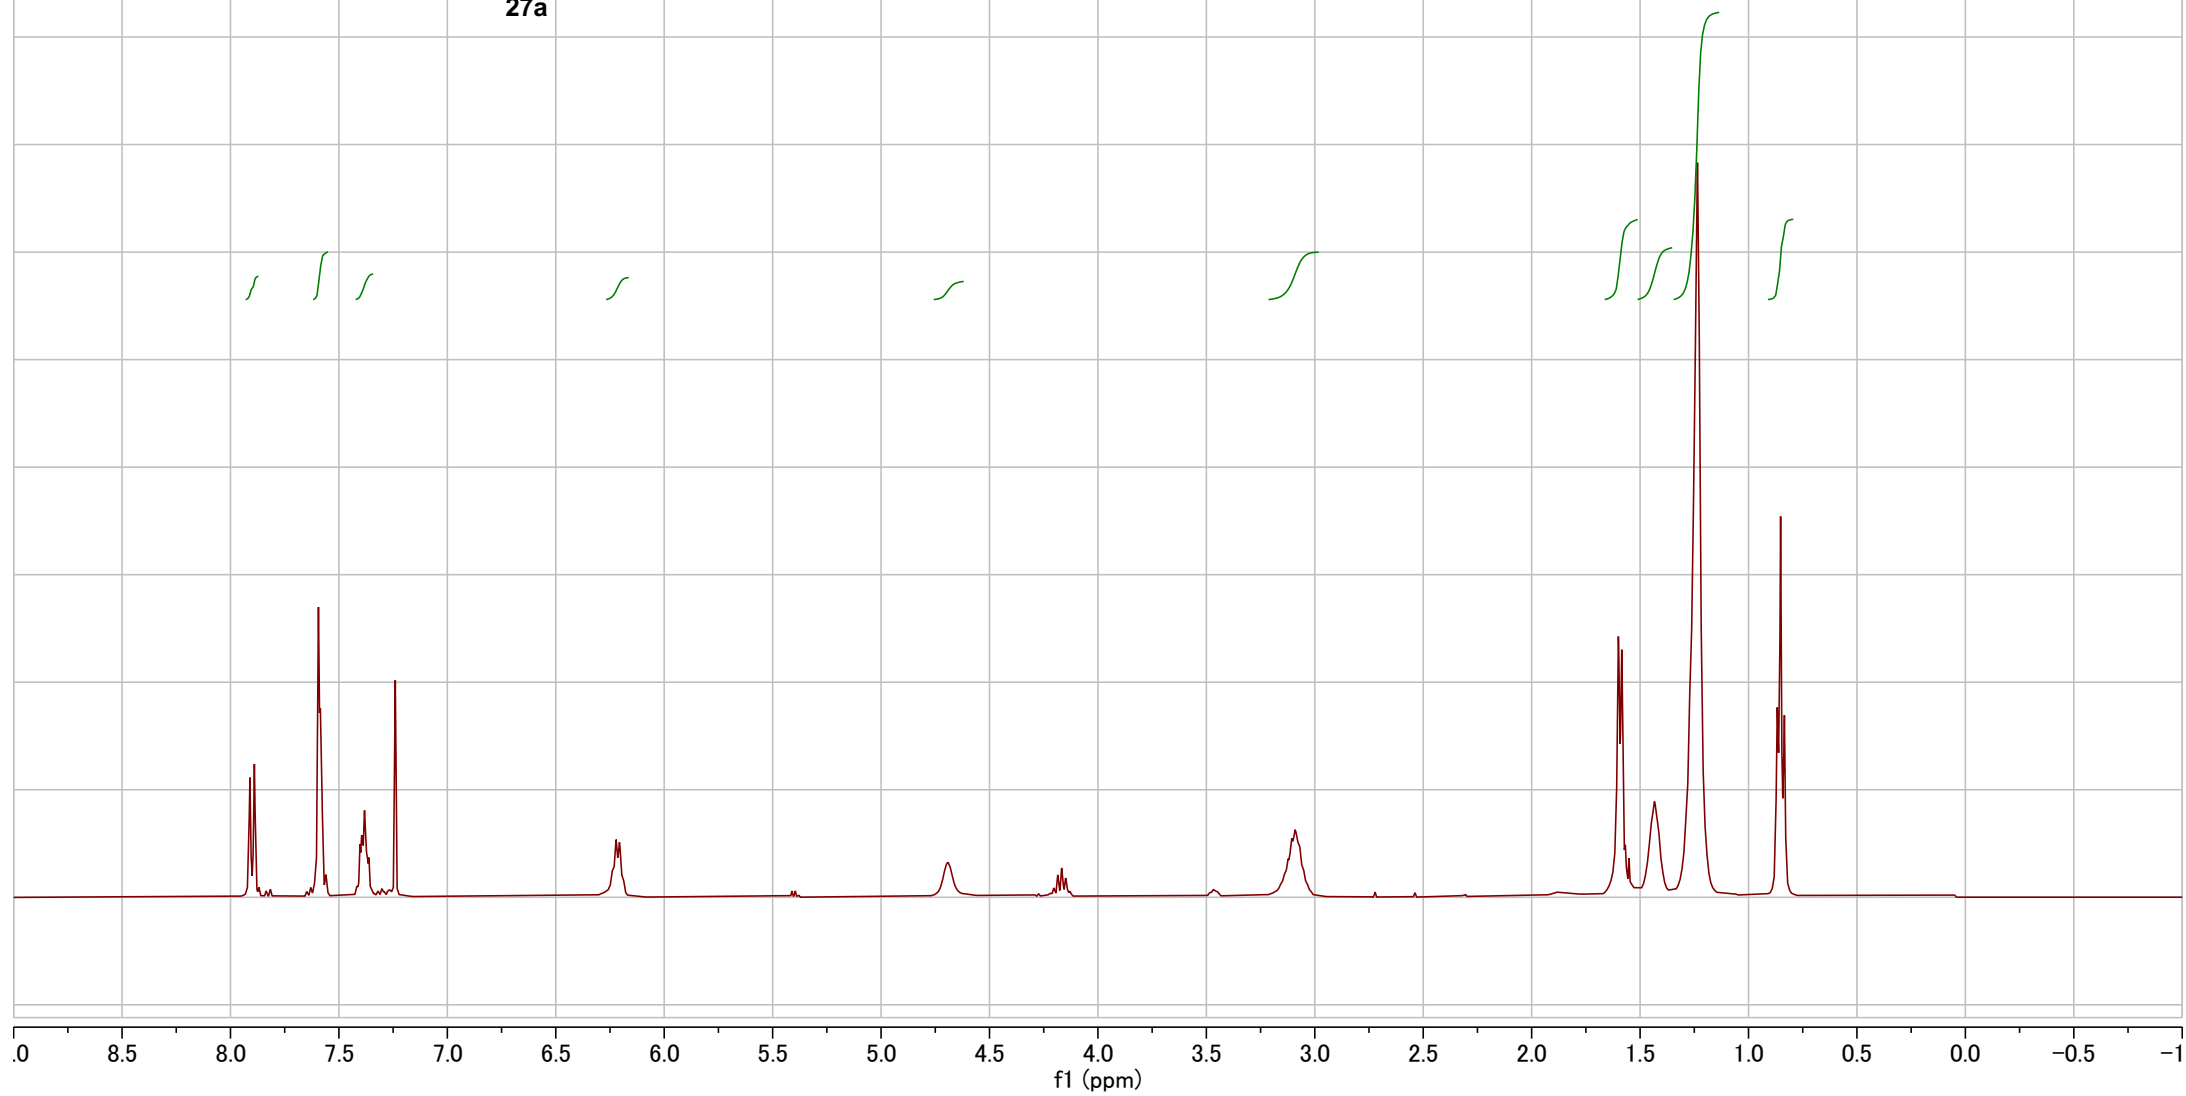

S63

<sup>13</sup>C NMR (100 MHz, CDCl<sub>3</sub>)

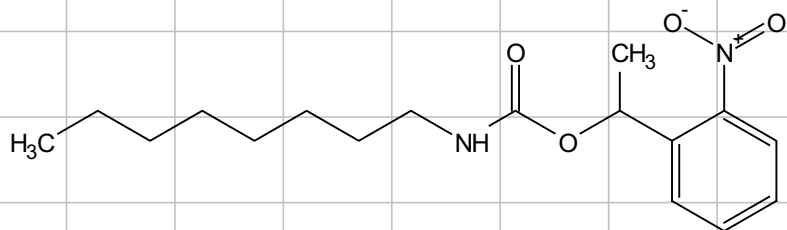

27a

155.23

147.66

138.82

133.34

128.06

127.02

124.38

68.47

41.03

31.74

29.91

29.18

29.16

26.68

22.60

22.24

14.05

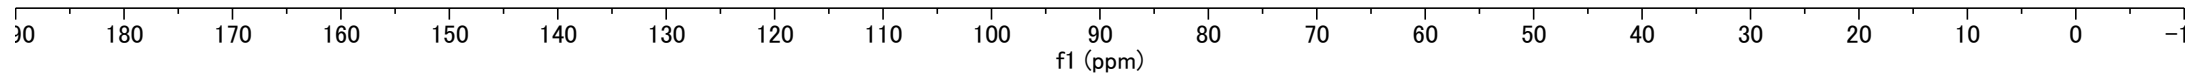

S64

<sup>1</sup>H NMR (400 MHz, CDCl<sub>3</sub>)

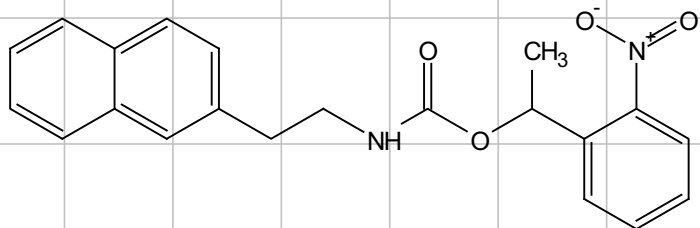

**28a**

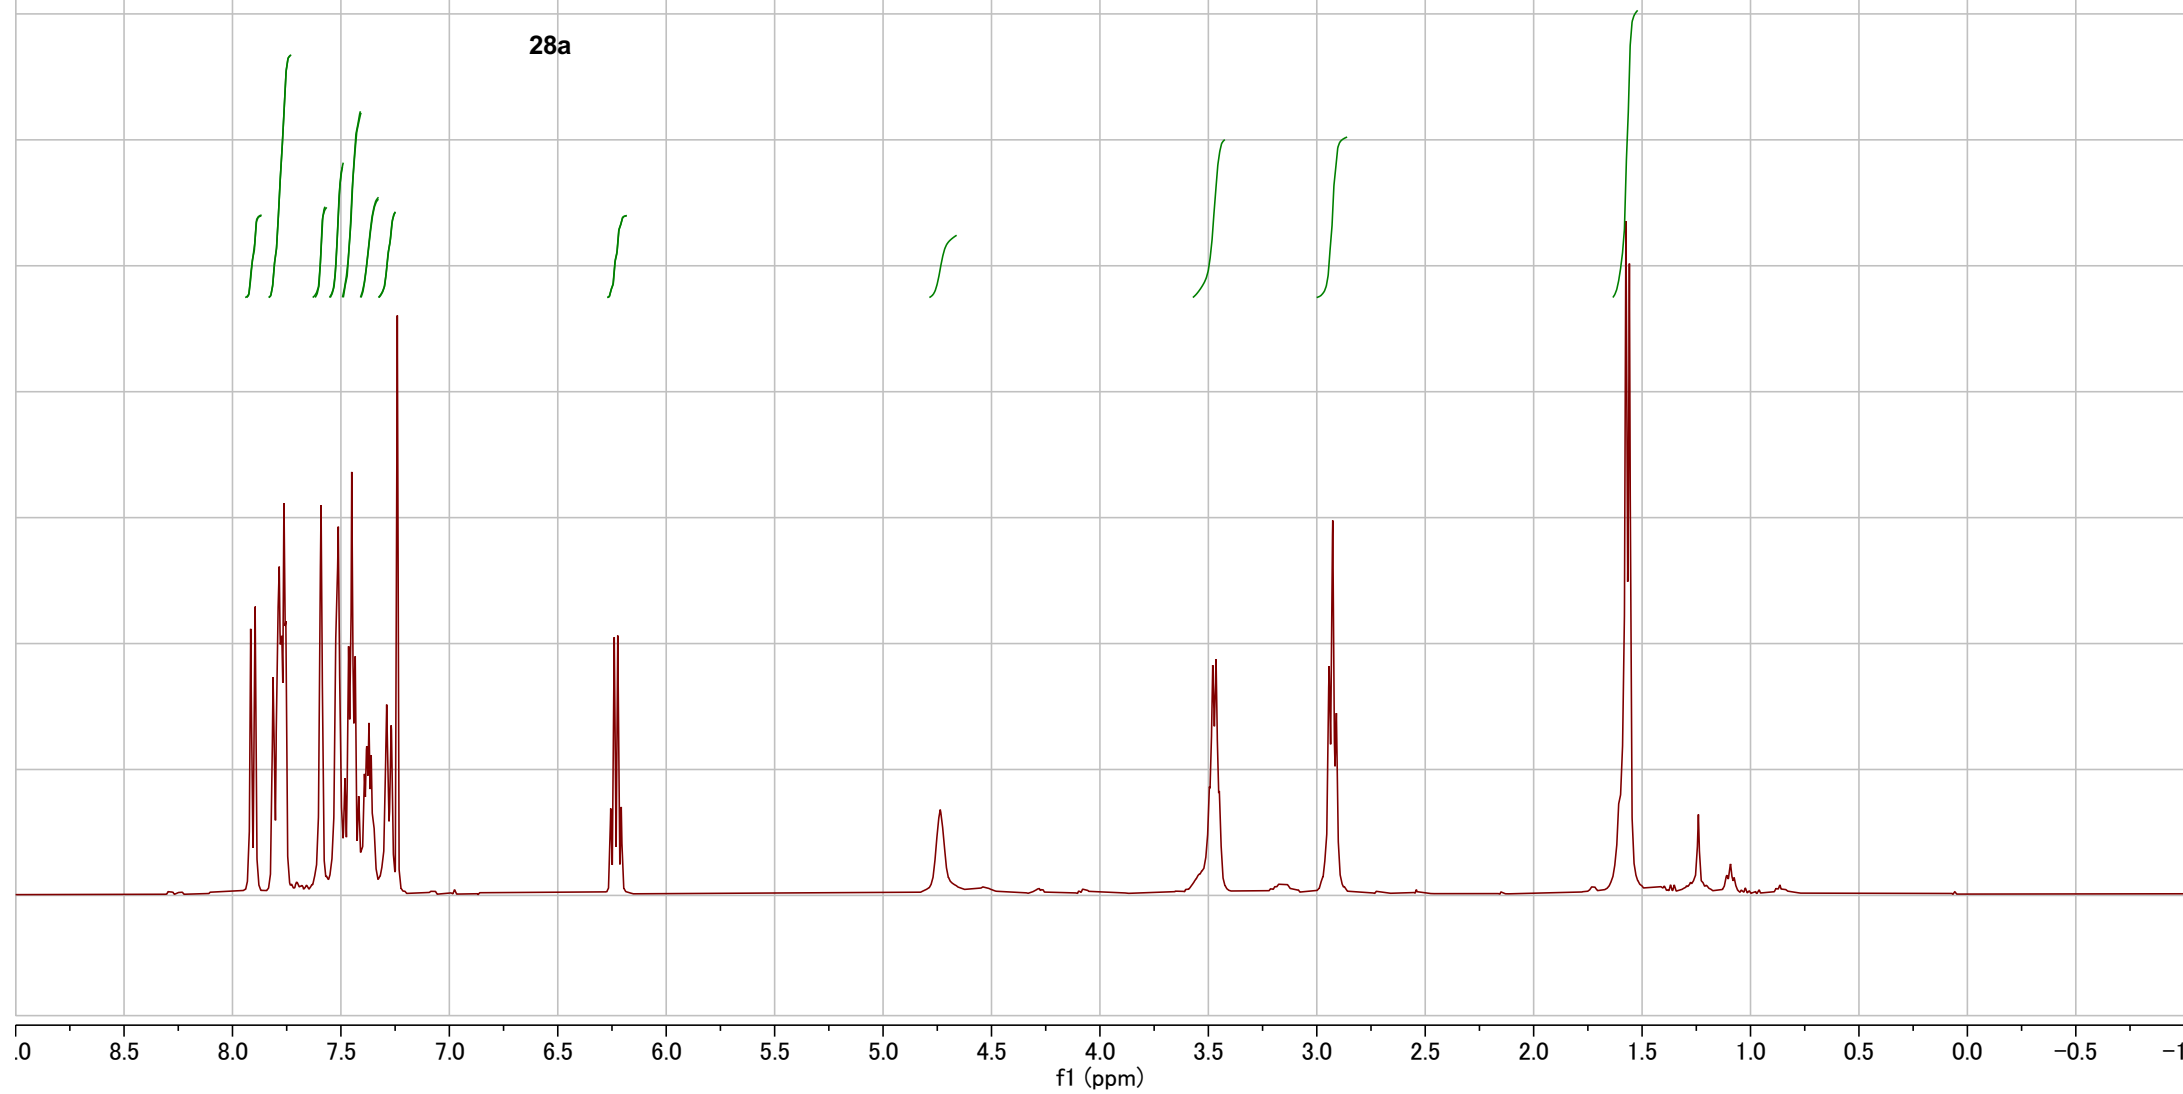



$^{13}\text{C}$  NMR (100 MHz,  $\text{CDCl}_3$ )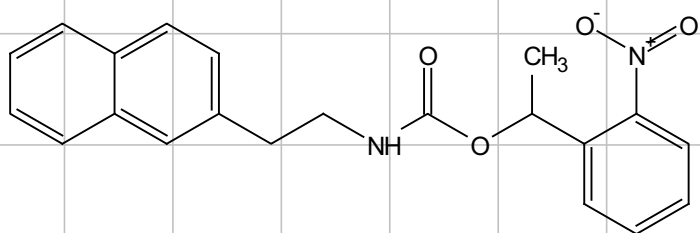

28a

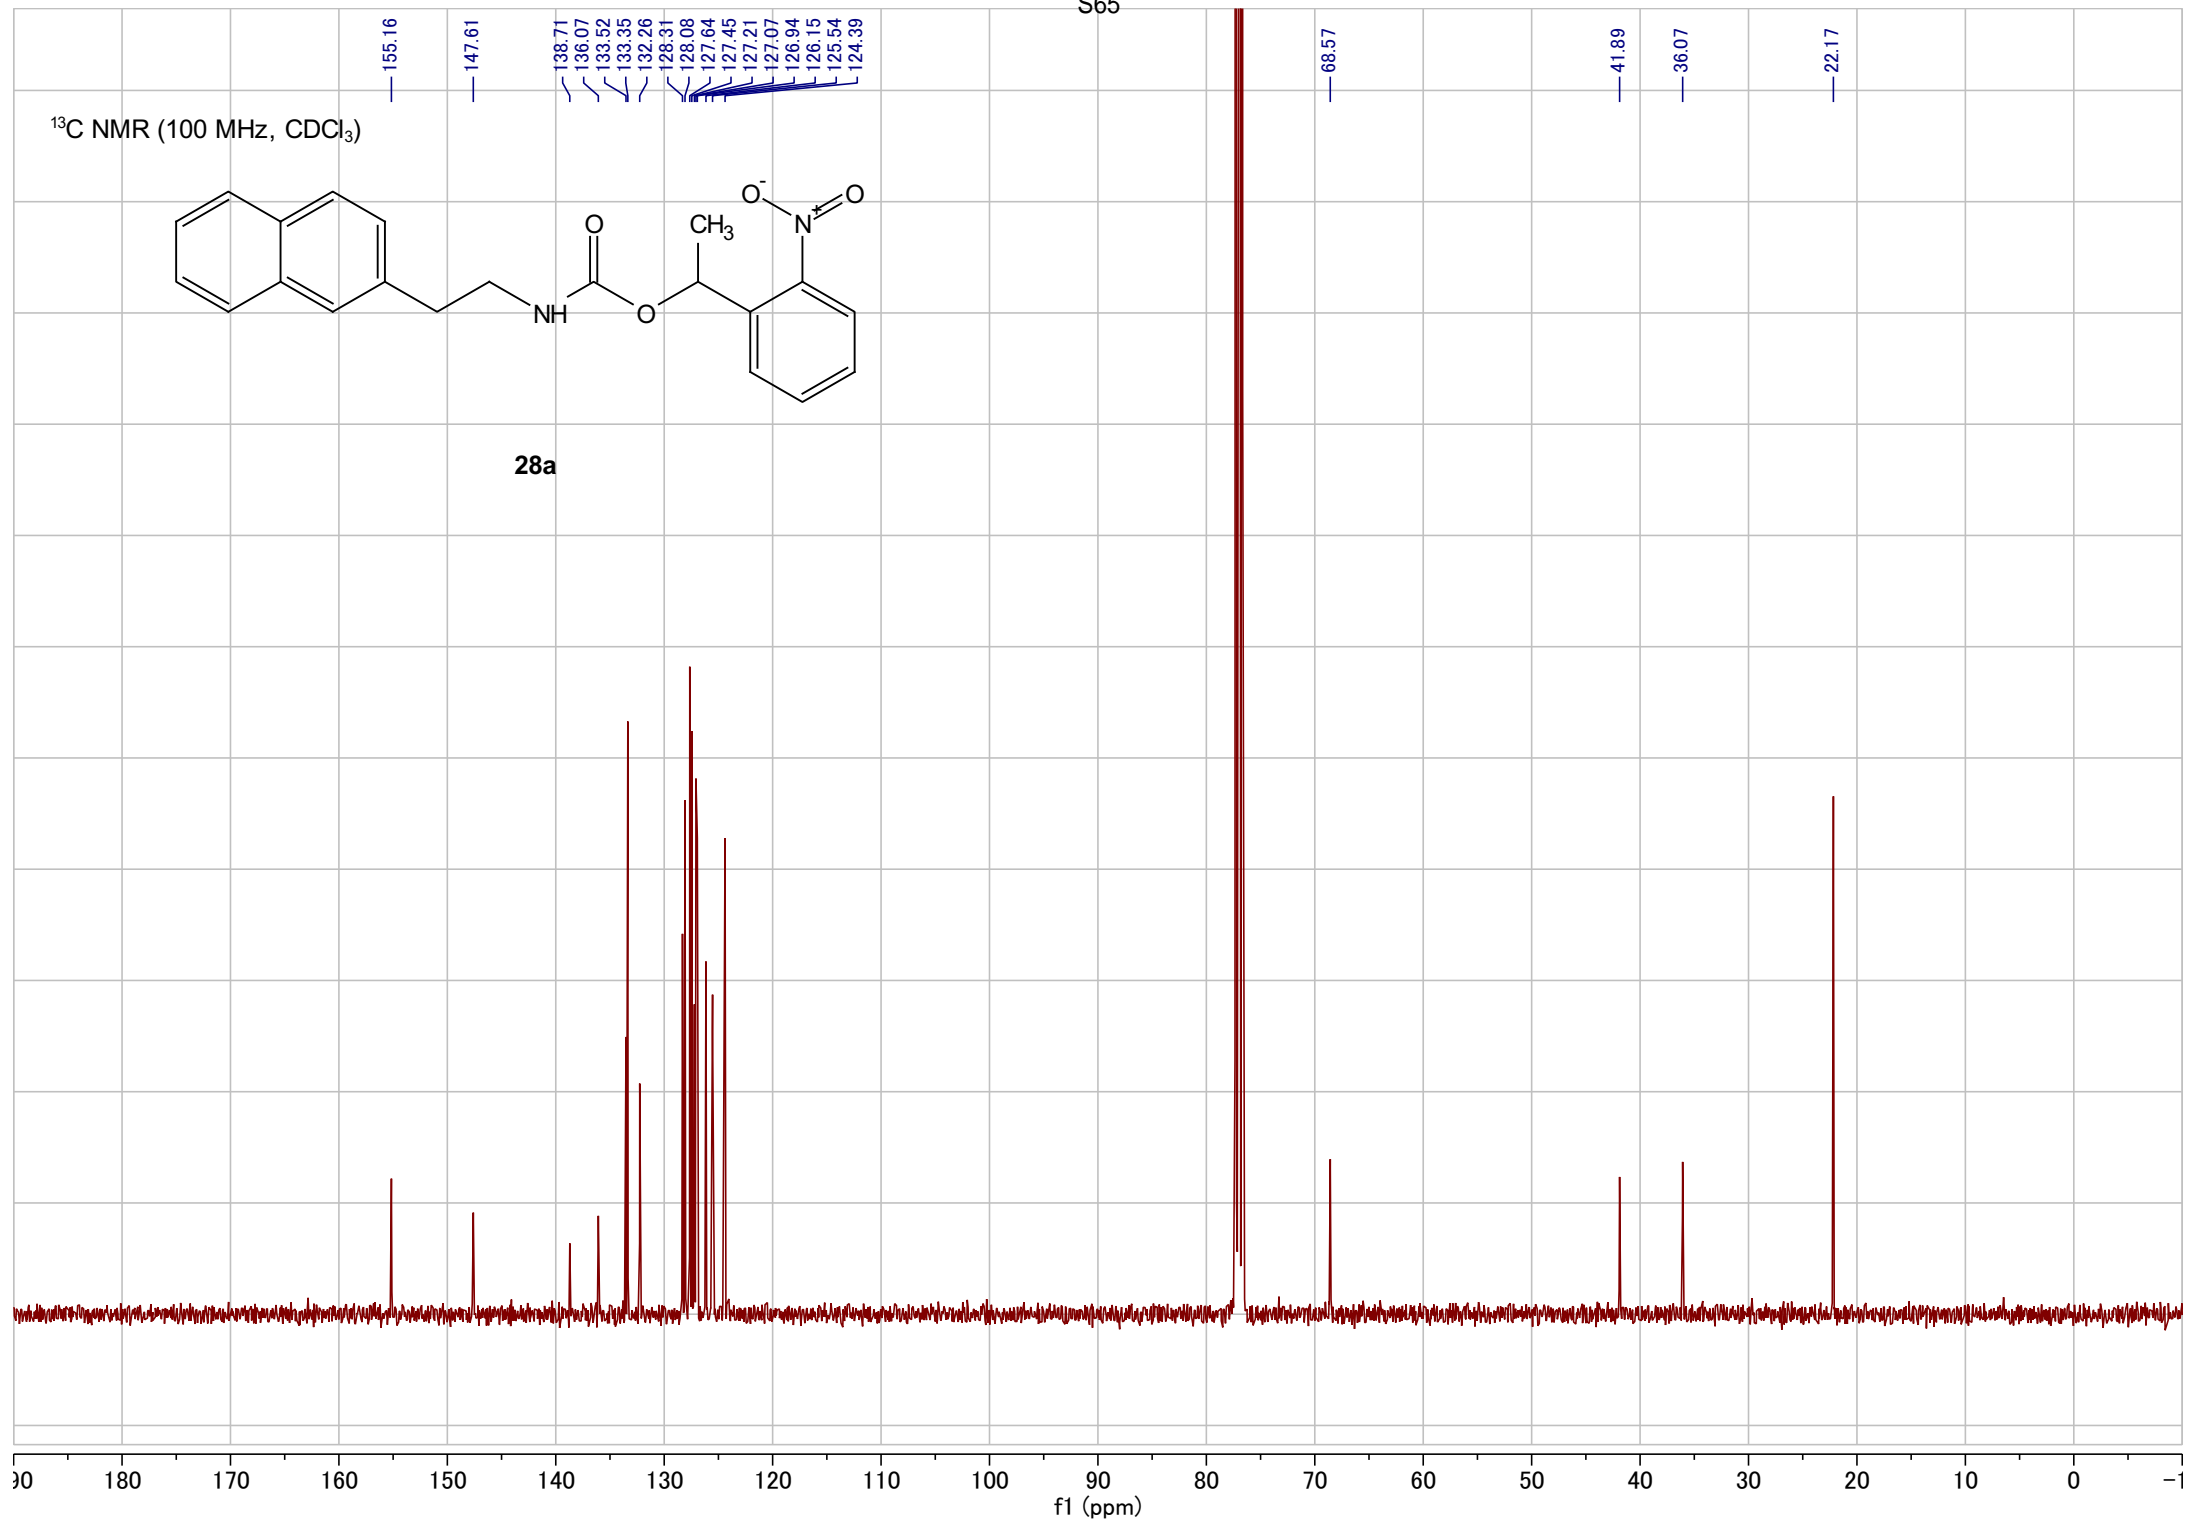

<sup>1</sup>H NMR (400 MHz, CDCl<sub>3</sub>)

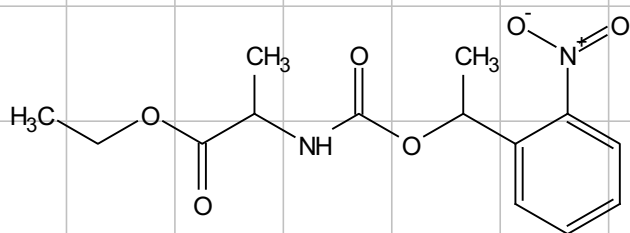

29a

7.92  
7.90  
7.89  
7.62  
7.60  
7.41  
7.39  
7.38  
7.37

6.26  
6.25  
6.23  
6.21

5.32

4.27  
4.25  
4.25  
4.24  
4.23  
4.21  
4.19  
4.17  
4.15  
4.13

3.15

1.61  
1.60  
1.39  
1.37  
1.33  
1.32  
1.27  
1.25  
1.23  
1.21  
1.20

0 8.5 8.0 7.5 7.0 6.5 6.0 5.5 5.0 4.5 4.0 3.5 3.0 2.5 2.0 1.5 1.0 0.5 0.0 -0.5 -1

f1 (ppm)

S67

 $^{13}\text{C}$  NMR (100 MHz,  $\text{CDCl}_3$ )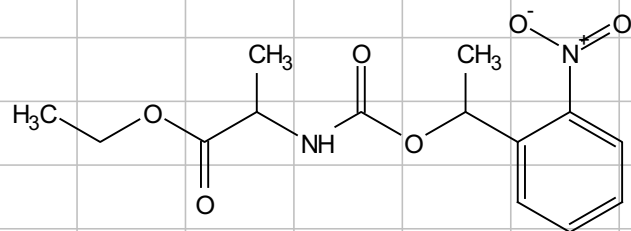

29a

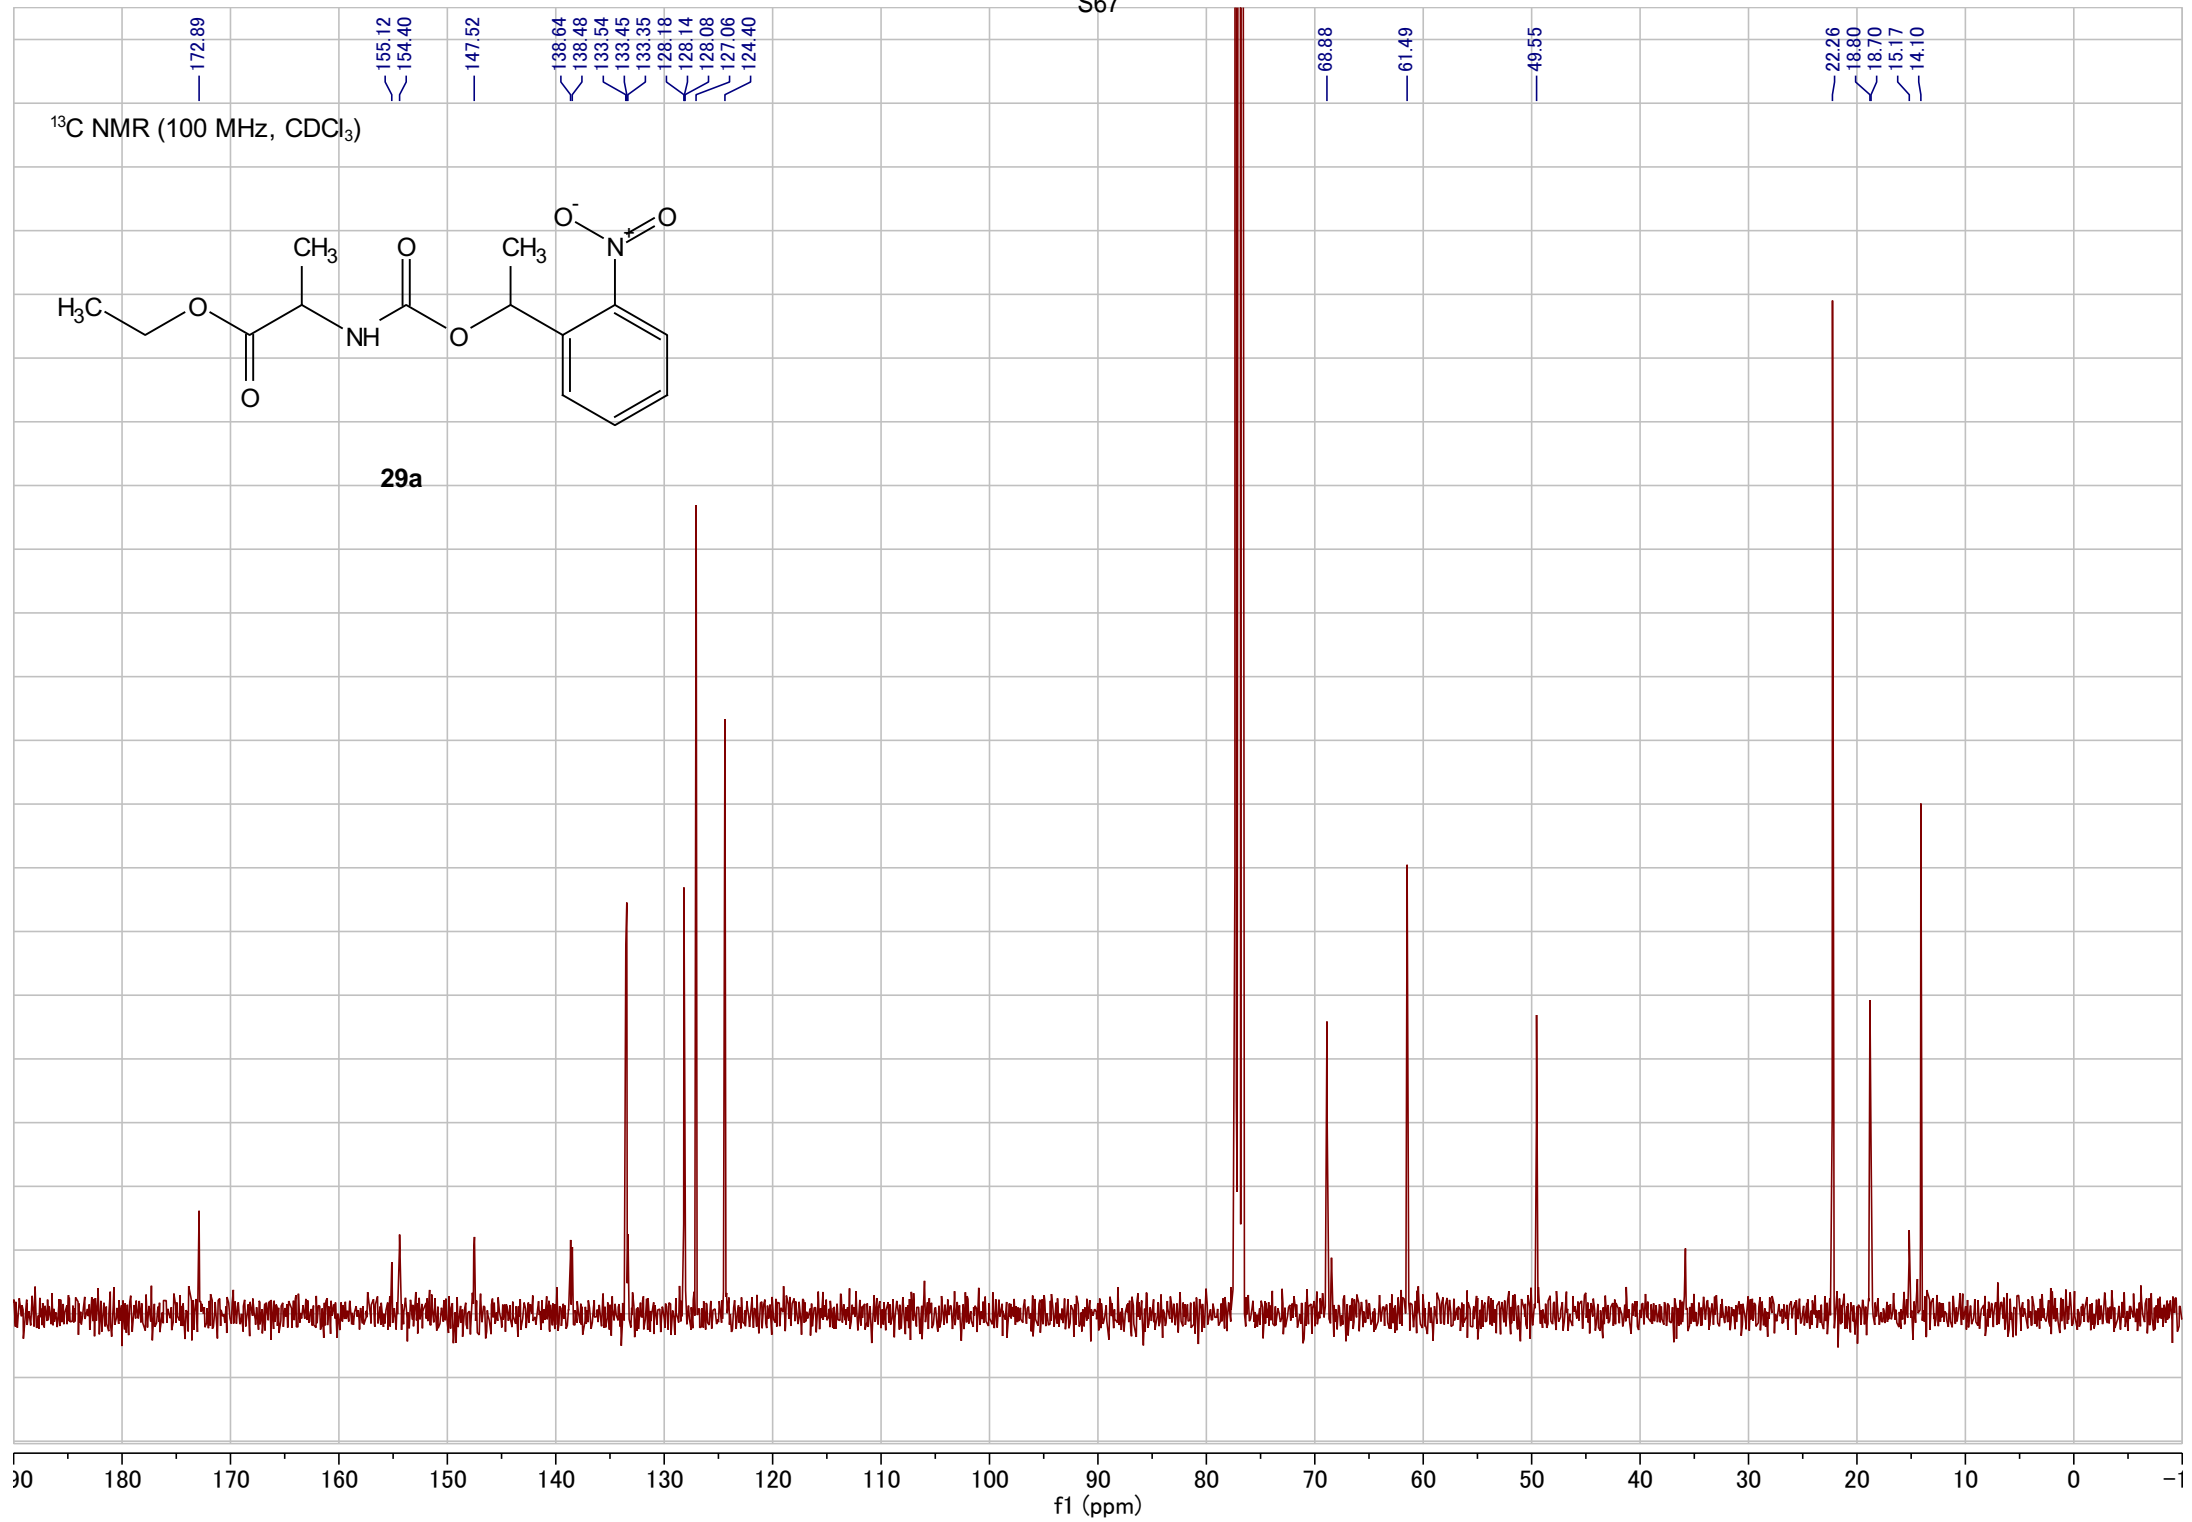

S68

<sup>1</sup>H NMR (400 MHz, CDCl<sub>3</sub>)

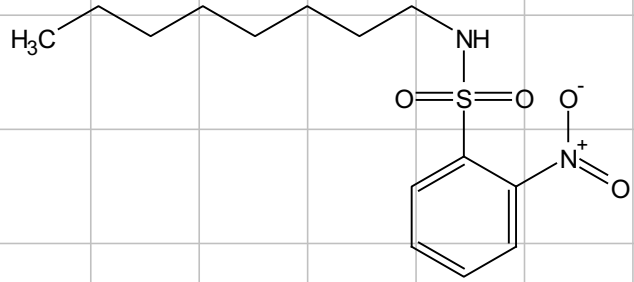

27b

8.13  
8.12  
8.11  
7.85  
7.83  
7.82  
7.74  
7.73  
7.72  
7.70  
7.69

5.22

3.09  
3.08  
3.06  
3.04

1.53  
1.51  
1.49  
1.47  
1.45  
1.25  
1.23

0.86  
0.84  
0.82

0 8.5 8.0 7.5 7.0 6.5 6.0 5.5 5.0 4.5 4.0 3.5 3.0 2.5 2.0 1.5 1.0 0.5 0.0 -0.5 -1

f1 (ppm)

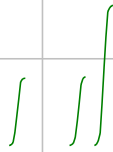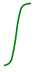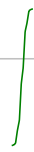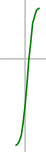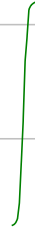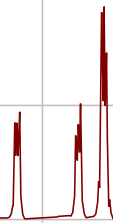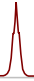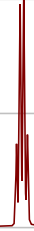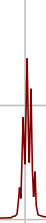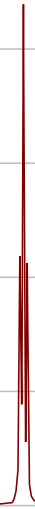

S69

<sup>13</sup>C NMR (100 MHz, CDCl<sub>3</sub>)

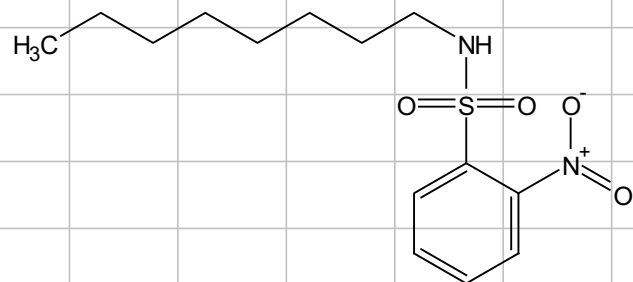

27b

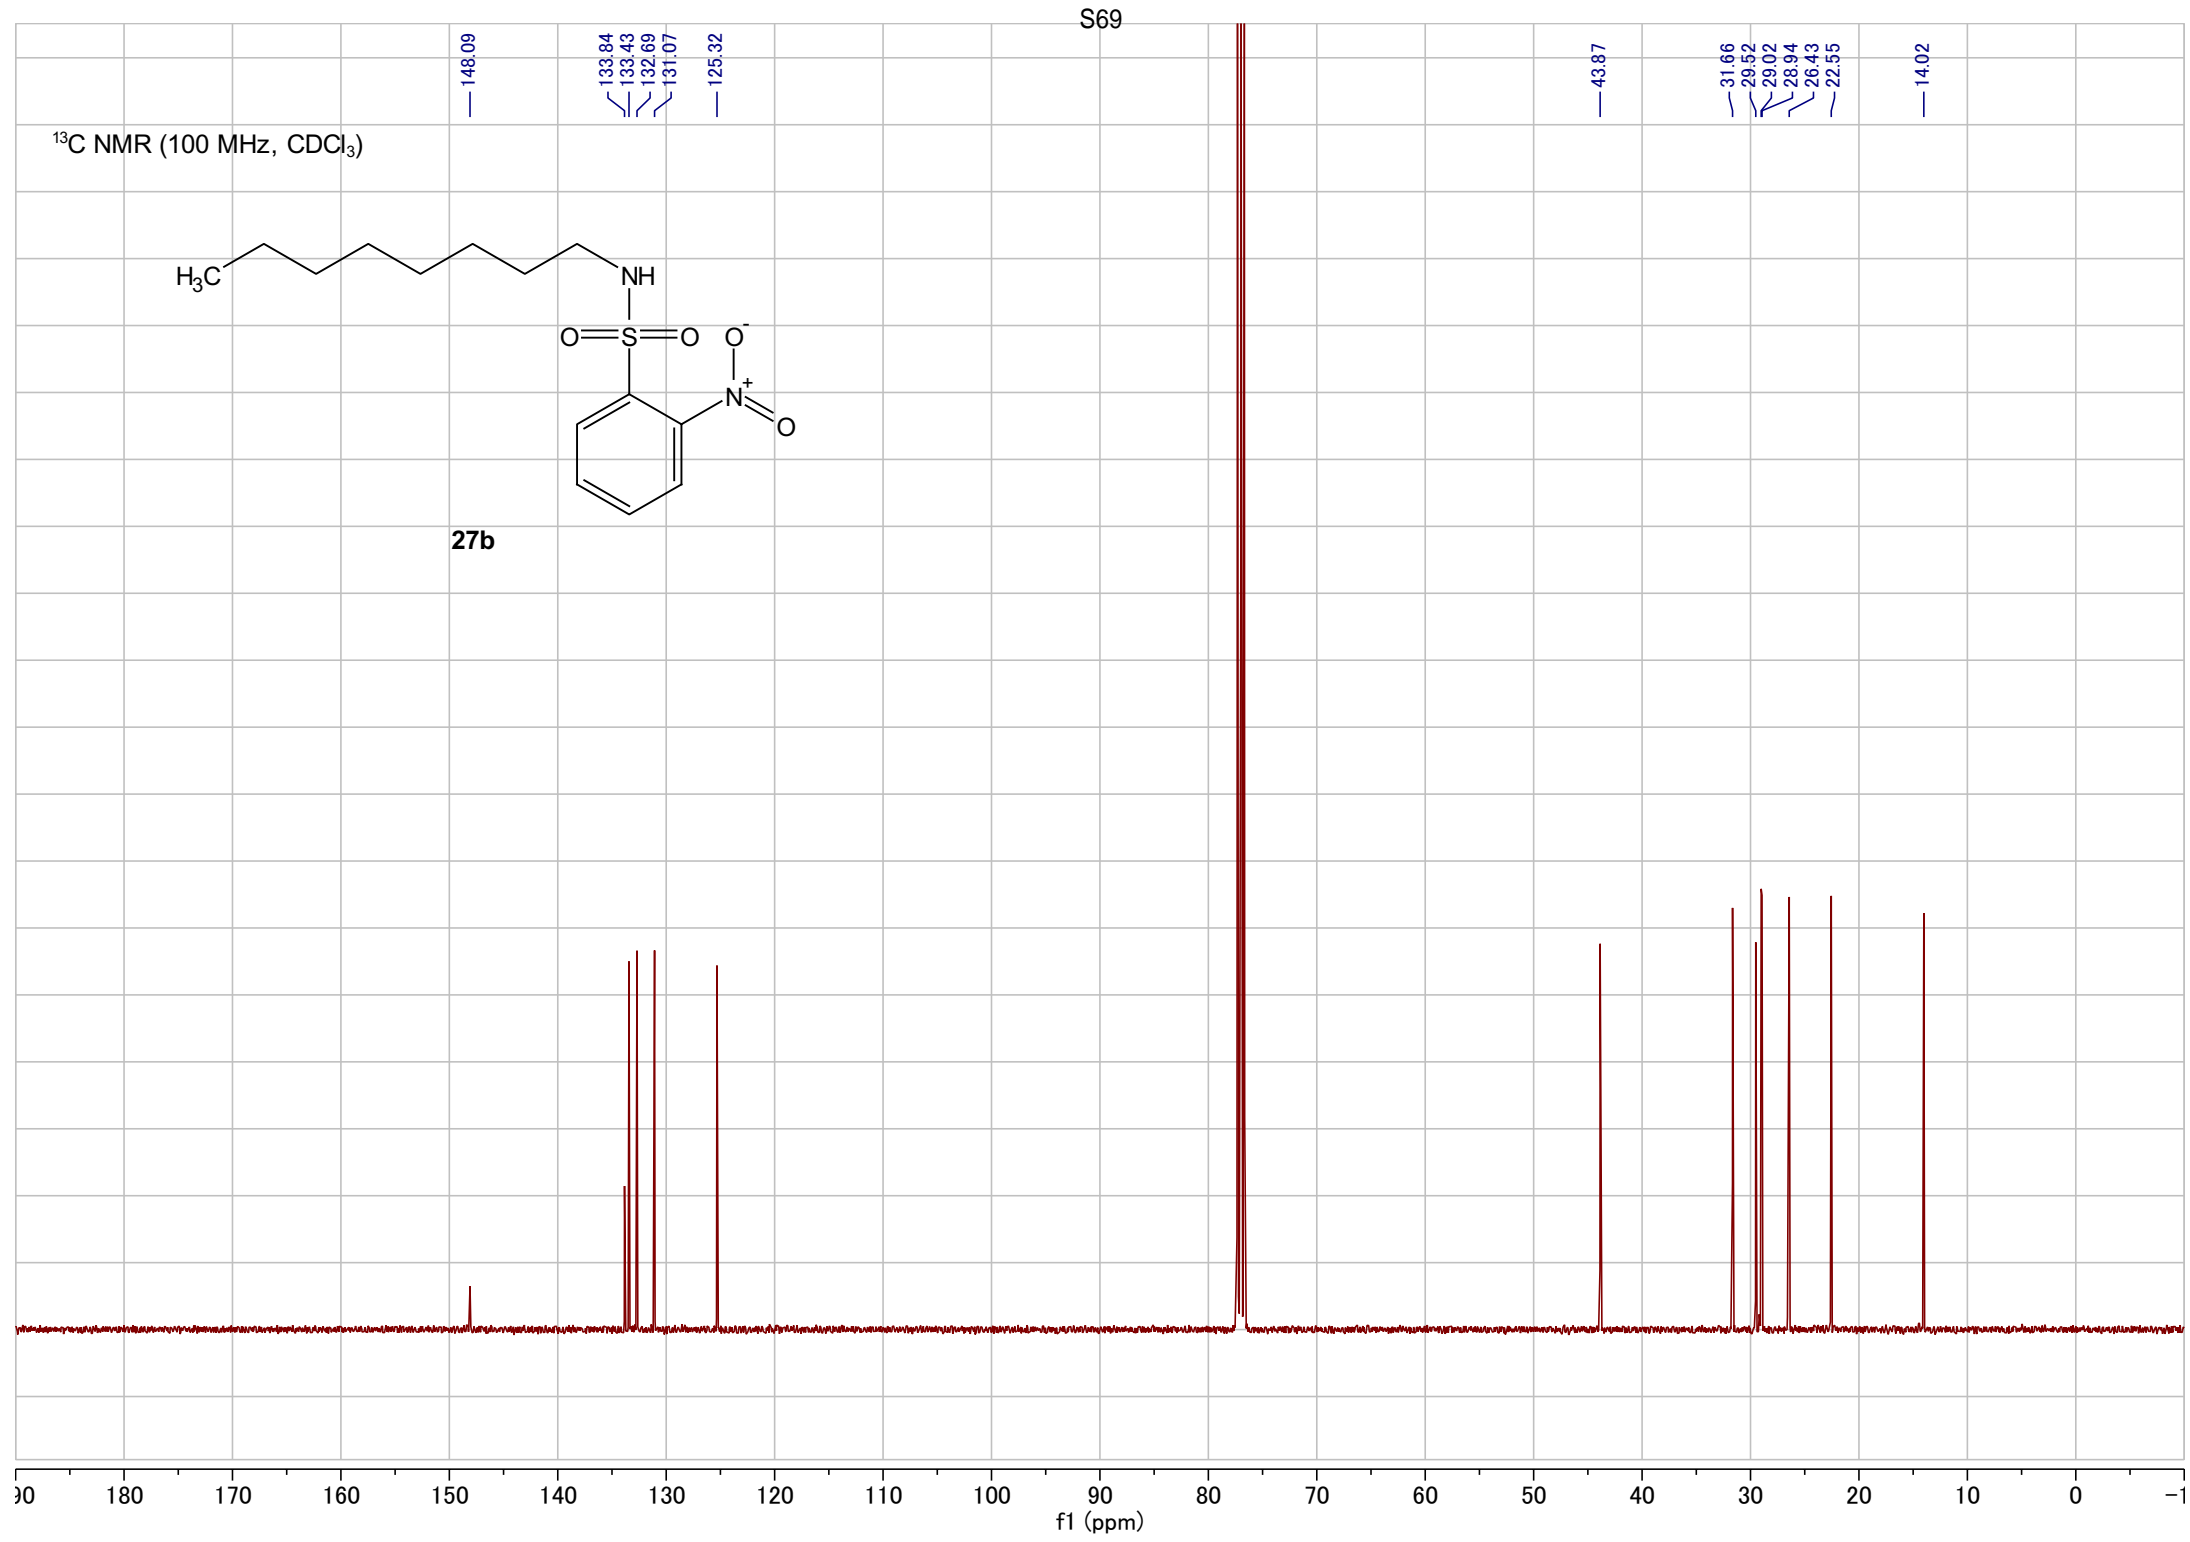



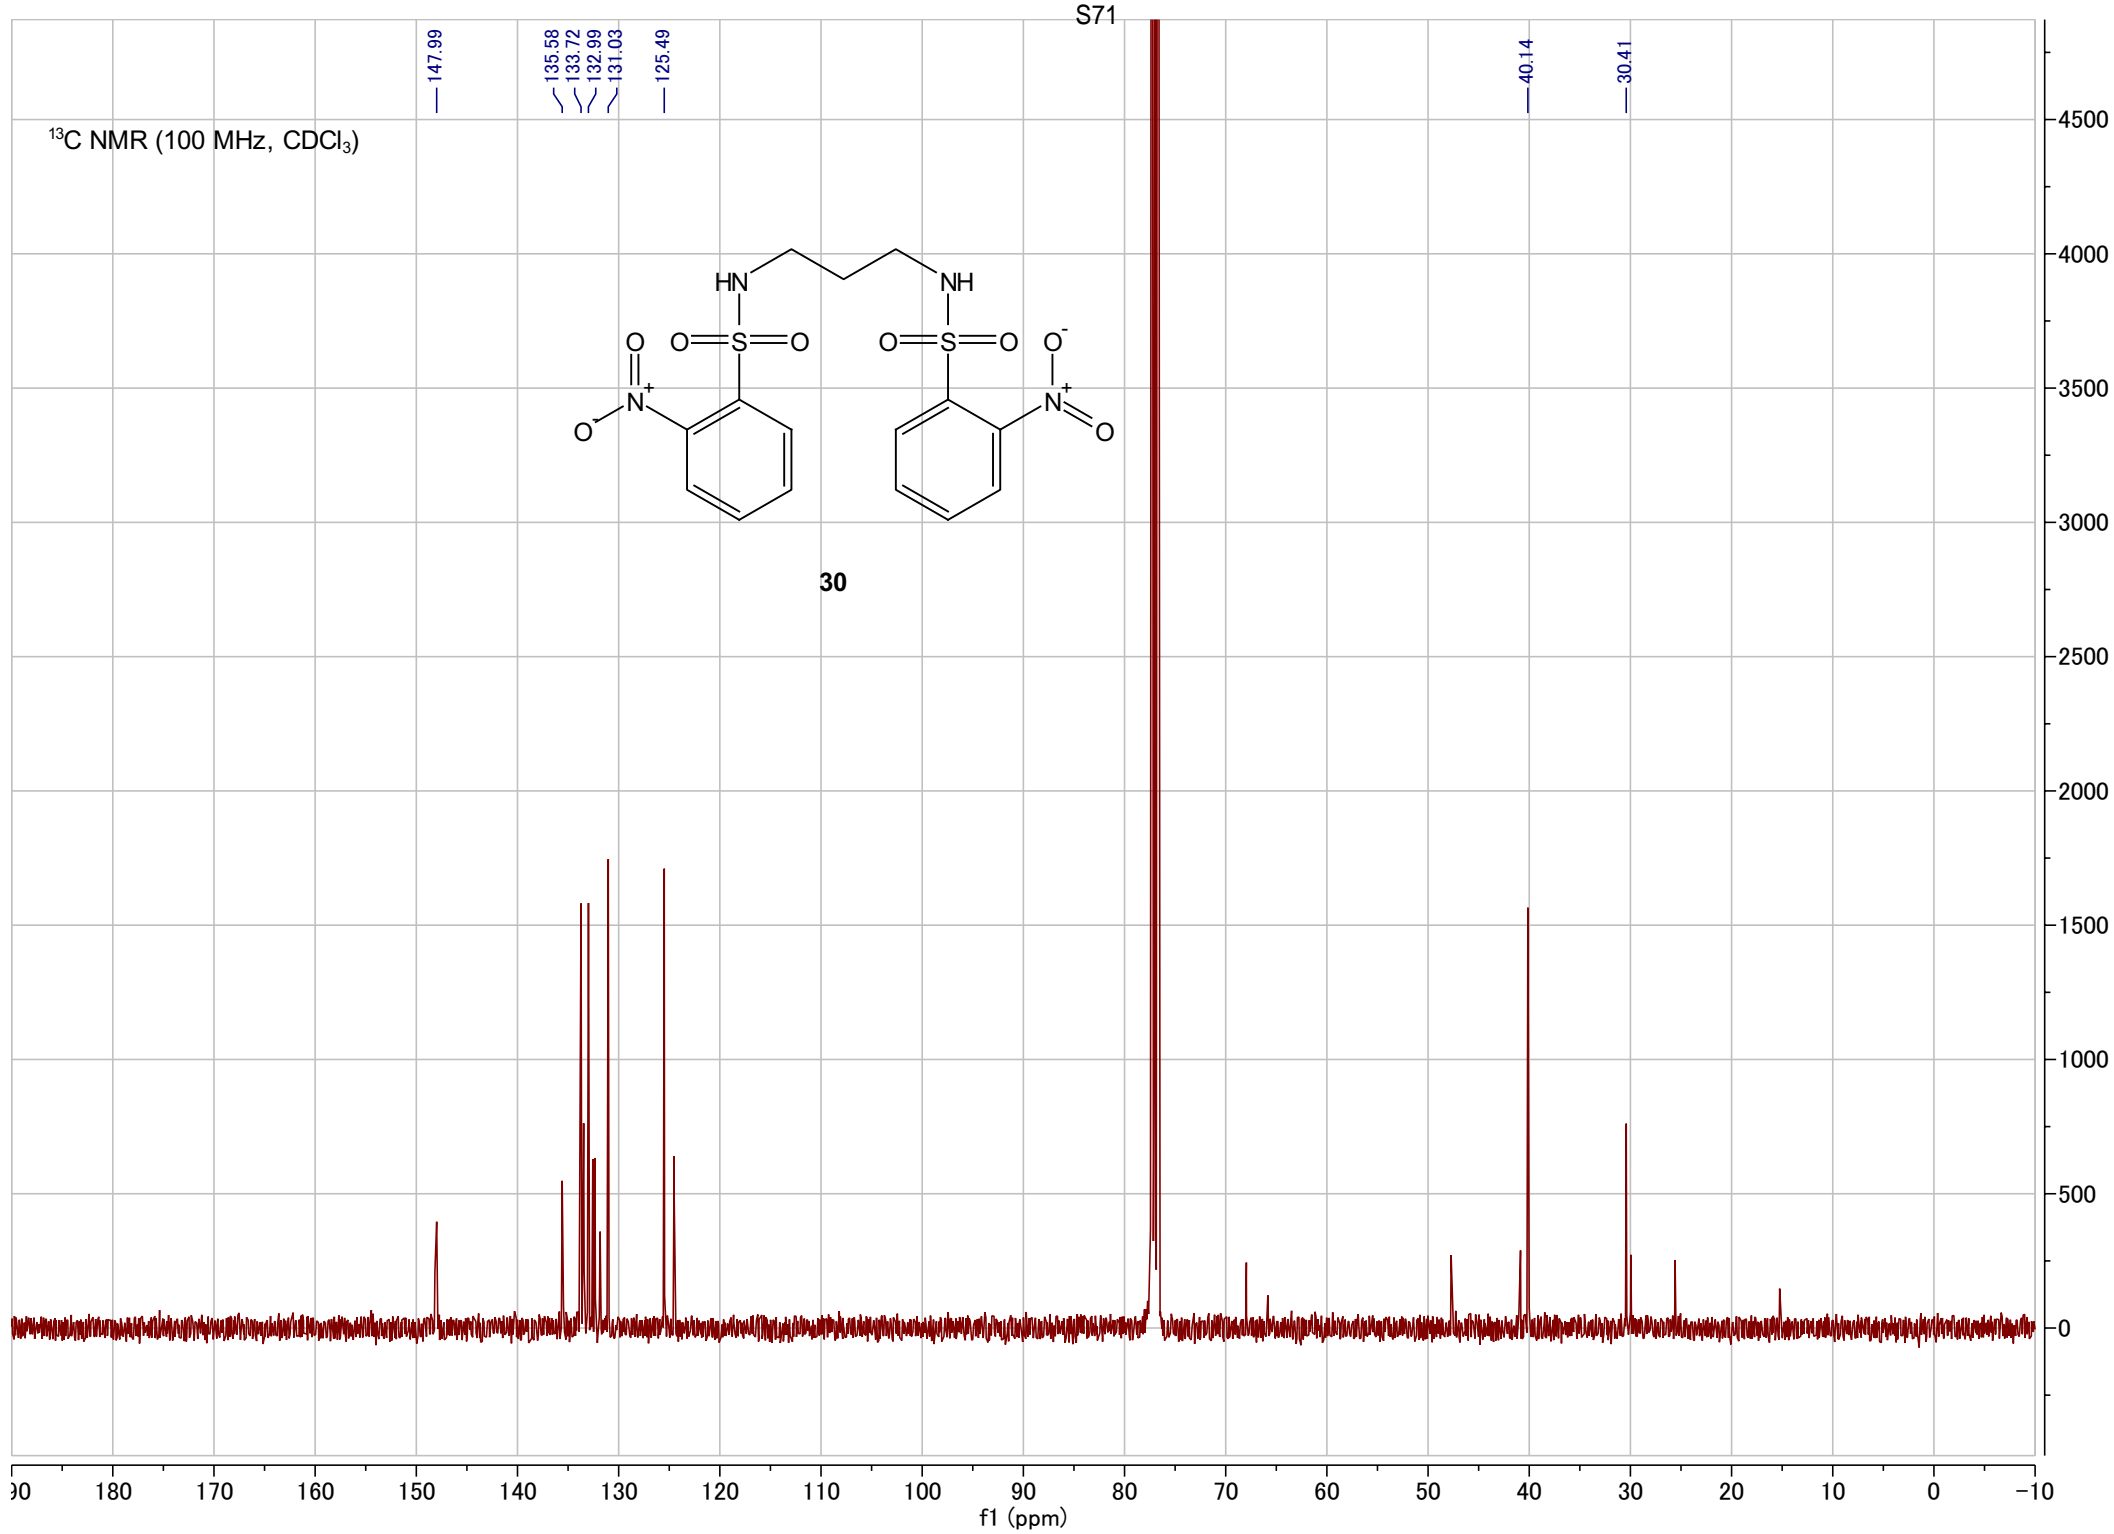

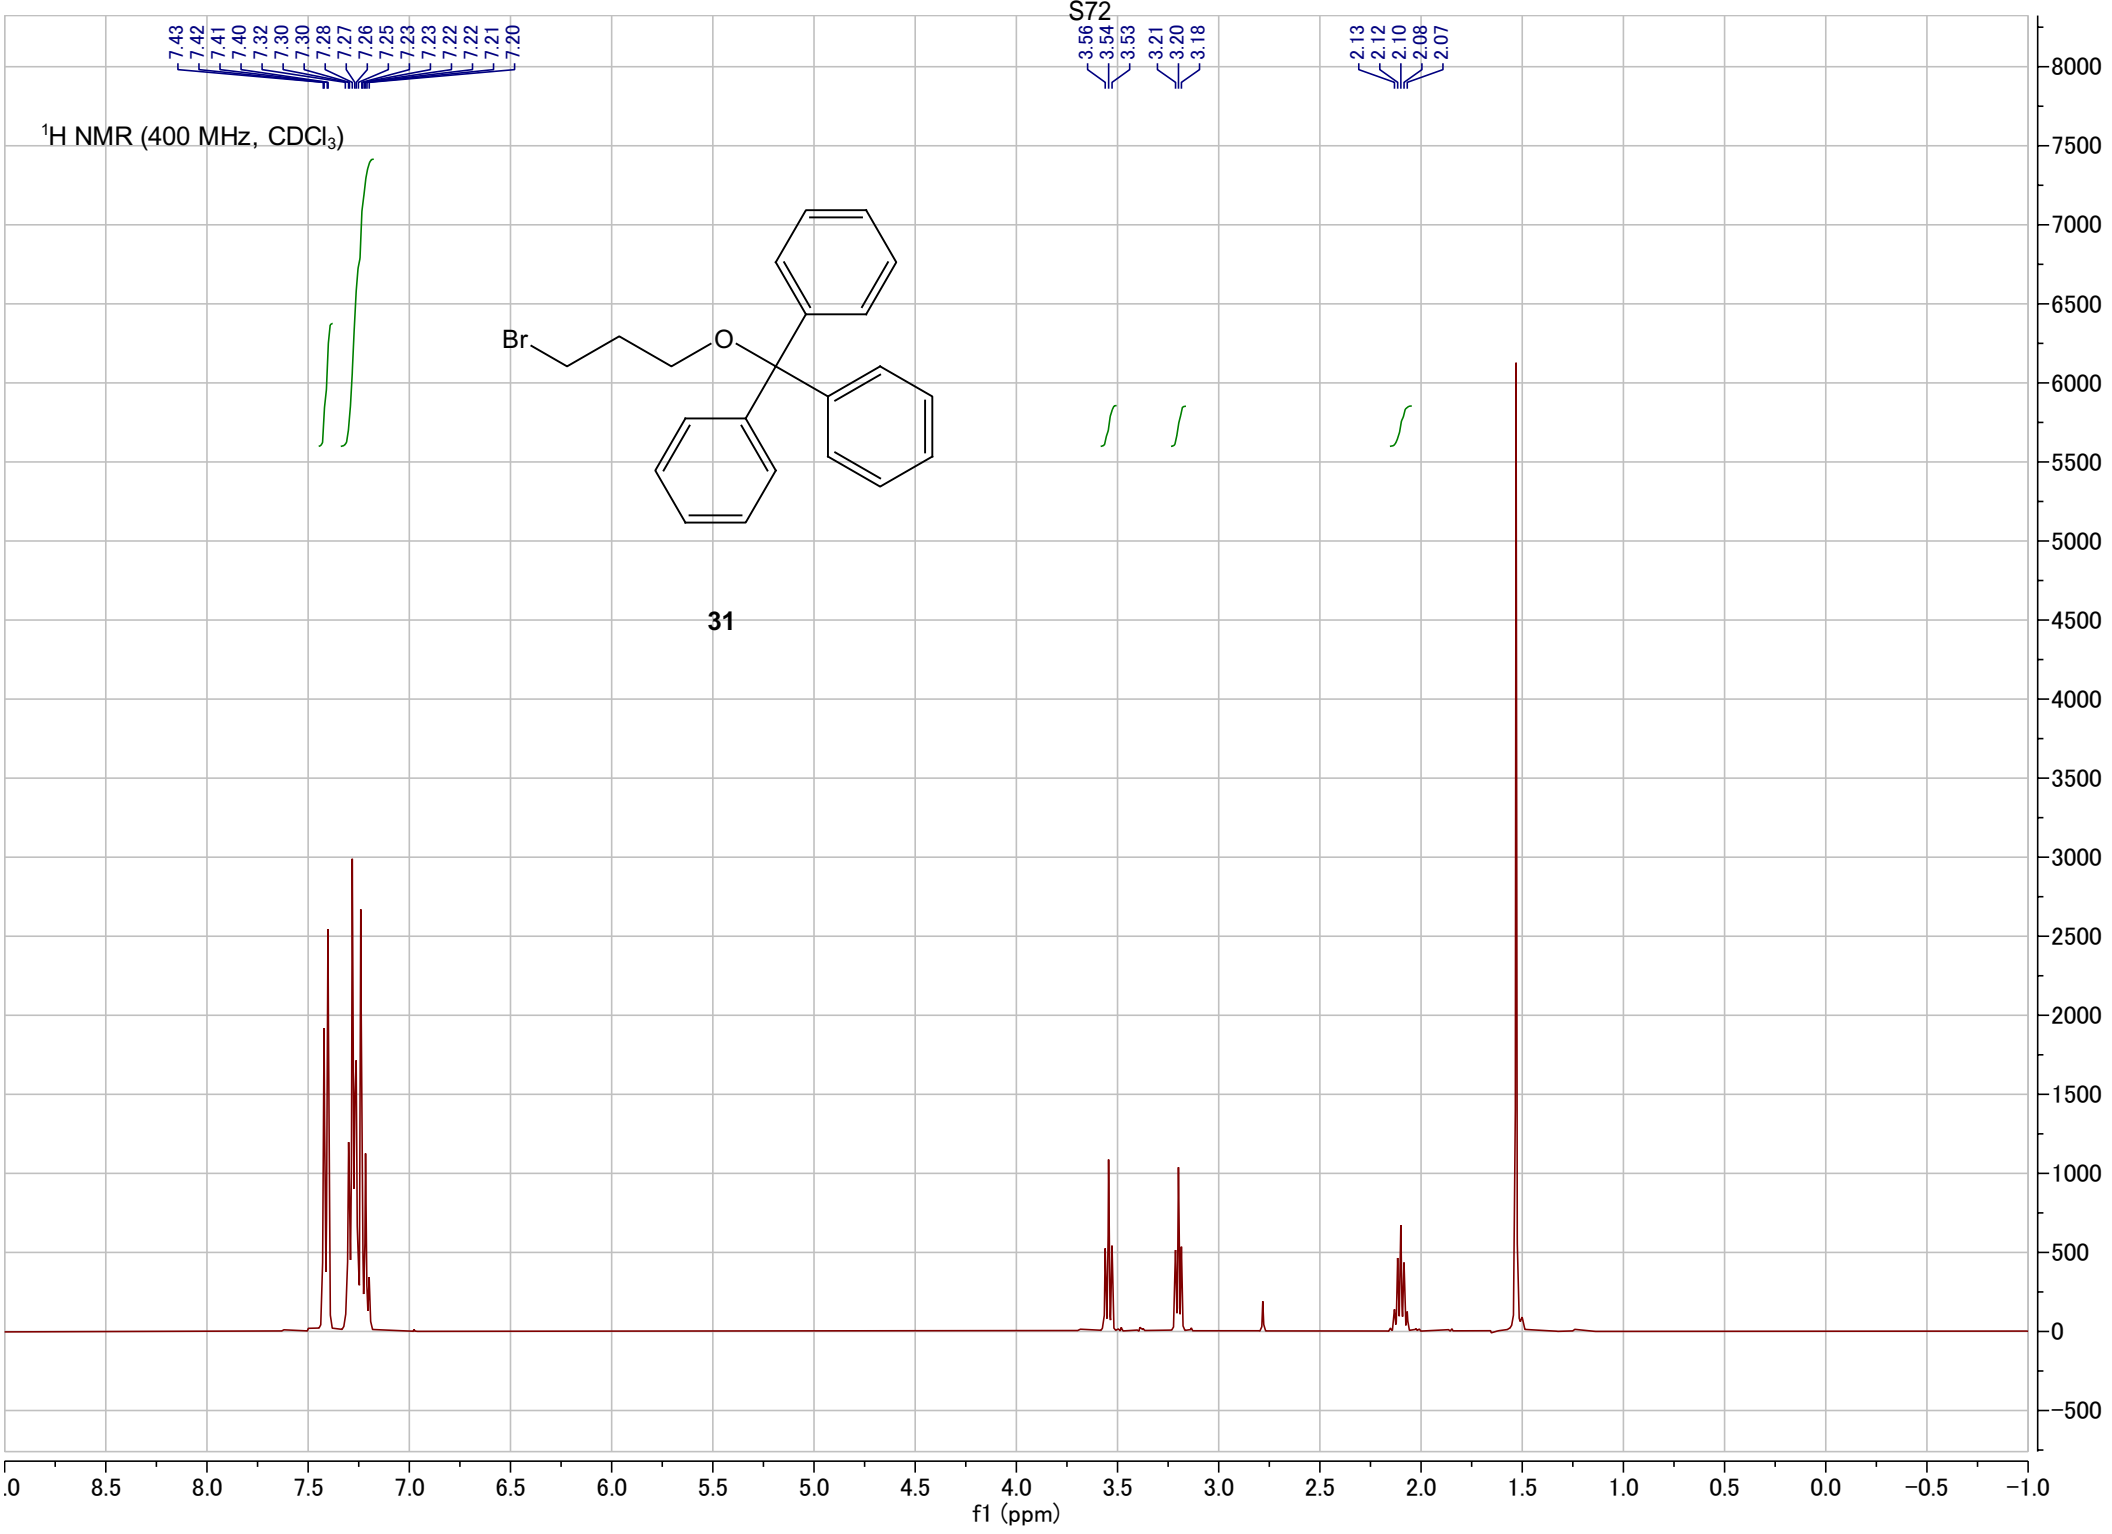







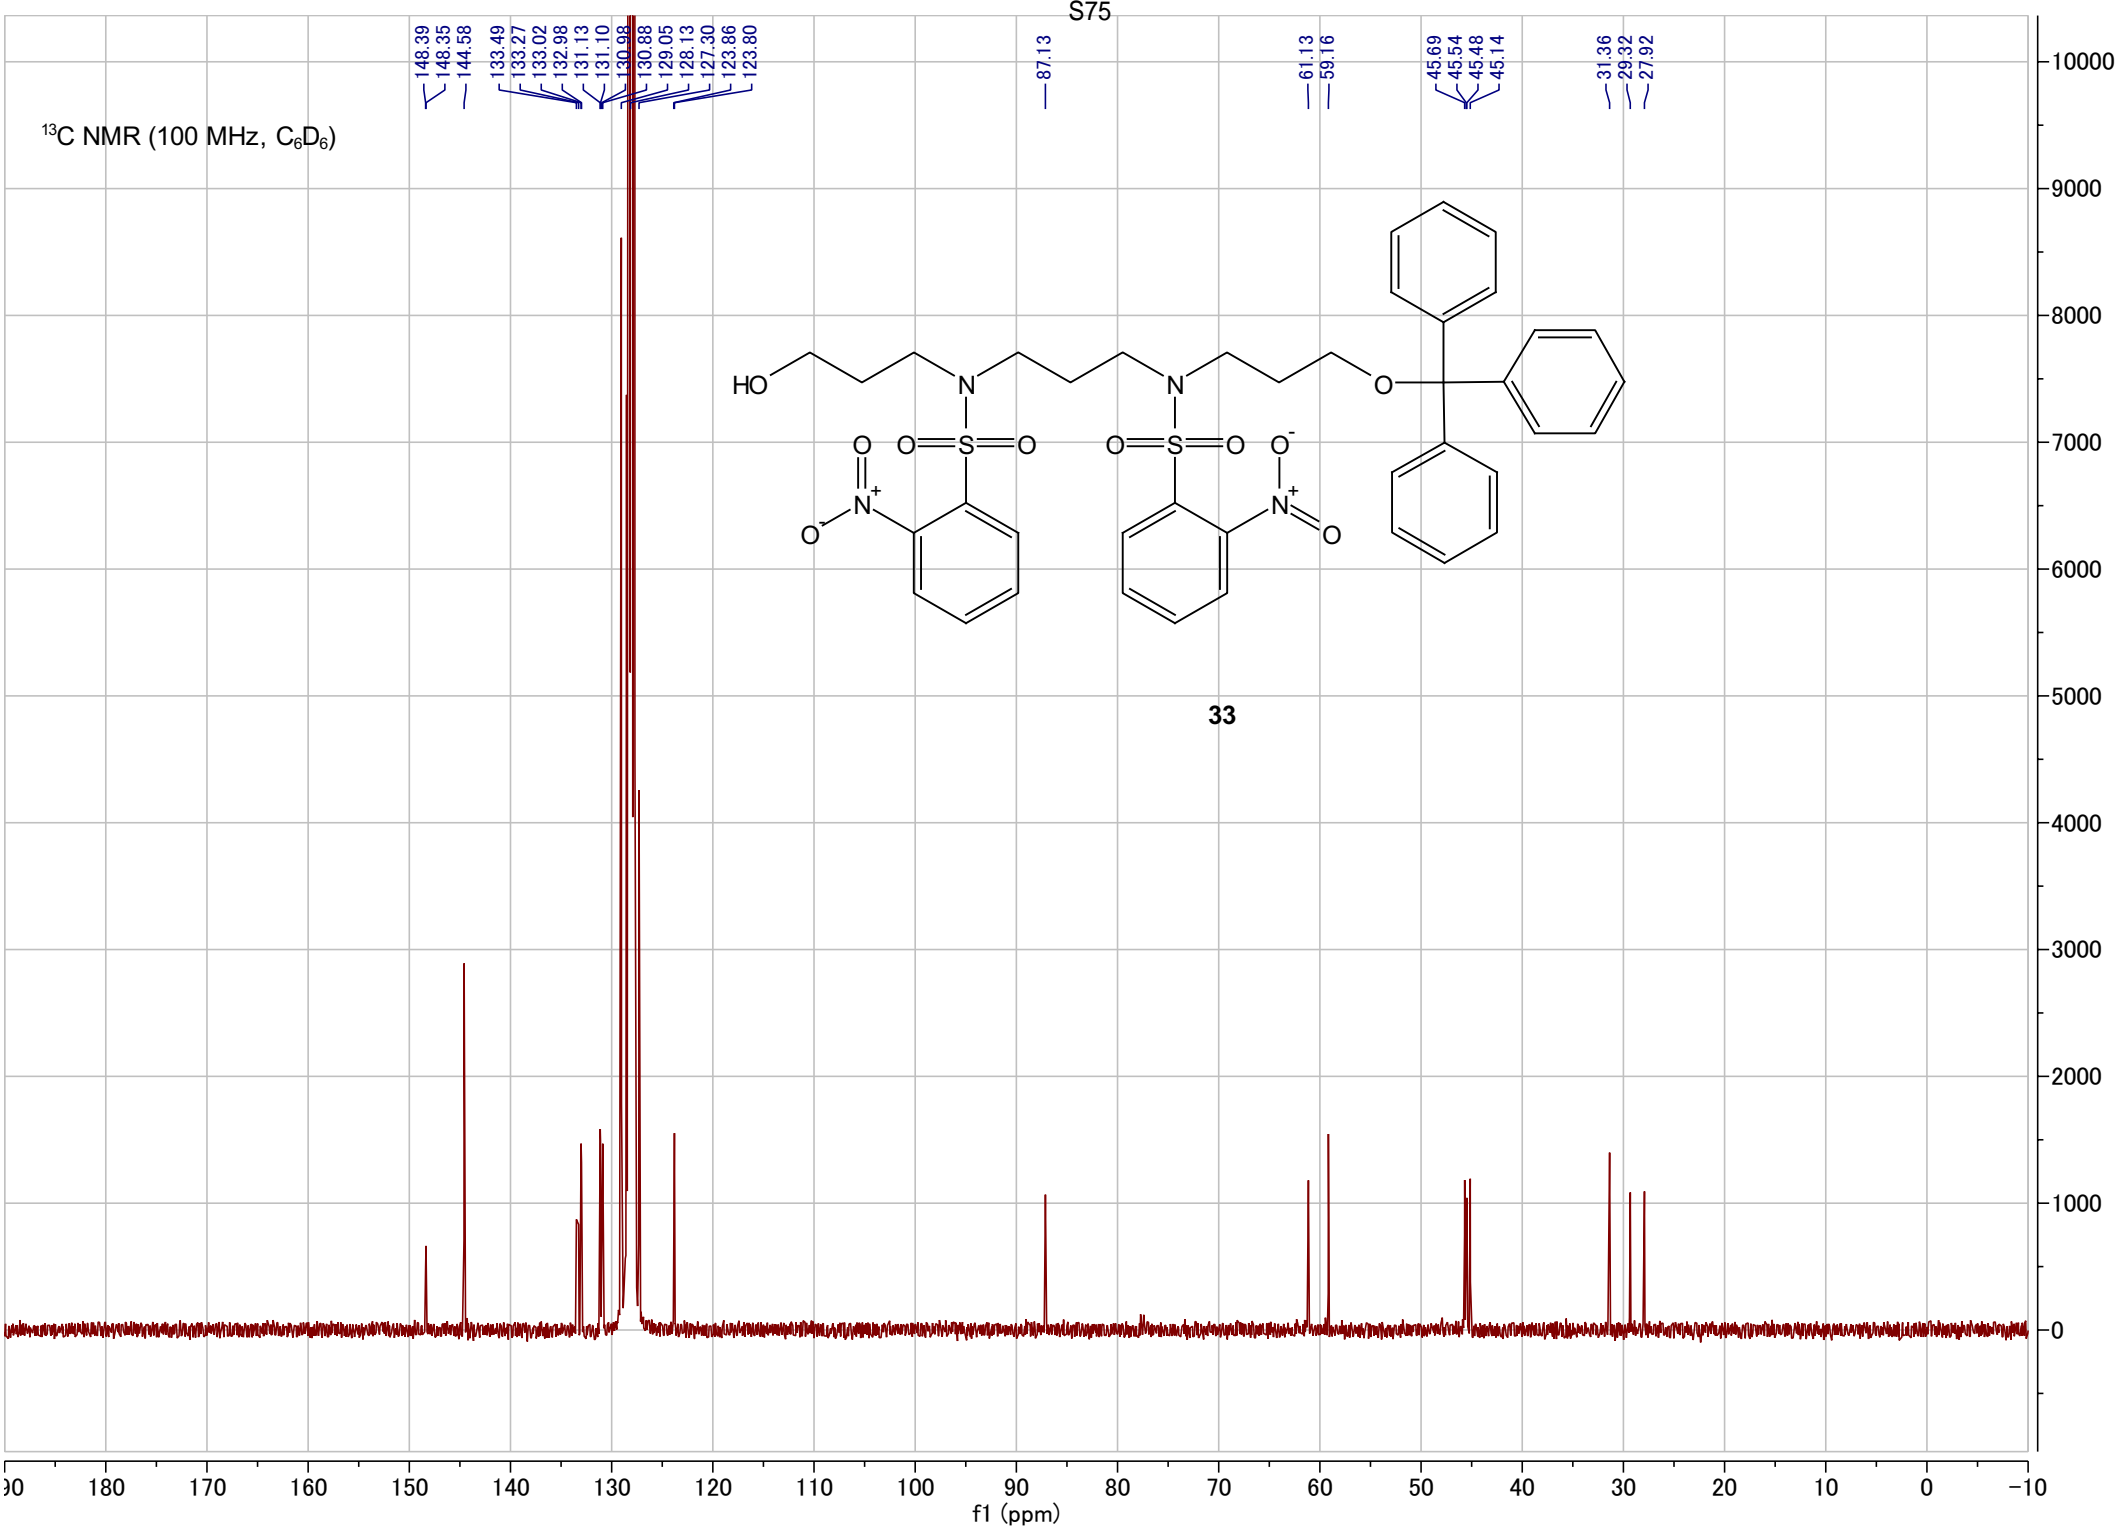

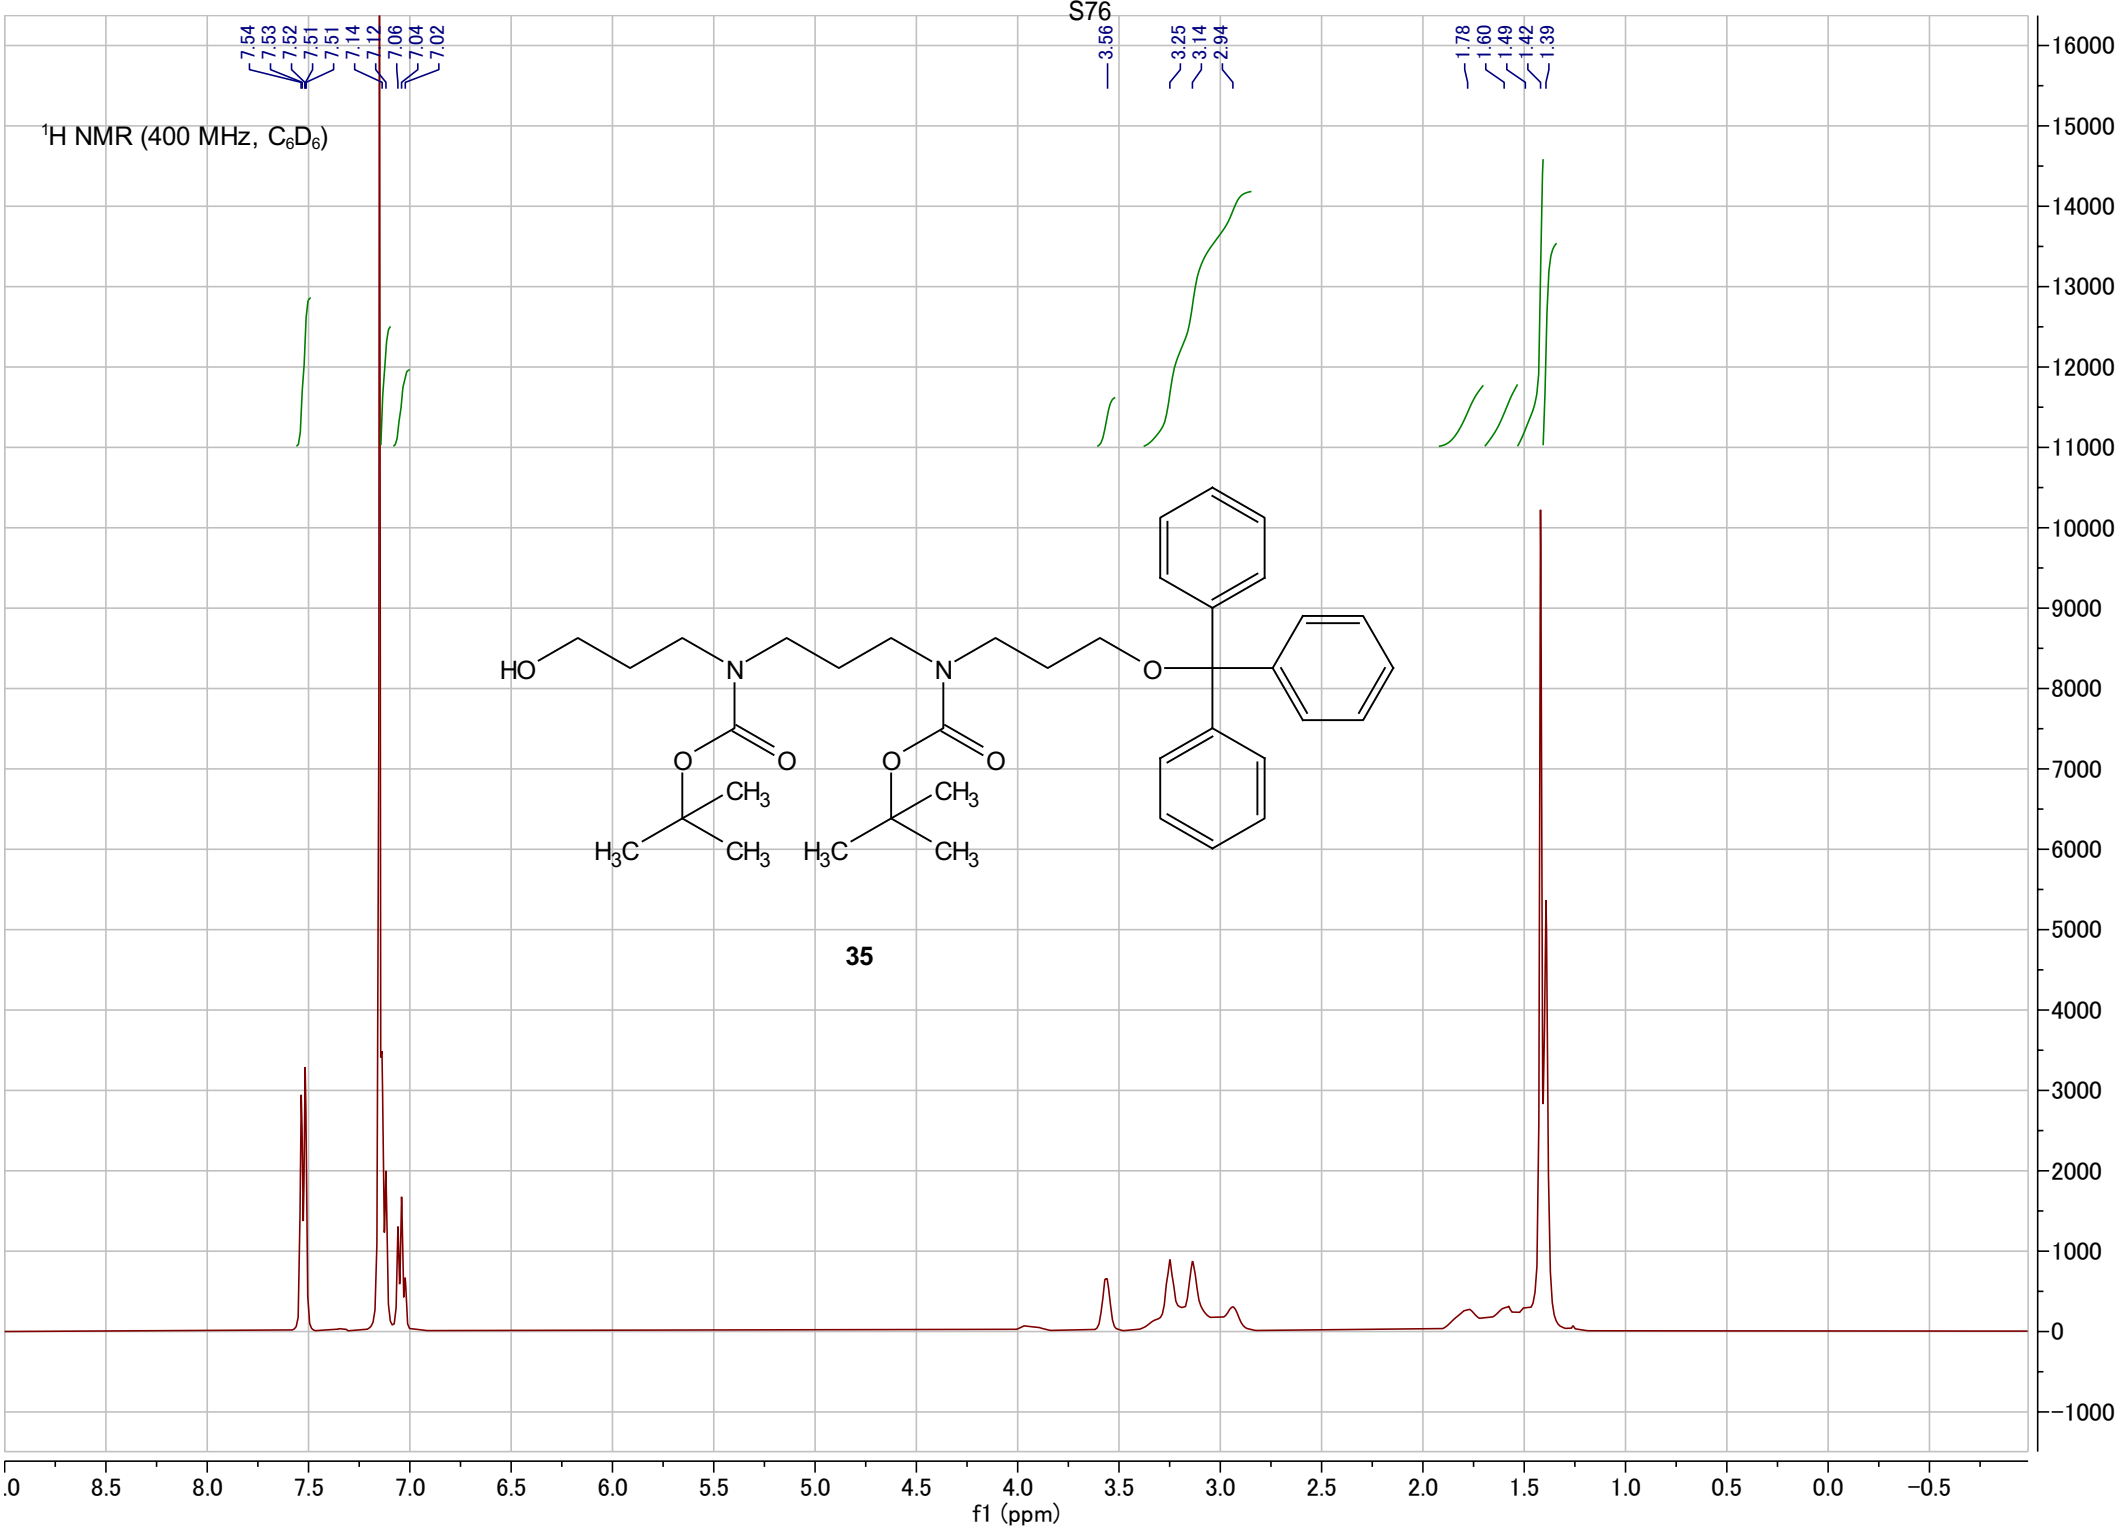

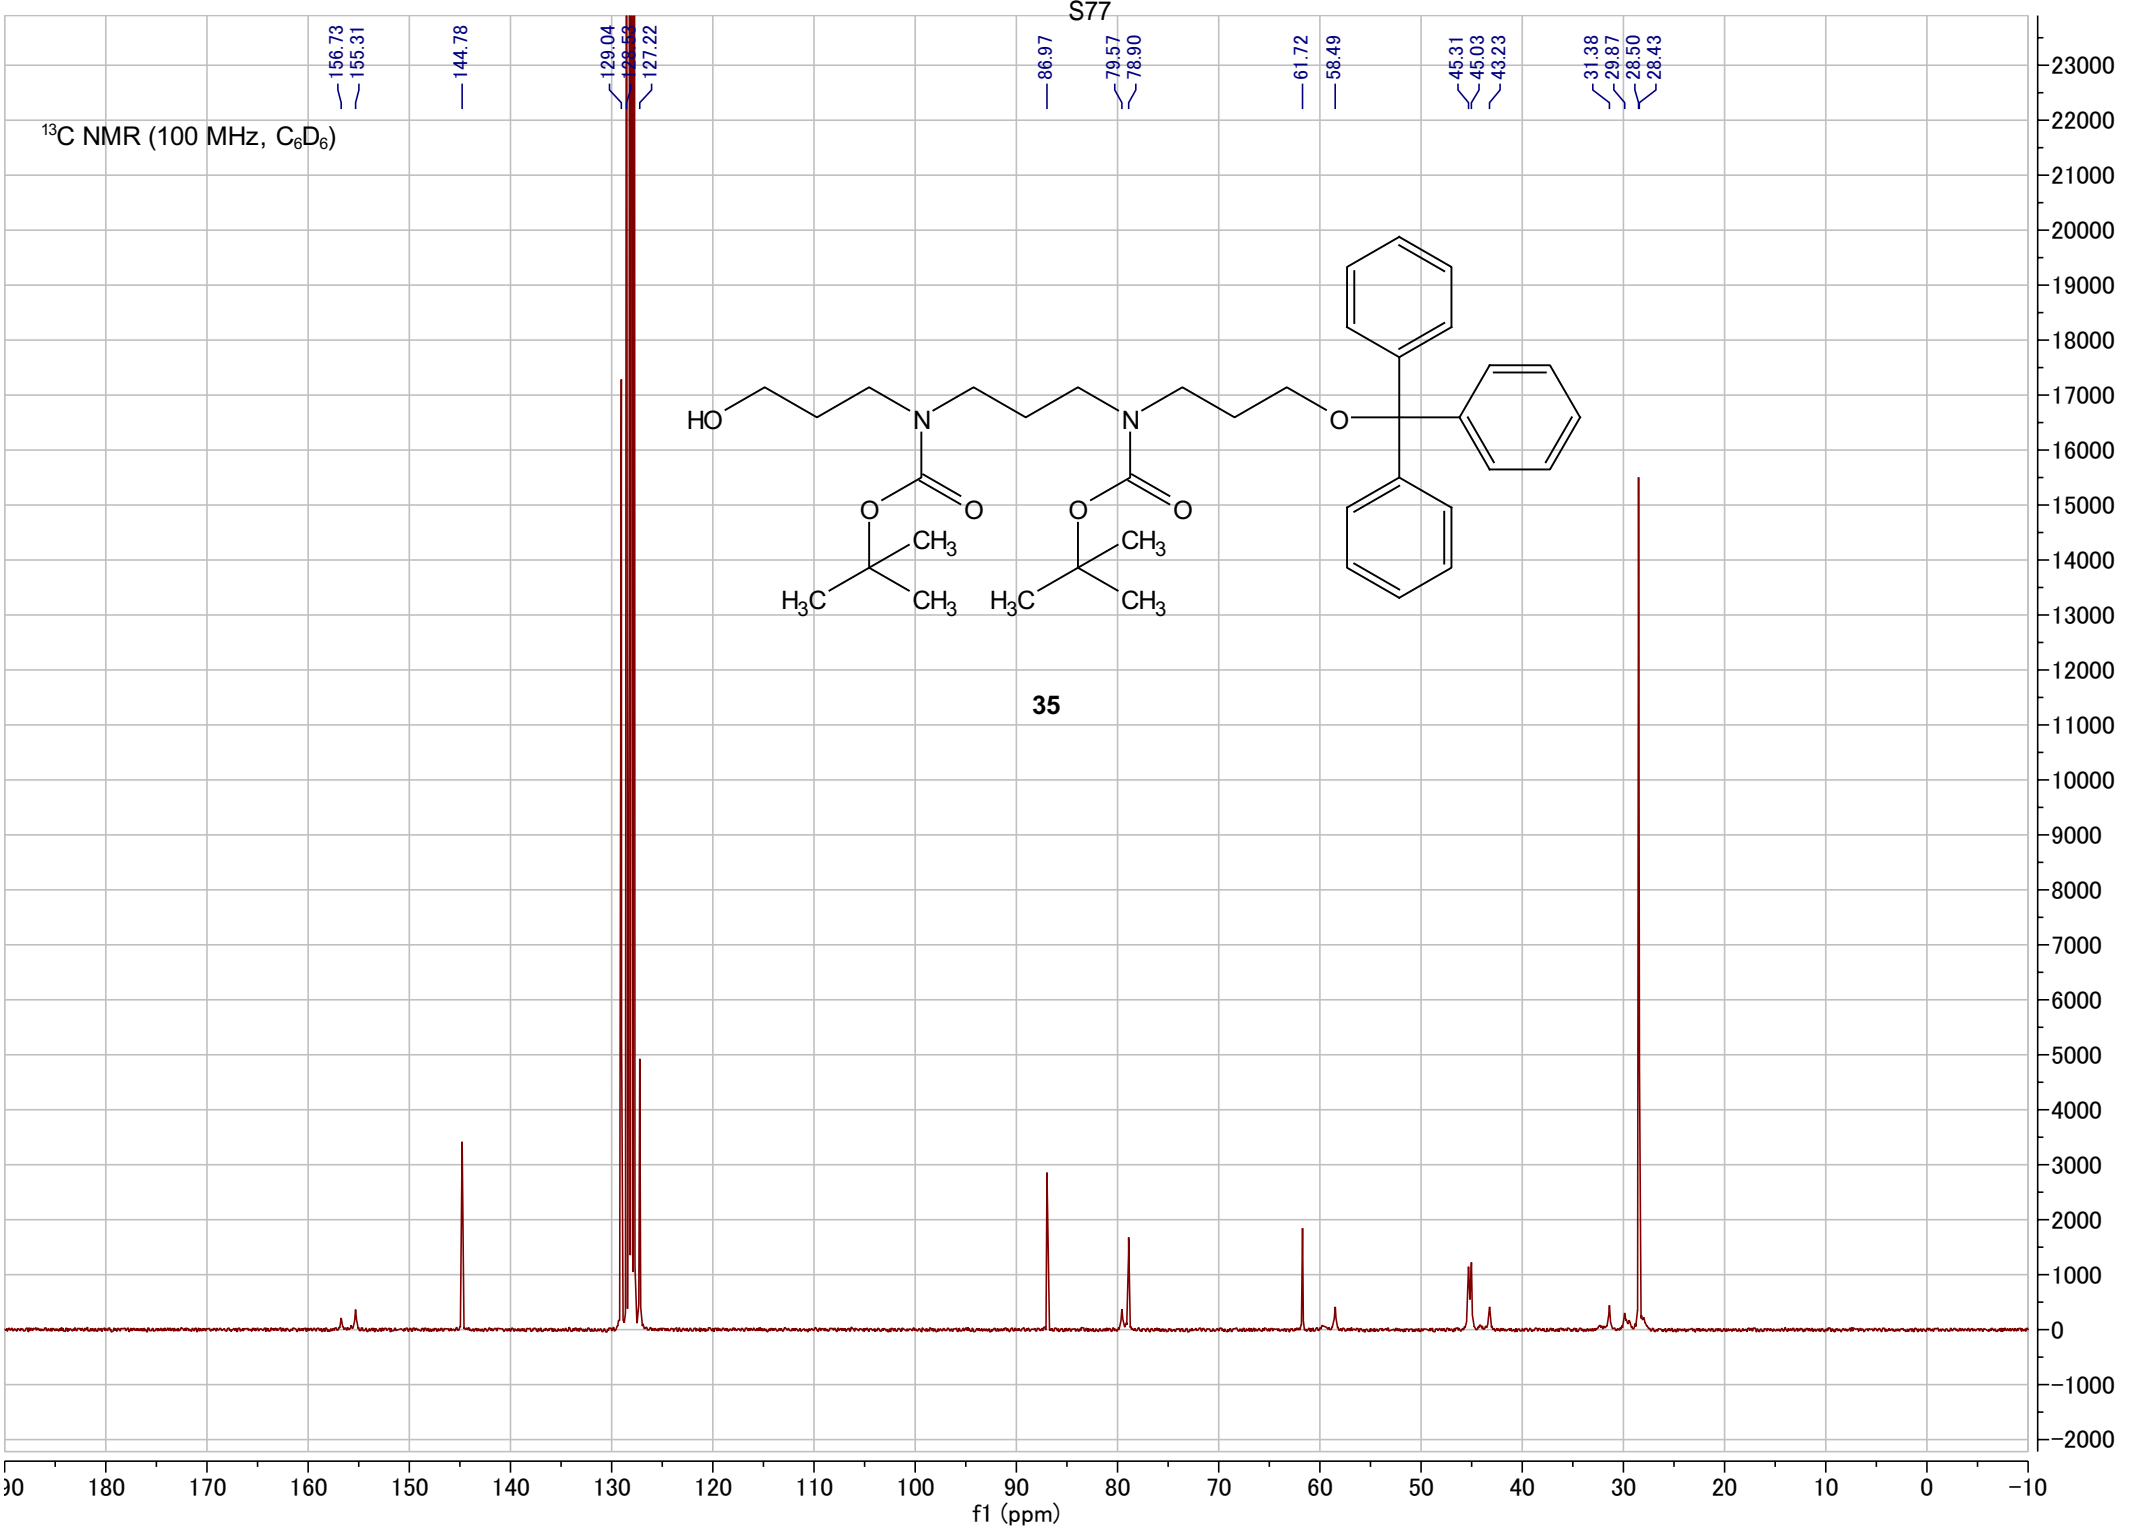

<sup>1</sup>H NMR (400 MHz, CDCl<sub>3</sub>)

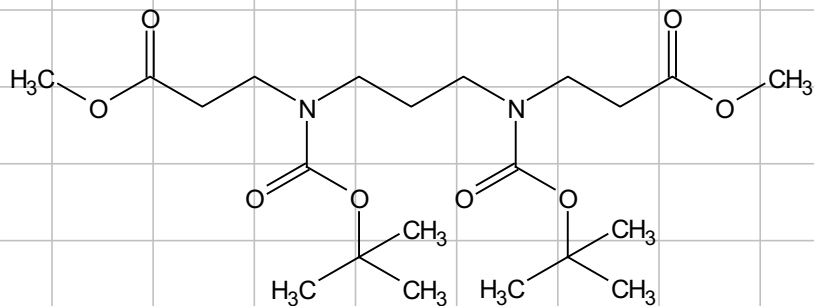

**38**

S78

3.63  
3.43  
3.42  
3.40  
3.16  
3.15  
3.13

2.54  
2.52  
2.50

1.73  
1.71  
1.69  
1.67  
1.65

1.40

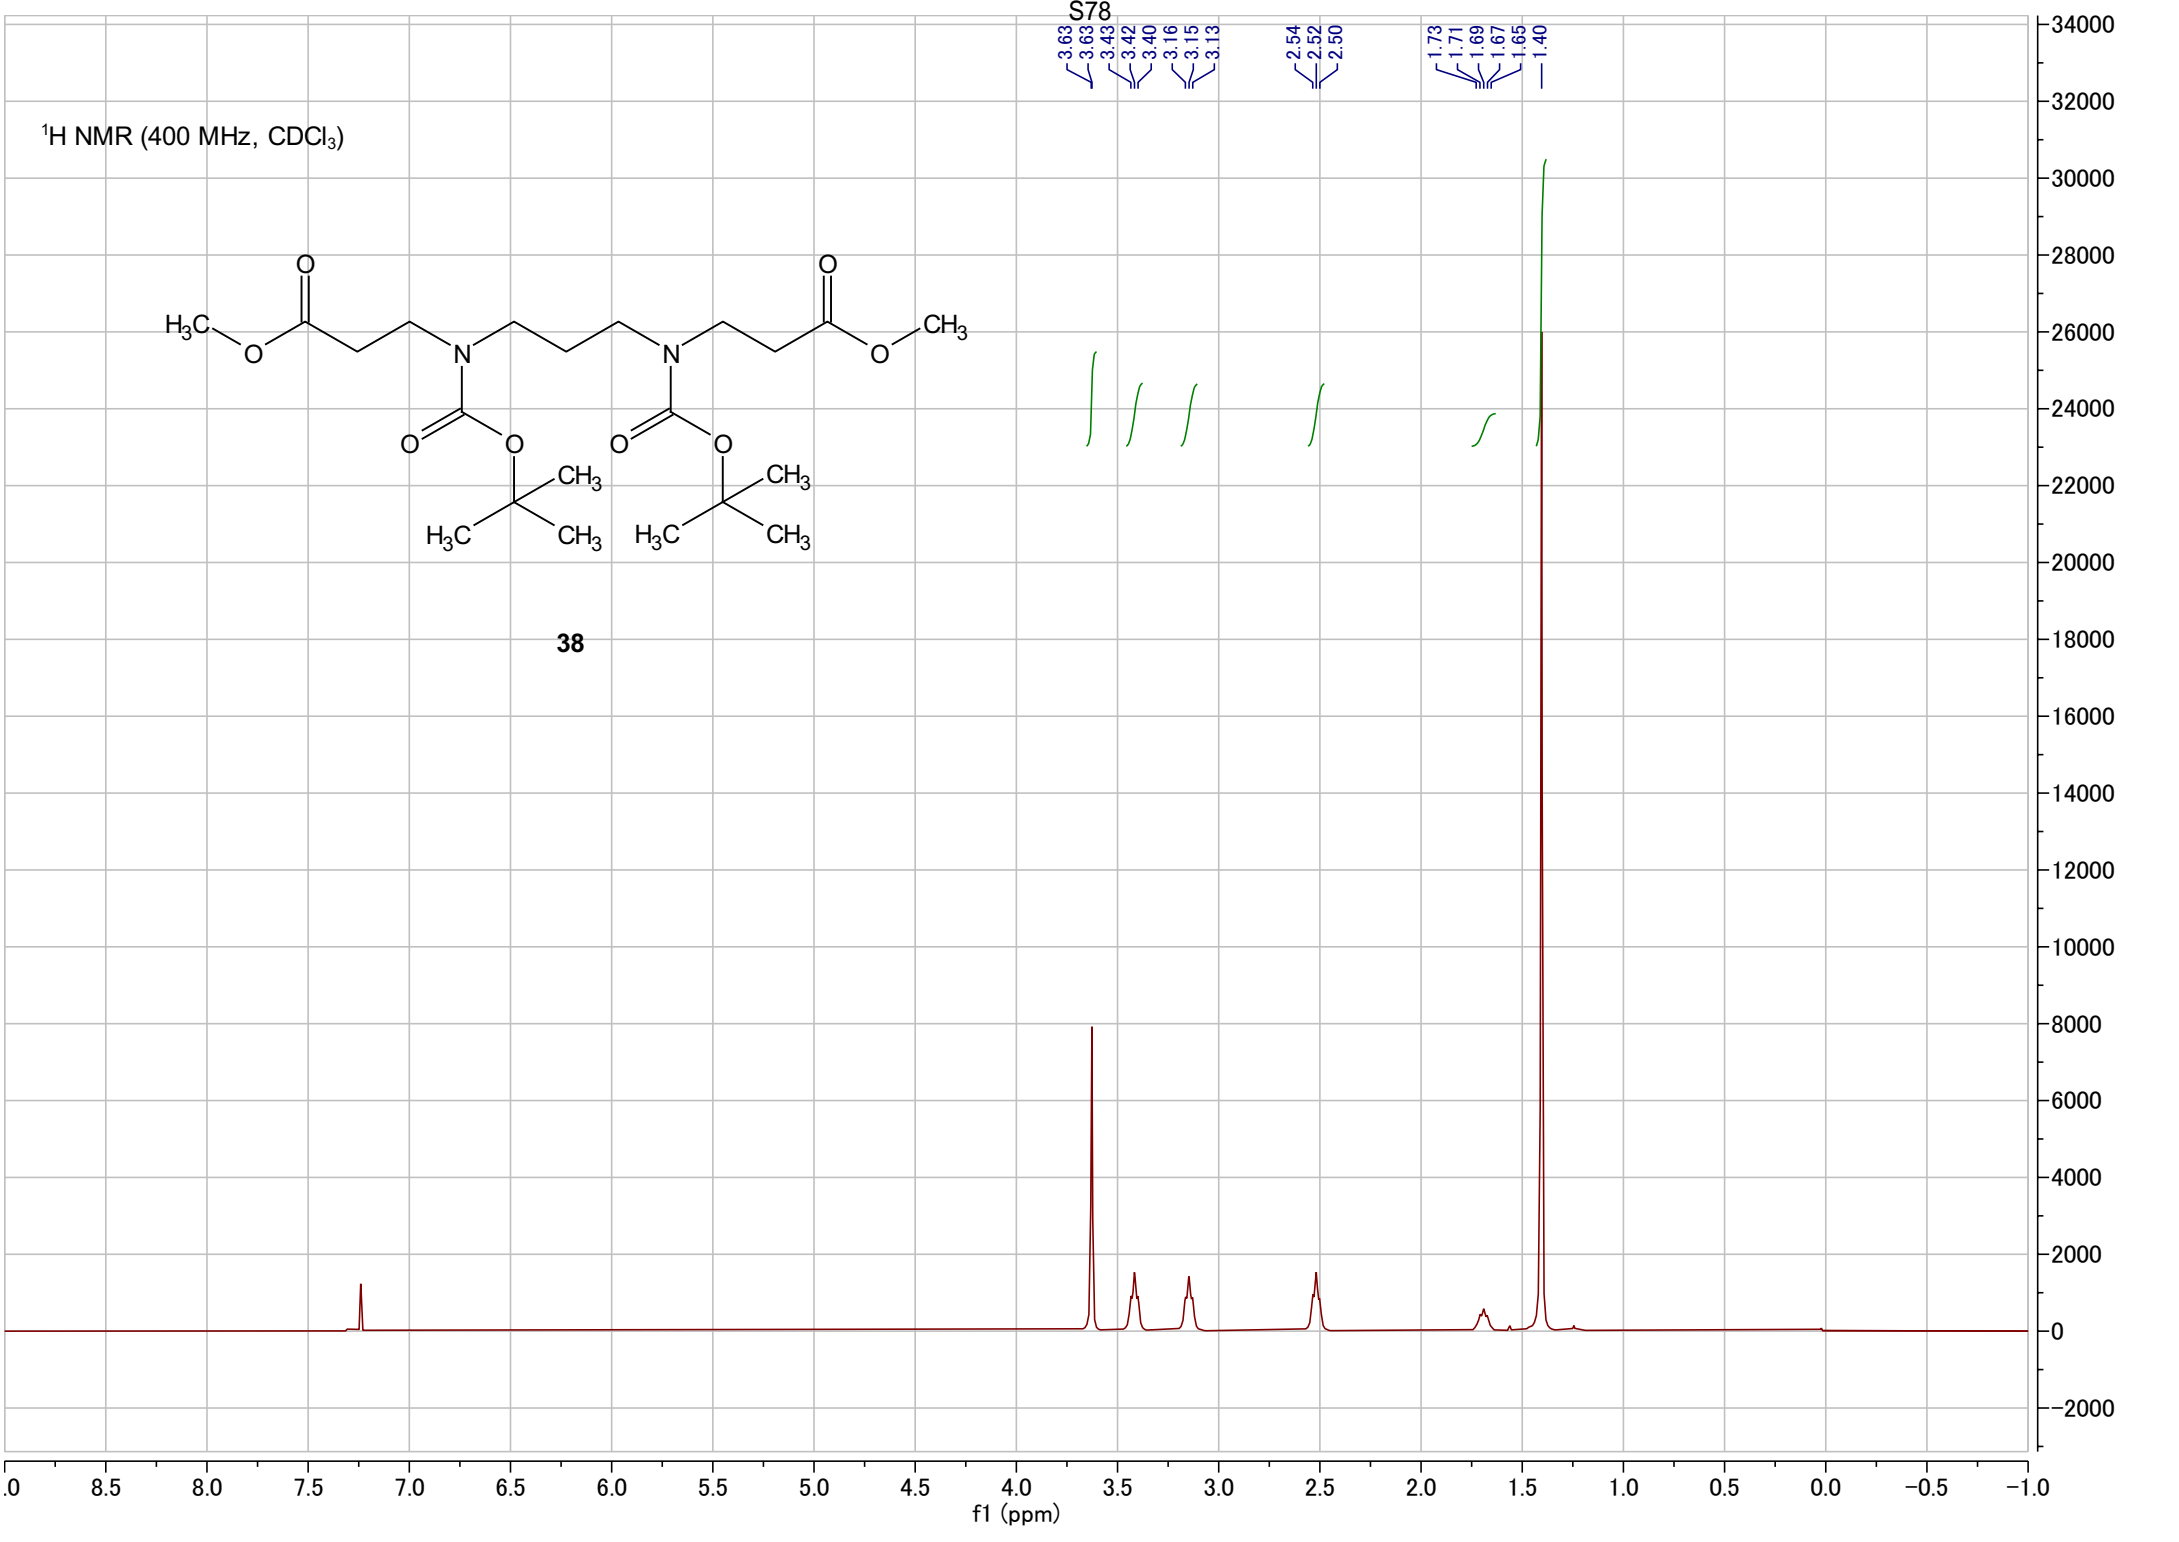

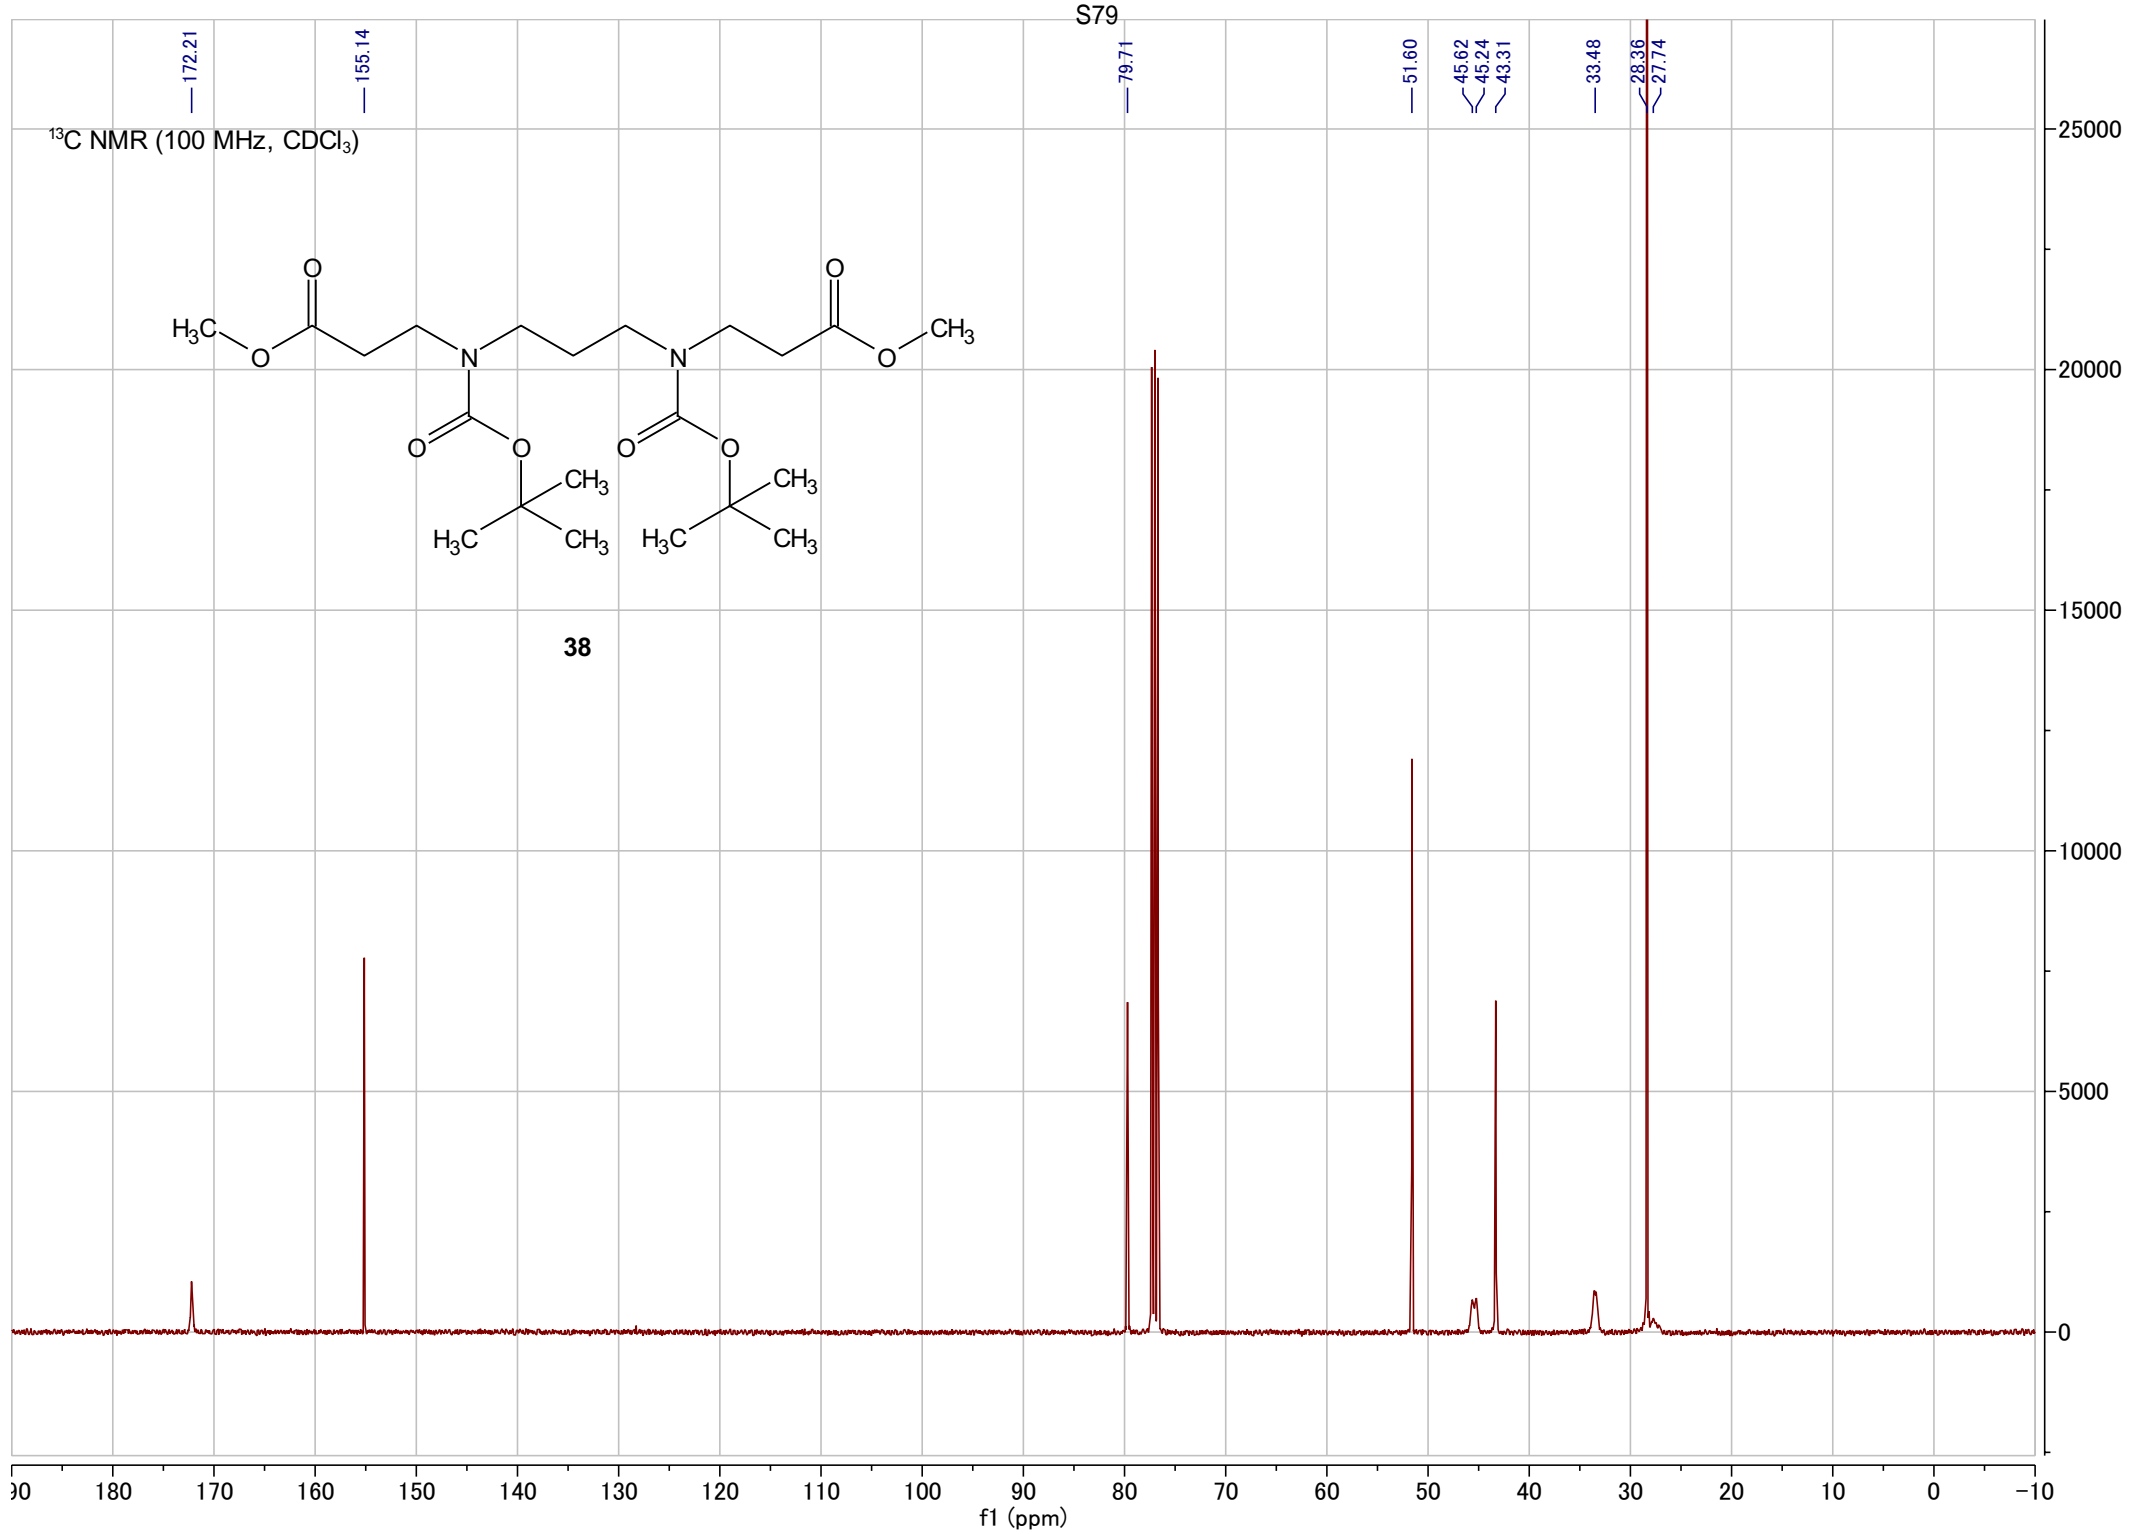

<sup>1</sup>H NMR (400 MHz, CDCl<sub>3</sub>)

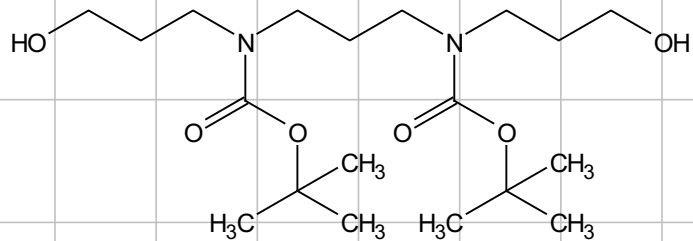

**39**

S80  
3.55  
3.53  
3.52  
3.34  
3.32  
3.31  
3.14  
3.12  
3.10

1.78  
1.76  
1.74  
1.72  
1.71  
1.69  
1.67  
1.65  
1.64  
1.62  
1.43

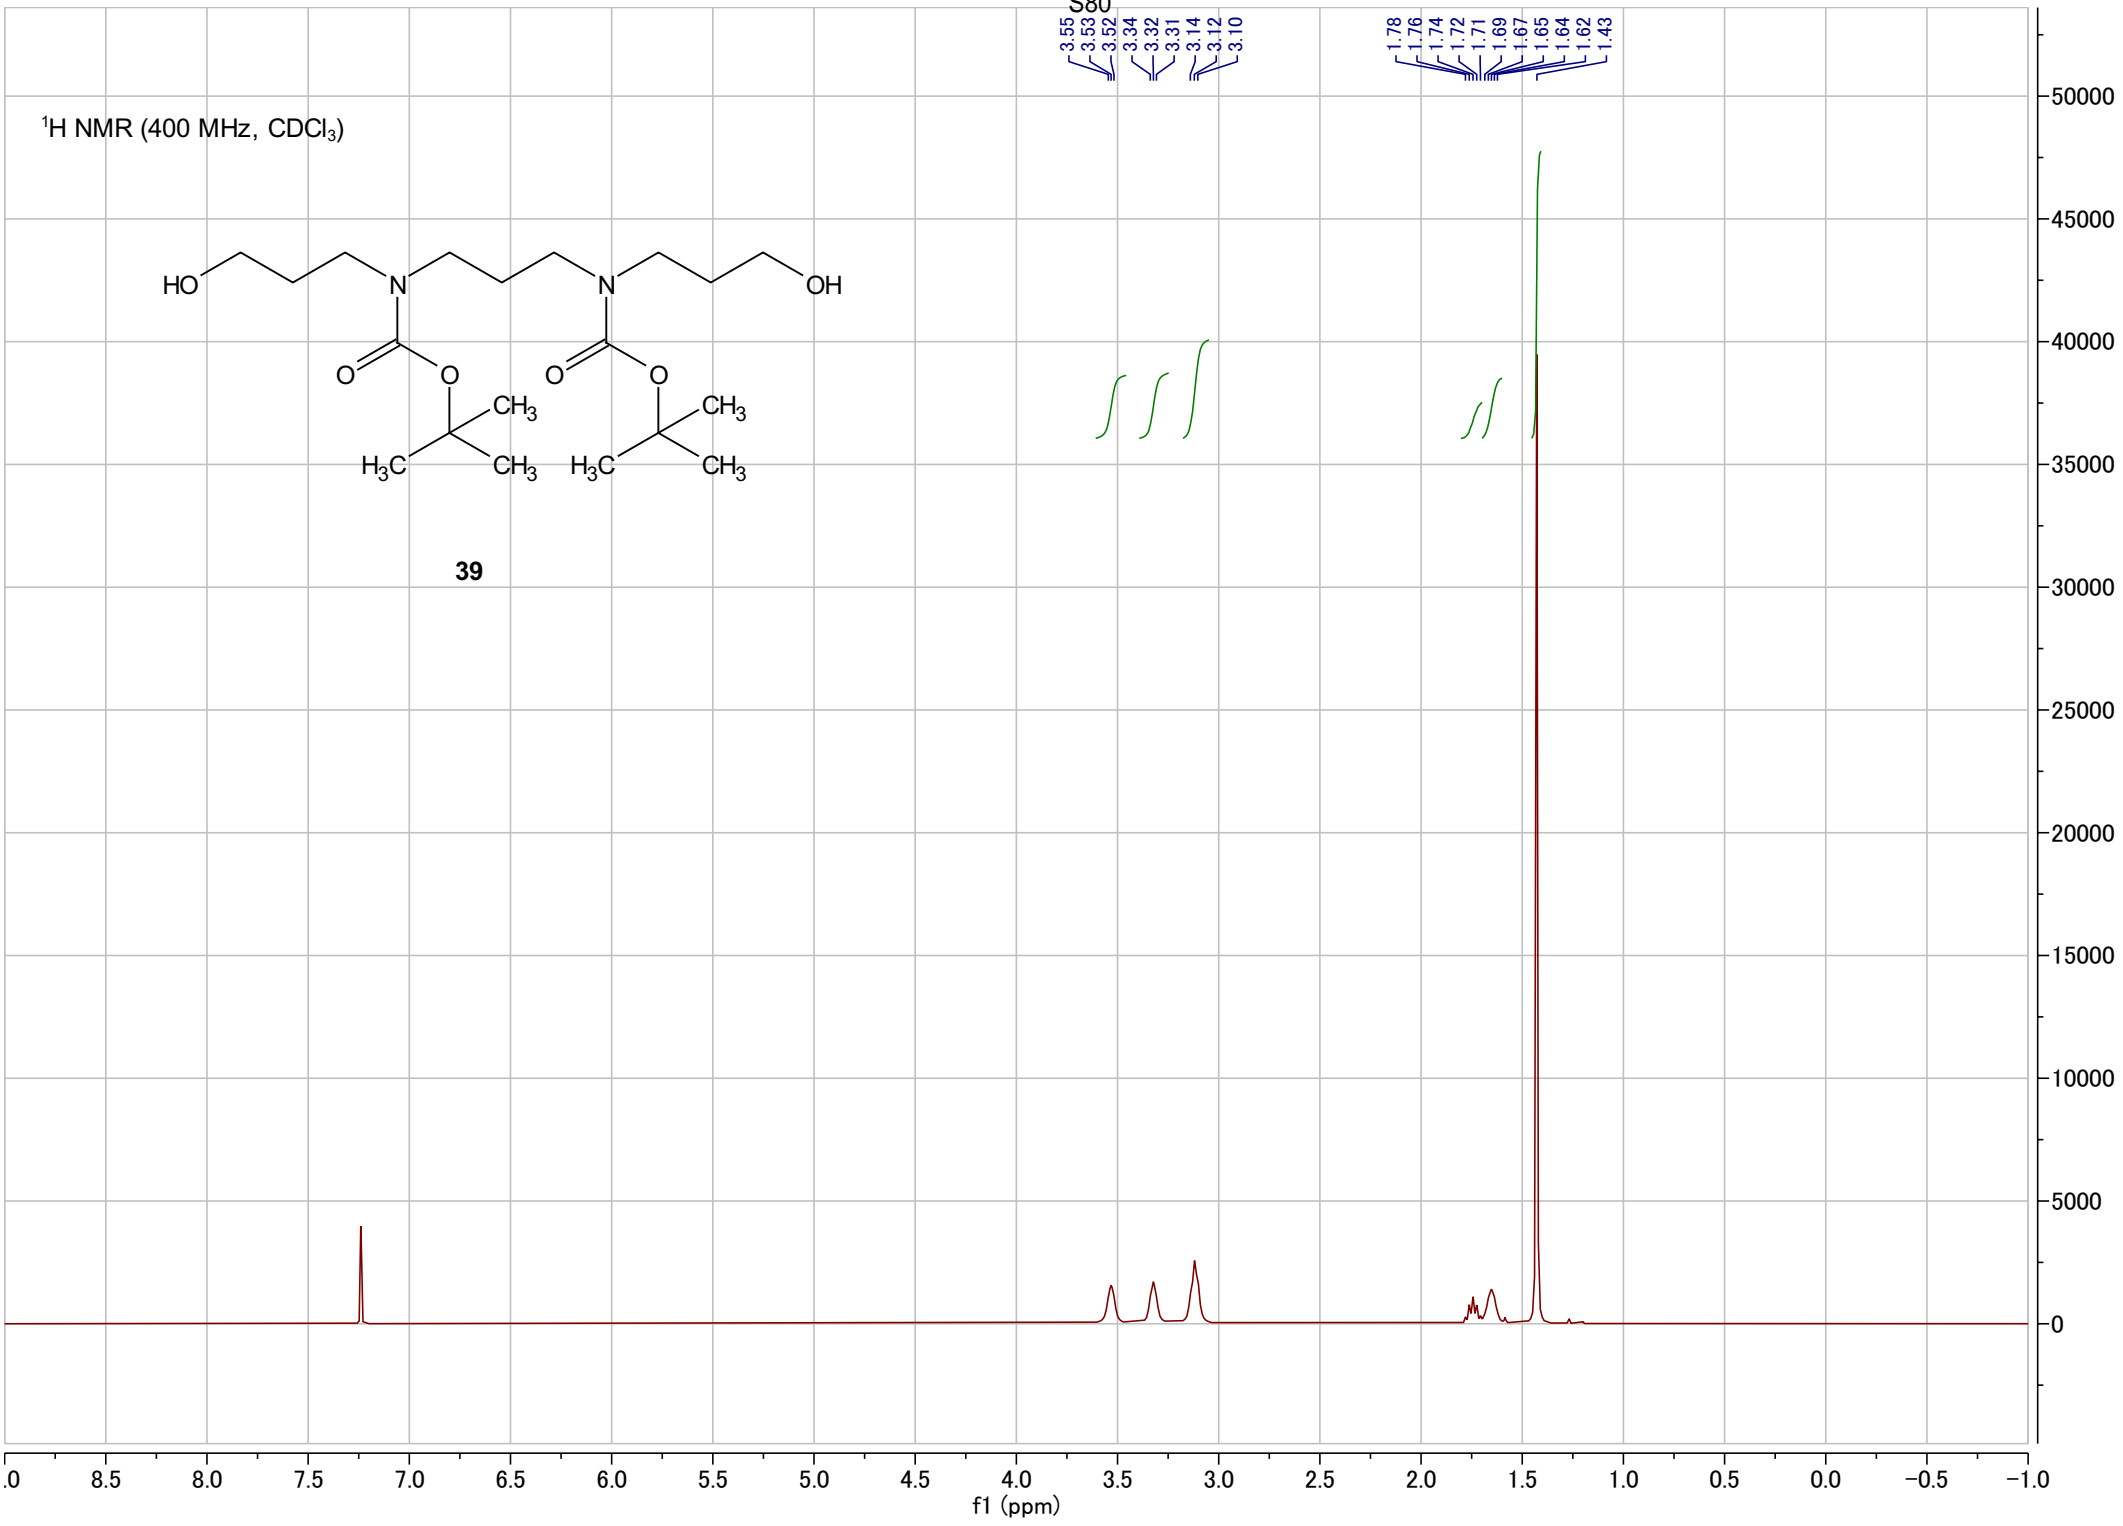





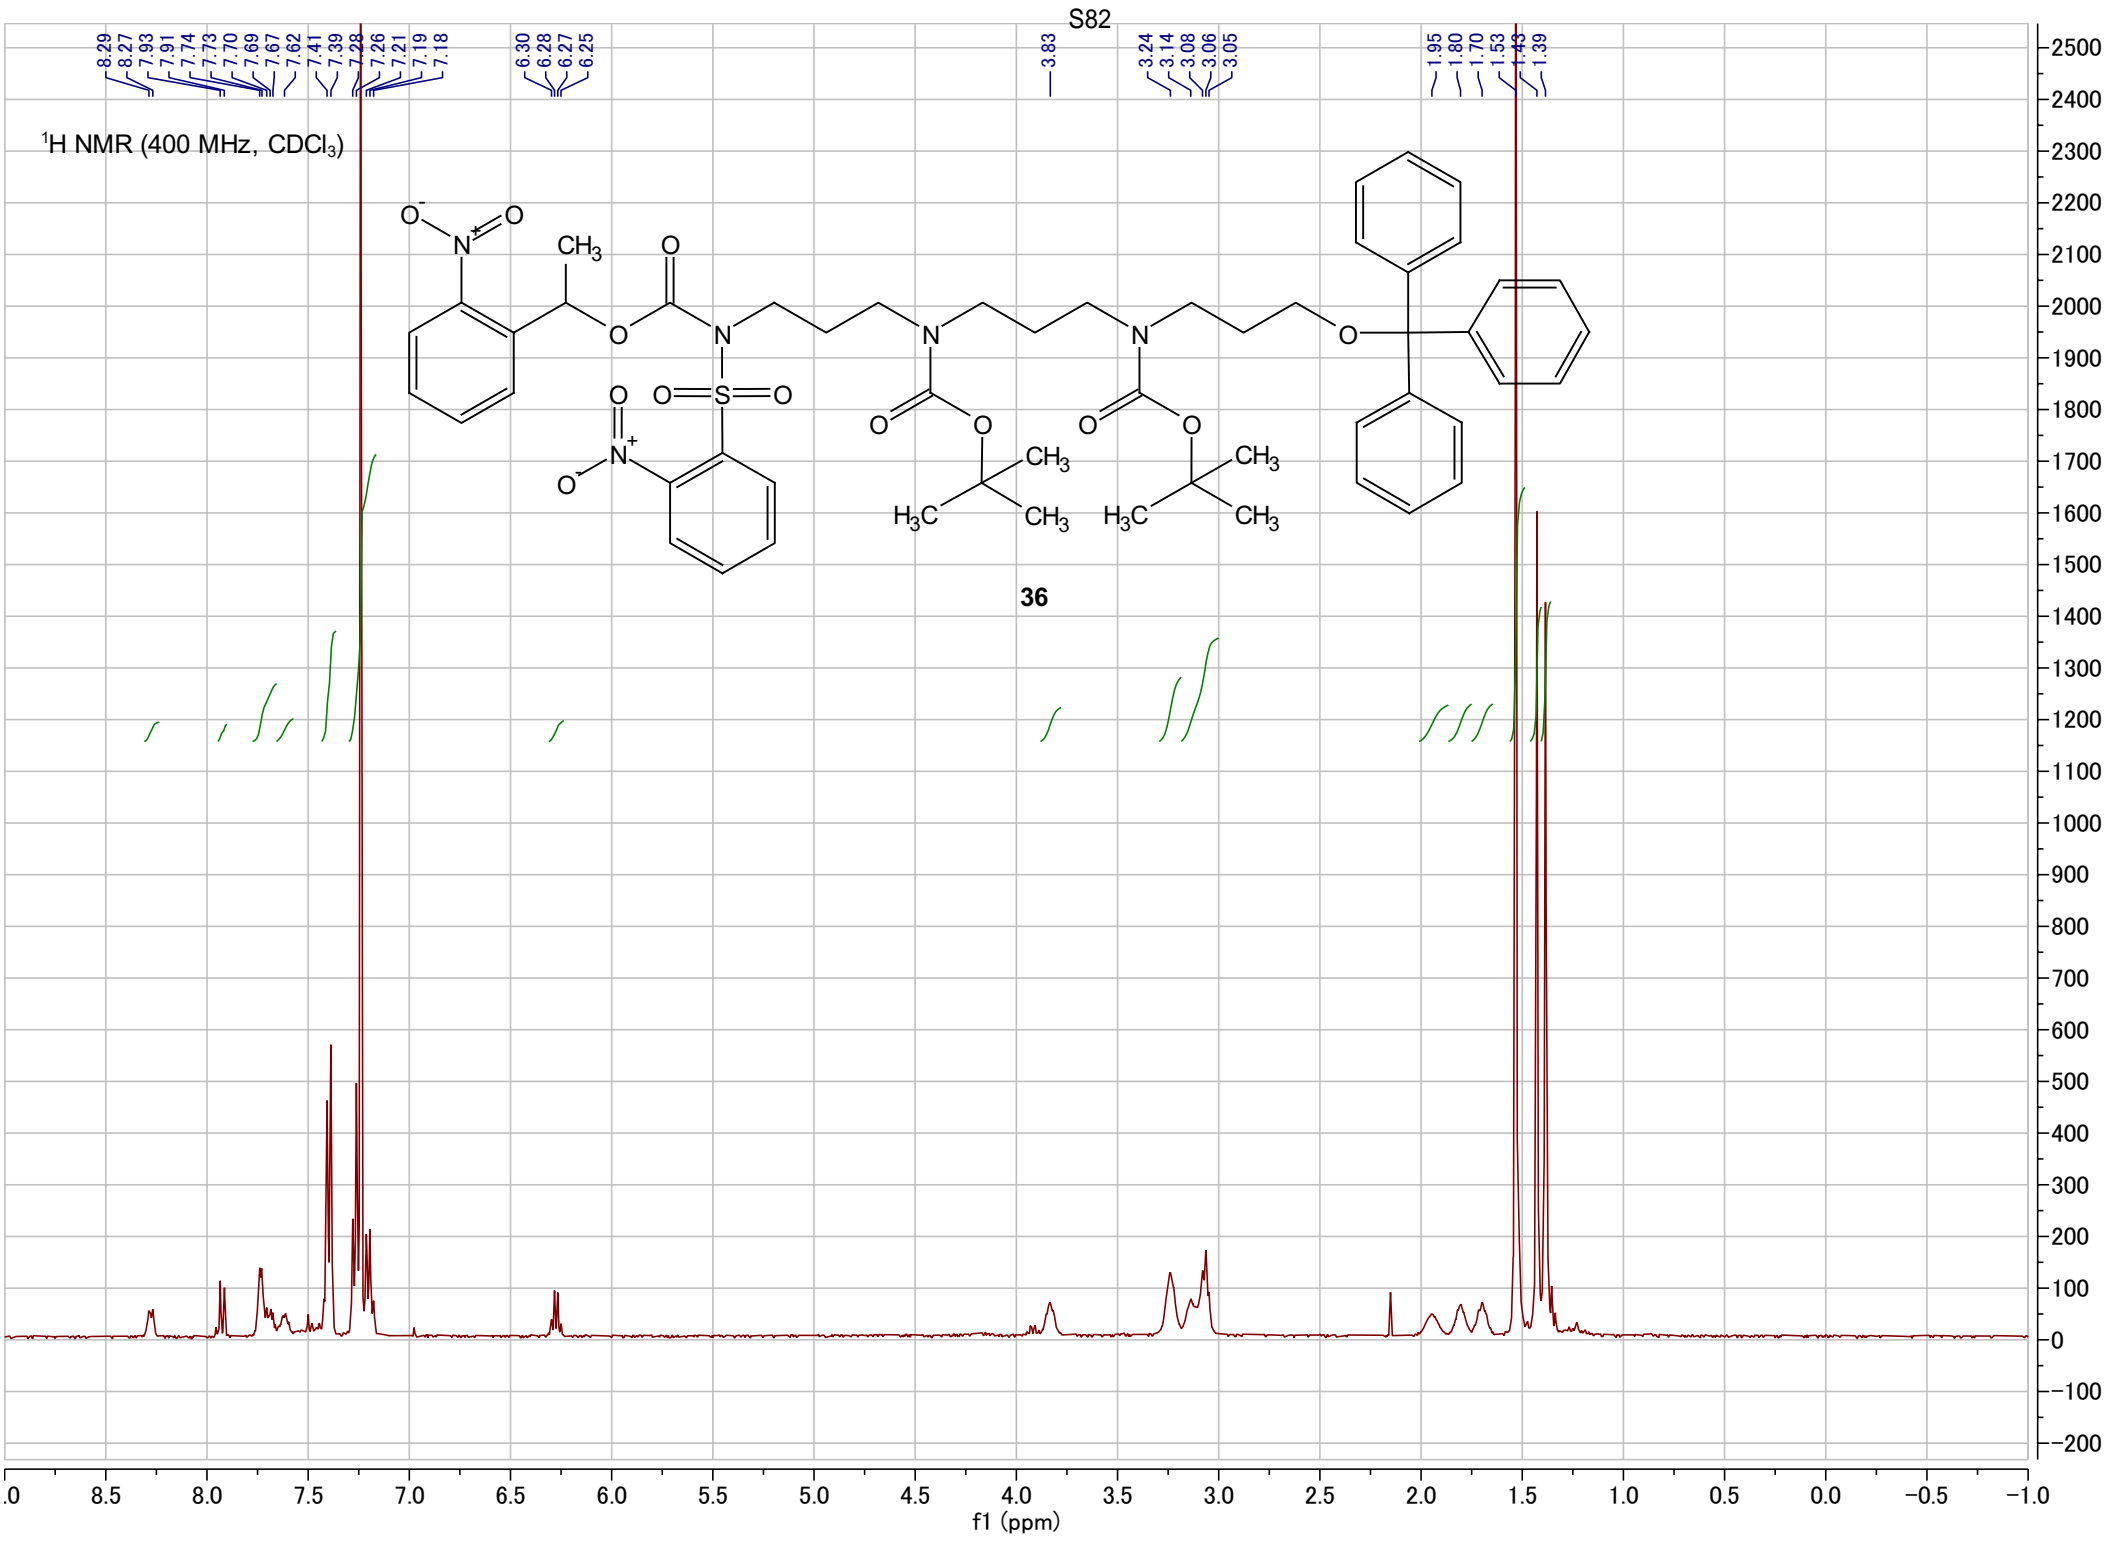

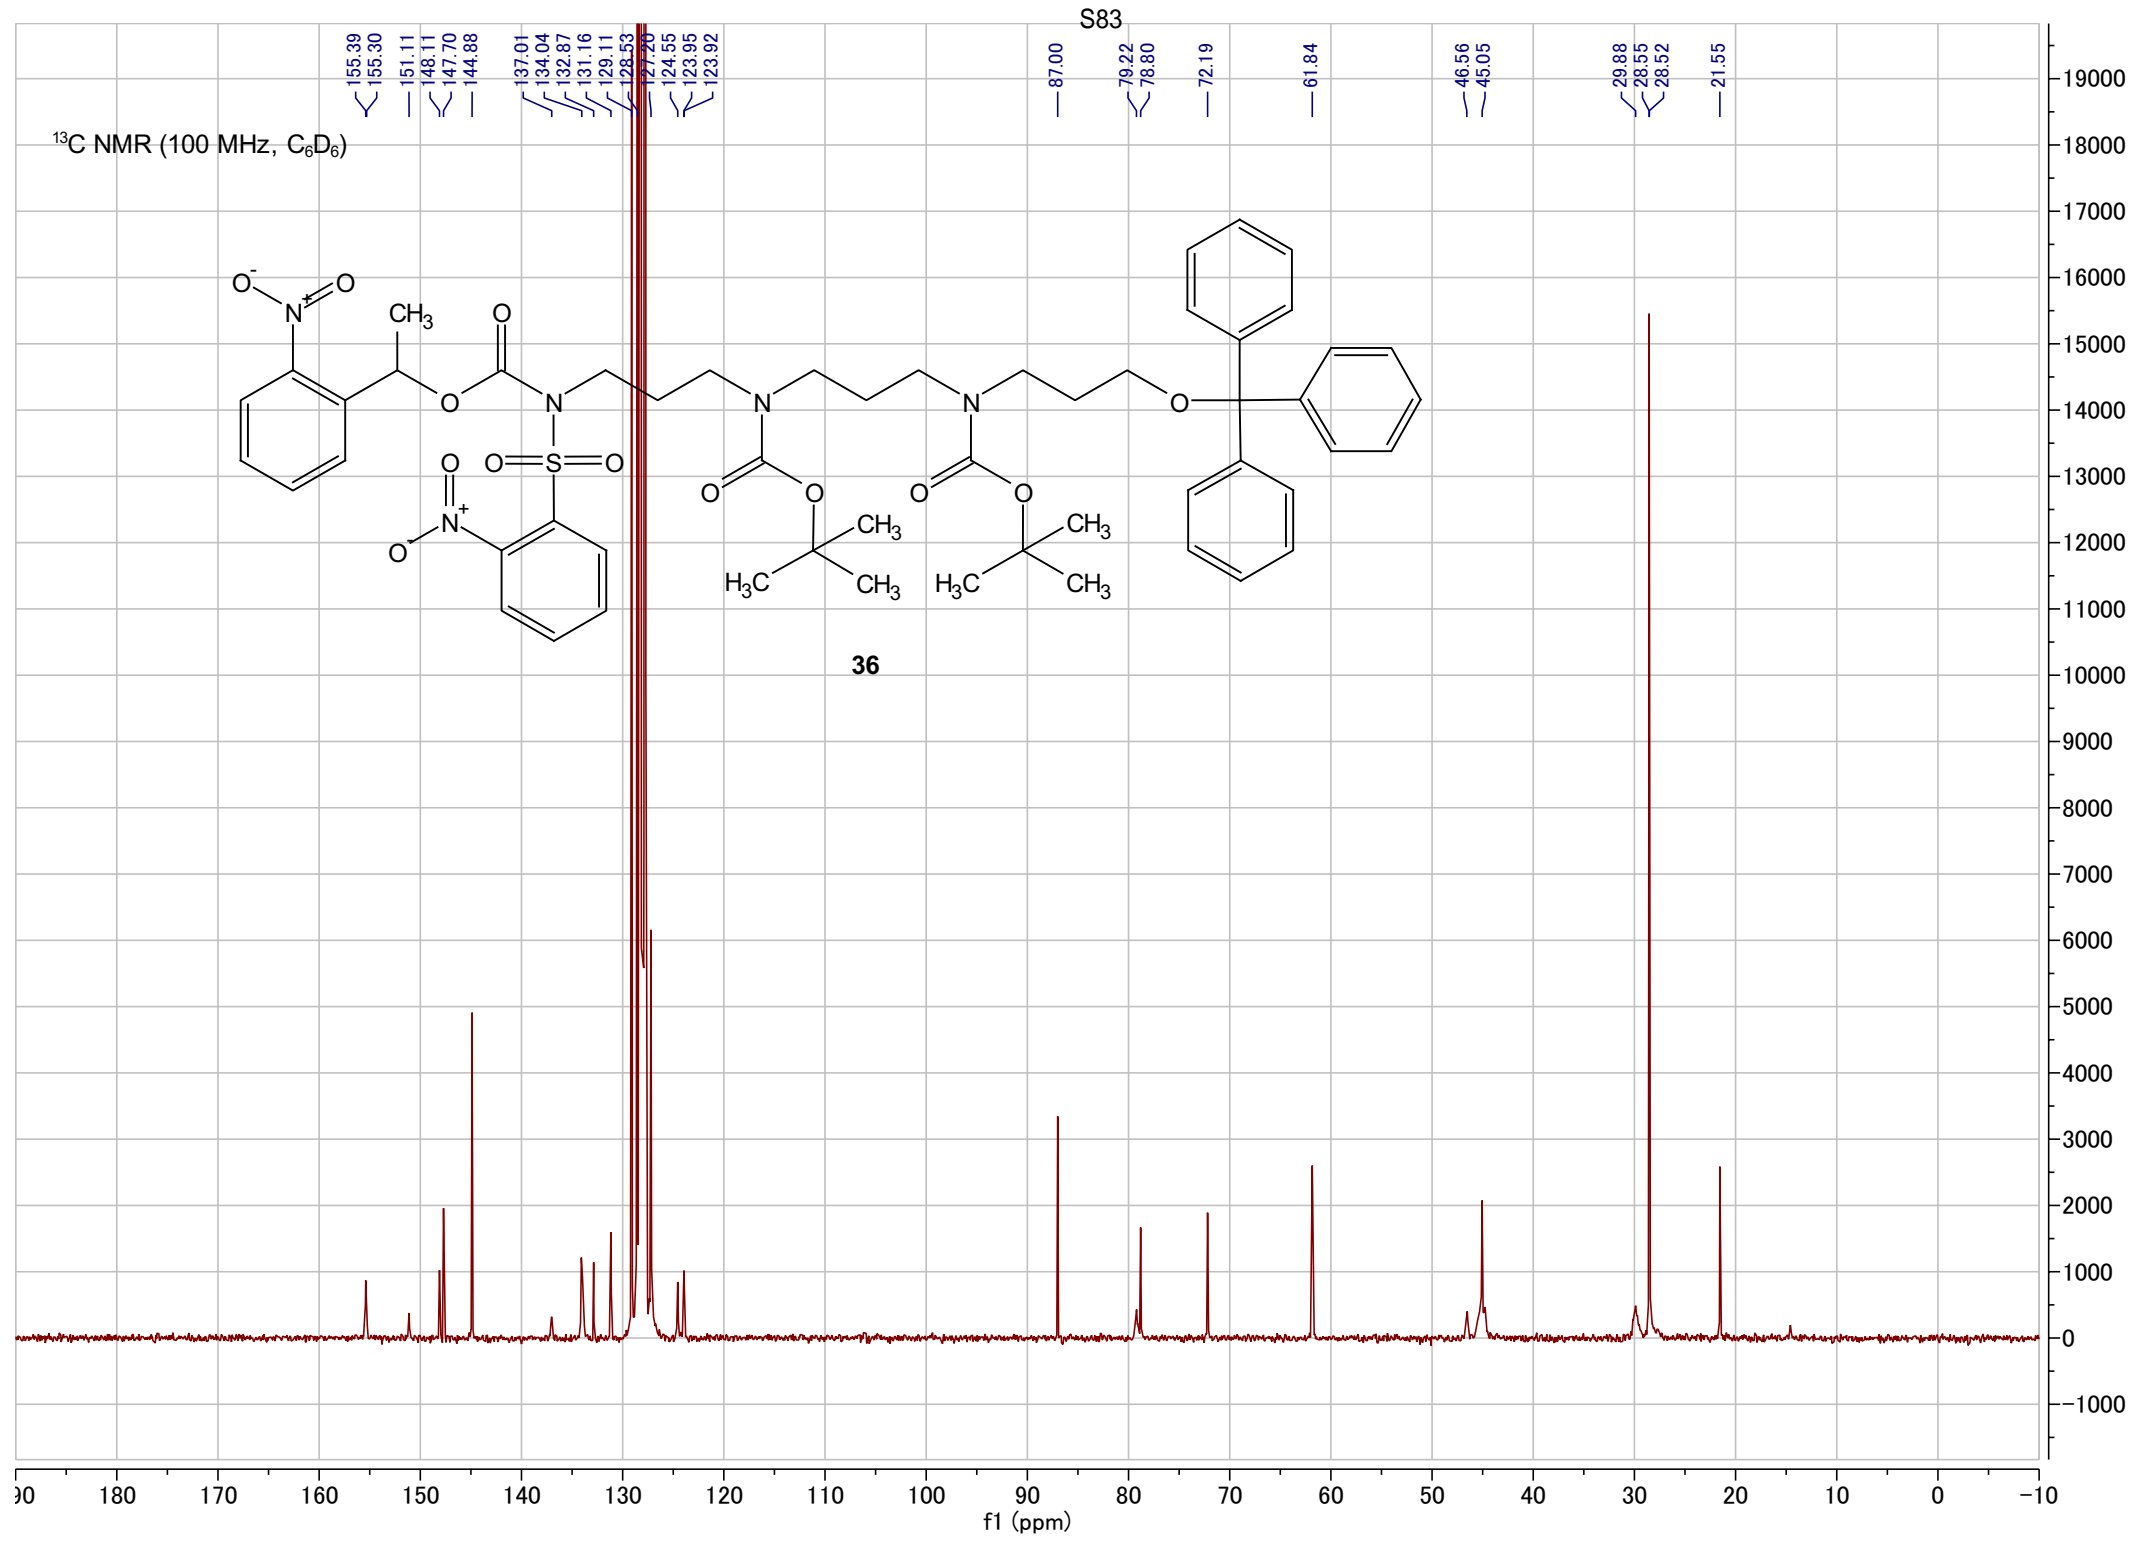

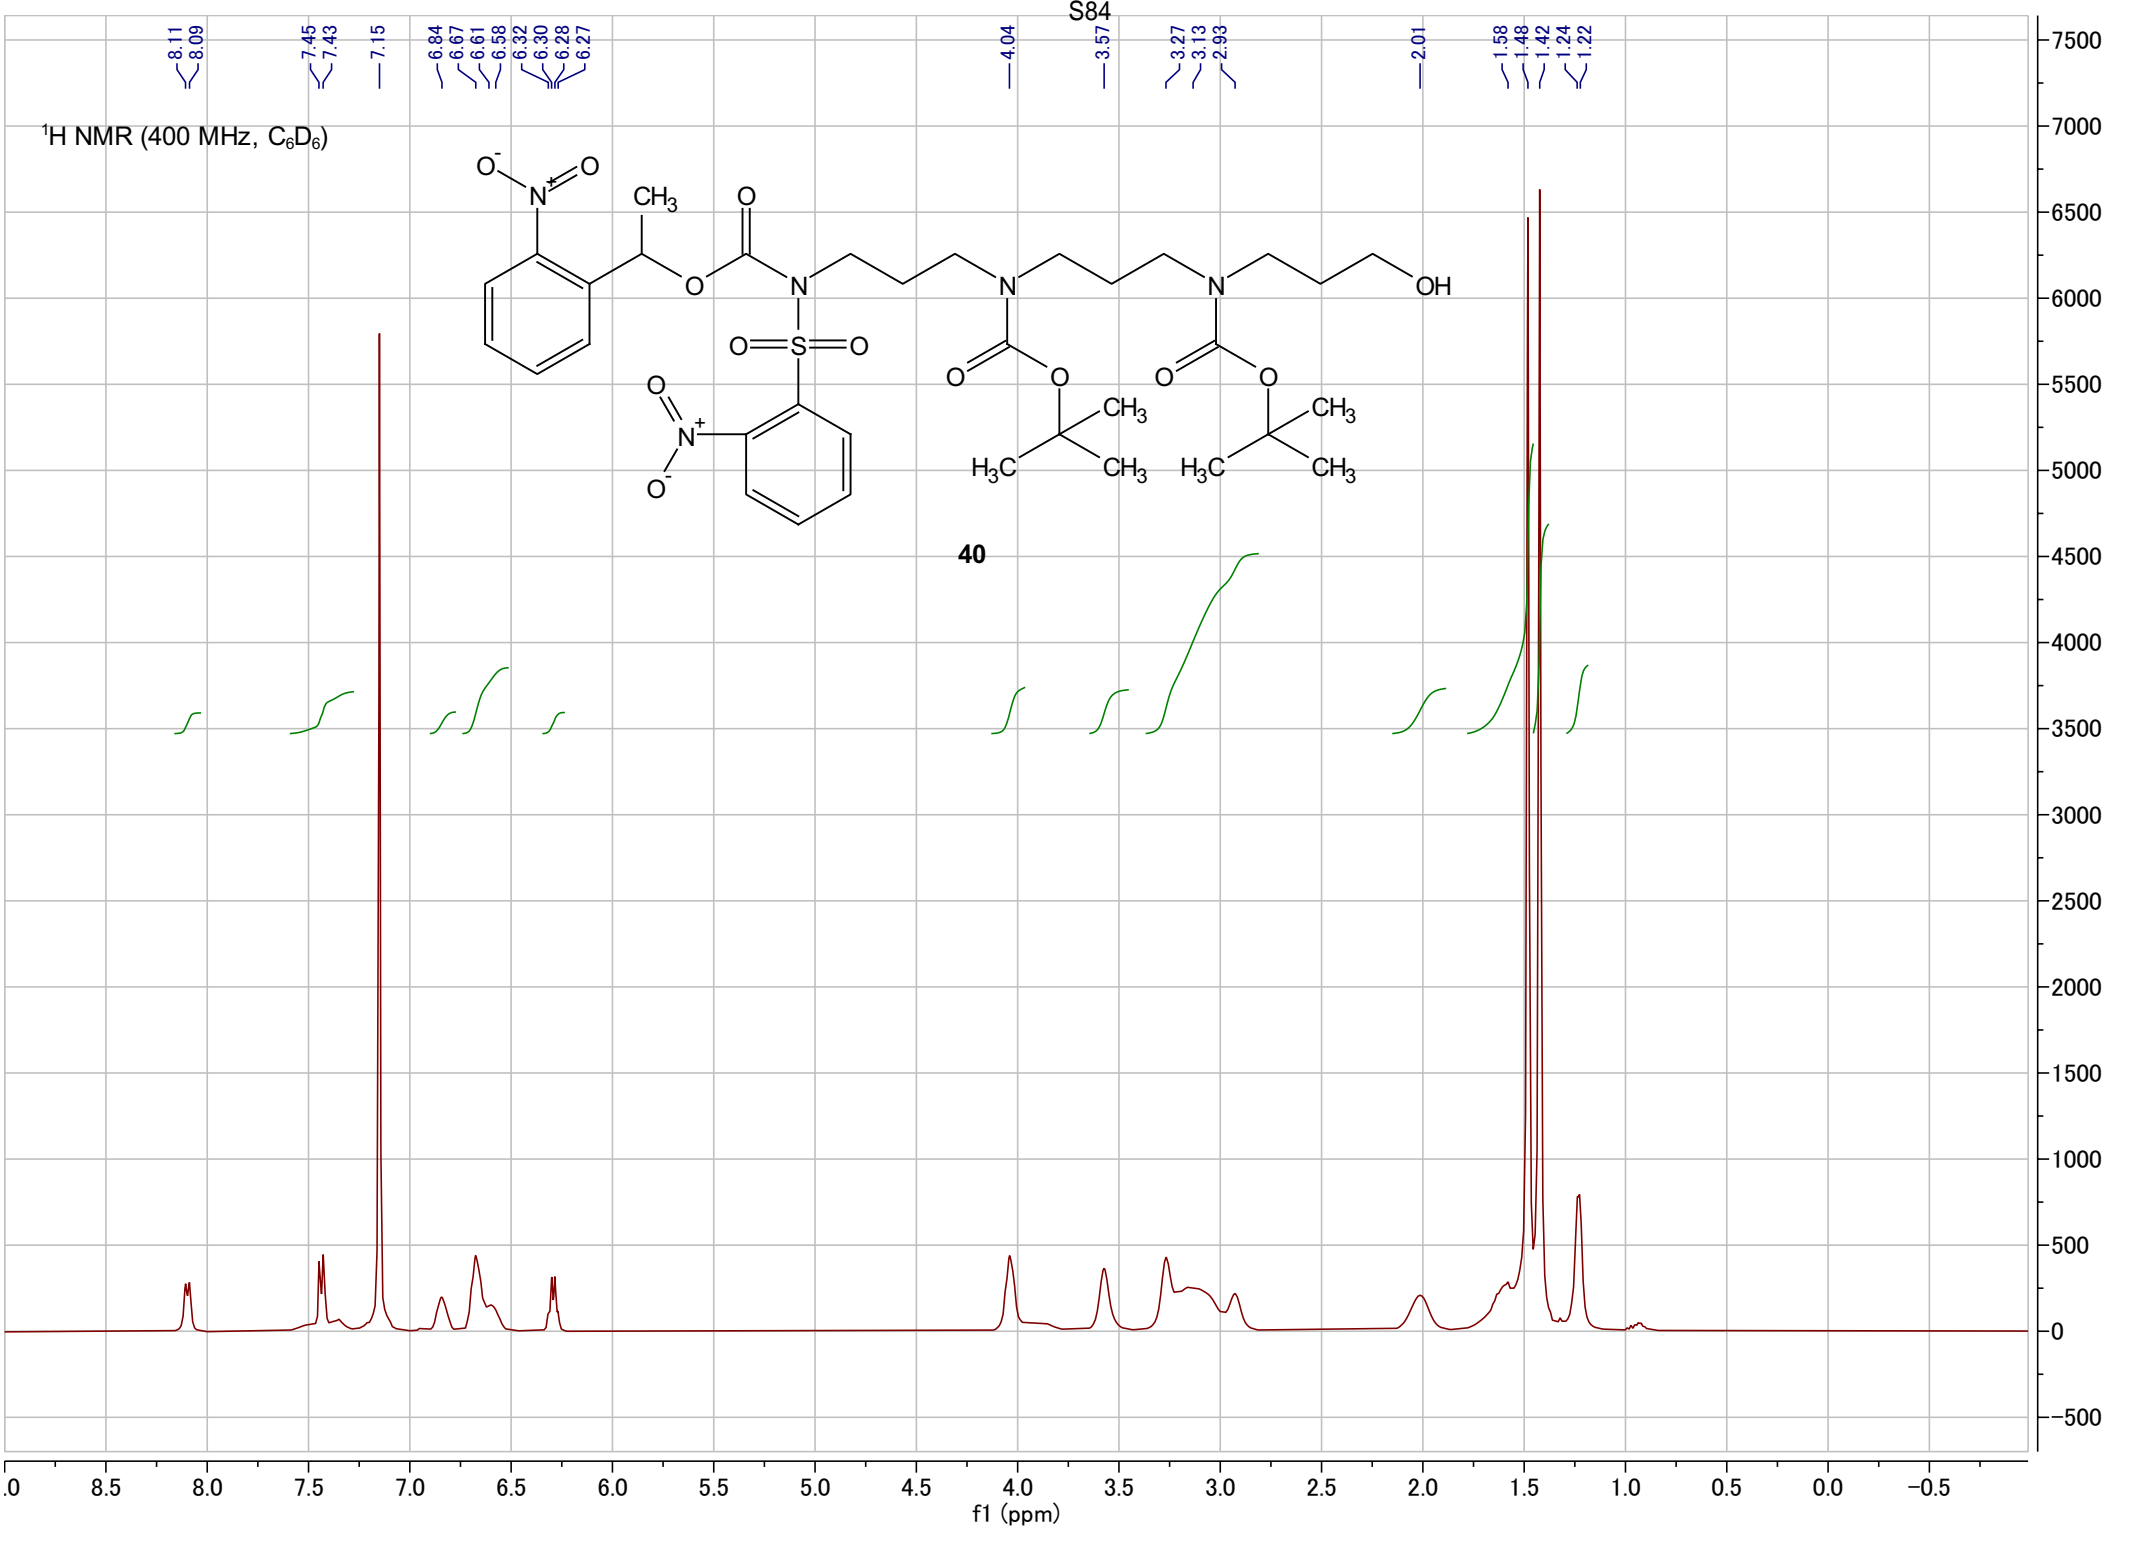

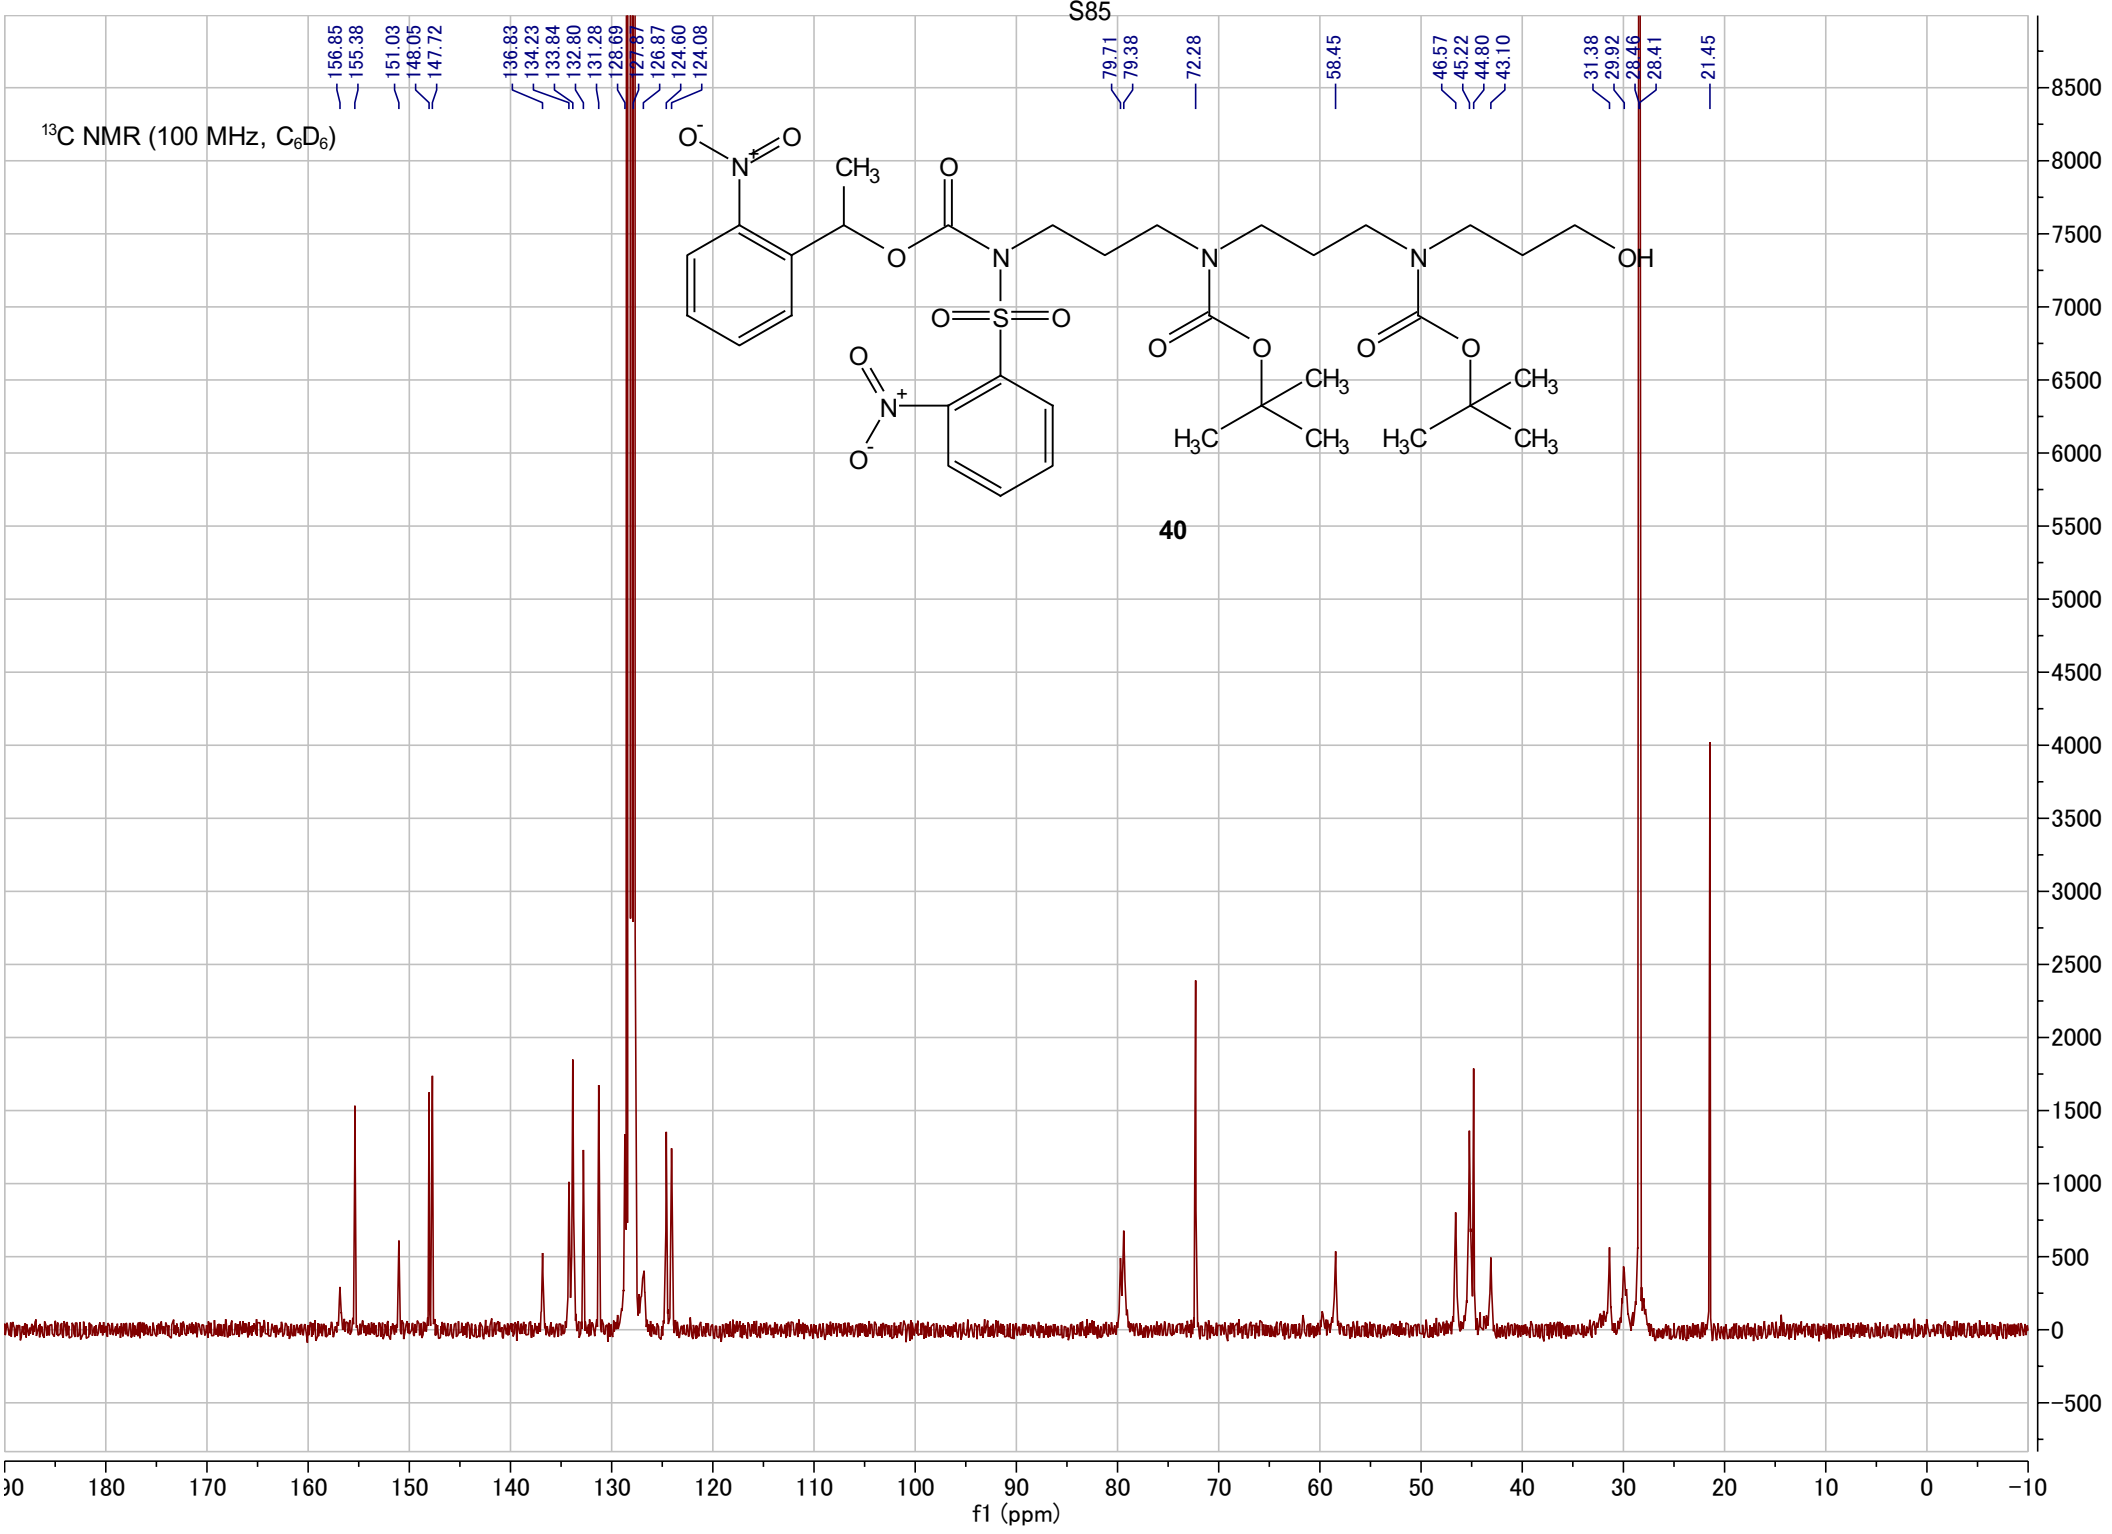

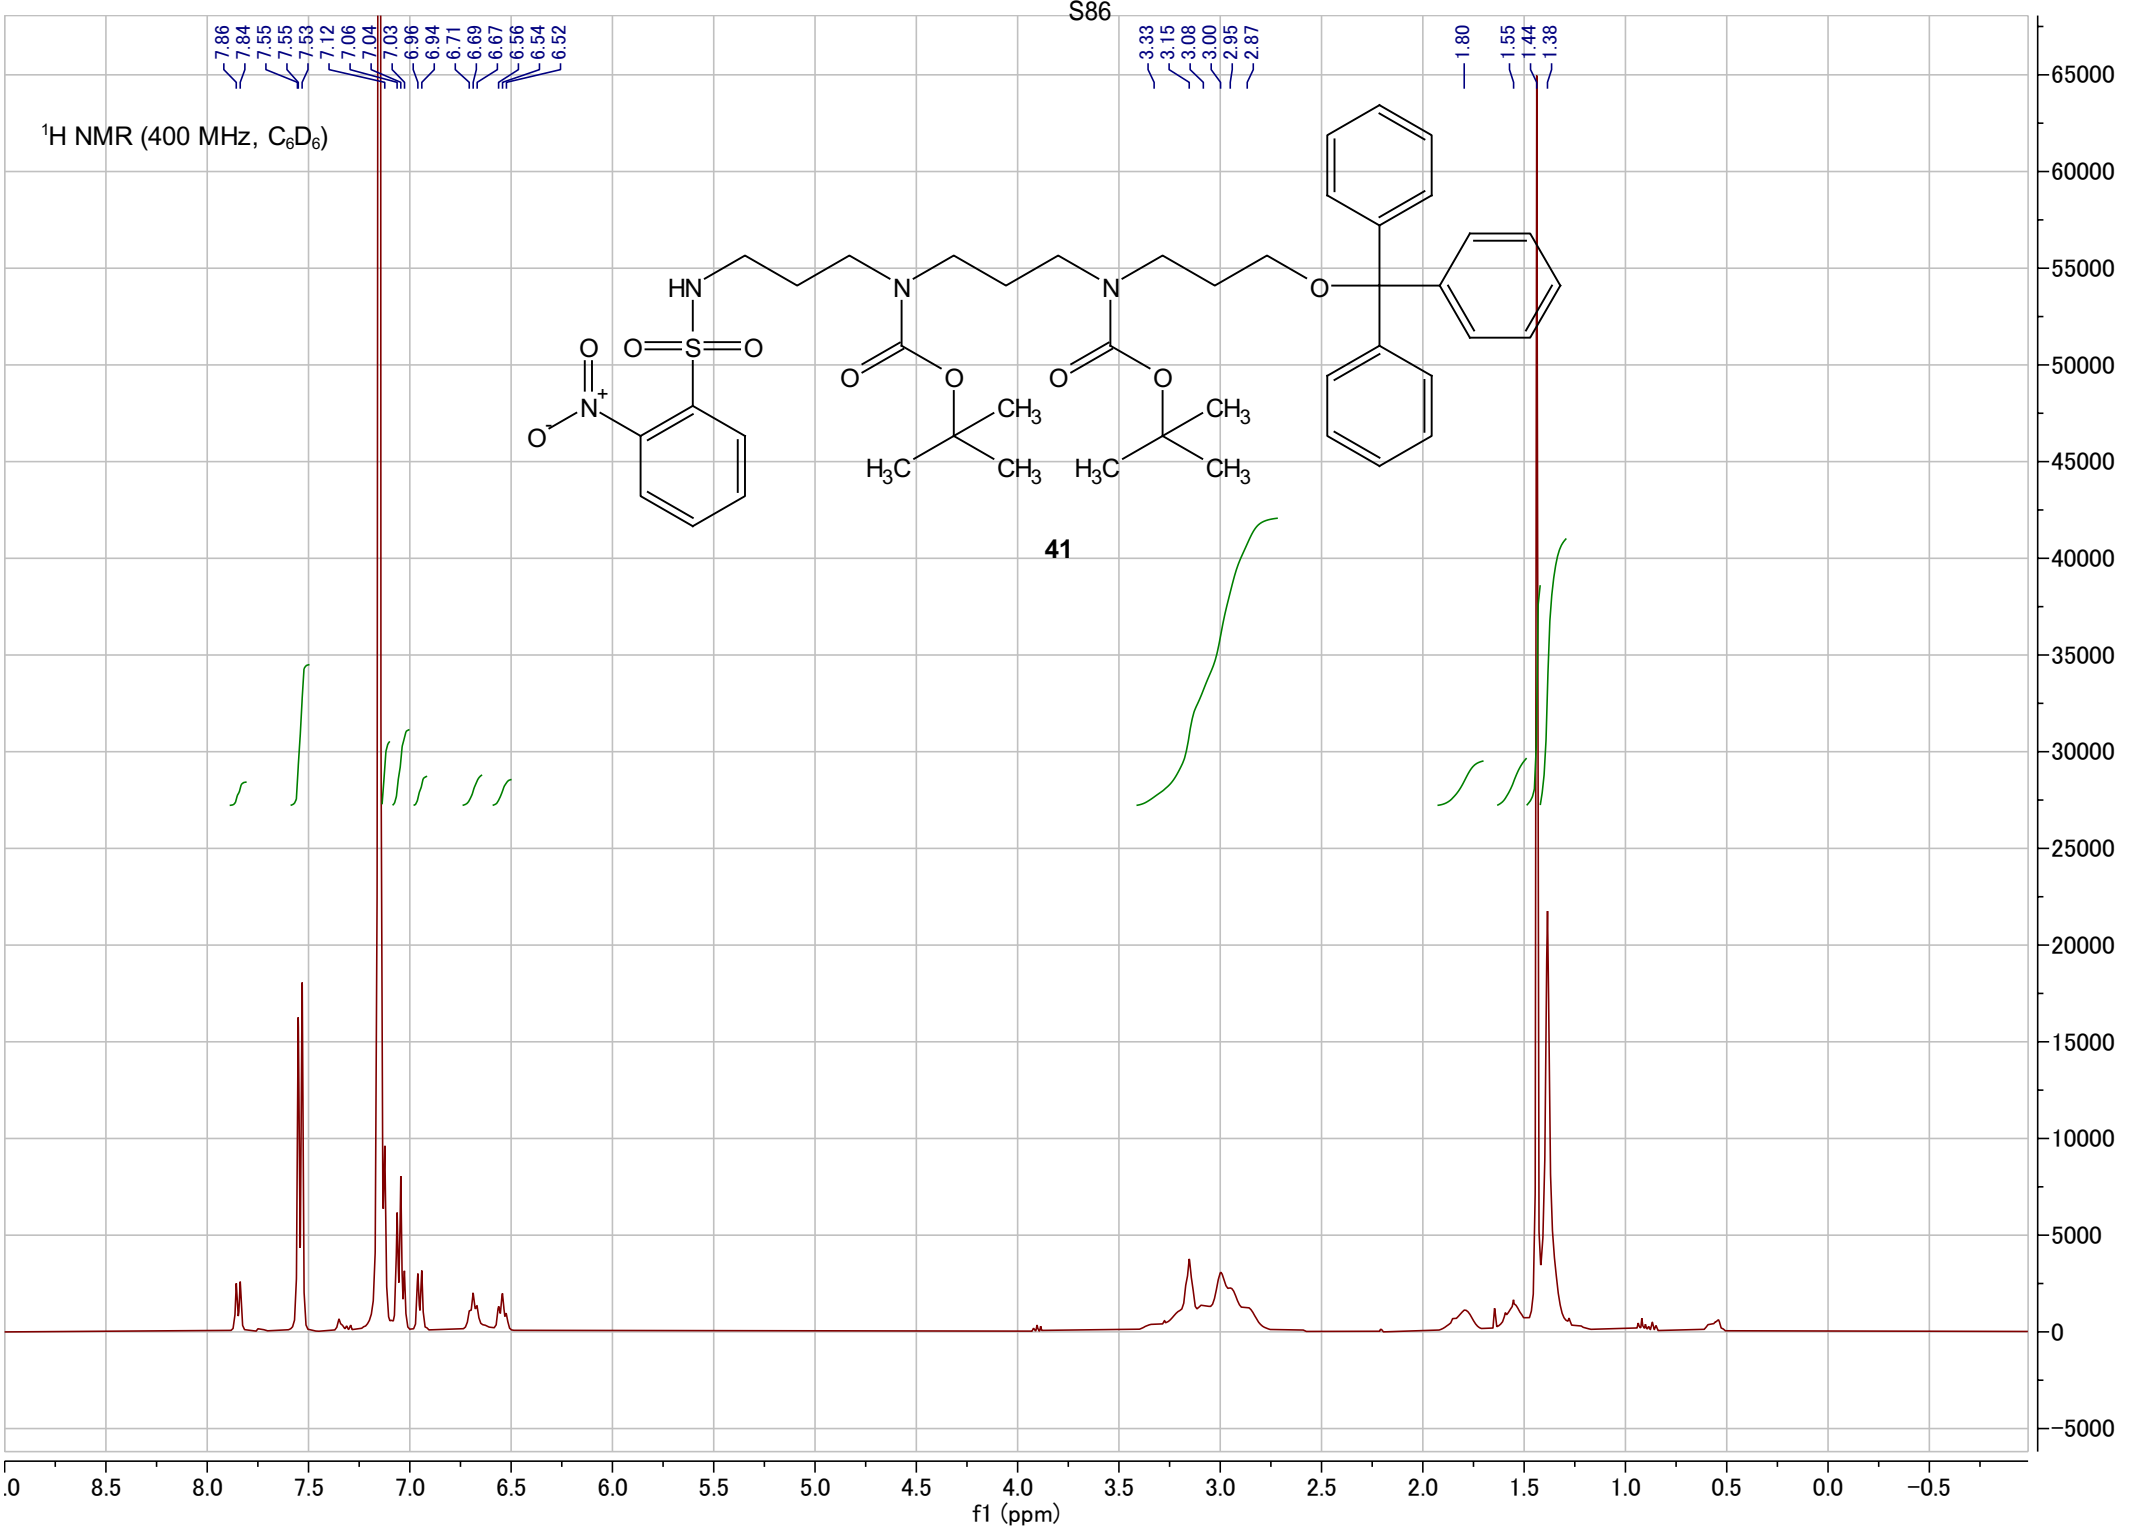

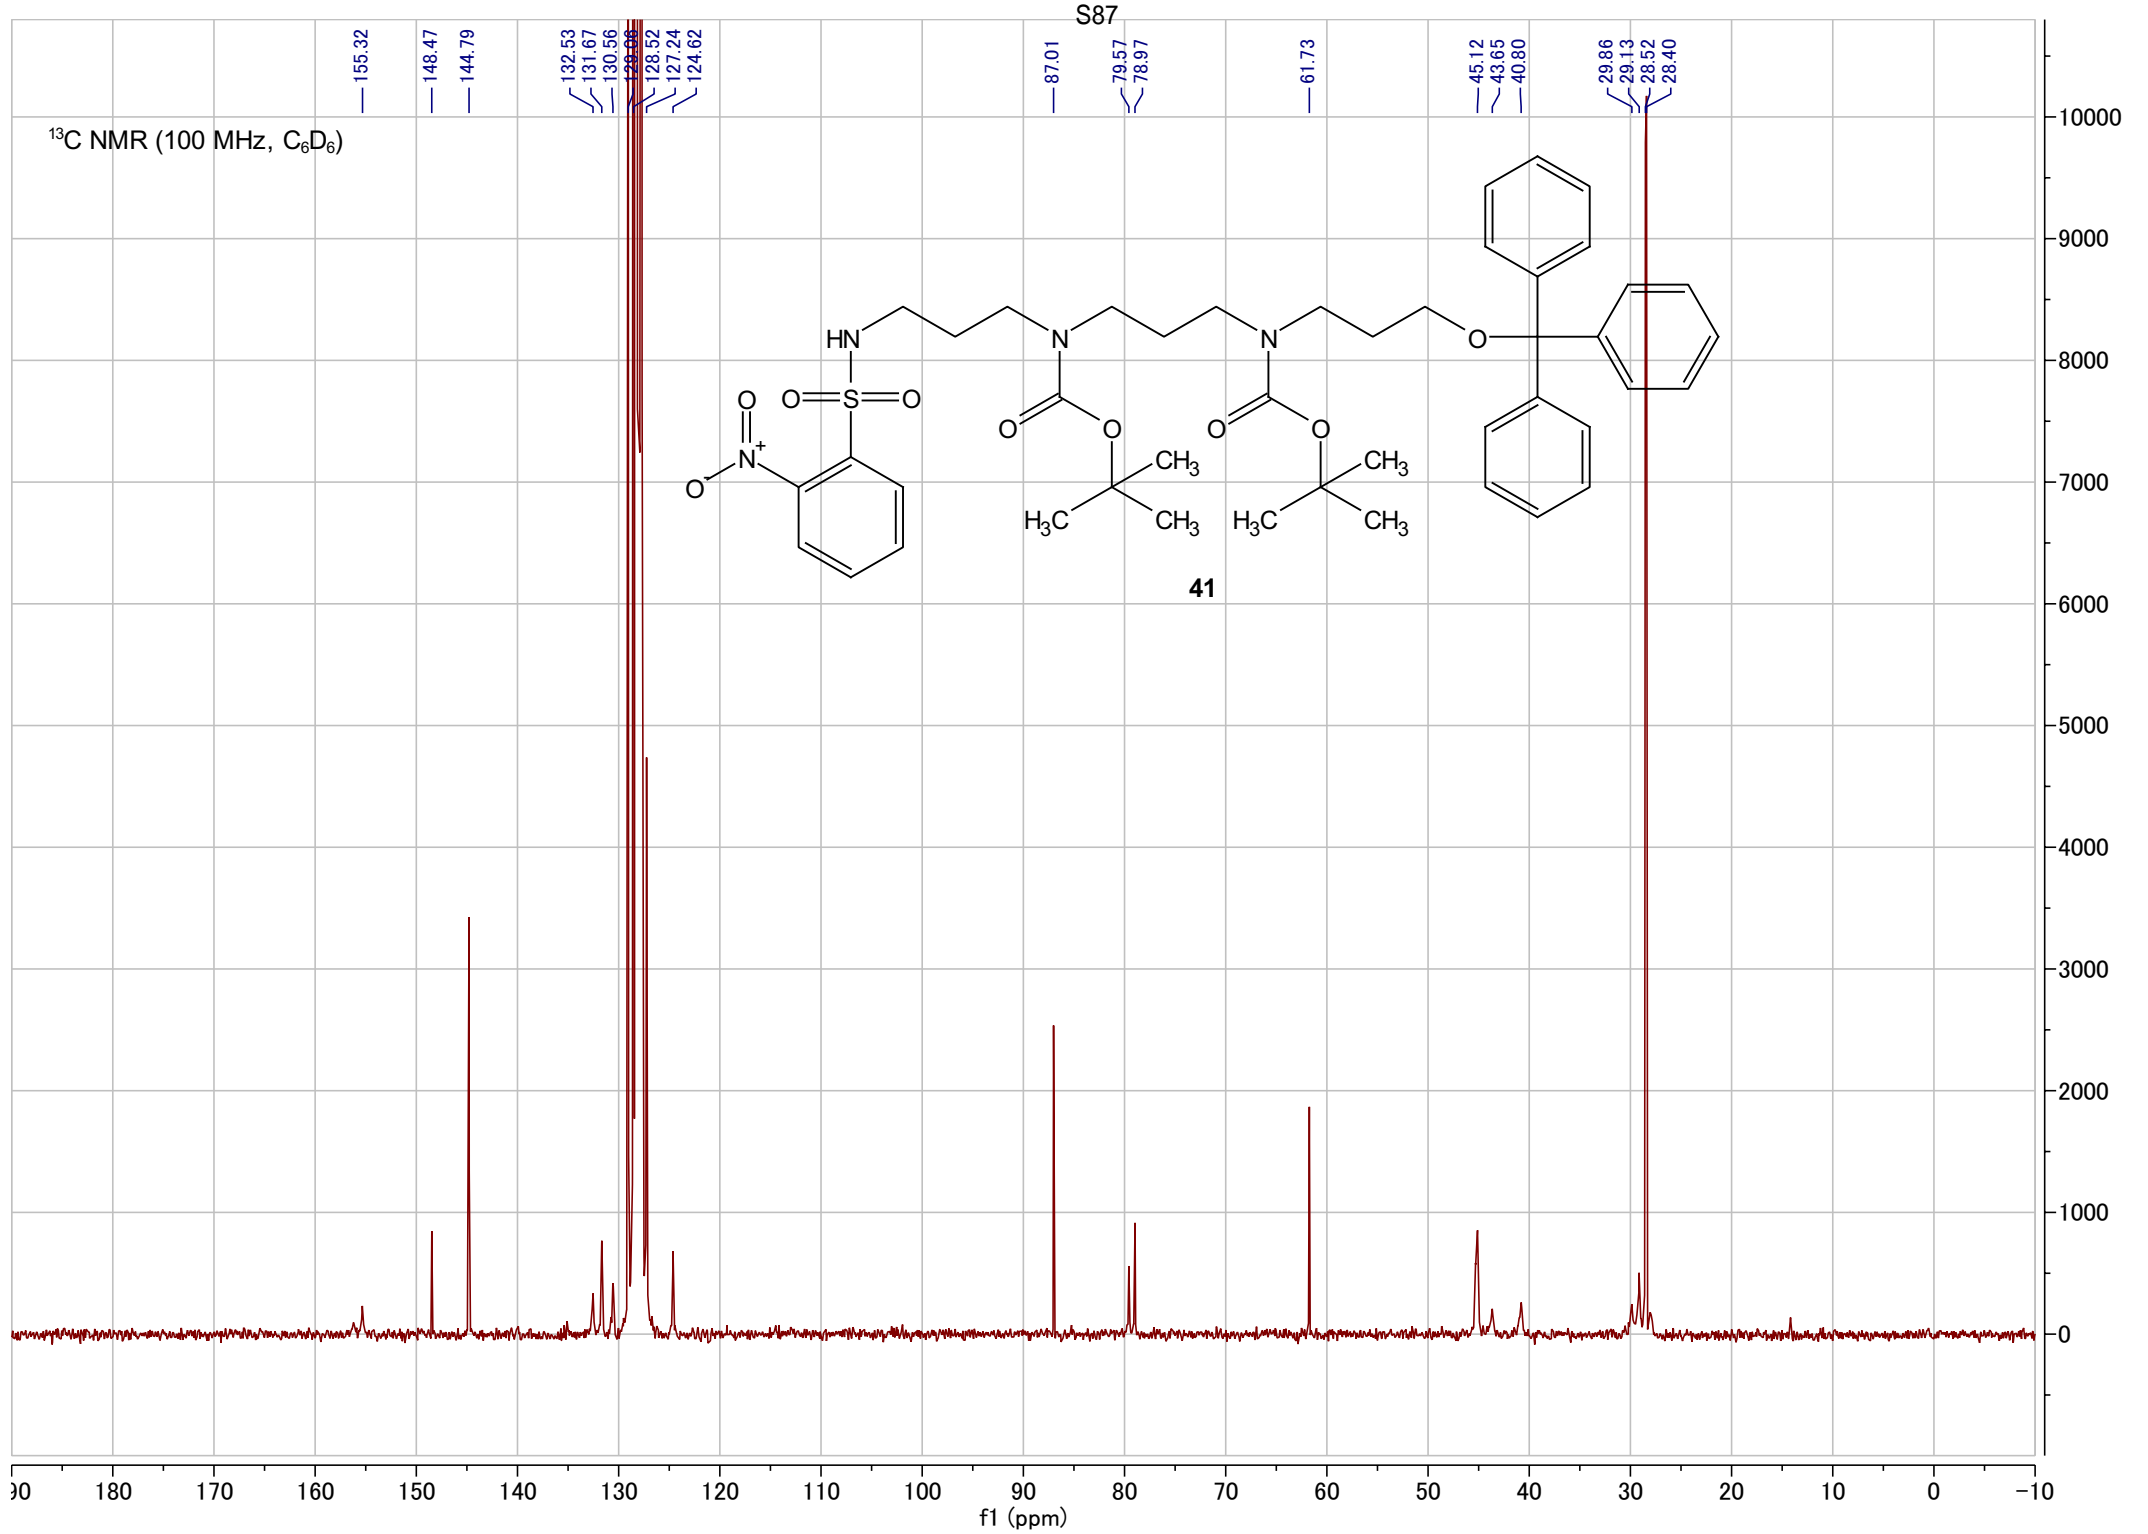

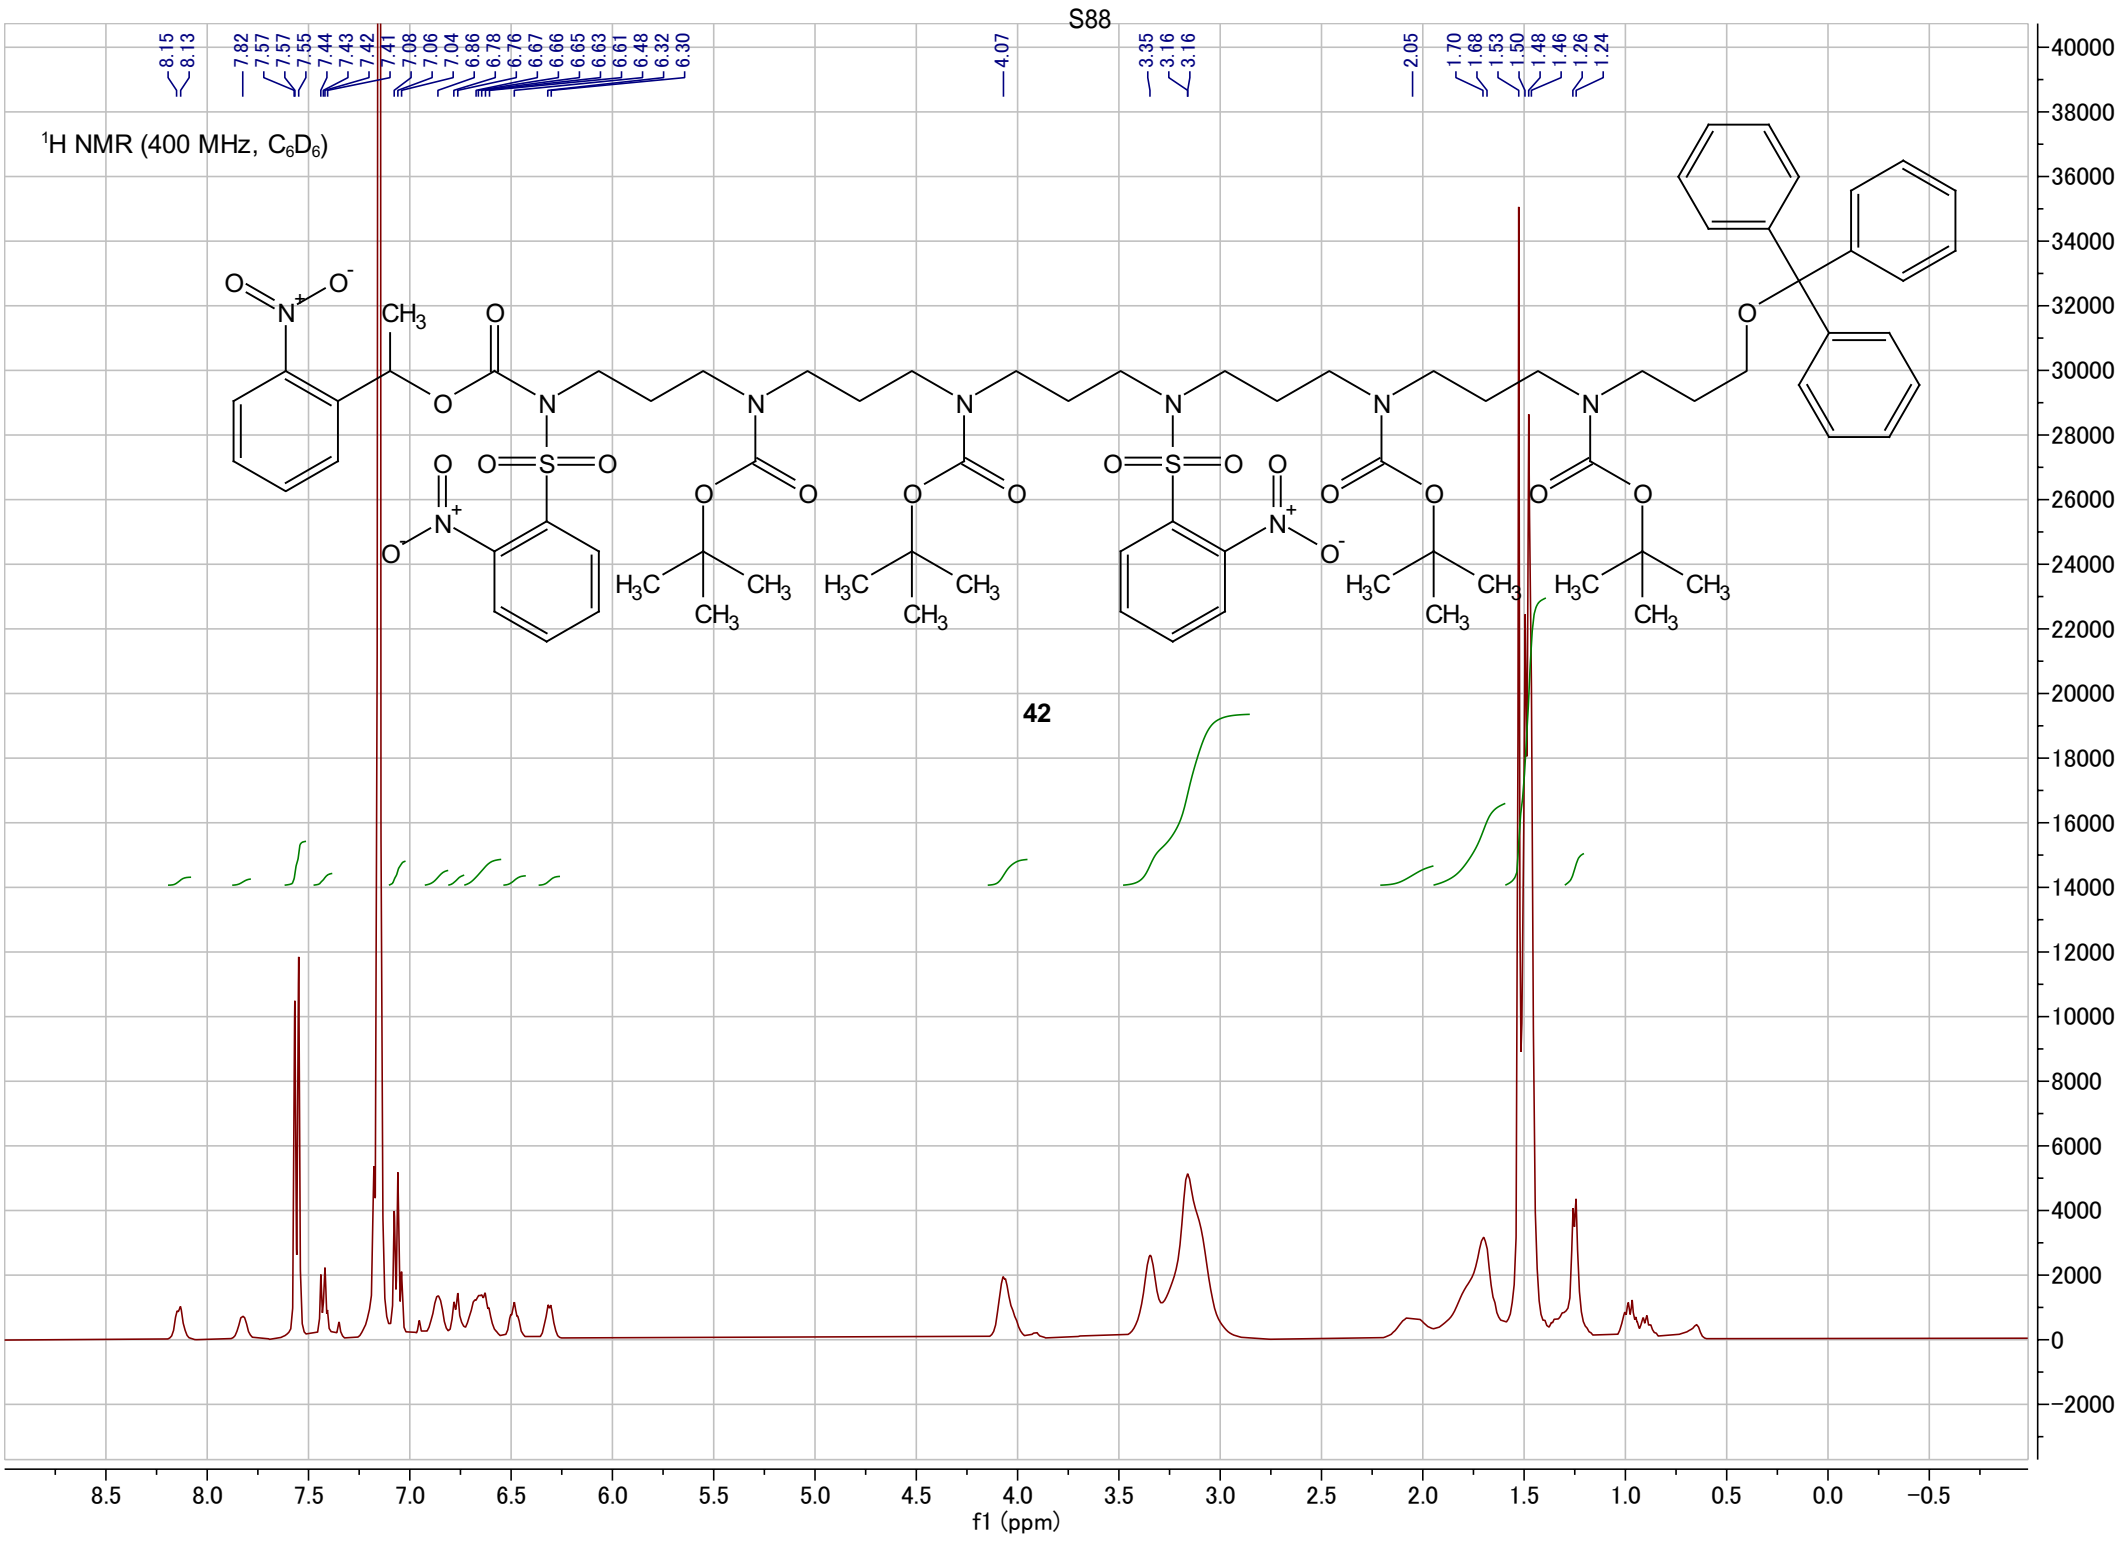



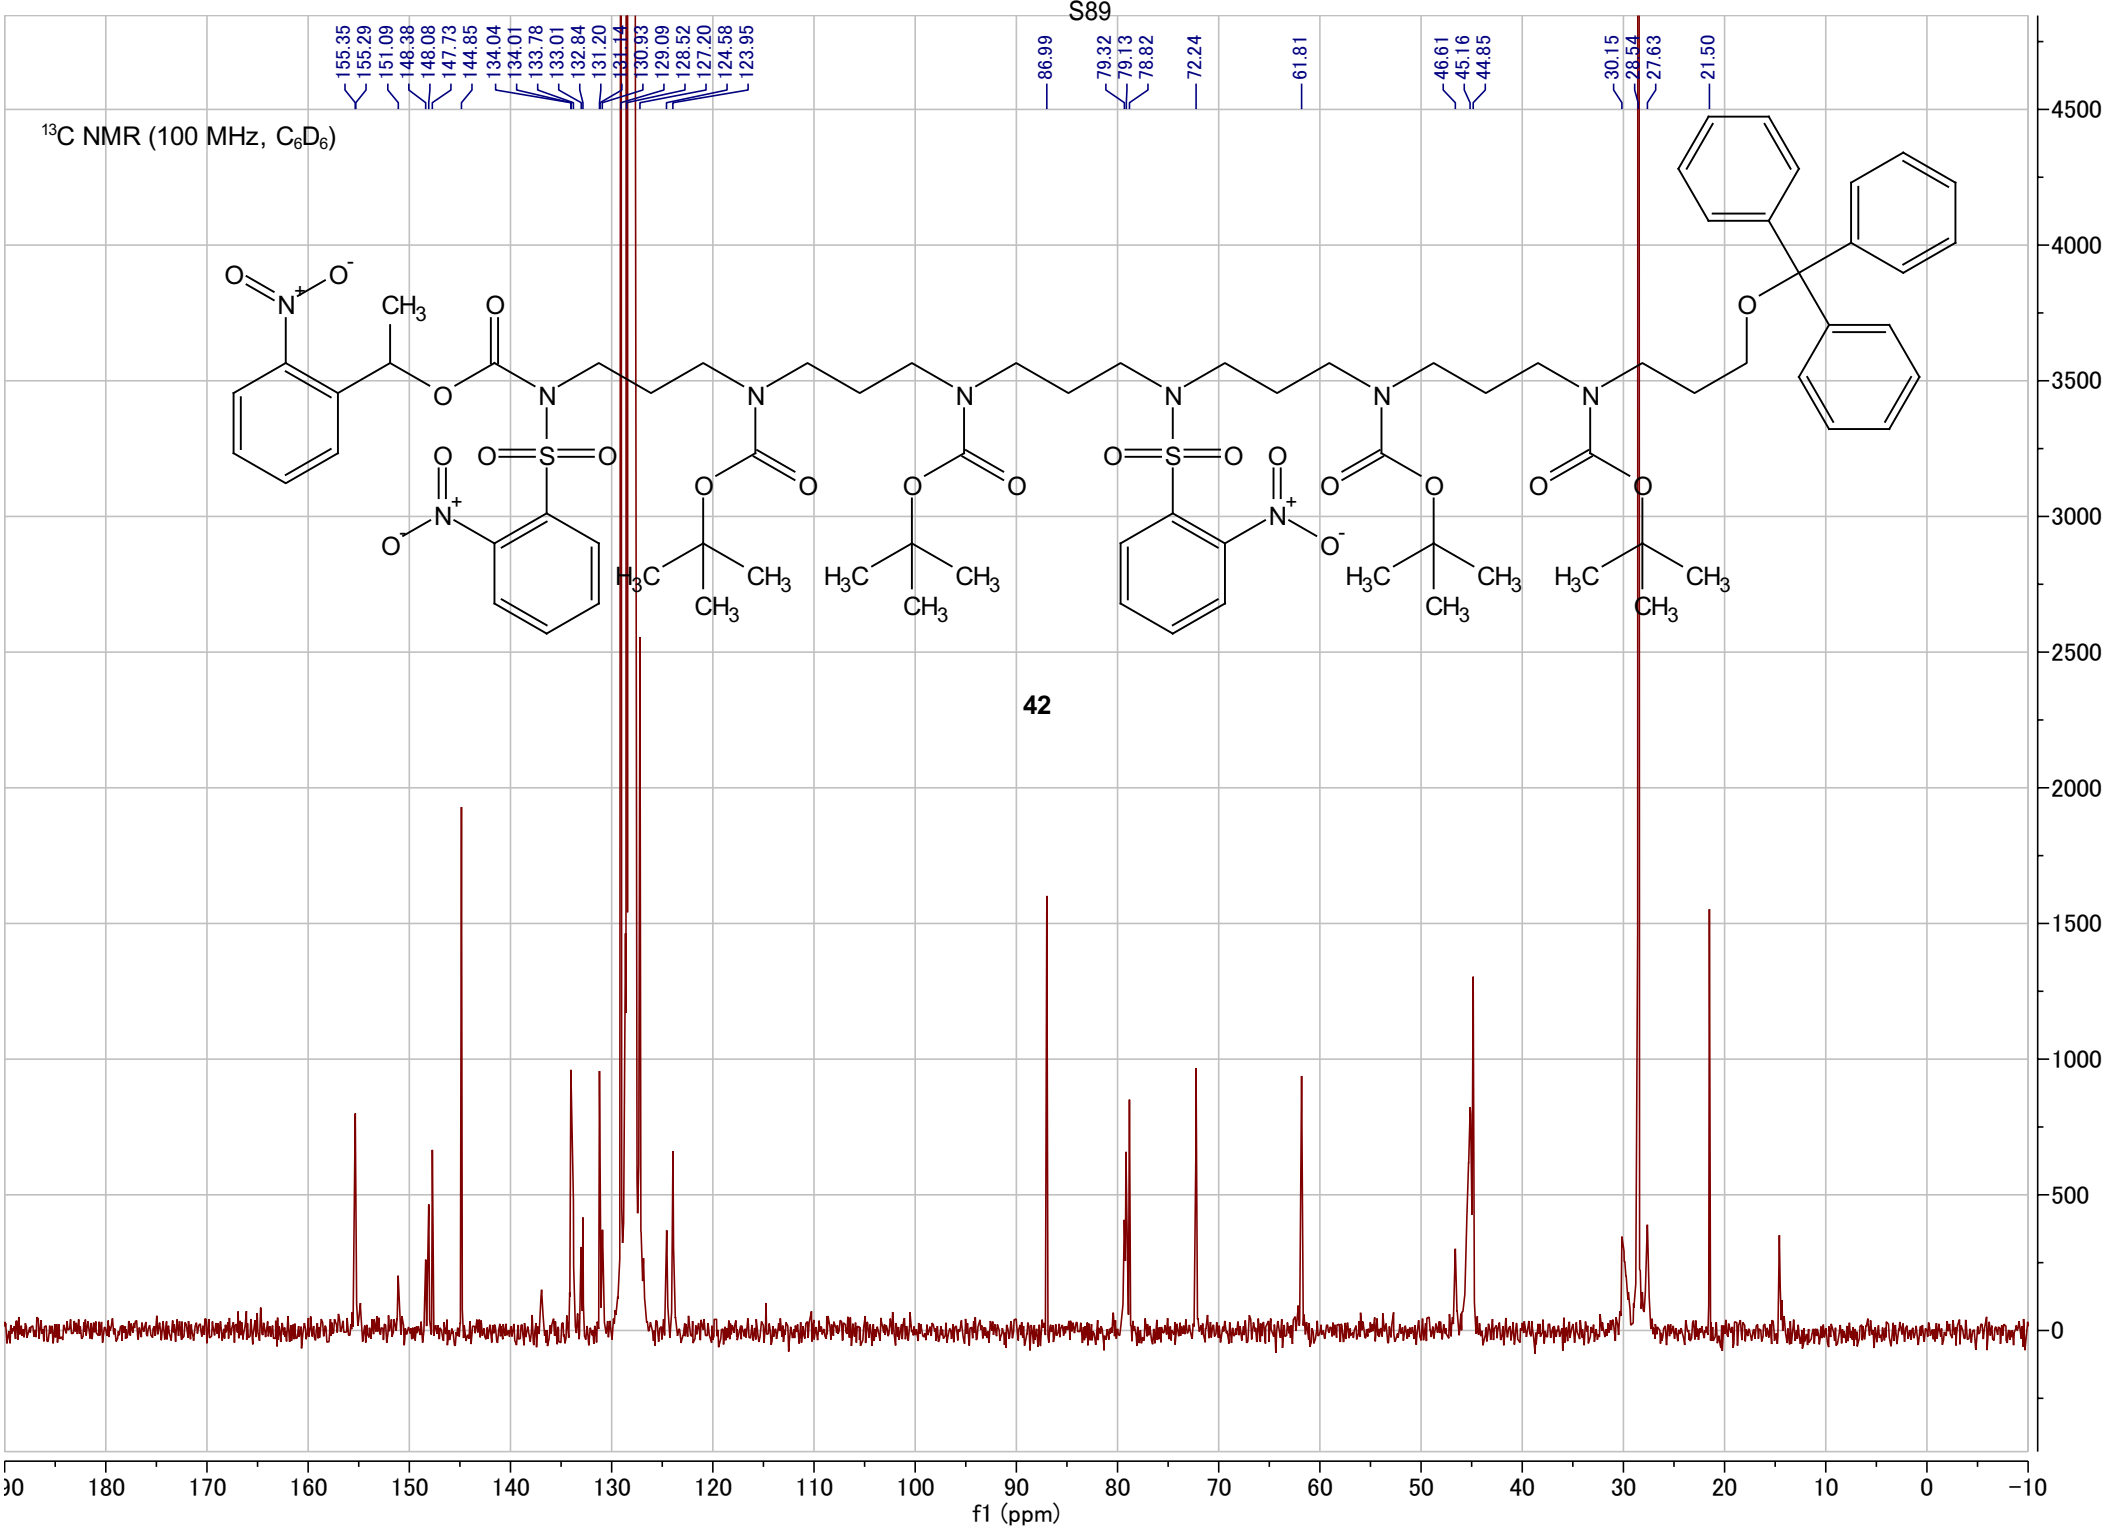



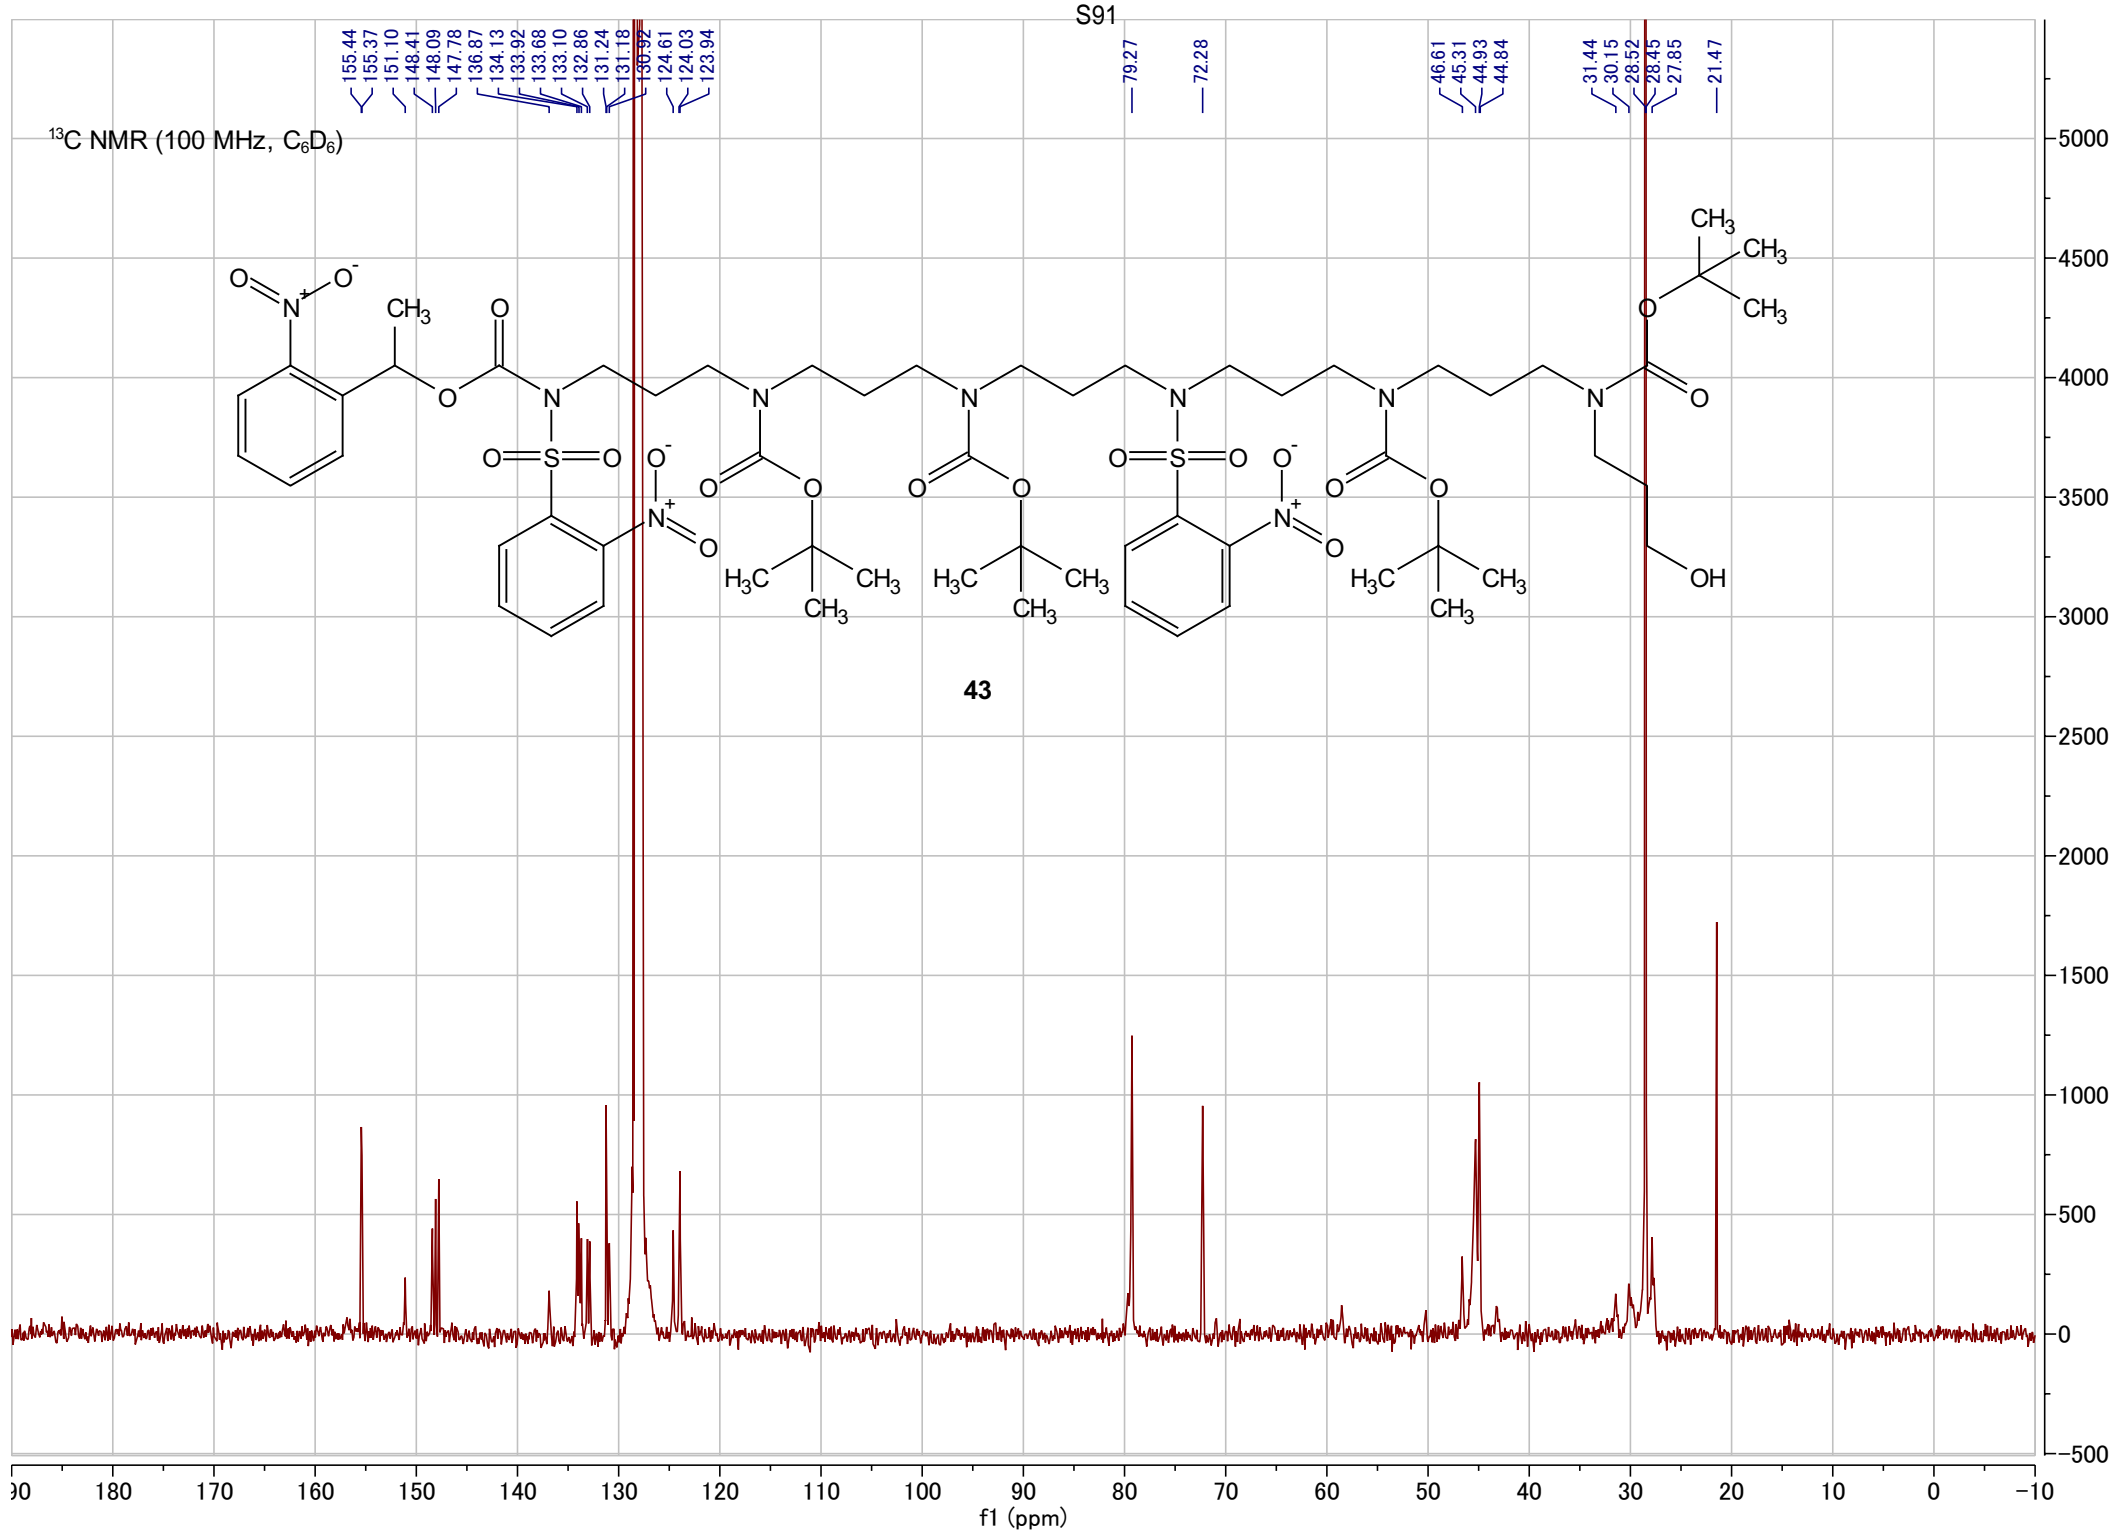

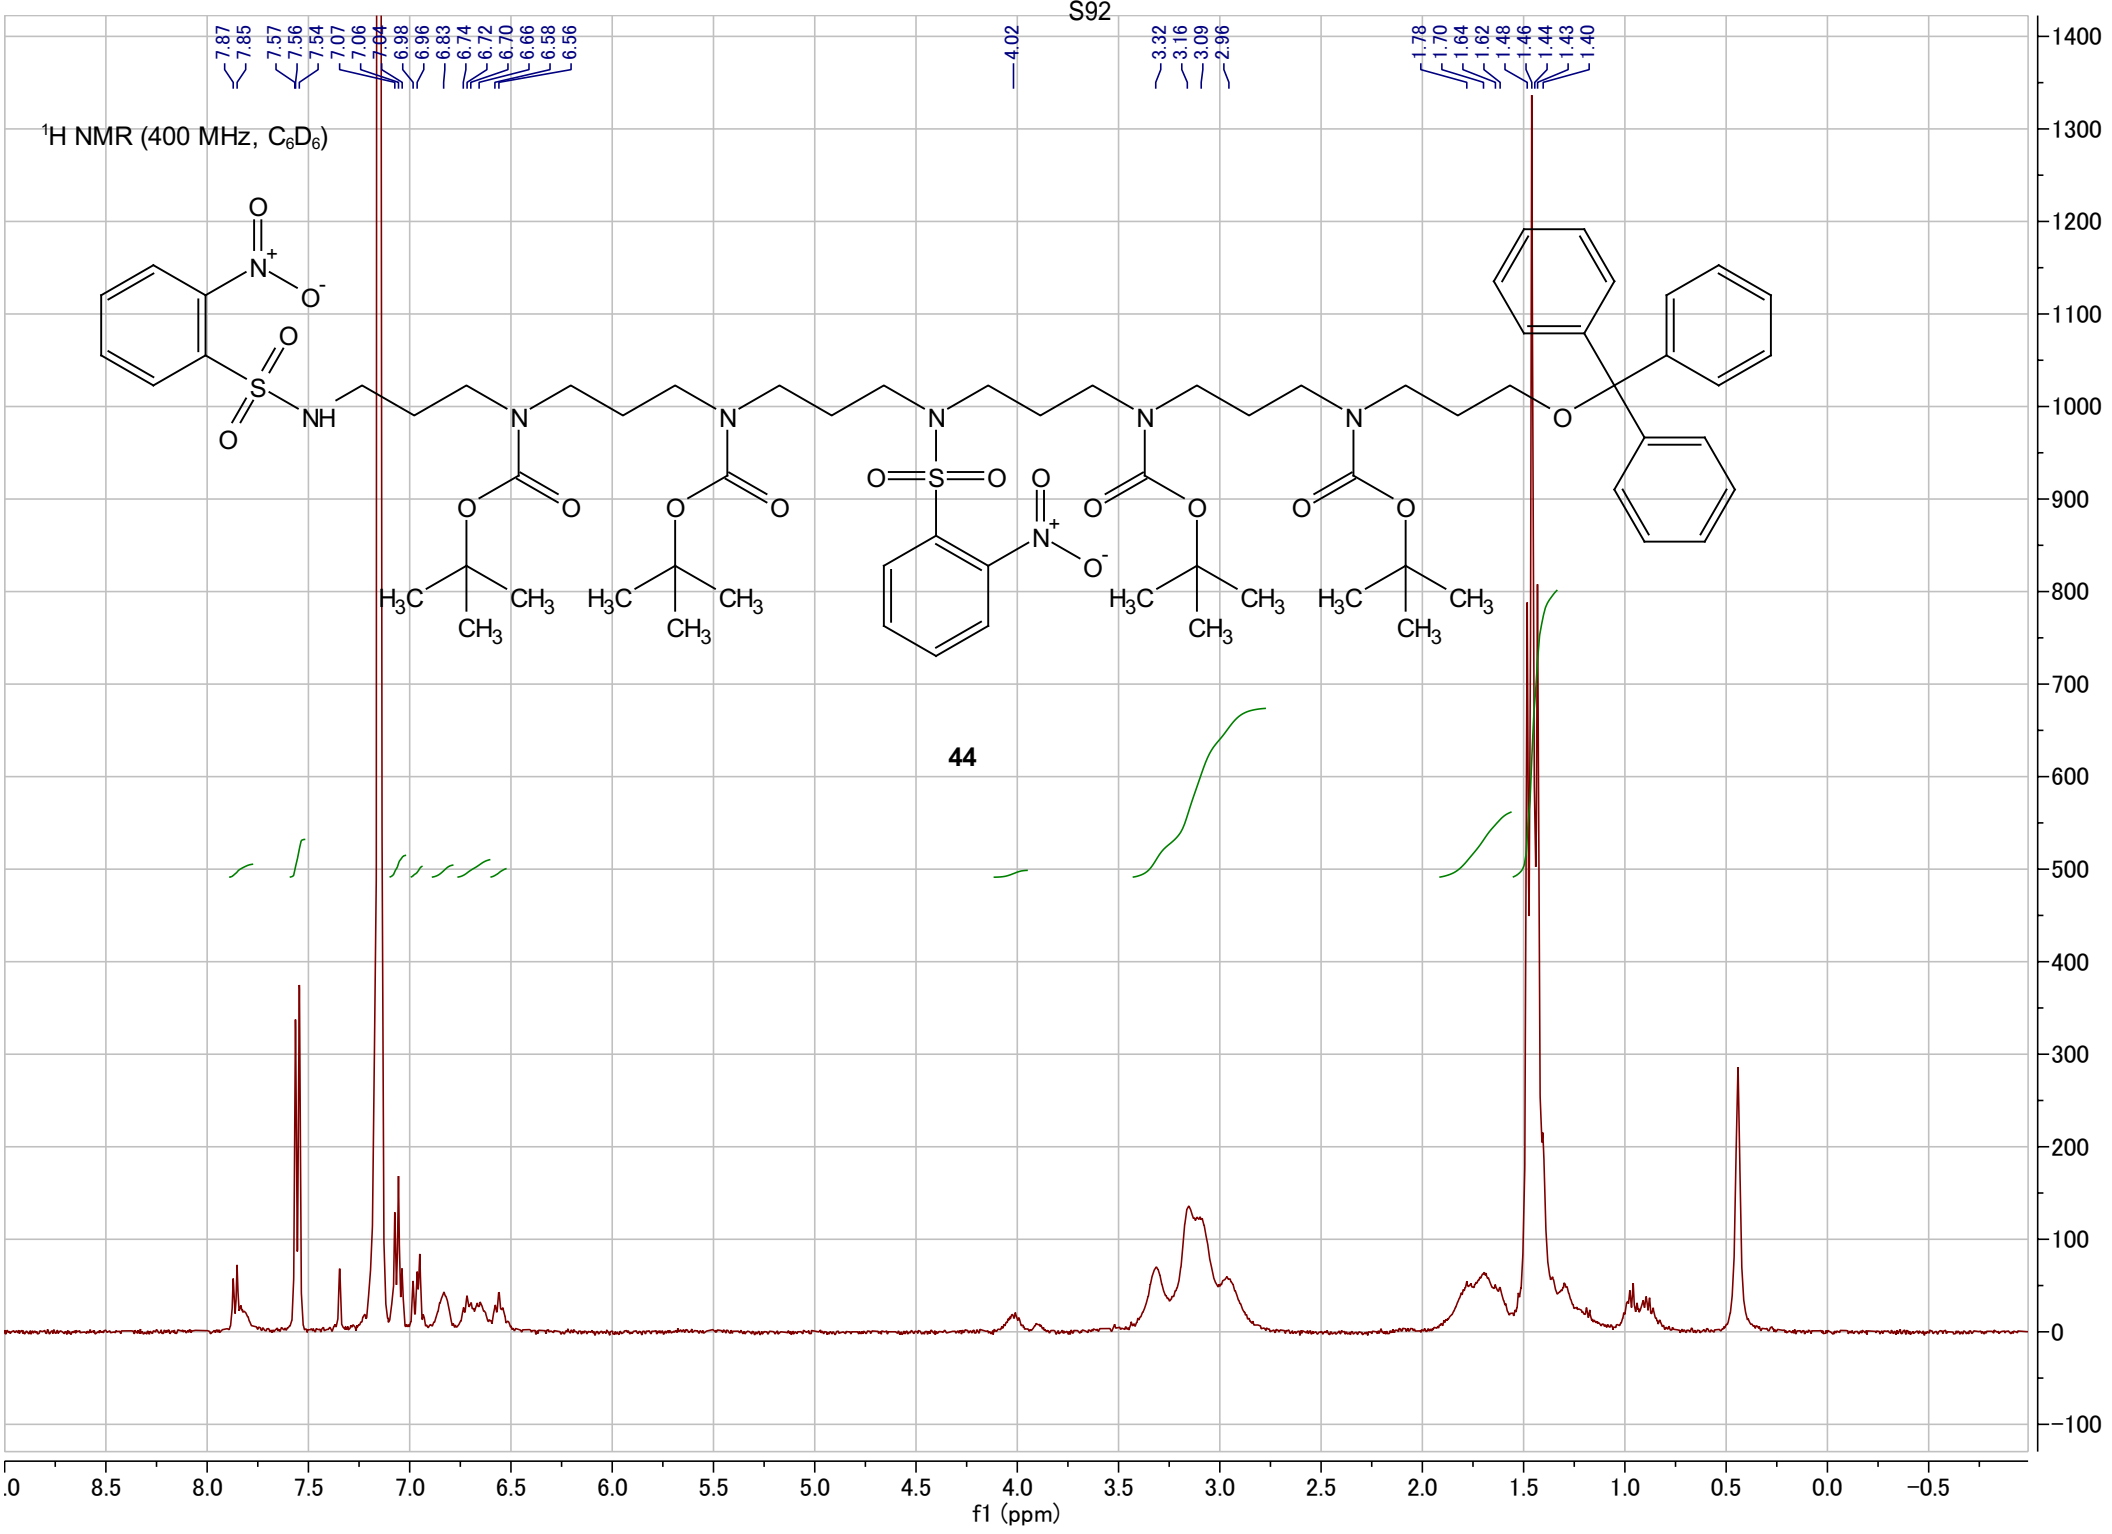



S94

<sup>1</sup>H NMR (400 MHz, C<sub>6</sub>D<sub>6</sub>)

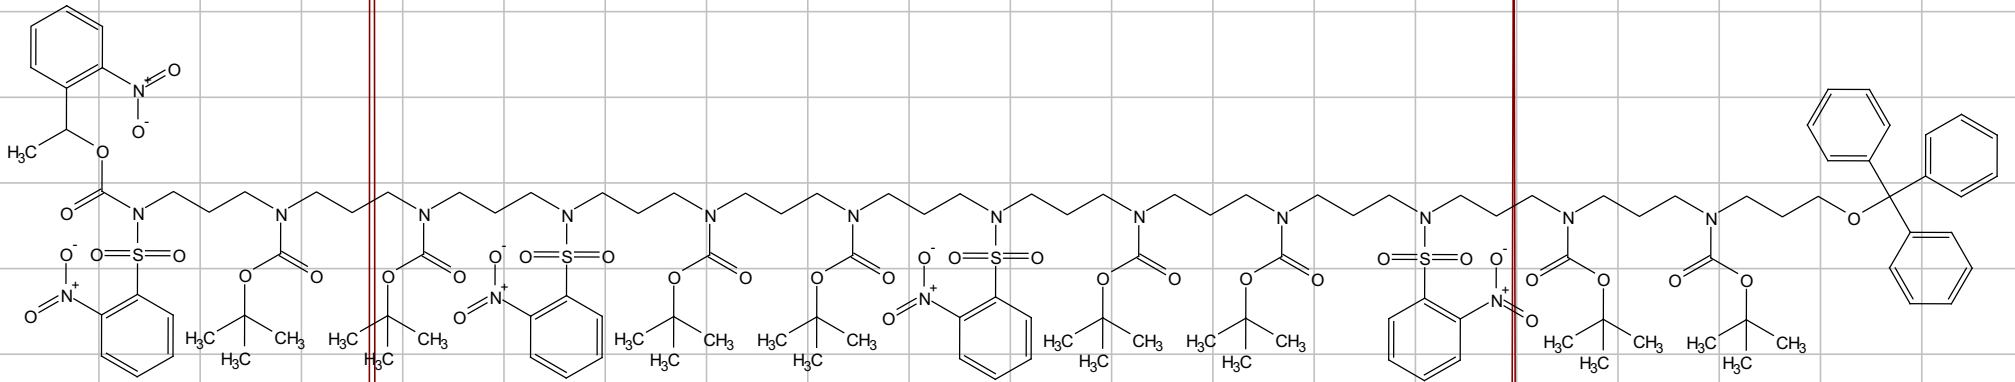

45

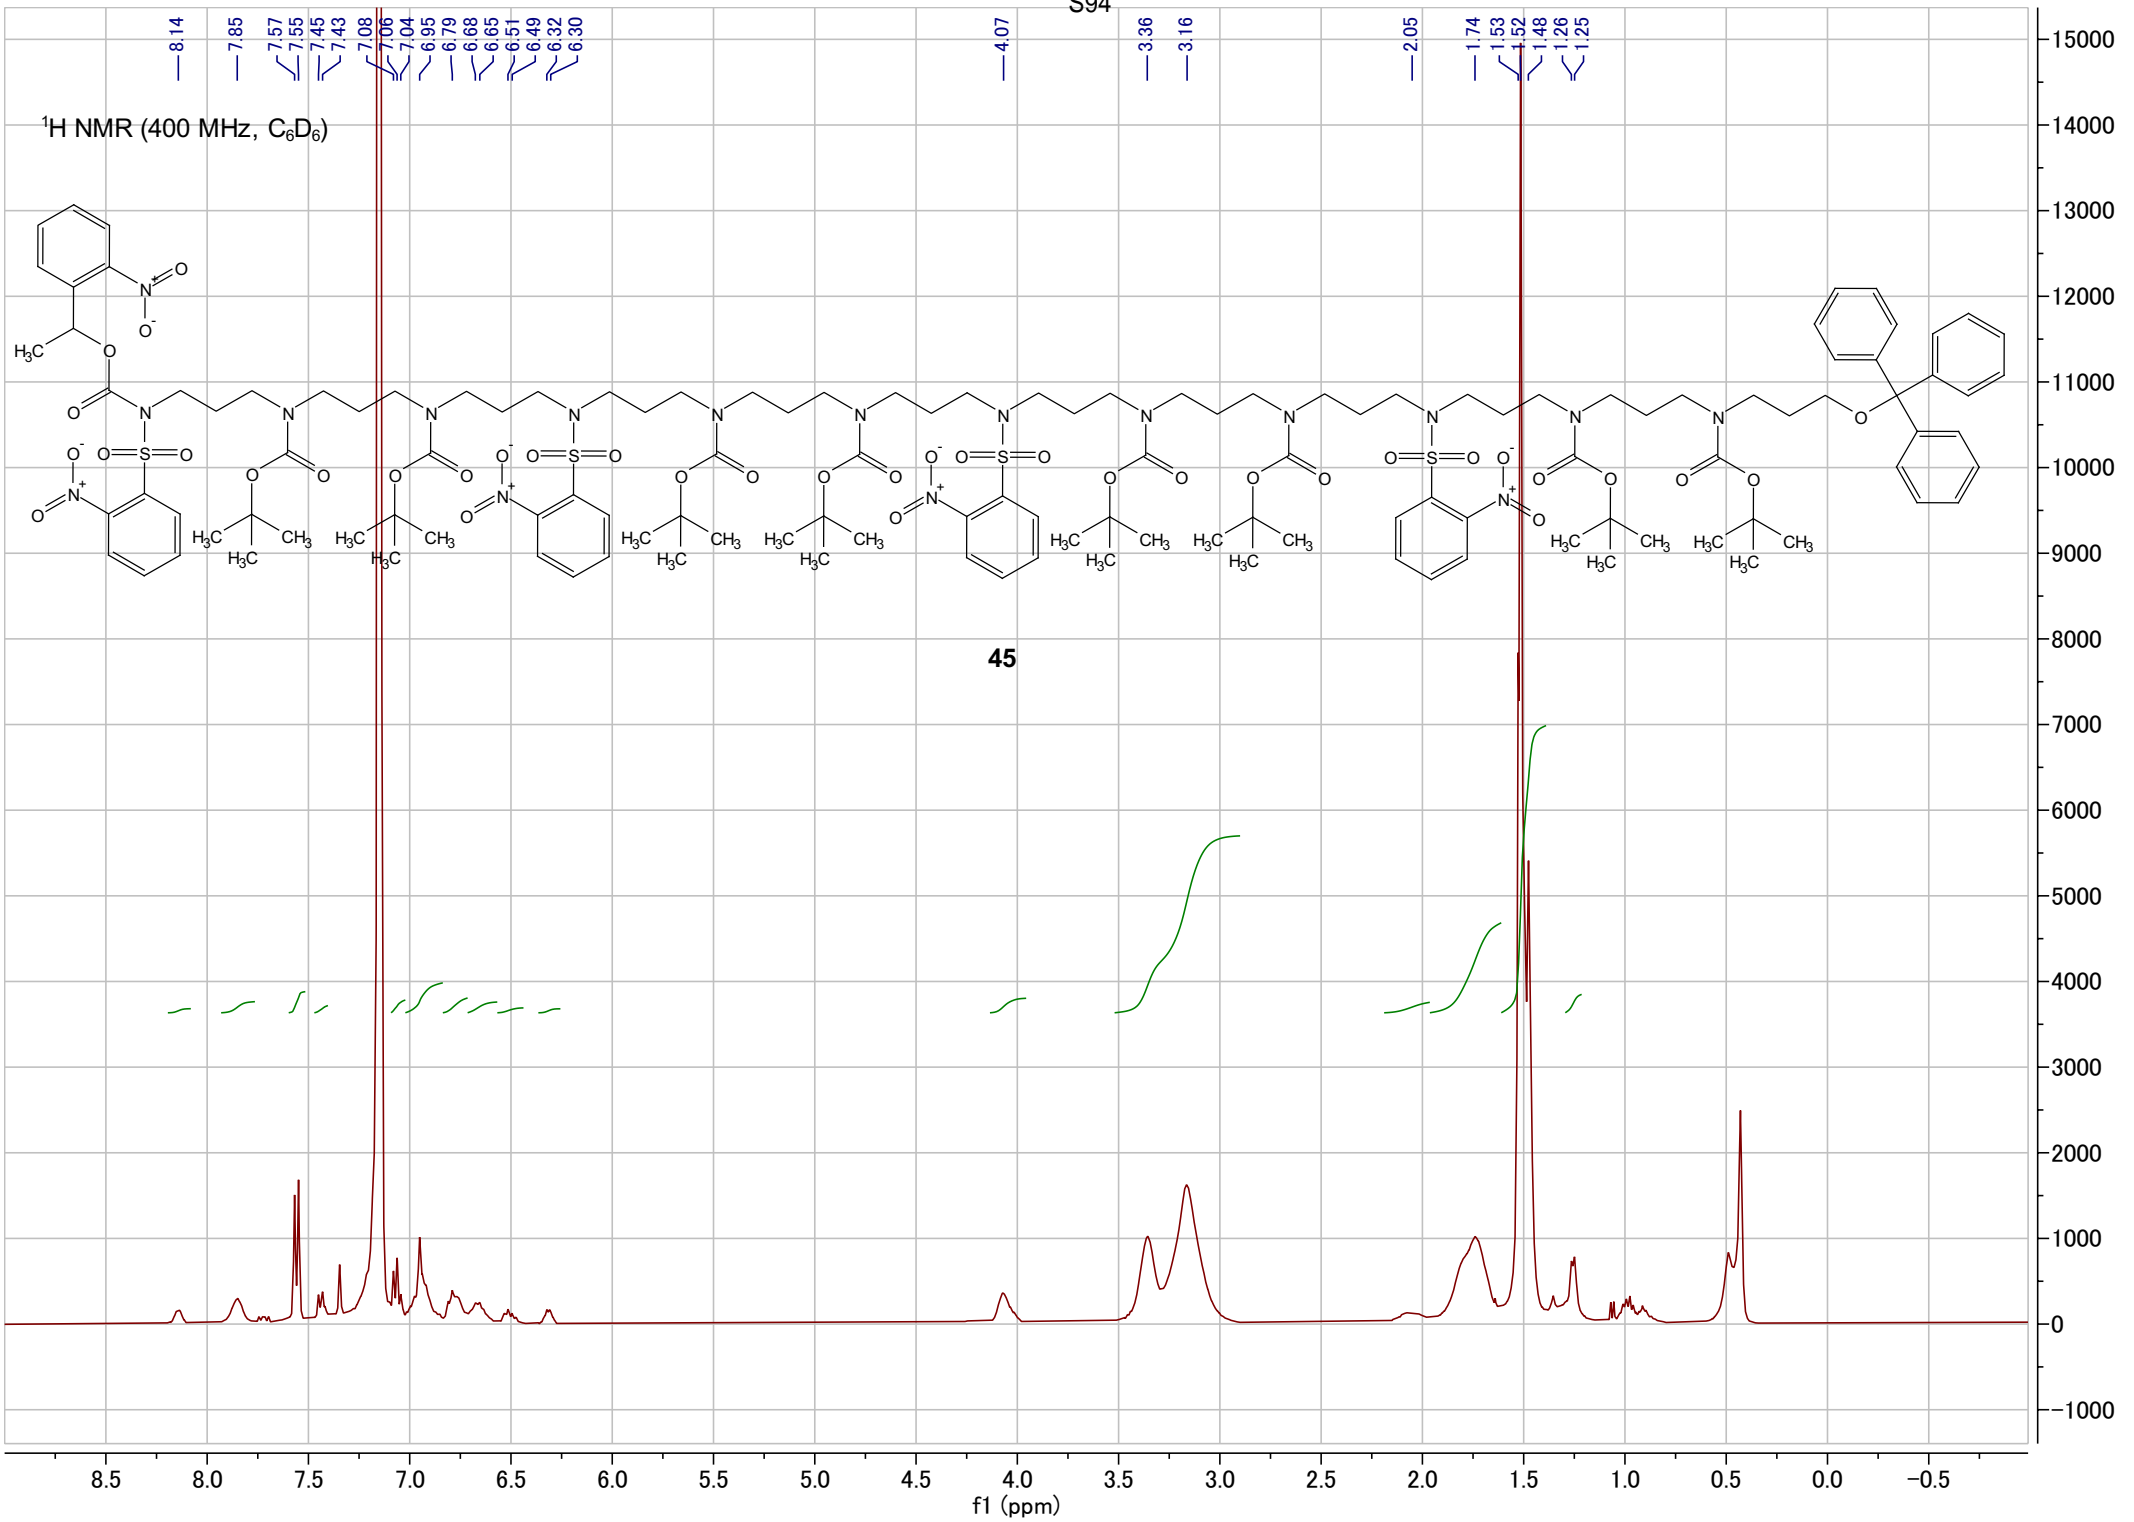



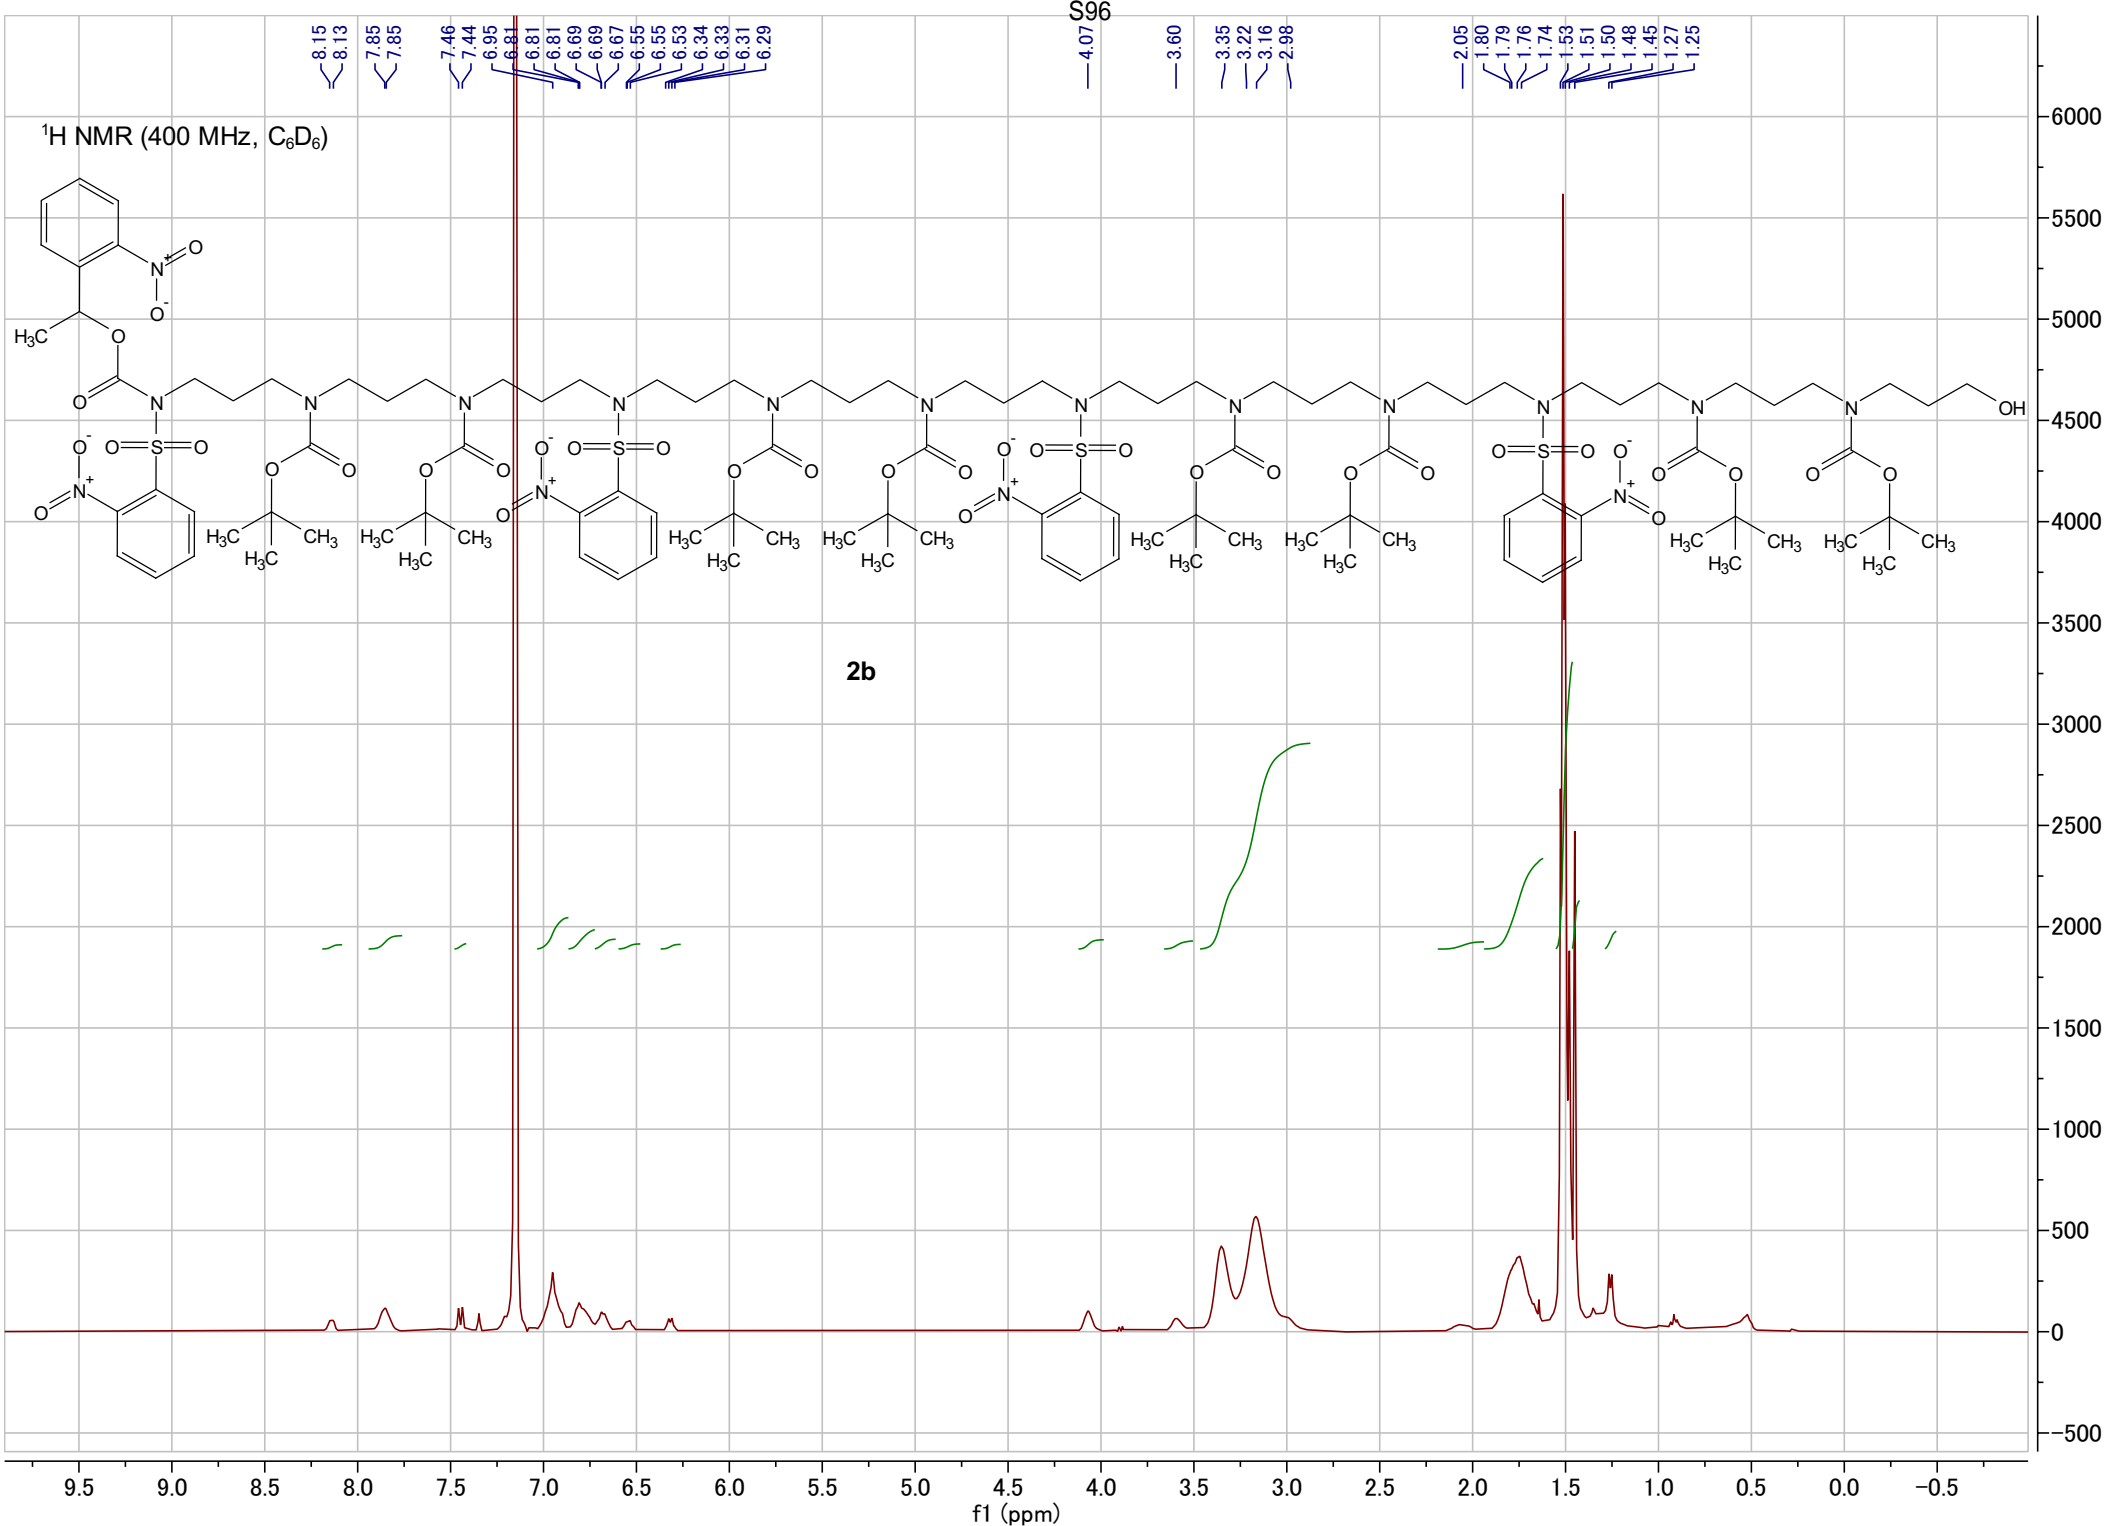

Supplement: d3ob00369h1.pdf [file d3ob00369h1.pdf]
